# Supplementary material for: Pharmacometabolomic Assessments of Atenolol and Hydrochlorothiazide Treatment Reveal Novel Drug Response Phenotypes
Source: PubMed Central journal article supplement — CPT Pharmacometrics Syst Pharmacol. 2015 Oct 29;4(11):669–79. doi: 10.1002/psp4.12017 (PMC4716583; doi:10.1002/psp4.12017), 2015-10-29

M3\_glucose

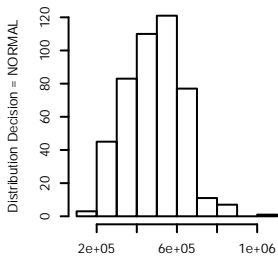

normal (skew=0.19)

M3\_glucose

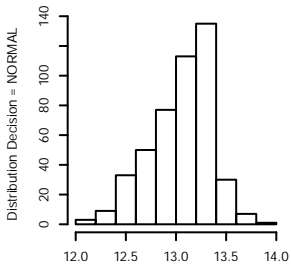

lognormal (skew=0.25)

M3\_stearic\_acid

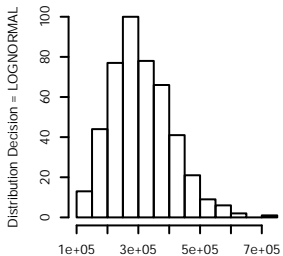

normal (skew=0.027)

M3\_stearic\_acid

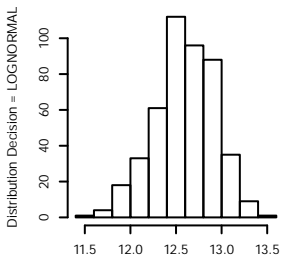

lognormal (skew=0.014)

M3\_alanine

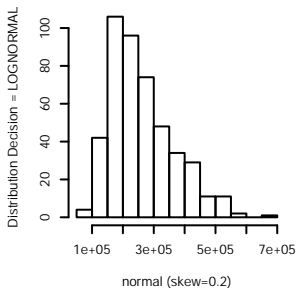

M3\_alanine

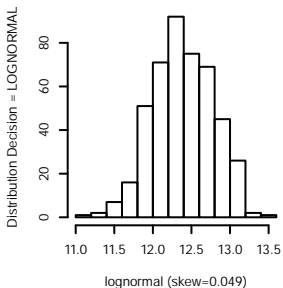

M3\_cholesterol

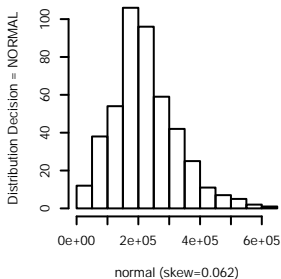

M3\_cholesterol

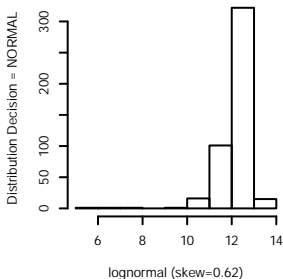

M3\_valine

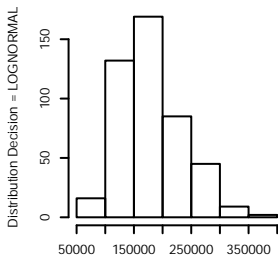

normal (skew=0.11)

M3\_valine

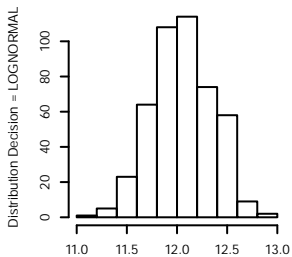

lognormal (skew=0.082)

M3\_glycine

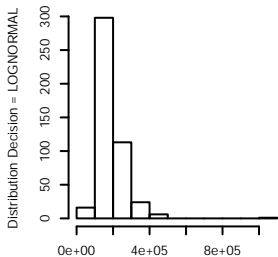

normal (skew=0.55)

M3\_glycine

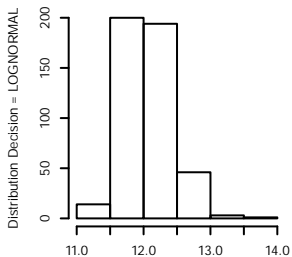

lognormal (skew=0.029)

M3\_glutamine

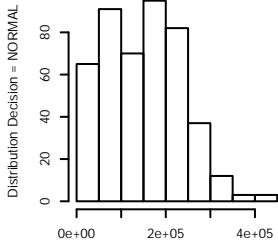

normal (skew=0.18)

M3\_glutamine

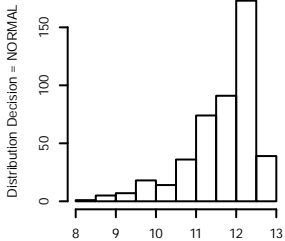

lognormal (skew=0.76)

M3\_lactic\_acid

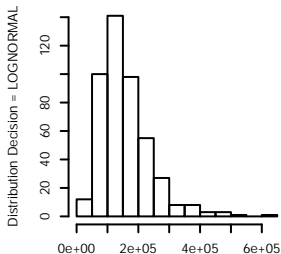

normal (skew=0.34)

M3\_lactic\_acid

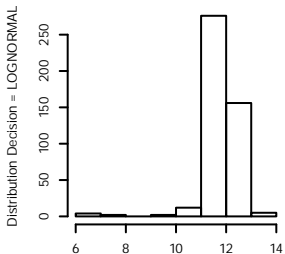

lognormal (skew=0.21)

M3\_urea

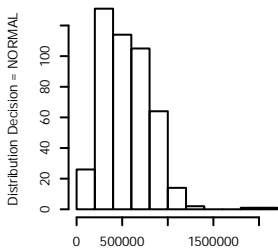

M3\_urea

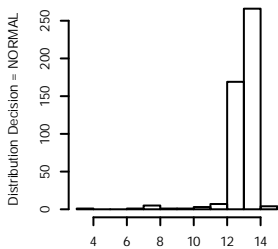

M3\_oxoproline

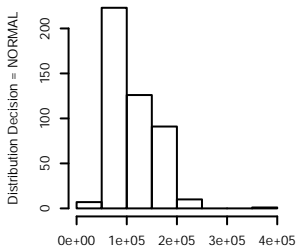

M3\_oxoproline

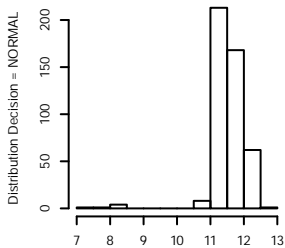

M3\_phosphoric\_acid

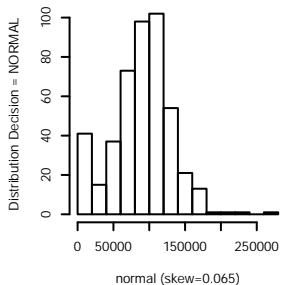

M3\_phosphoric\_acid

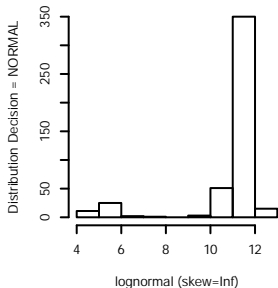

M3\_leucine

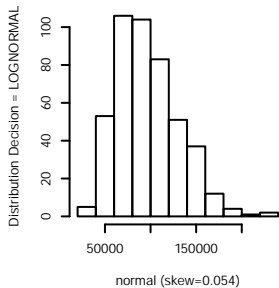

M3\_leucine

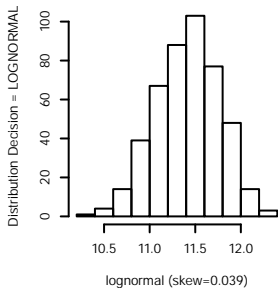

M3\_tyrosine

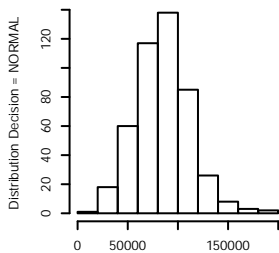

normal (skew=0.03)

M3\_tyrosine

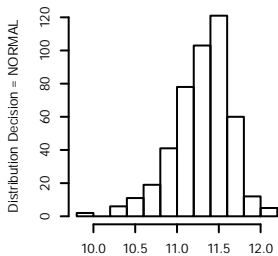

lognormal (skew=0.048)

M3\_glycerol

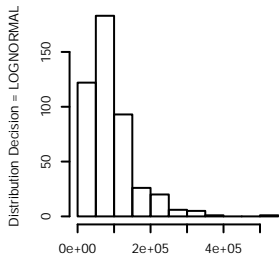

normal (skew=0.62)

M3\_glycerol

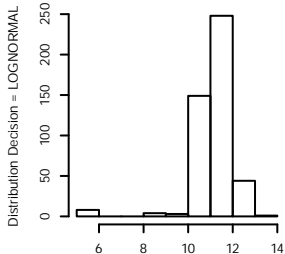

lognormal (skew=0.51)

M3\_5\_anhydroglucitol

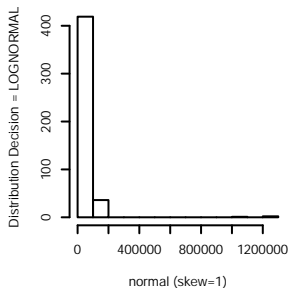

M3\_5\_anhydroglucitol

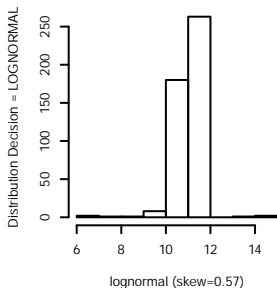

M3\_tryptophan

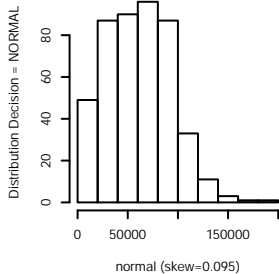

M3\_tryptophan

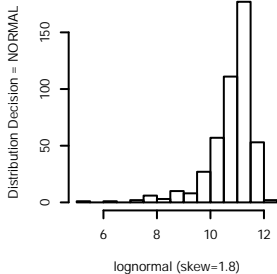



M3\_citric\_acid

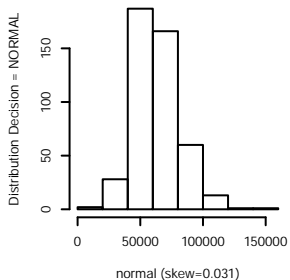

M3\_citric\_acid

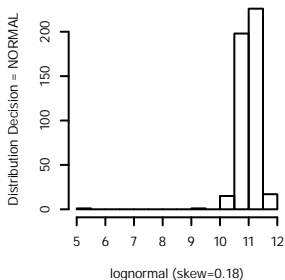

M3\_isoleucine

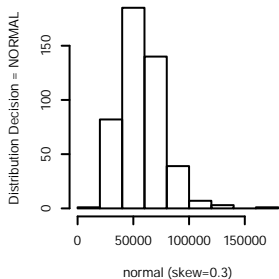

M3\_isoleucine

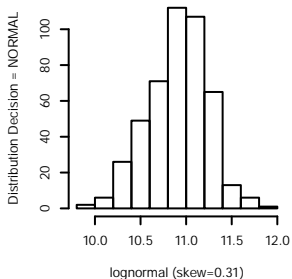

M3\_uric\_acid

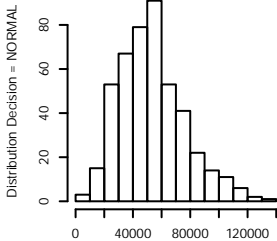

M3\_uric\_acid

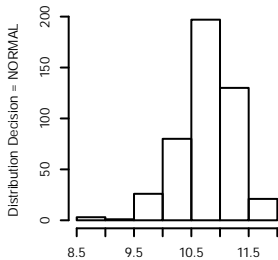

M3\_threonine

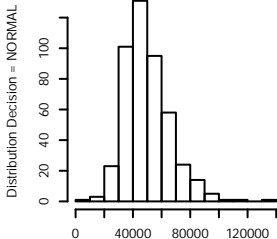

M3\_threonine

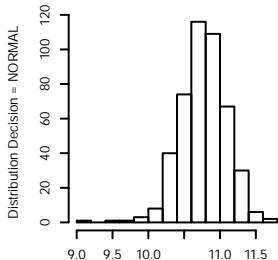

M3\_lysine

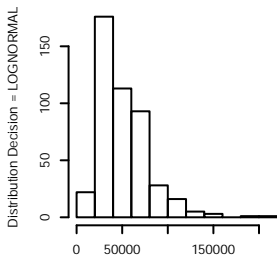

normal (skew=0.31)

M3\_lysine

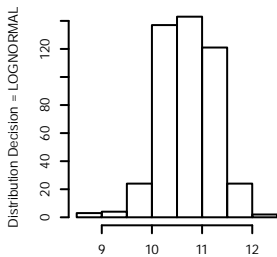

lognormal (skew=0.11)

M3\_serine

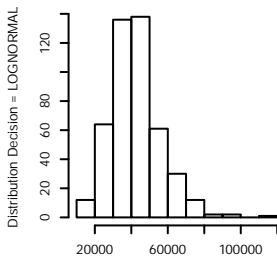

normal (skew=0.058)

M3\_serine

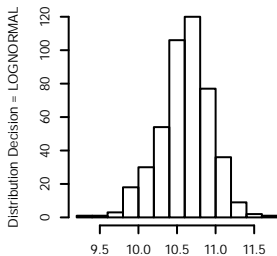

lognormal (skew=0.043)

M3\_palmitic\_acid

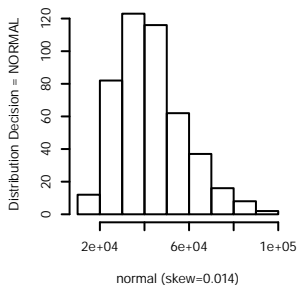

M3\_palmitic\_acid

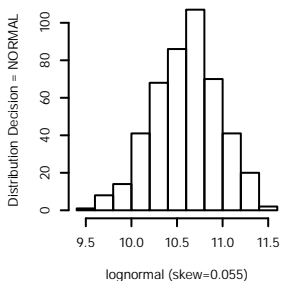

M3\_proline

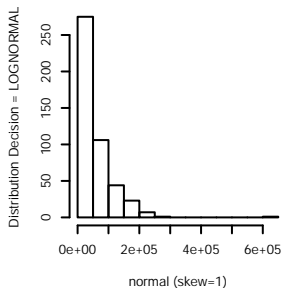

M3\_proline

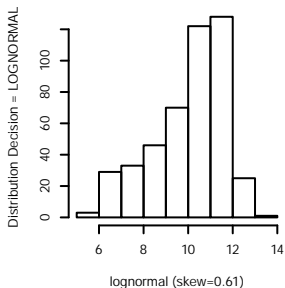

M3\_ornithine

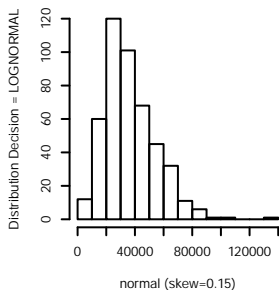

M3\_ornithine

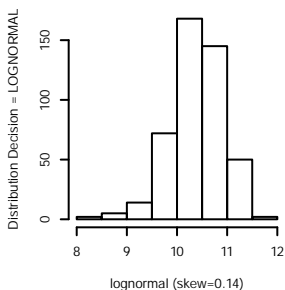

M3\_hydroxybutanoic\_acid

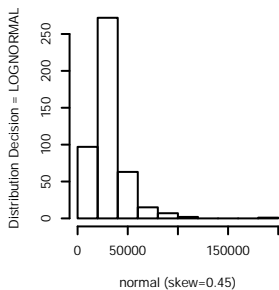

M3\_hydroxybutanoic\_acid

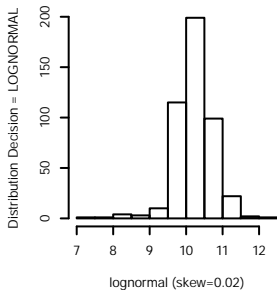

M3\_phenylalanine

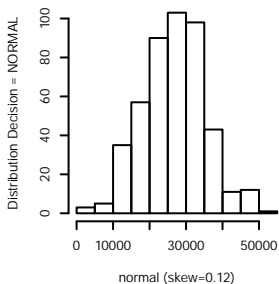

M3\_phenylalanine

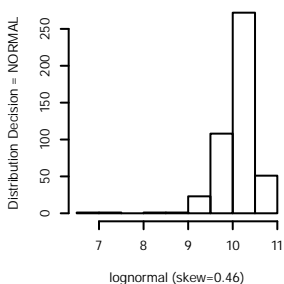

M3\_pelargonic\_acid

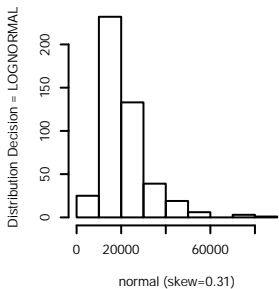

M3\_pelargonic\_acid

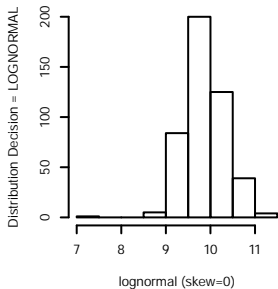

M3\_histidine

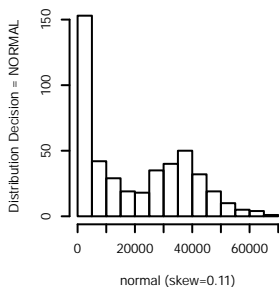

M3\_histidine

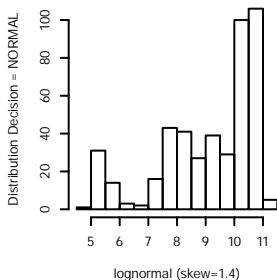

M3\_inositol\_myo\_

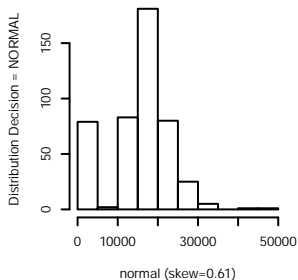

M3\_inositol\_myo\_

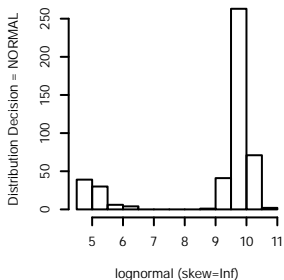

M3\_glutamic\_acid

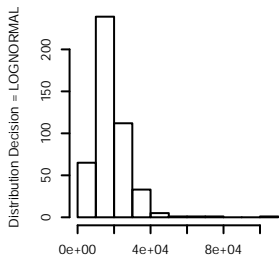

M3\_glutamic\_acid

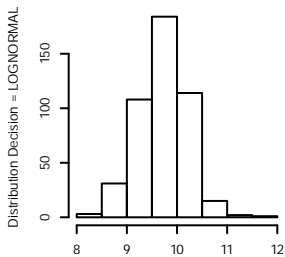

M3\_n\_methylalanine

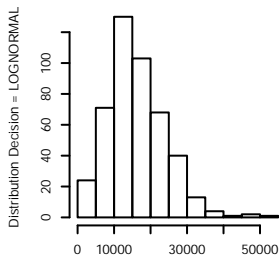

M3\_n\_methylalanine

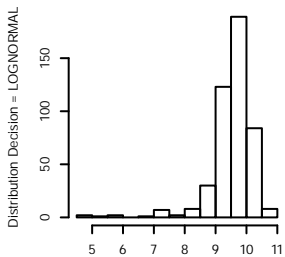



M3\_benzoic\_acid

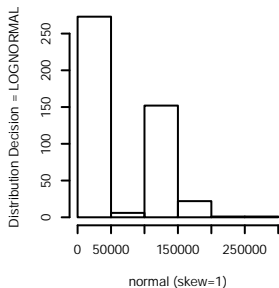

M3\_benzoic\_acid

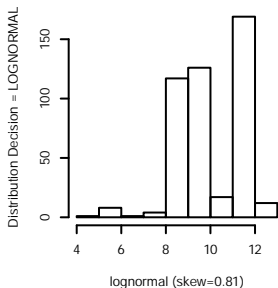

M3\_lauric\_acid

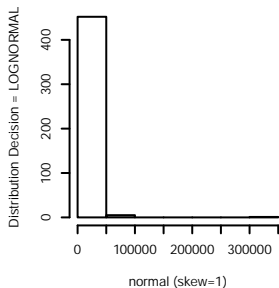

M3\_lauric\_acid

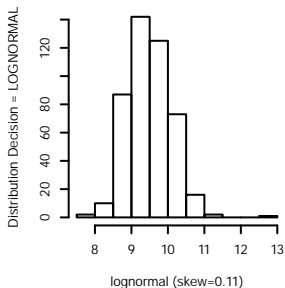

M3\_pentadecanoic\_acid

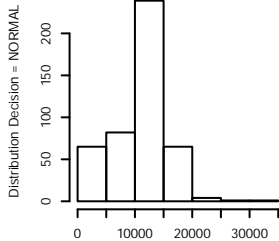

normal (skew=0.54)

M3\_pentadecanoic\_acid

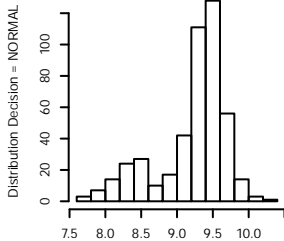

lognormal (skew=1.4)

M3\_beta\_mannosylglycerate

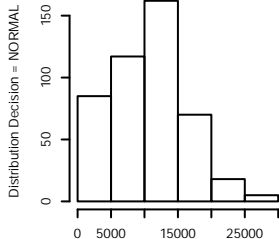

normal (skew=0.2)

M3\_beta\_mannosylglycerate

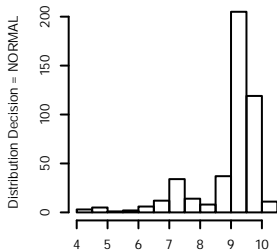

lognormal (skew=6)

M3\_talose

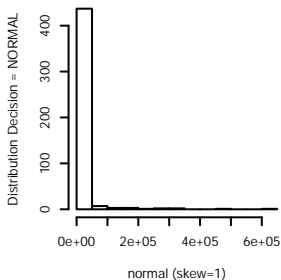

M3\_talose

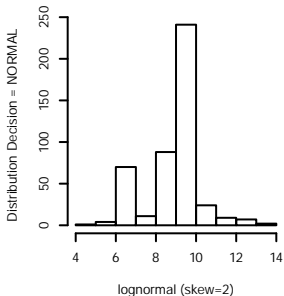

M3\_iminodiacetic\_acid

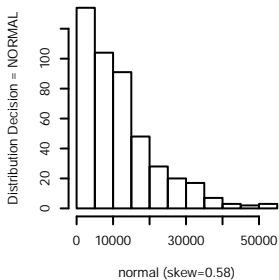

M3\_iminodiacetic\_acid

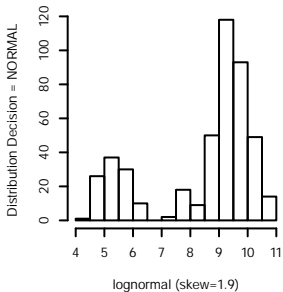

M3\_hydroxybutanoic\_acid\_1

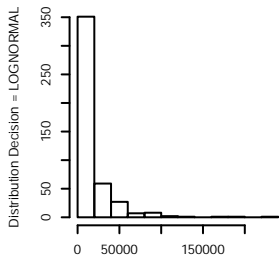

normal (skew=1)

M3\_hydroxybutanoic\_acid\_1

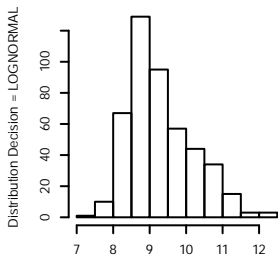

lognormal (skew=0.22)

M3\_oleic\_acid

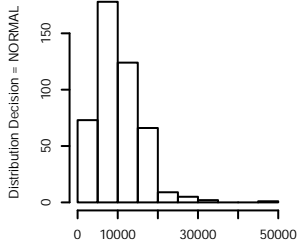

normal (skew=0)

M3\_oleic\_acid

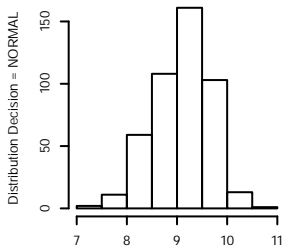

lognormal (skew=0.055)

M3\_glyceric\_acid

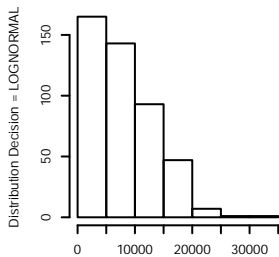

normal (skew=0.35)

M3\_glyceric\_acid

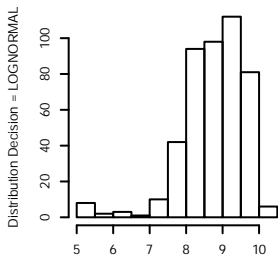

lognormal (skew=0.18)

M3\_creatinine

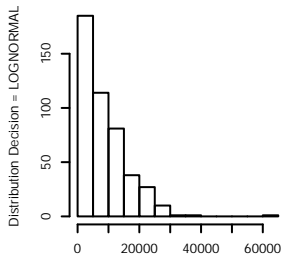

normal (skew=0.51)

M3\_creatinine

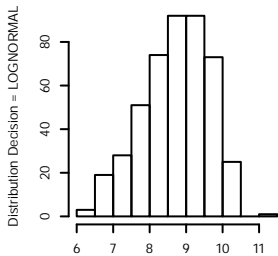

lognormal (skew=0.026)

M3\_ketoisocaproic\_acid

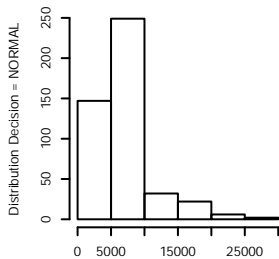

normal (skew=0.098)

M3\_ketoisocaproic\_acid

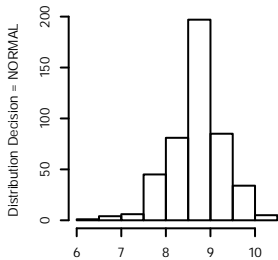

lognormal (skew=0.29)

M3\_asparagine

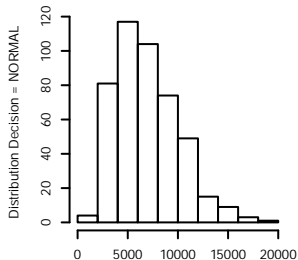

normal (skew=0.026)

M3\_asparagine

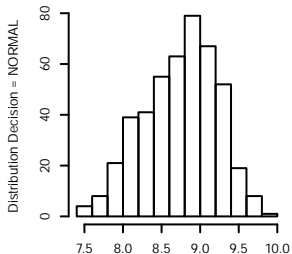

lognormal (skew=0.051)

M3\_\_monoolein

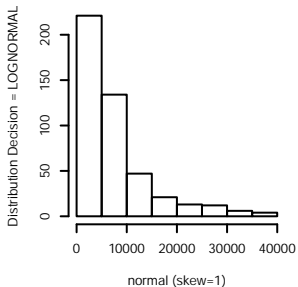

M3\_\_monoolein

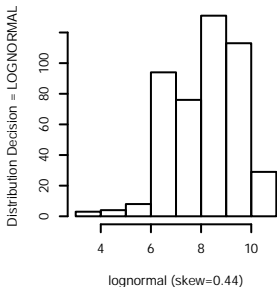

M3\_cystine

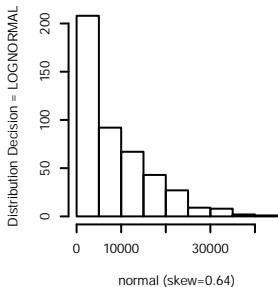

M3\_cystine

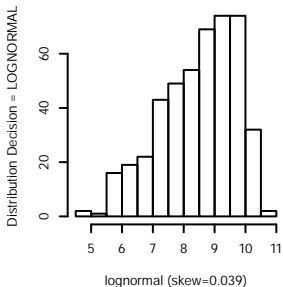

M3\_acetophenone\_nist

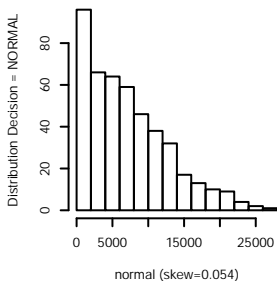

M3\_acetophenone\_nist

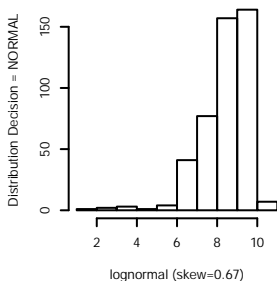

M3\_fructose

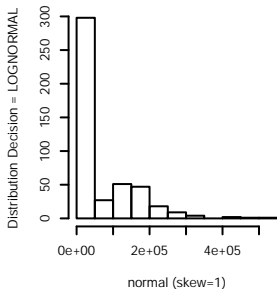

M3\_fructose

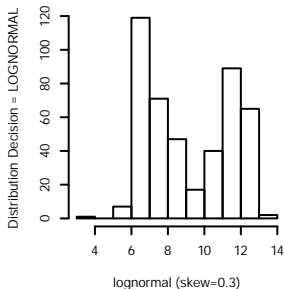



M3\_methylhexadecanoic\_acid

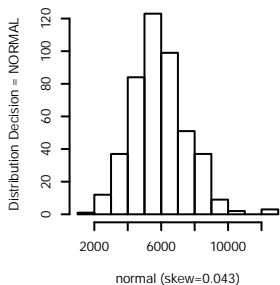

M3\_methylhexadecanoic\_acid

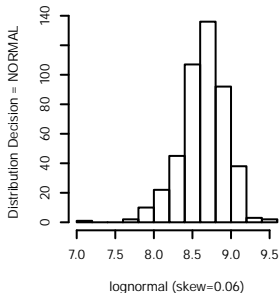

M3\_methionine

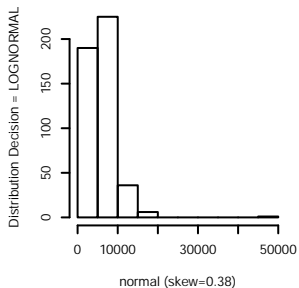

M3\_methionine

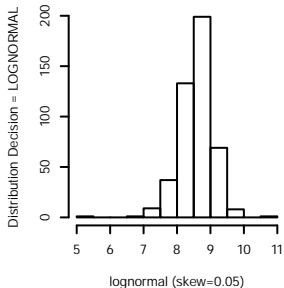

M3\_ketoadipic\_acid

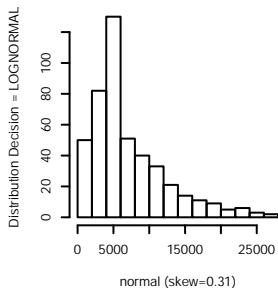

M3\_ketoadipic\_acid

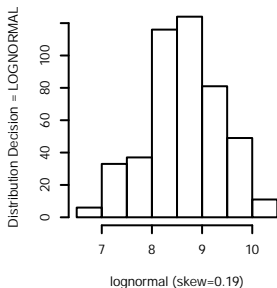

M3\_tocopherol\_alpha

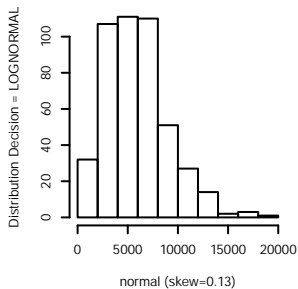

M3\_tocopherol\_alpha

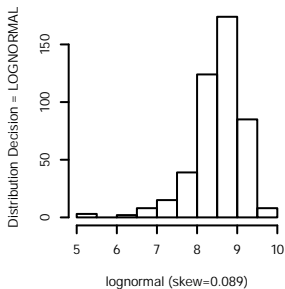

M3\_capric\_acid

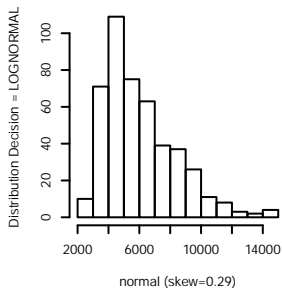

M3\_capric\_acid

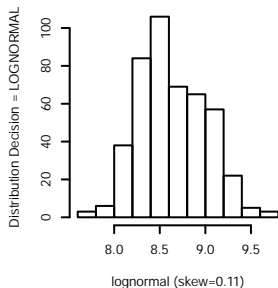

M3\_arachidic\_acid

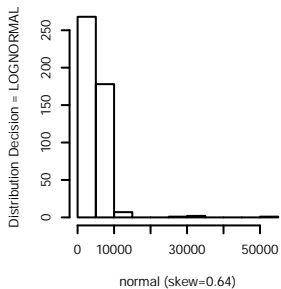

M3\_arachidic\_acid

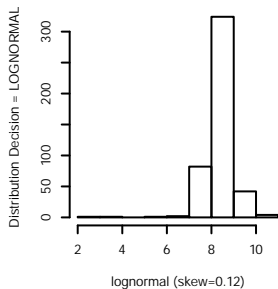

M3\_deoxyglucitol\_nist

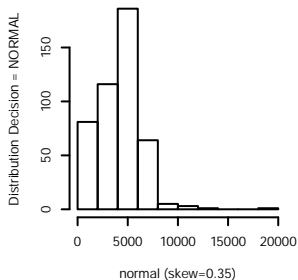

M3\_deoxyglucitol\_nist

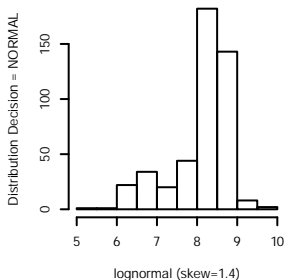

M3\_diacetone\_alcohol\_nist

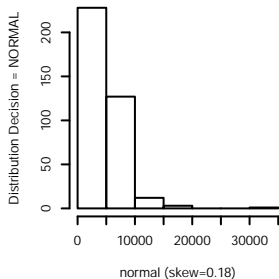

M3\_diacetone\_alcohol\_nist

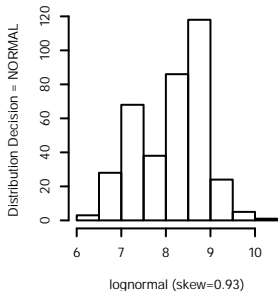

M3\_palmitoleic\_acid

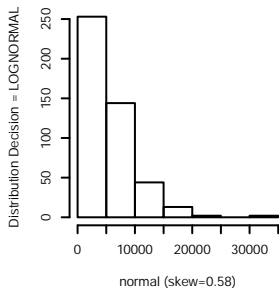

M3\_palmitoleic\_acid

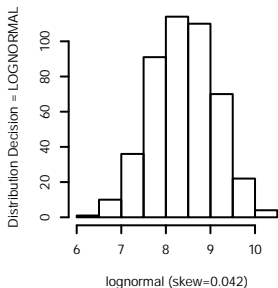

M3\_hydroxyvaleric\_acid

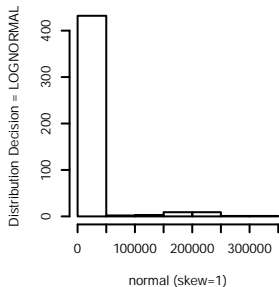

M3\_hydroxyvaleric\_acid

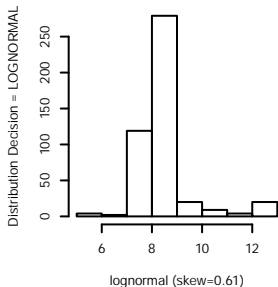

M3\_hydroxylamine

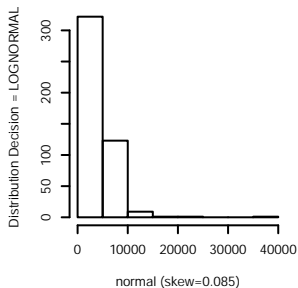

M3\_hydroxylamine

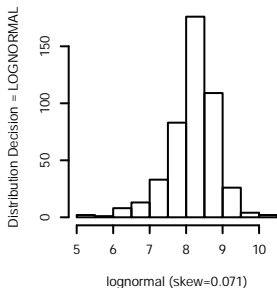

M3\_myristic\_acid

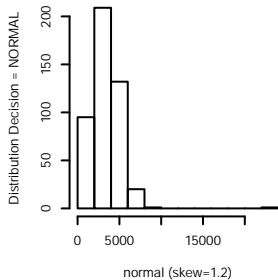

M3\_myristic\_acid

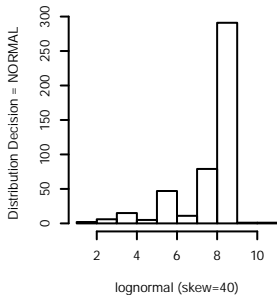

M3\_methionine\_sulfoxide

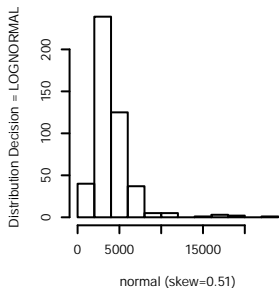

M3\_methionine\_sulfoxide

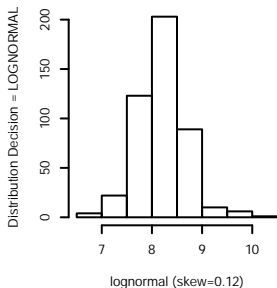

M3\_nicotinic\_acid

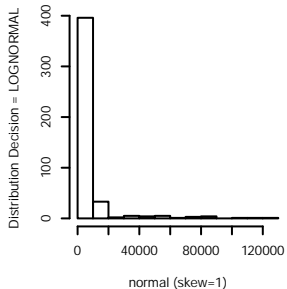

M3\_nicotinic\_acid

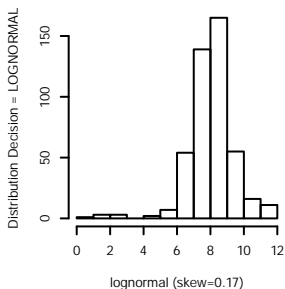

M3\_aminomalonic\_acid

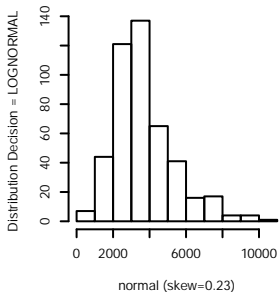

M3\_aminomalonic\_acid

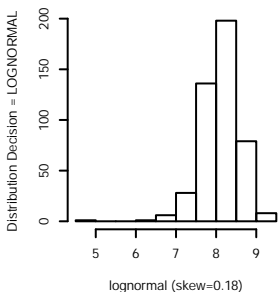

M3\_hydroxypropionic\_acid

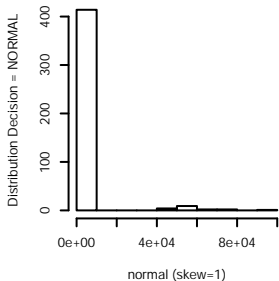

M3\_hydroxypropionic\_acid

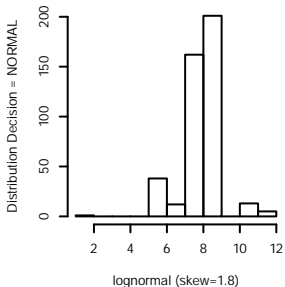



M3\_linoleic\_acid

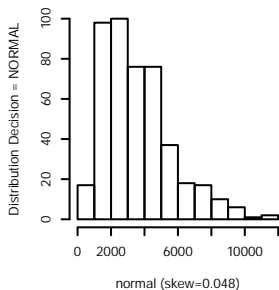

M3\_linoleic\_acid

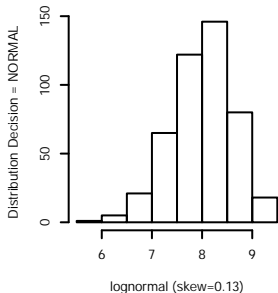

M3\_phenol

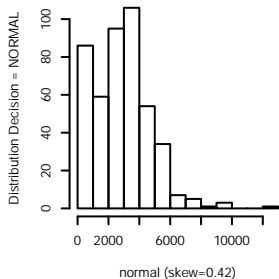

M3\_phenol

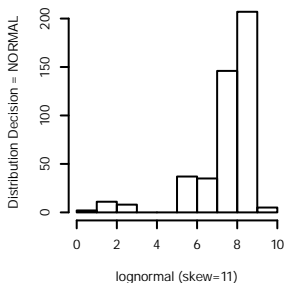

M3\_pseudo\_uridine

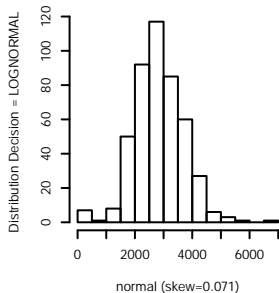

M3\_pseudo\_uridine

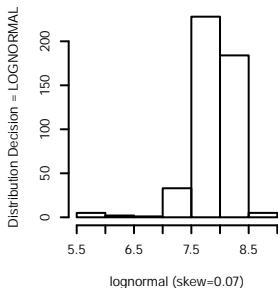

M3\_deoxytetriconic\_acid\_nist

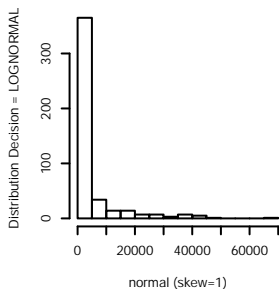

M3\_deoxytetriconic\_acid\_nist

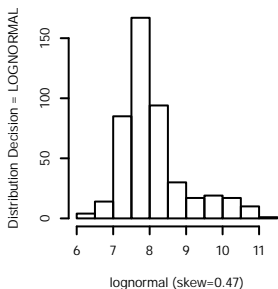

M3\_glycolic\_acid

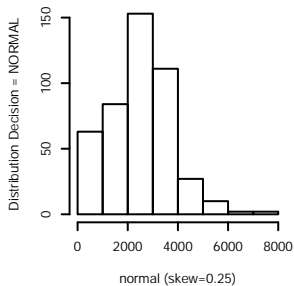

M3\_glycolic\_acid

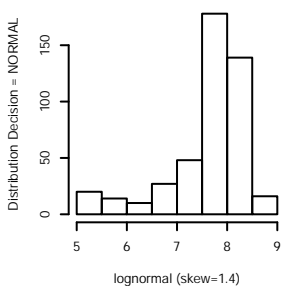

M3\_cysteine

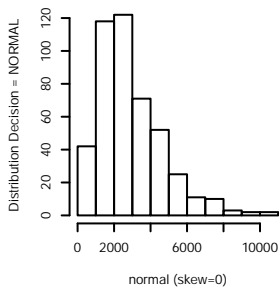

M3\_cysteine

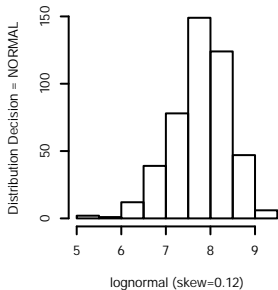

M3\_threonic\_acid

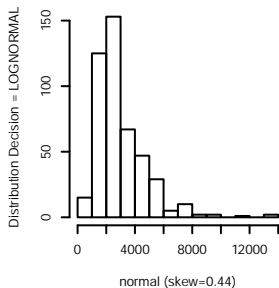

M3\_threonic\_acid

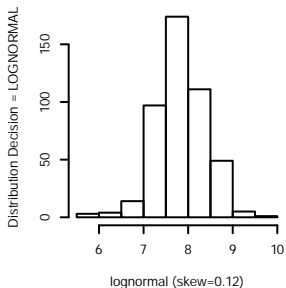

M3\_caprylic\_acid

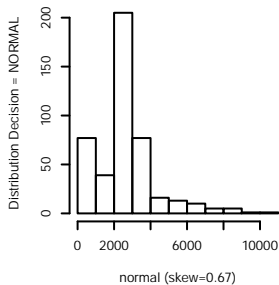

M3\_caprylic\_acid

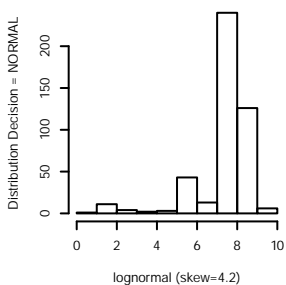

M3\_aspartic\_acid

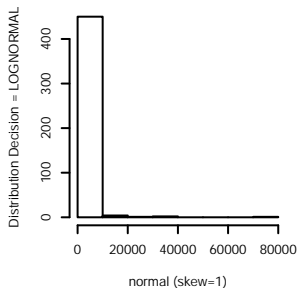

M3\_aspartic\_acid

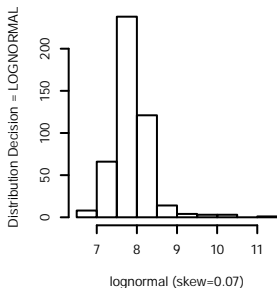

M3\_hydroxyproline

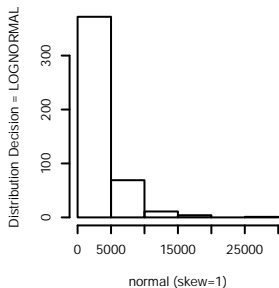

M3\_hydroxyproline

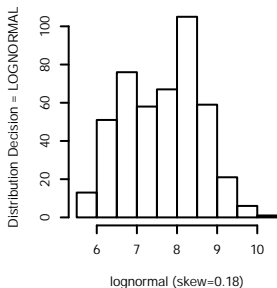

M3\_fucose\_\_rhamnose

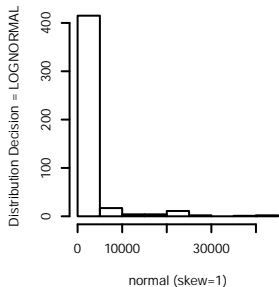

M3\_fucose\_\_rhamnose

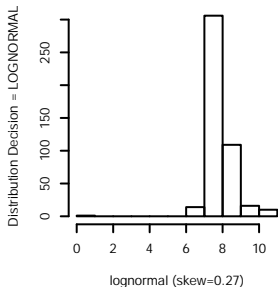

M3\_ethanolamine

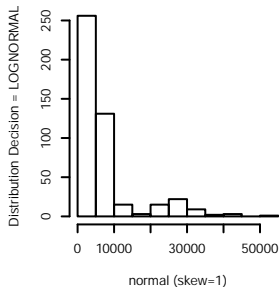

M3\_ethanolamine

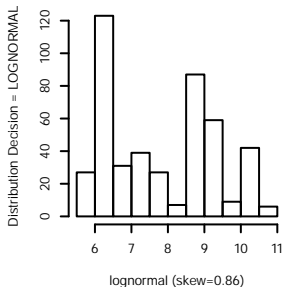

M3\_\_deoxyerythritol\_nist

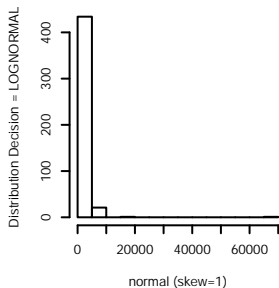

M3\_\_deoxyerythritol\_nist

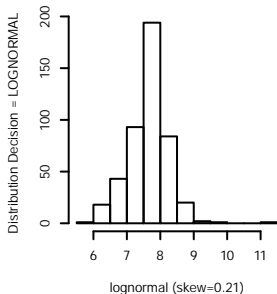

M3\_parabanic\_acid\_nist

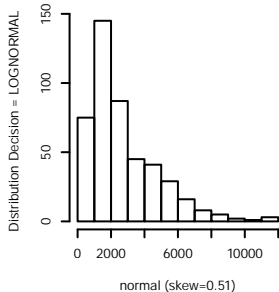

M3\_parabanic\_acid\_nist

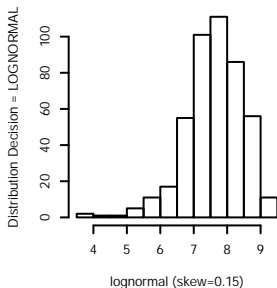

M3\_citrulline

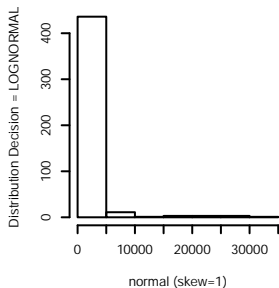

M3\_citrulline

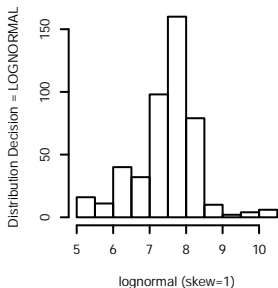

M3\_xylose

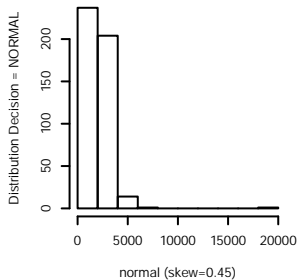

M3\_xylose

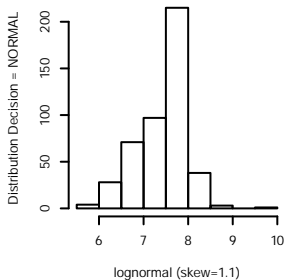



M3\_isothreonic\_acid

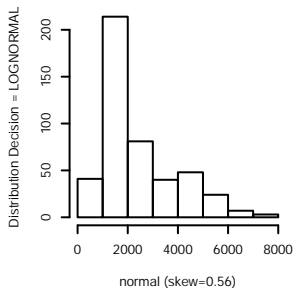

M3\_isothreonic\_acid

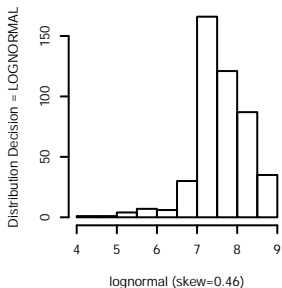

M3\_pyruvic\_acid

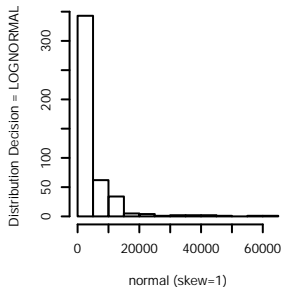

M3\_pyruvic\_acid

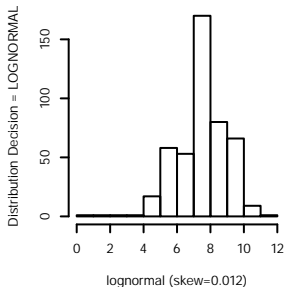

M3\_heptadecanoic\_acid\_nist

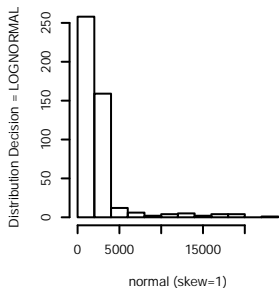

M3\_heptadecanoic\_acid\_nist

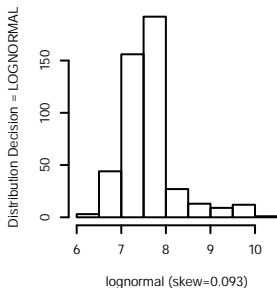

M3\_indole\_3\_acetate

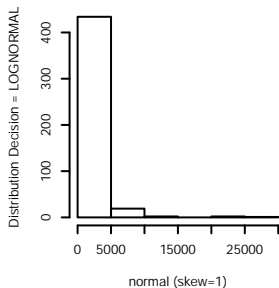

M3\_indole\_3\_acetate

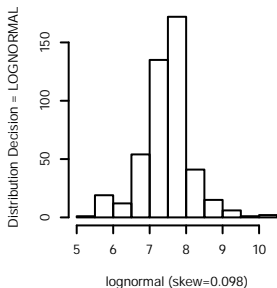

M3\_elaidic\_acid

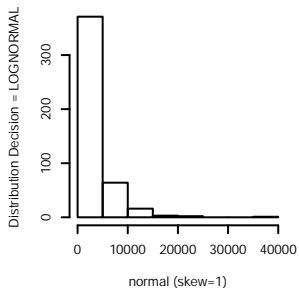

M3\_elaidic\_acid

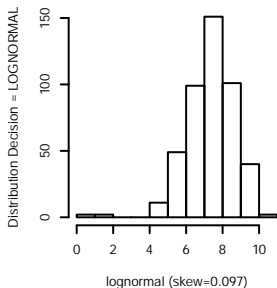

M3\_arachidonic\_acid

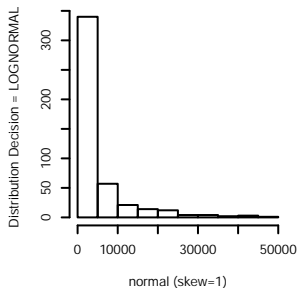

M3\_arachidonic\_acid

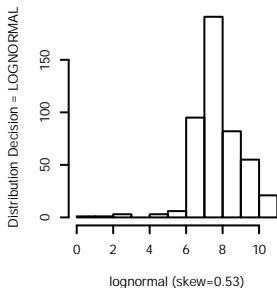

M3\_gamma\_tocopherol

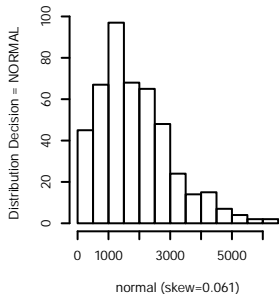

M3\_gamma\_tocopherol

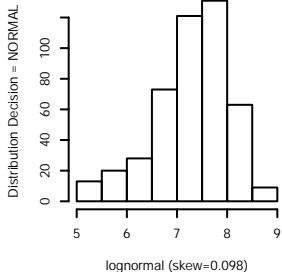

M3\_erythritol

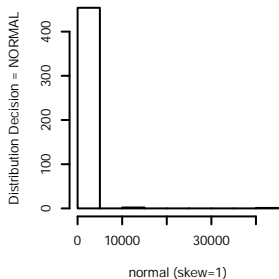

M3\_erythritol

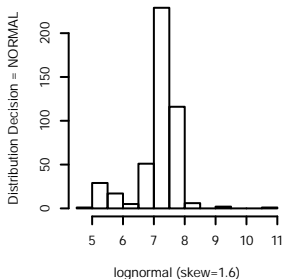

M3\_succinic\_acid

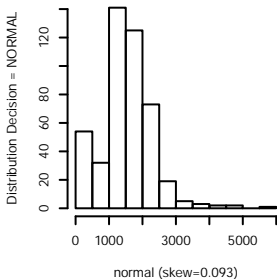

M3\_succinic\_acid

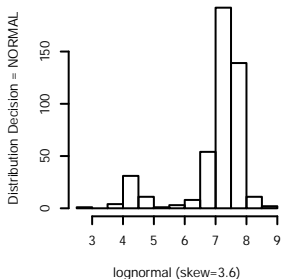

M3\_glycerol\_alpha\_phosphate

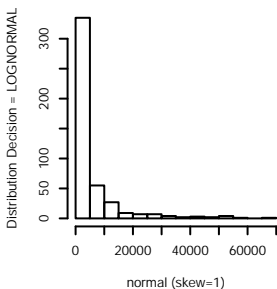

M3\_glycerol\_alpha\_phosphate

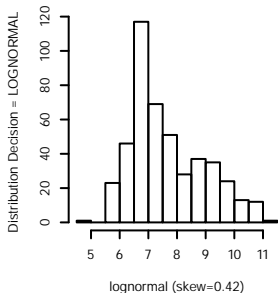

M3\_isocitric\_acid

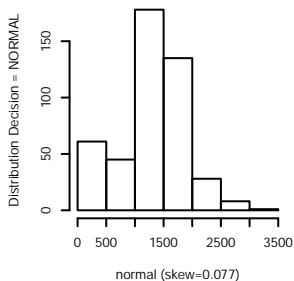

M3\_isocitric\_acid

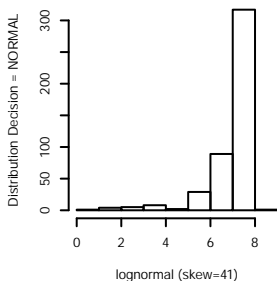

M3\_behenic\_acid

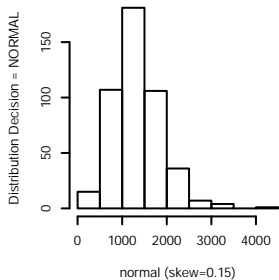

M3\_behenic\_acid

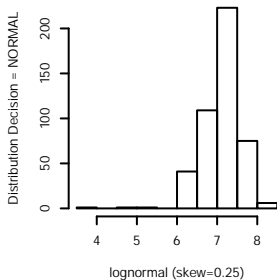

M3\_benzylalcohol

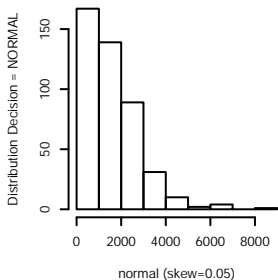

M3\_benzylalcohol

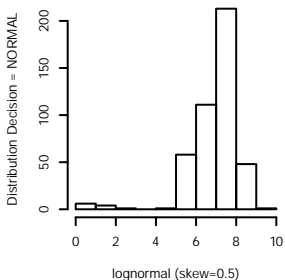

M3\_indole\_3\_lactate

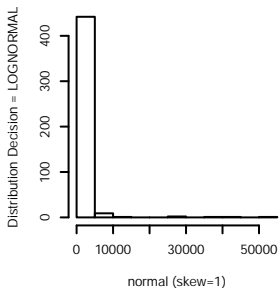

M3\_indole\_3\_lactate

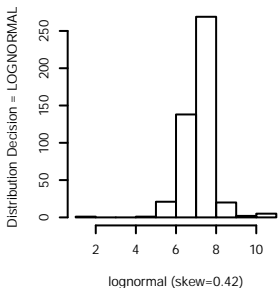

M3\_uracil

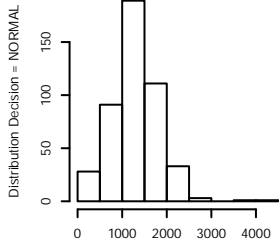

normal (skew=0.033)

M3\_uracil

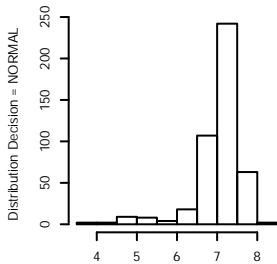

lognormal (skew=0.25)

M3\_methanolphosphate

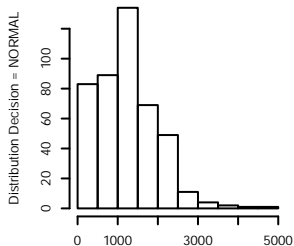

normal (skew=0.17)

M3\_methanolphosphate

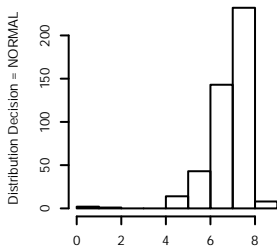

lognormal (skew=1.1)



M3\_glyoxalurea\_nist

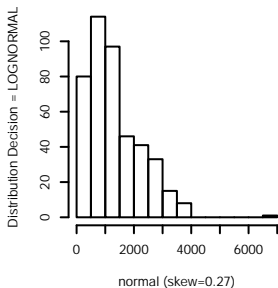

M3\_glyoxalurea\_nist

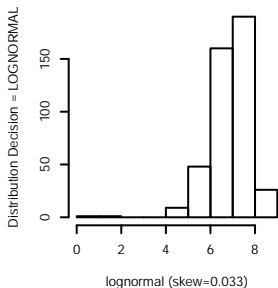

M3\_adipic\_acid

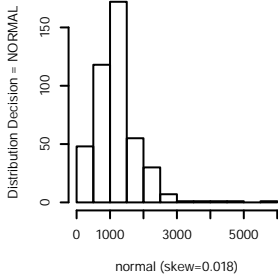

M3\_adipic\_acid

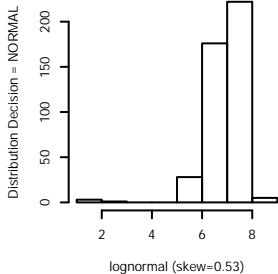

M3\_sorbitol

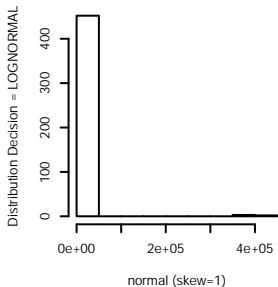

M3\_sorbitol

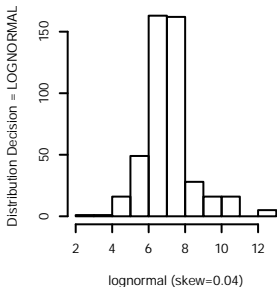

M3\_phosphoethanolamine

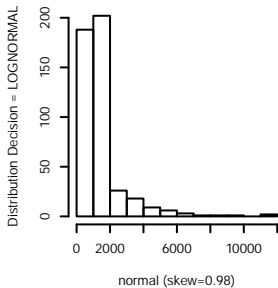

M3\_phosphoethanolamine

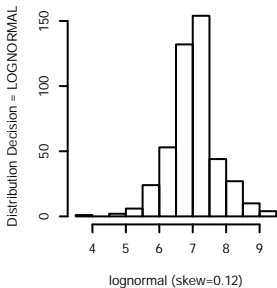

M3\_trans\_4\_hydroxyproline

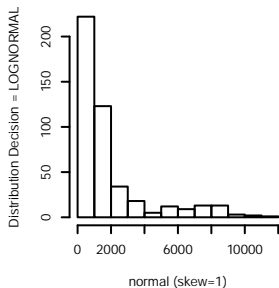

M3\_trans\_4\_hydroxyproline

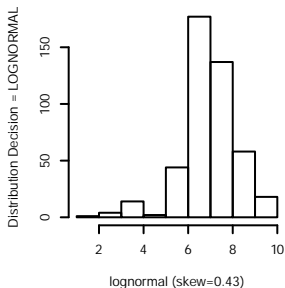

M3\_glucuronic\_acid

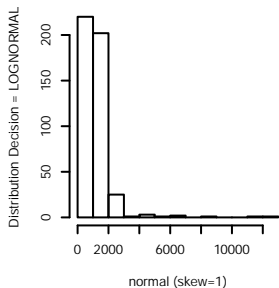

M3\_glucuronic\_acid

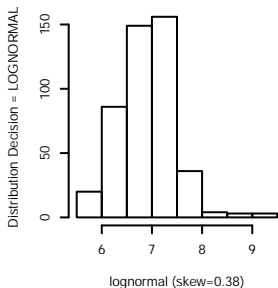

M3\_maleimide

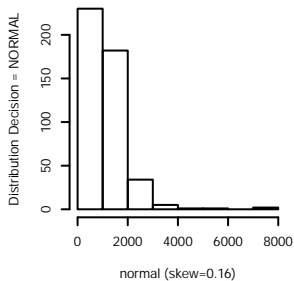

M3\_maleimide

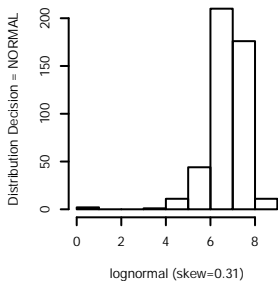

M3\_lignoceric\_acid

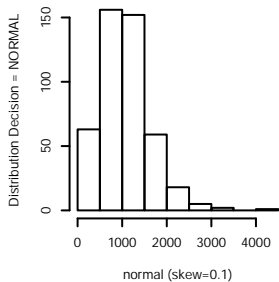

M3\_lignoceric\_acid

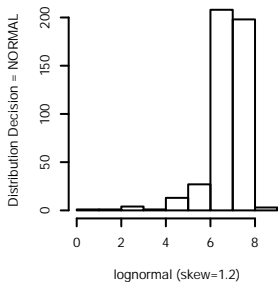

M3\_propane\_1\_3\_diol\_nist

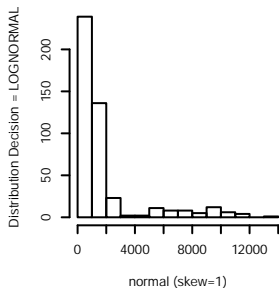

M3\_propane\_1\_3\_diol\_nist

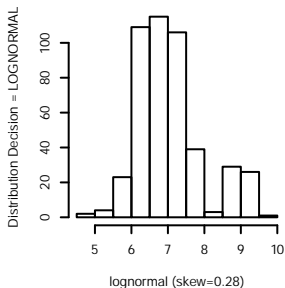

M3\_propane\_1\_2\_3\_tricarboxylate\_nis

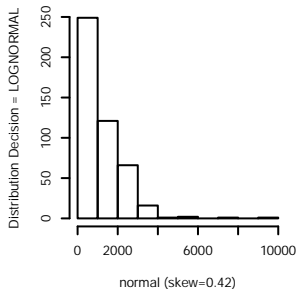

M3\_propane\_1\_2\_3\_tricarboxylate\_nis

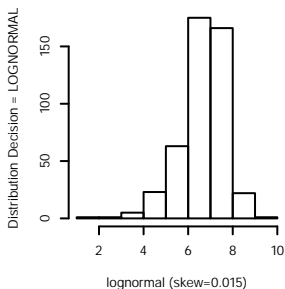

M3\_hydroxyglutaric\_acid

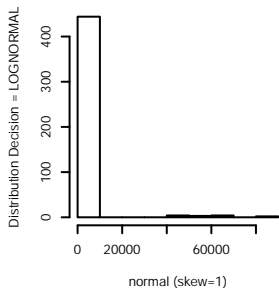

M3\_hydroxyglutaric\_acid

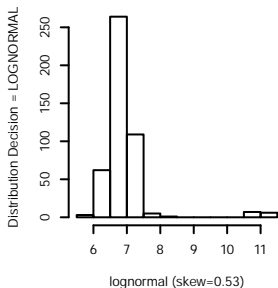

M3\_hypoxanthine

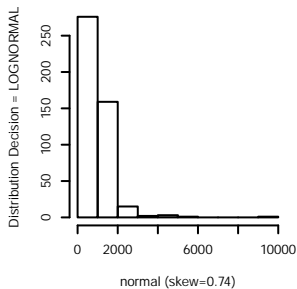

M3\_hypoxanthine

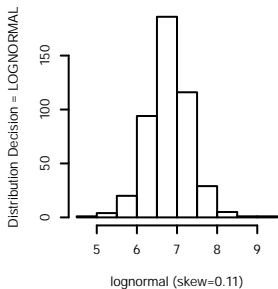

M3\_gluconic\_acid

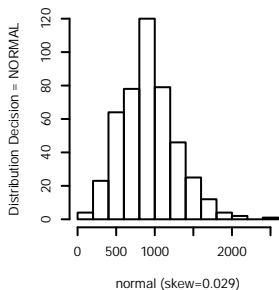

M3\_gluconic\_acid

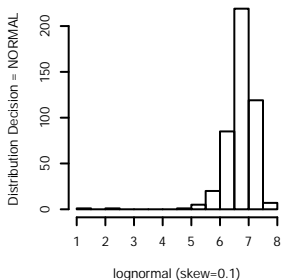

M3\_shikimic\_acid

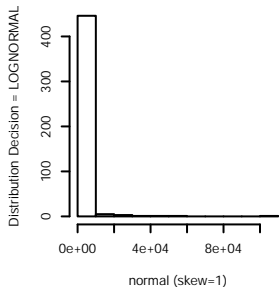

M3\_shikimic\_acid

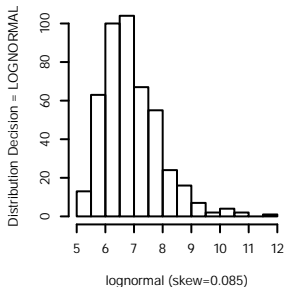

M3\_ribitol

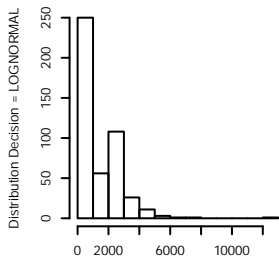

normal (skew=0.86)

M3\_ribitol

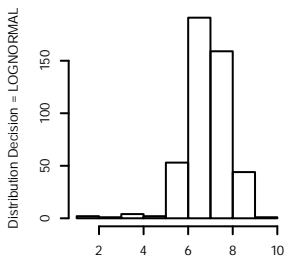

lognormal (skew=0.34)

M3\_galactonic\_acid

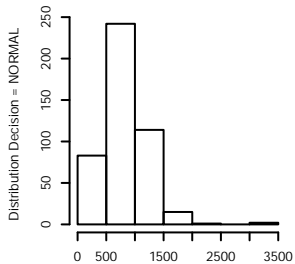

normal (skew=0.095)

M3\_galactonic\_acid

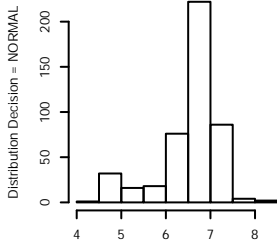

lognormal (skew=0.68)



M3\_glucose\_1\_phosphate

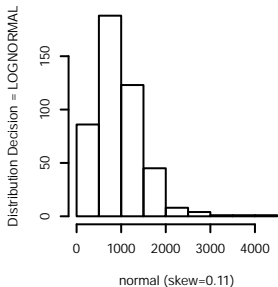

M3\_glucose\_1\_phosphate

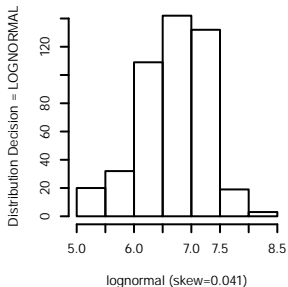

M3\_arabinose

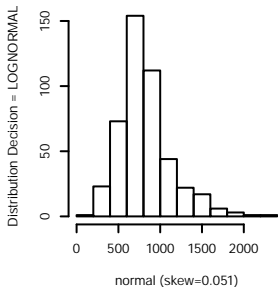

M3\_arabinose

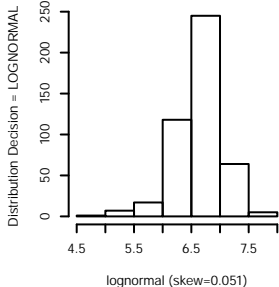

M3\_malic\_acid

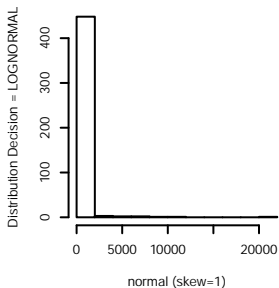

M3\_malic\_acid

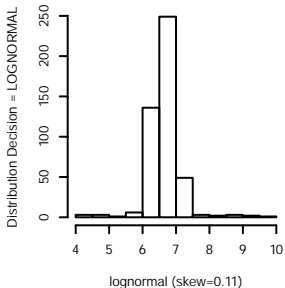

M3\_maltose

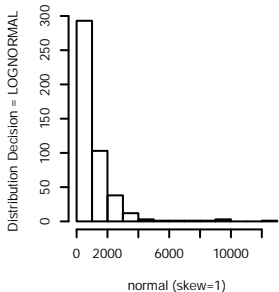

M3\_maltose

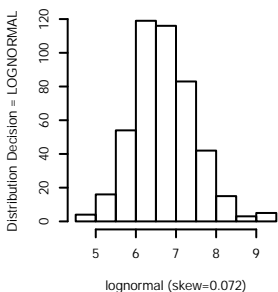

M3\_alloxanoic\_acid

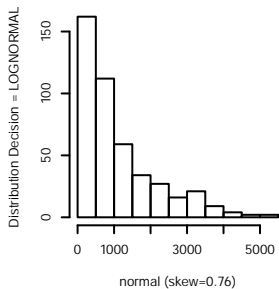

M3\_alloxanoic\_acid

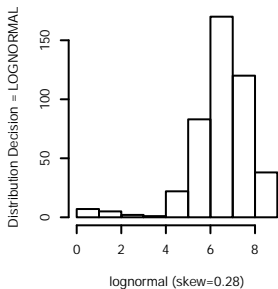

M3\_dihydroabiatic\_acid

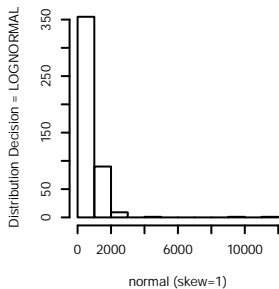

M3\_dihydroabiatic\_acid

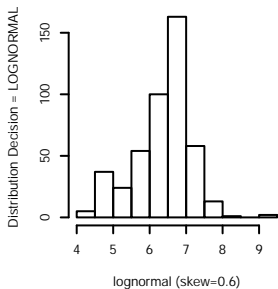

M3\_trehalose

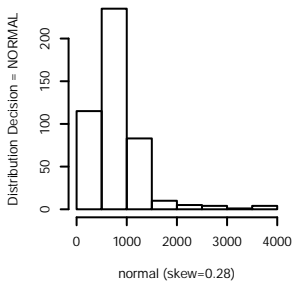

M3\_trehalose

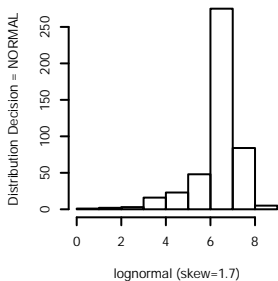

M3\_threitol

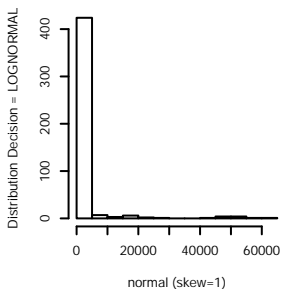

M3\_threitol

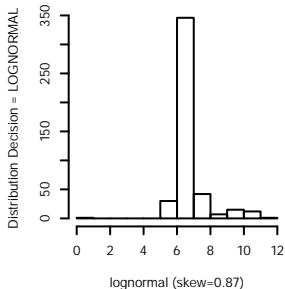

M3\_dodecane

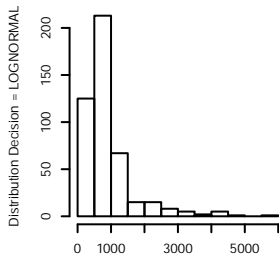

M3\_dodecane

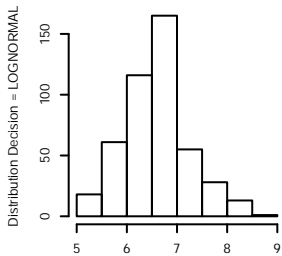

M3\_levoglucosan

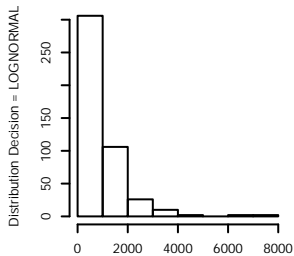

M3\_levoglucosan

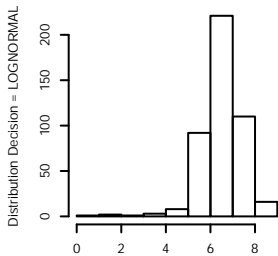

M3\_4\_diaminobutyric\_acid

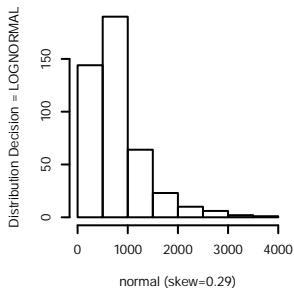

M3\_4\_diaminobutyric\_acid

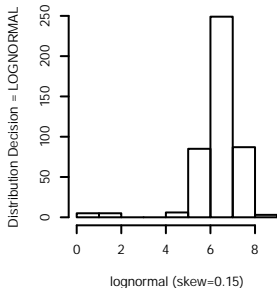

M3\_fumaric\_acid

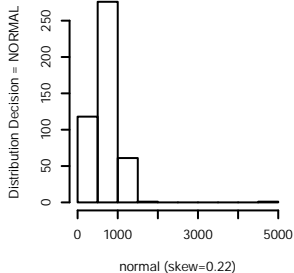

M3\_fumaric\_acid

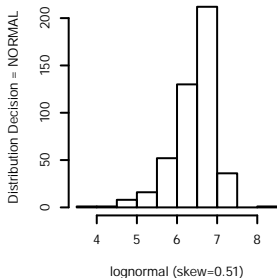

M3\_hydroxycarbamate\_nist

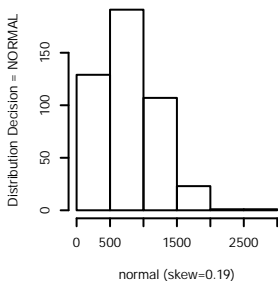

M3\_hydroxycarbamate\_nist

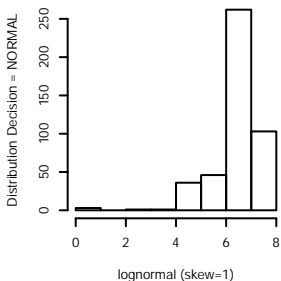

M3\_tartaric\_acid

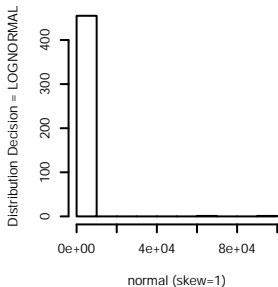

M3\_tartaric\_acid

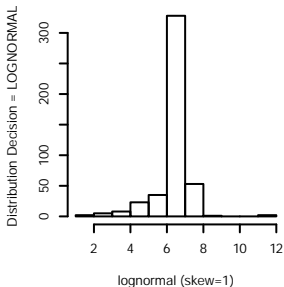

M3\_octadecanol

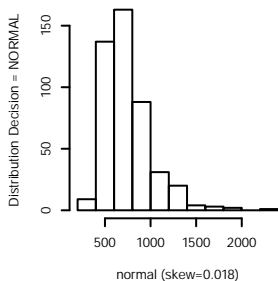

M3\_octadecanol

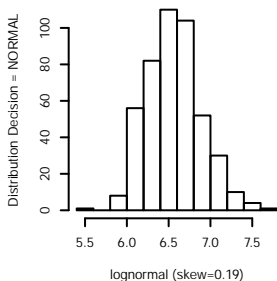

M3\_glycero\_guloheptose\_nist

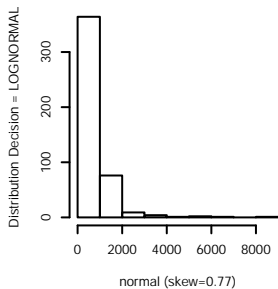

M3\_glycero\_guloheptose\_nist

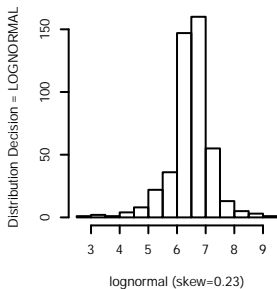



M3\_conduritol\_beta\_epoxide

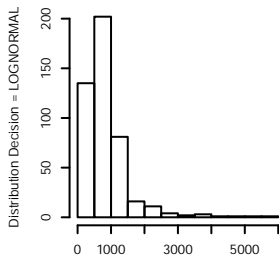

normal (skew=0.76)

M3\_conduritol\_beta\_epoxide

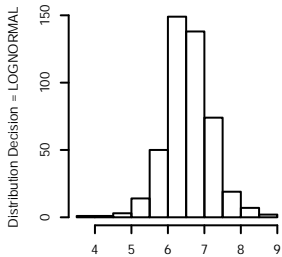

lognormal (skew=0.17)

M3\_putrescine

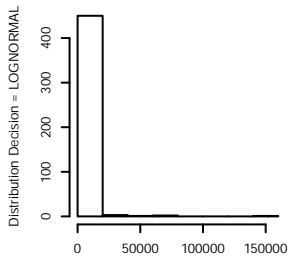

normal (skew=1)

M3\_putrescine

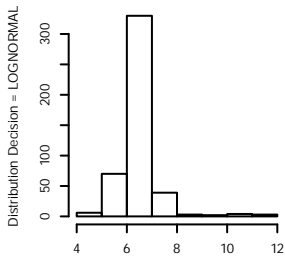

lognormal (skew=1)

M3\_hexadecanol

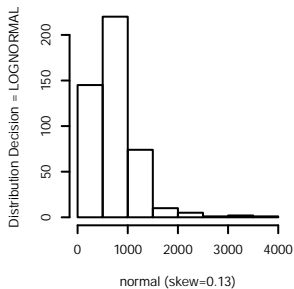

M3\_hexadecanol

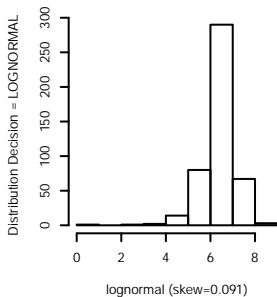

M3\_salicylic\_acid

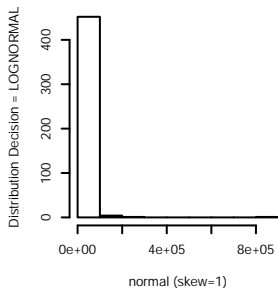

M3\_salicylic\_acid

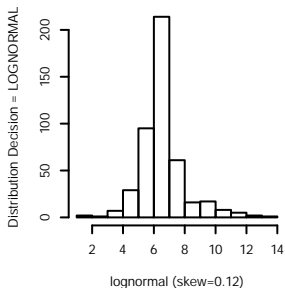

M3\_phytol

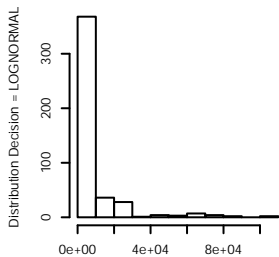

M3\_phytol

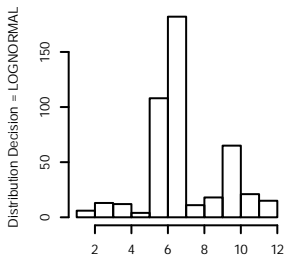

M3\_xylitol

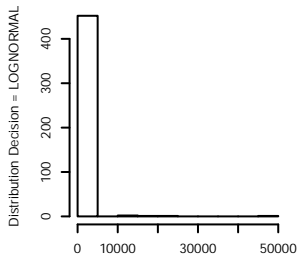

M3\_xylitol

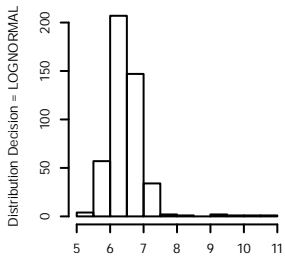

M3\_glycerol\_3\_galactoside

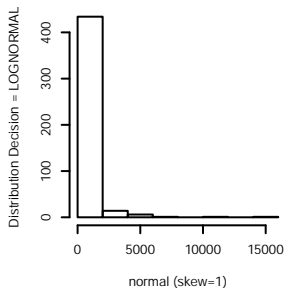

M3\_glycerol\_3\_galactoside

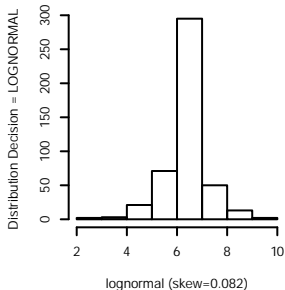

M3\_pyrrole\_2\_carboxylic\_acid

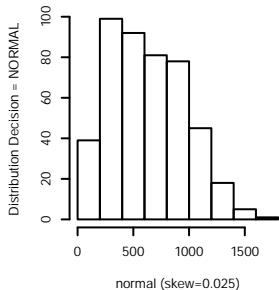

M3\_pyrrole\_2\_carboxylic\_acid

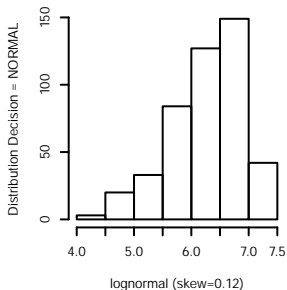

M3\_alpha\_ketoglutaric\_acid

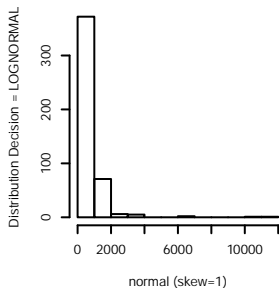

M3\_alpha\_ketoglutaric\_acid

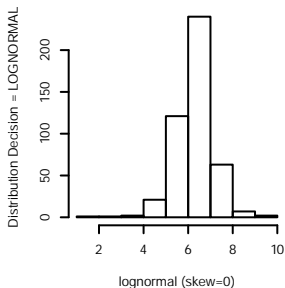

M3\_deoxytetriconic\_acid

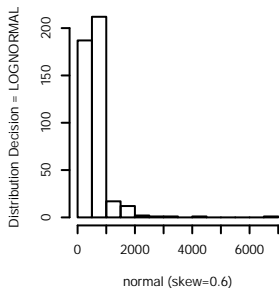

M3\_deoxytetriconic\_acid

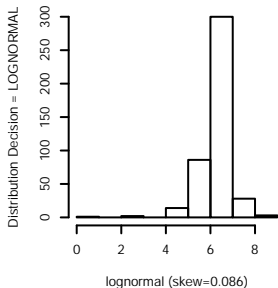

M3\_monostearin

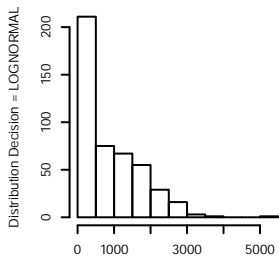

M3\_monostearin

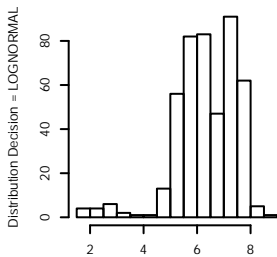

M3\_dodecanol

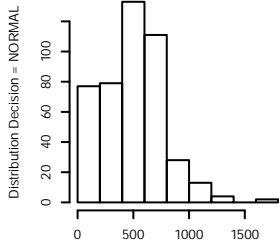

M3\_dodecanol

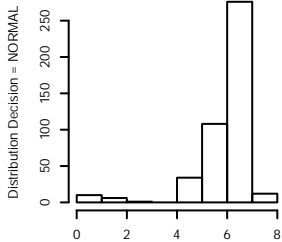

M3\_gaba

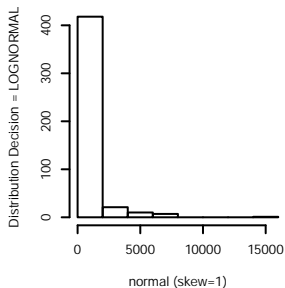

M3\_gaba

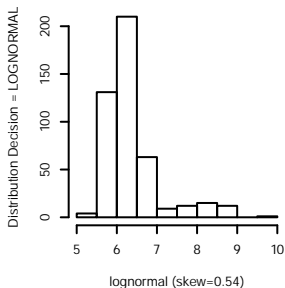

M3\_trihydroxypyrazine\_nist

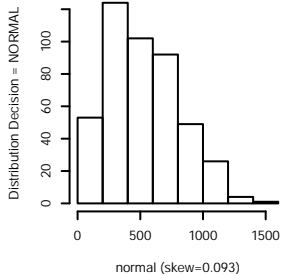

M3\_trihydroxypyrazine\_nist

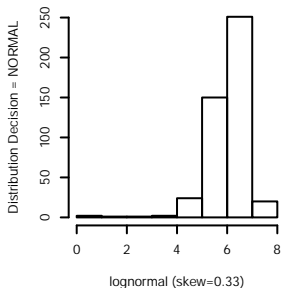

M3\_terephthalic\_acid

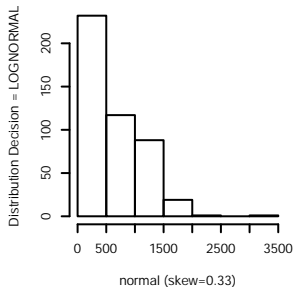

M3\_terephthalic\_acid

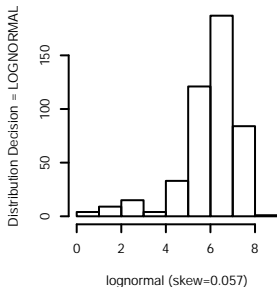

M3\_ribonic\_acid

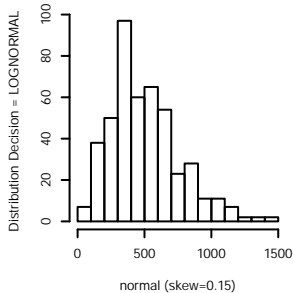

M3\_ribonic\_acid

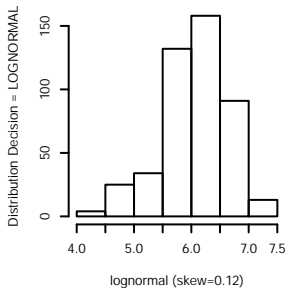



M3\_methoxytryptamine

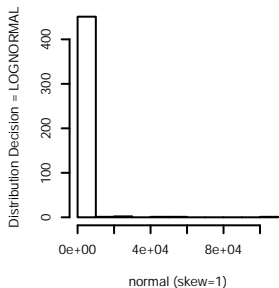

M3\_methoxytryptamine

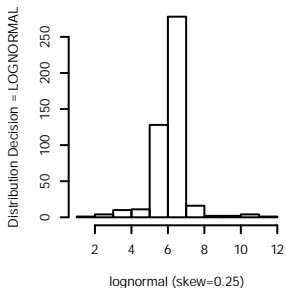

M3\_biuret

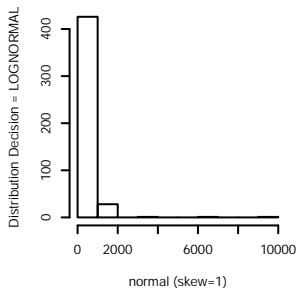

M3\_biuret

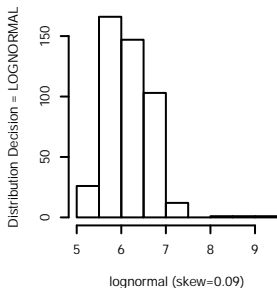

M3\_triethanolamine

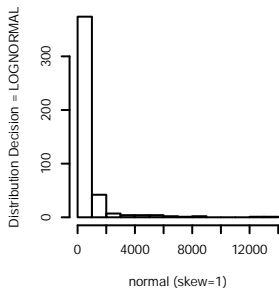

M3\_triethanolamine

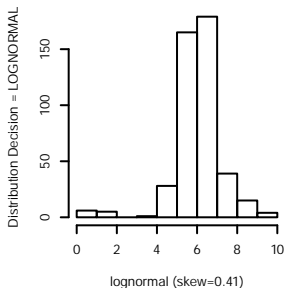

M3\_inulobiose

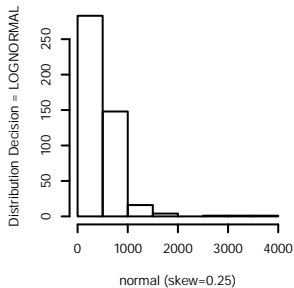

M3\_inulobiose

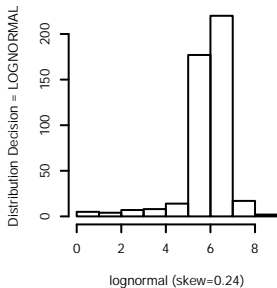

M3\_cellobiotol

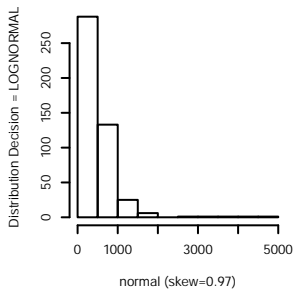

M3\_cellobiotol

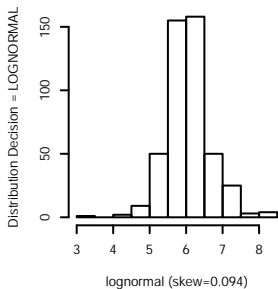

M3\_kynurenine

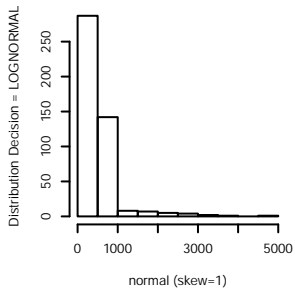

M3\_kynurenine

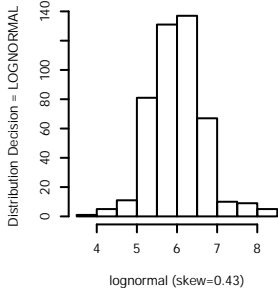

M3\_\_monopalmitin

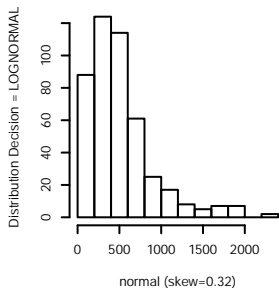

M3\_\_monopalmitin

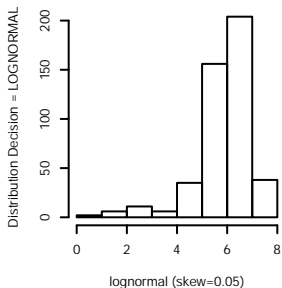

M3\_udp\_glucuronic\_acid

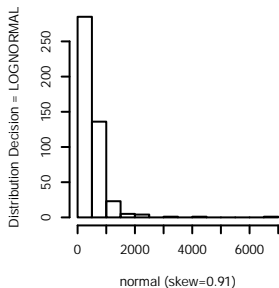

M3\_udp\_glucuronic\_acid

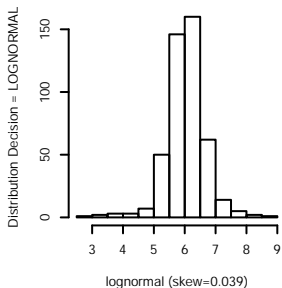

M3\_inositol\_allo\_

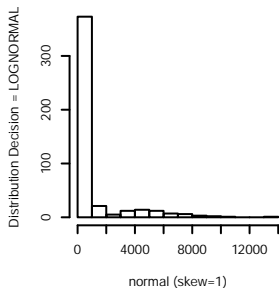

M3\_inositol\_allo\_

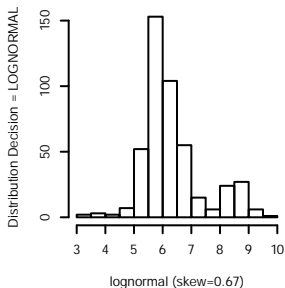

M3\_uridine

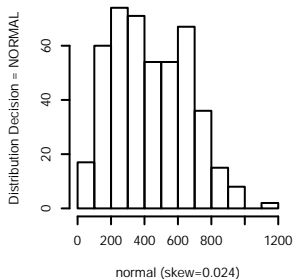

M3\_uridine

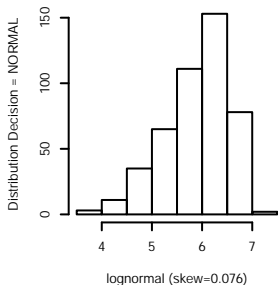

M3\_aminoisobutyric\_acid

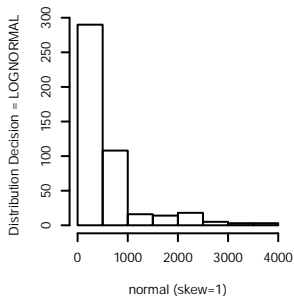

M3\_aminoisobutyric\_acid

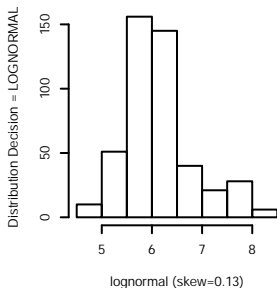

M3\_pyrophosphate

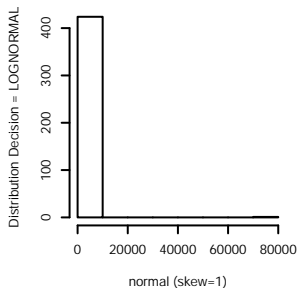

M3\_pyrophosphate

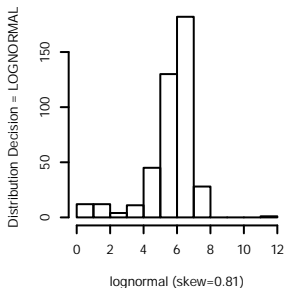

M3\_tocopherol\_beta\_nist

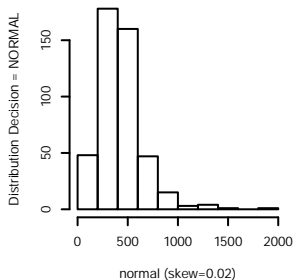

M3\_tocopherol\_beta\_nist

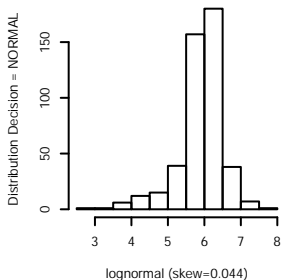

M3\_3\_dihydroxybutanoic\_acid\_nist

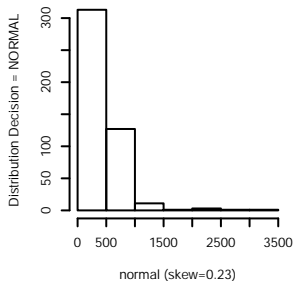

M3\_3\_dihydroxybutanoic\_acid\_nist

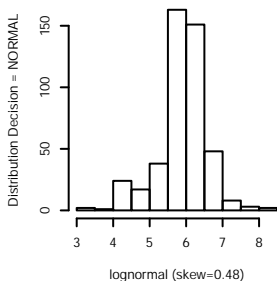

M3\_hydroxynorvaline\_nist

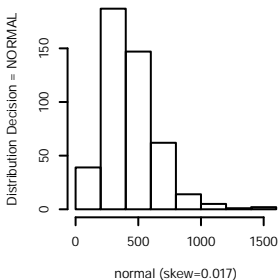

M3\_hydroxynorvaline\_nist

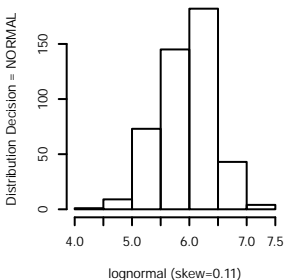

M3\_glycyl\_proline

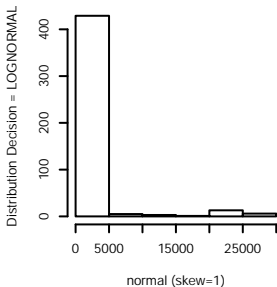

M3\_glycyl\_proline

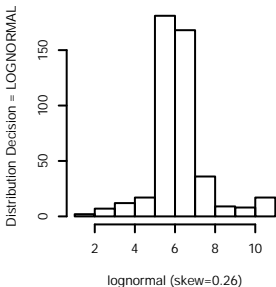



M3\_enolpyruvate\_nist

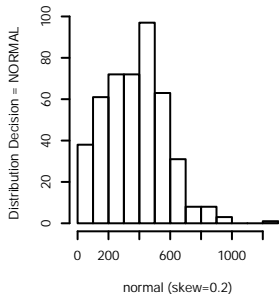

M3\_enolpyruvate\_nist

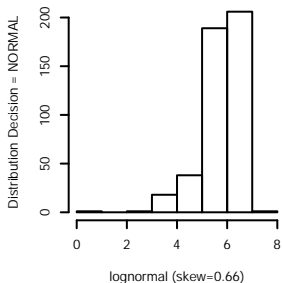

M3\_pyrazine\_2\_5\_dihydroxy\_nist

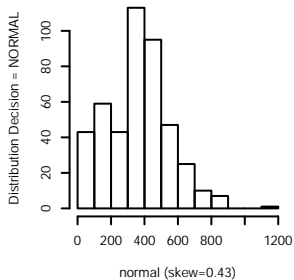

M3\_pyrazine\_2\_5\_dihydroxy\_nist

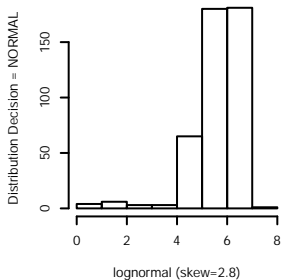

M3\_sucrose

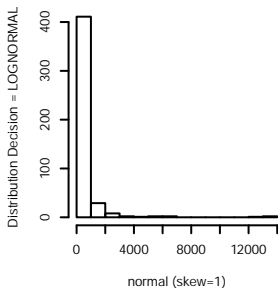

M3\_sucrose

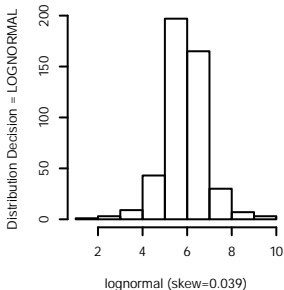

M3\_beta\_glycerolphosphate

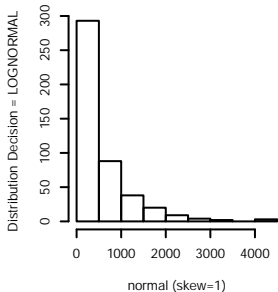

M3\_beta\_glycerolphosphate

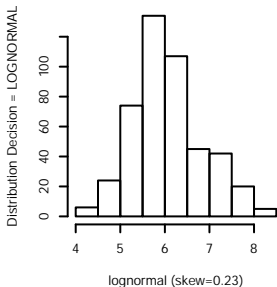

M3\_hydroxybutyric\_acid

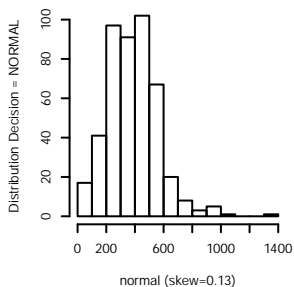

M3\_hydroxybutyric\_acid

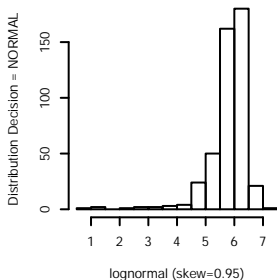

M3\_phosphoglycerate

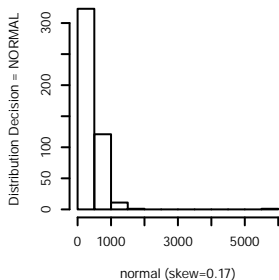

M3\_phosphoglycerate

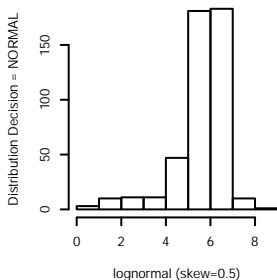

M3\_n\_acetylaspartic\_acid

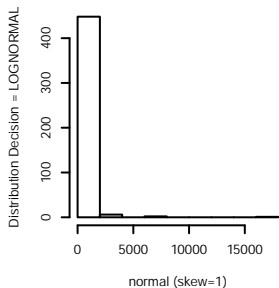

M3\_n\_acetylaspartic\_acid

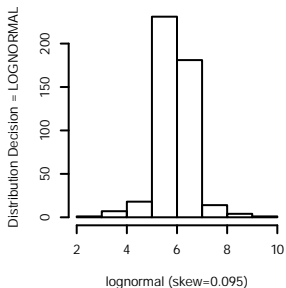

M3\_isobutene\_glycol\_nist

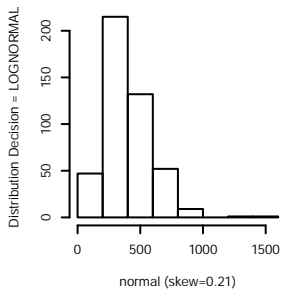

M3\_isobutene\_glycol\_nist

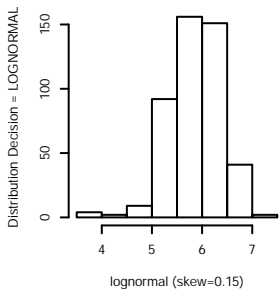

M3\_phenylethylamine

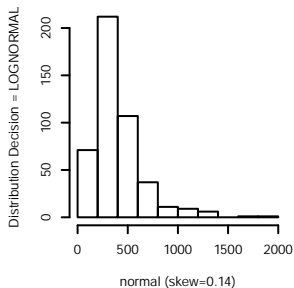

M3\_phenylethylamine

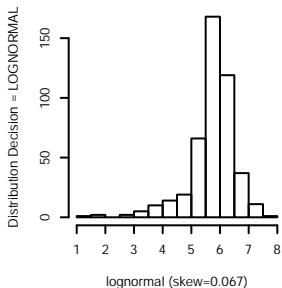

M3\_cysteine\_glycine

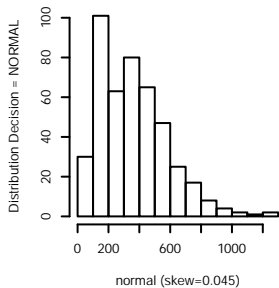

M3\_cysteine\_glycine

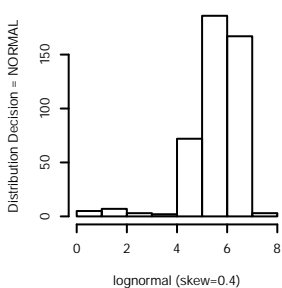

M3\_quinic\_acid

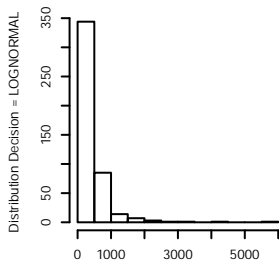

normal (skew=1)

M3\_quinic\_acid

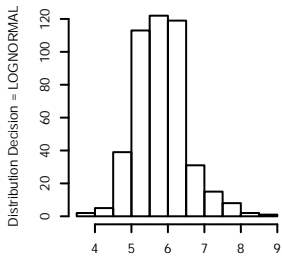

lognormal (skew=0.34)

M3\_arabitol

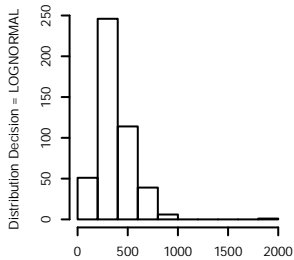

normal (skew=0.26)

M3\_arabitol

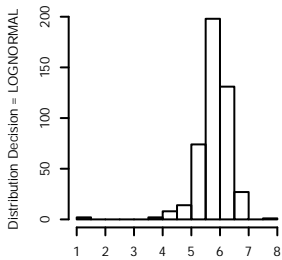

lognormal (skew=0.21)

M3\_pipelicolic\_acid

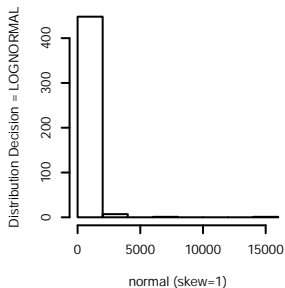

M3\_pipelicolic\_acid

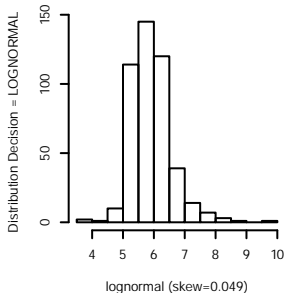

M3\_\_2\_4\_benzenetriol

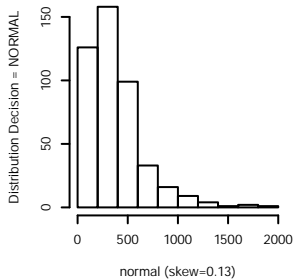

M3\_\_2\_4\_benzenetriol

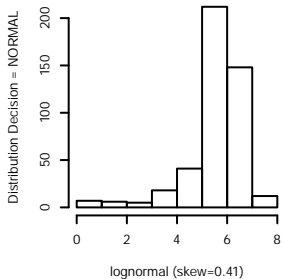

M3\_saccharic\_acid

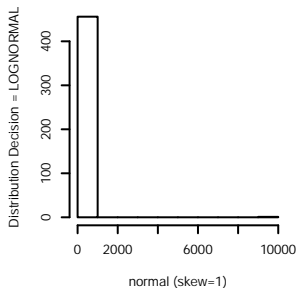

M3\_saccharic\_acid

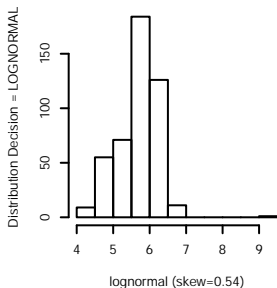

M3\_idonic\_acid\_nist

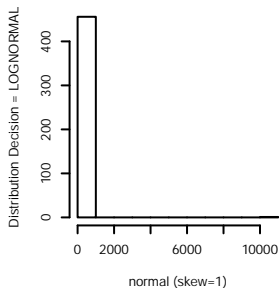

M3\_idonic\_acid\_nist

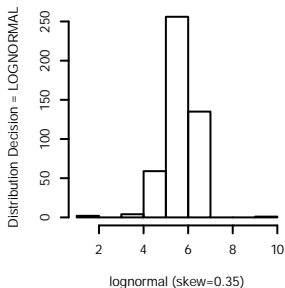



M3\_methoxytyrosine\_nist

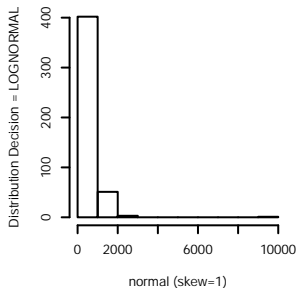

M3\_methoxytyrosine\_nist

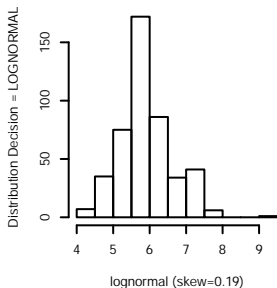

M3\_lactobionic\_acid

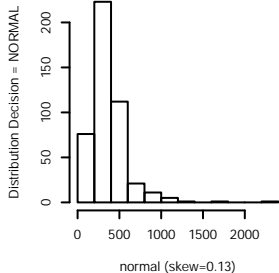

M3\_lactobionic\_acid

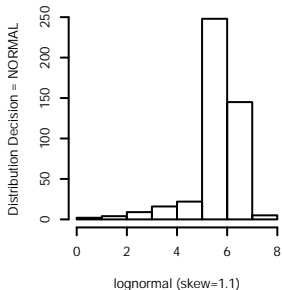

M3\_cellobiose

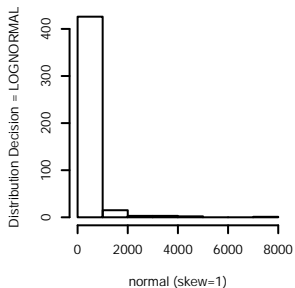

M3\_cellobiose

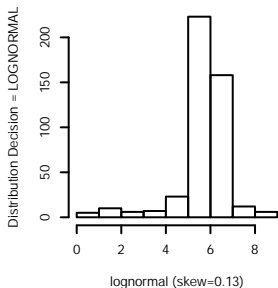

M3\_taurine

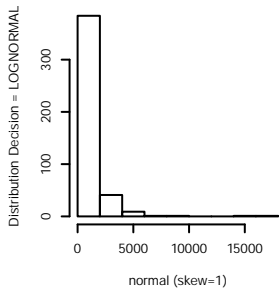

M3\_taurine

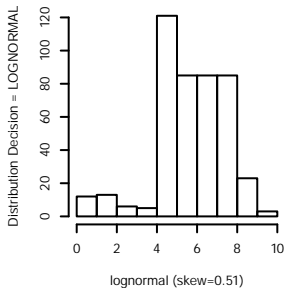

M3\_naproxen

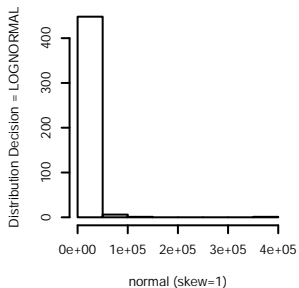

M3\_naproxen

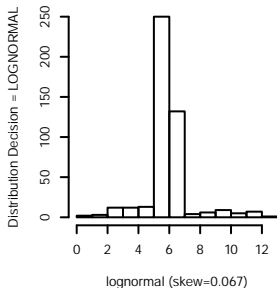

M3\_glutaric\_acid

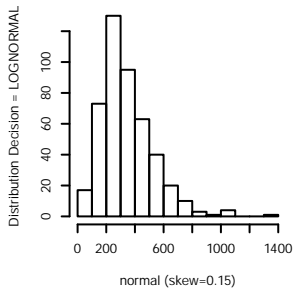

M3\_glutaric\_acid

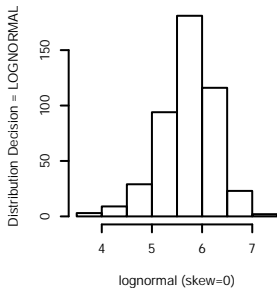

M3\_glycerol\_beta\_phosphate

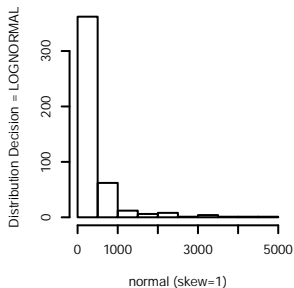

M3\_glycerol\_beta\_phosphate

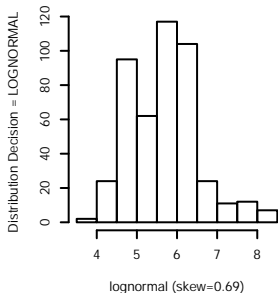

M3\_n\_acetyl\_d\_mannosamine

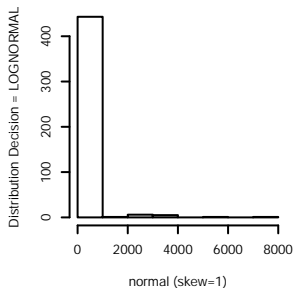

M3\_n\_acetyl\_d\_mannosamine

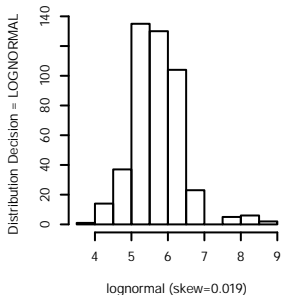

M3\_aconicitic\_acid

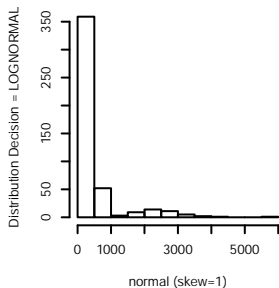

M3\_aconicitic\_acid

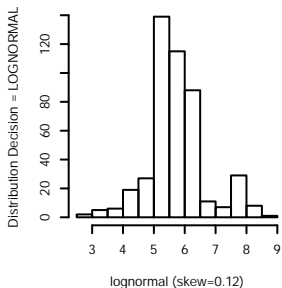

M3\_o\_acetylserine

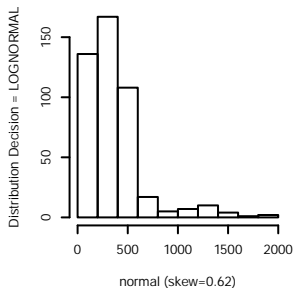

M3\_o\_acetylserine

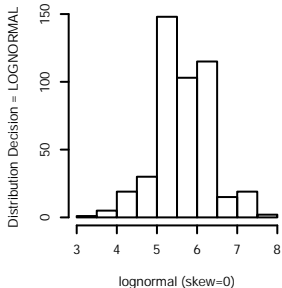

M3\_maltotriose

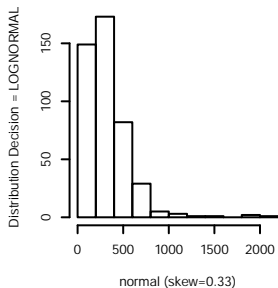

M3\_maltotriose

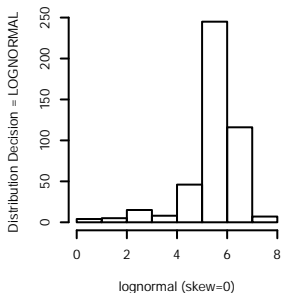

M3\_stigmasterol

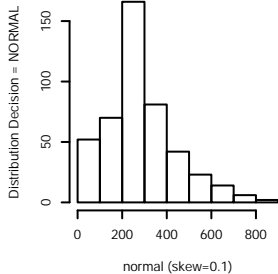

M3\_stigmasterol

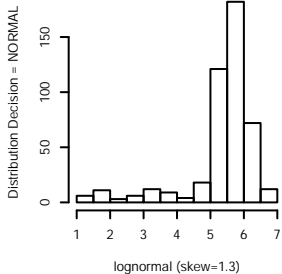

M3\_pyrogallol

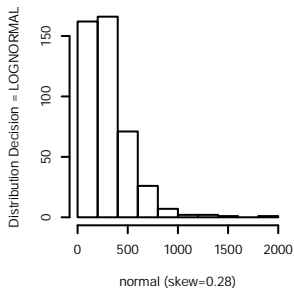

M3\_pyrogallol

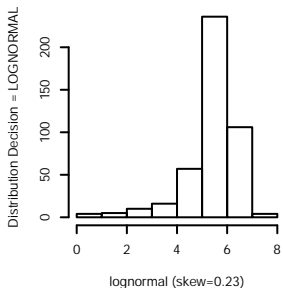

M3\_oxogluconic\_acid\_nist

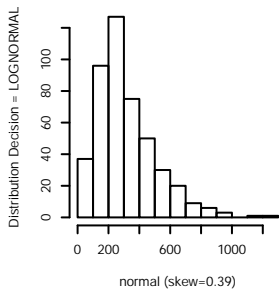

M3\_oxogluconic\_acid\_nist

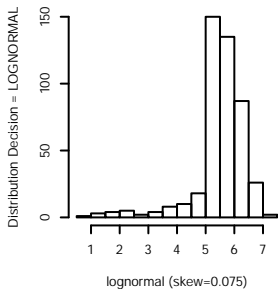

M3\_3\_5\_trihydroxypyrazine\_nist

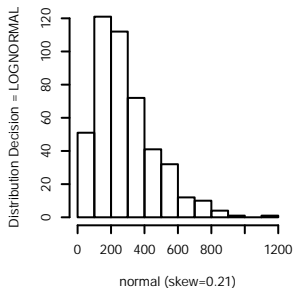

M3\_3\_5\_trihydroxypyrazine\_nist

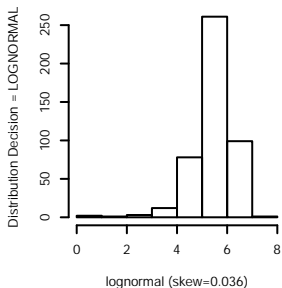

M3\_aminoadipic\_acid

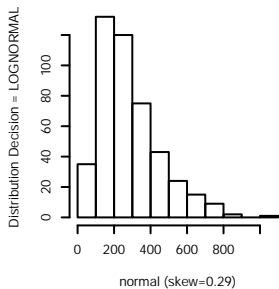

M3\_aminoadipic\_acid

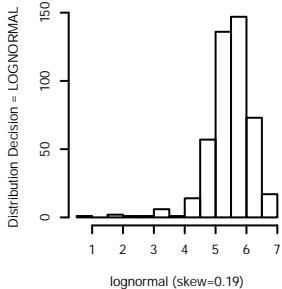



M3\_monopalmitin\_1

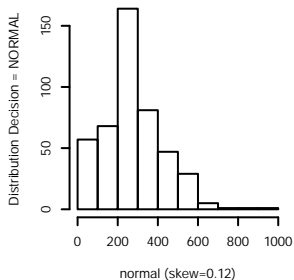

M3\_monopalmitin\_1

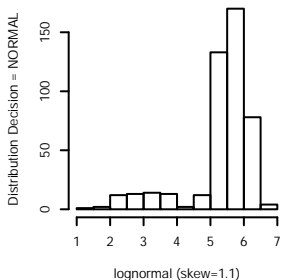

M3\_epsilon\_caprolactam

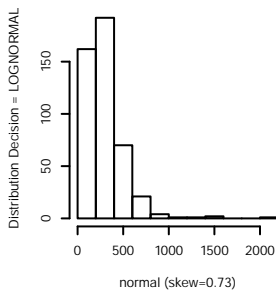

M3\_epsilon\_caprolactam

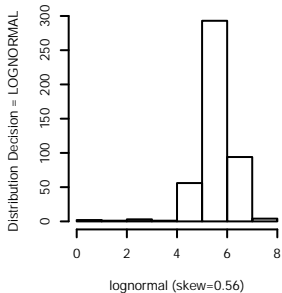

M3\_citramalic\_acid

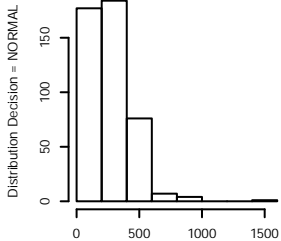

normal (skew=0.048)

M3\_citramalic\_acid

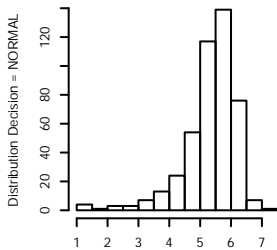

lognormal (skew=0.24)

M3\_beta\_alanine

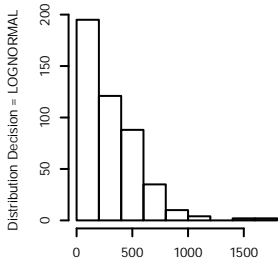

normal (skew=0.77)

M3\_beta\_alanine

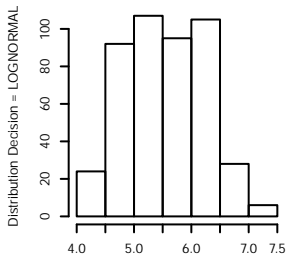

lognormal (skew=0.025)

M3\_azelaic\_acid

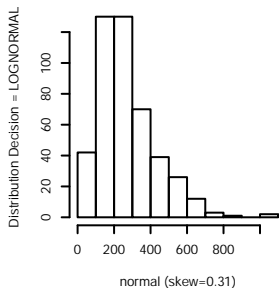

M3\_azelaic\_acid

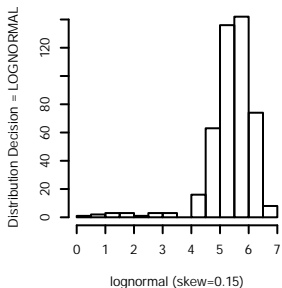

M3\_n\_acetyl\_d\_ tryptophan

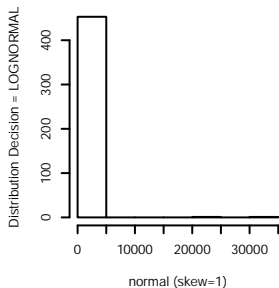

M3\_n\_acetyl\_d\_ tryptophan

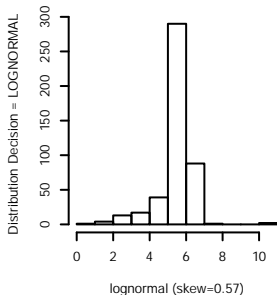

M3\_6\_anhydrogalactose

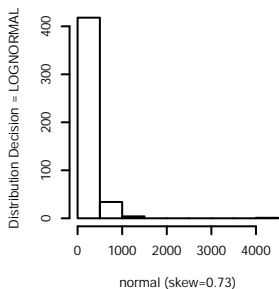

M3\_6\_anhydrogalactose

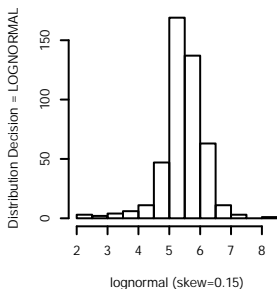

M3\_paracetamol

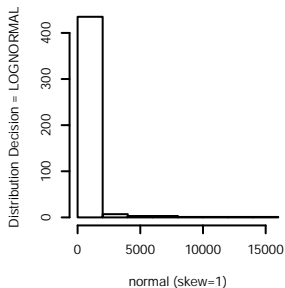

M3\_paracetamol

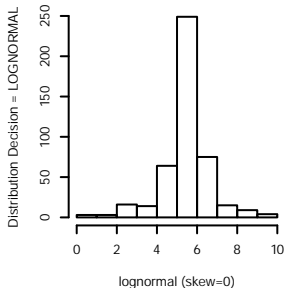

M3\_adenosine\_5\_phosphate

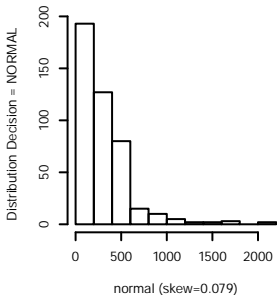

M3\_adenosine\_5\_phosphate

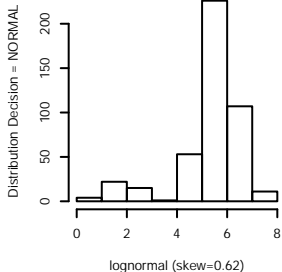

M3\_lathosterol\_nist

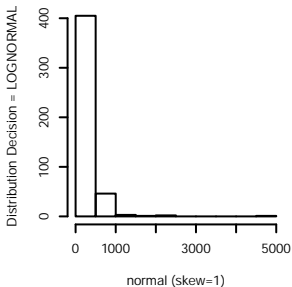

M3\_lathosterol\_nist

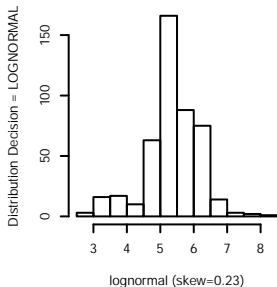

M3\_glucoheptulose

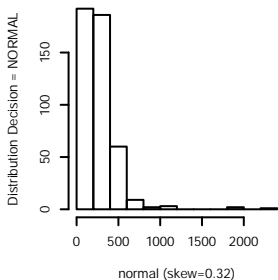

M3\_glucoheptulose

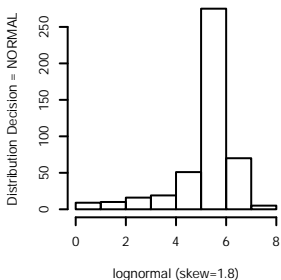

M3\_mevalonic\_acid\_nist

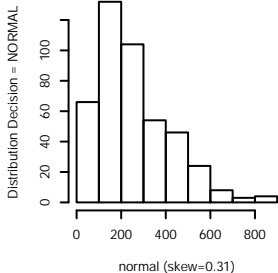

M3\_mevalonic\_acid\_nist

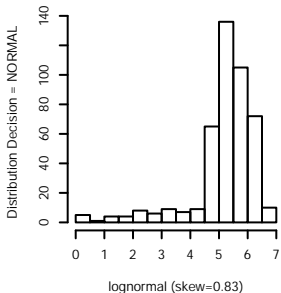

M3\_ribose

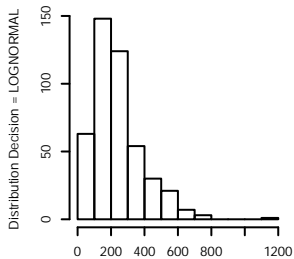

normal (skew=0.18)

M3\_ribose

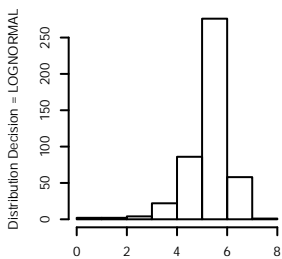

lognormal (skew=0.1)

M3\_chlorogenic\_acid

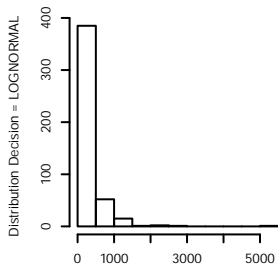

normal (skew=1)

M3\_chlorogenic\_acid

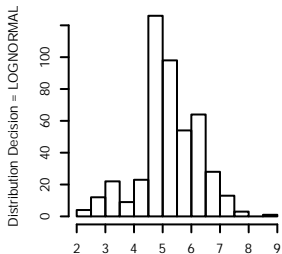

lognormal (skew=0.24)

M3\_allantoic\_acid

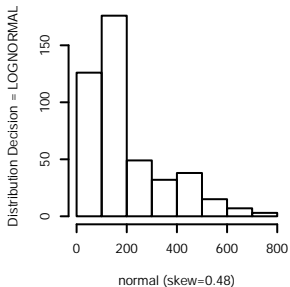

M3\_allantoic\_acid

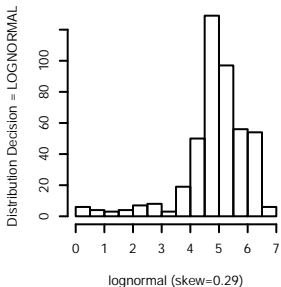

M3\_sophorose

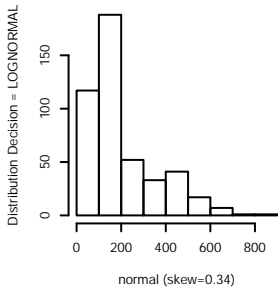

M3\_sophorose

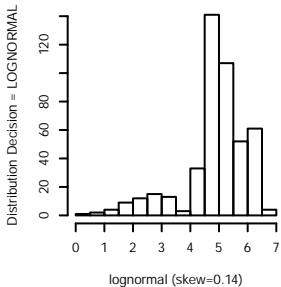



M3\_galactose\_6\_phosphate

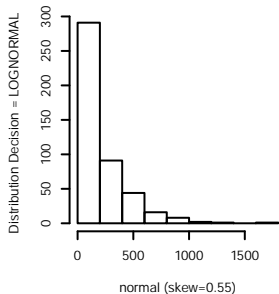

M3\_galactose\_6\_phosphate

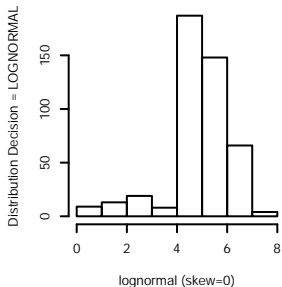

M3\_formononetin

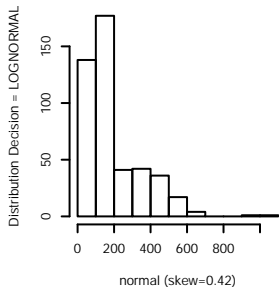

M3\_formononetin

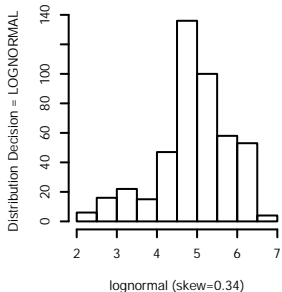

M3\_adenosine

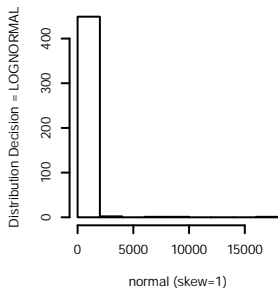

M3\_adenosine

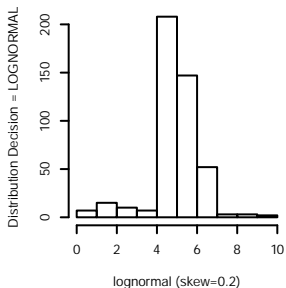

M3\_hydroxyhippuric\_acid

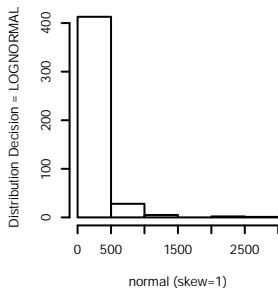

M3\_hydroxyhippuric\_acid

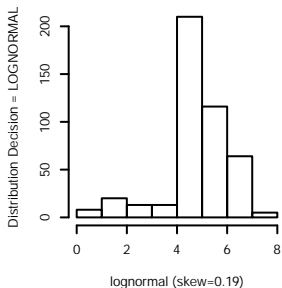

M3\_02571

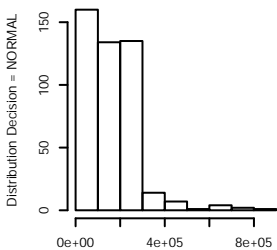

M3\_02571

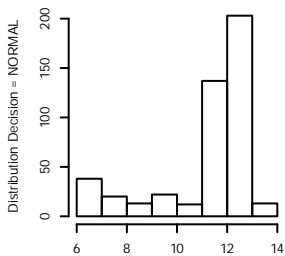

M3\_73067

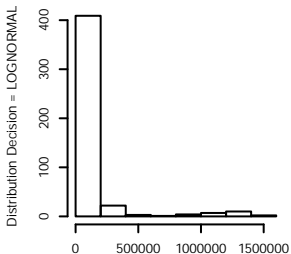

M3\_73067

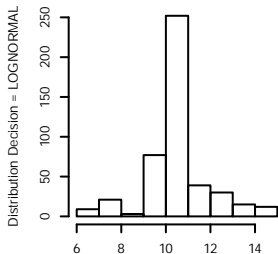

M3\_26842

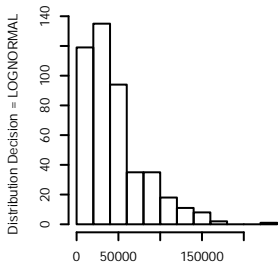

normal (skew=0.47)

M3\_26842

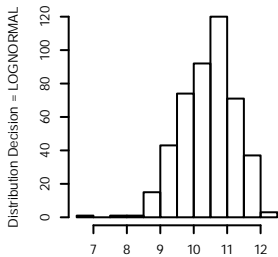

lognormal (skew=0.037)

M3\_60956

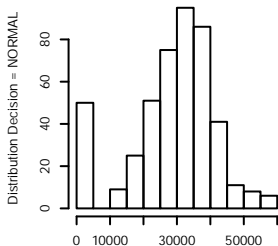

normal (skew=0.17)

M3\_60956

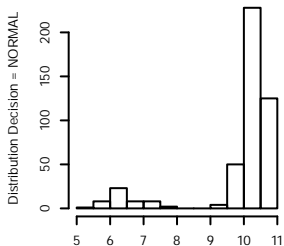

lognormal (skew=Inf)

M3\_99777

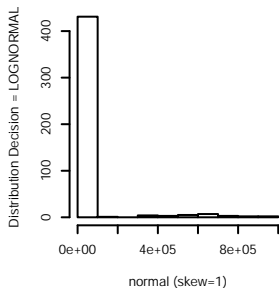

M3\_99777

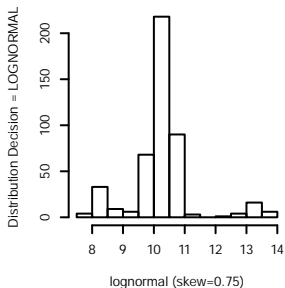

M3\_66628

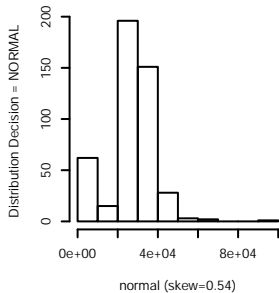

M3\_66628

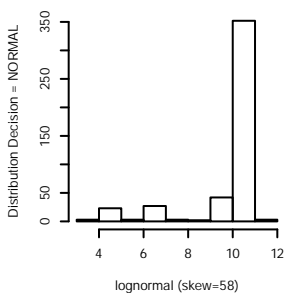

M3\_46067

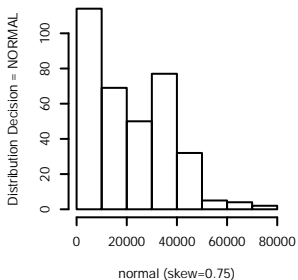

M3\_46067

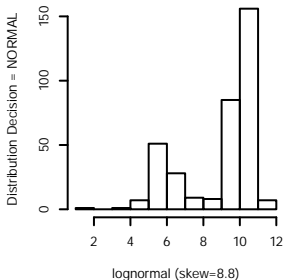

M3\_11972

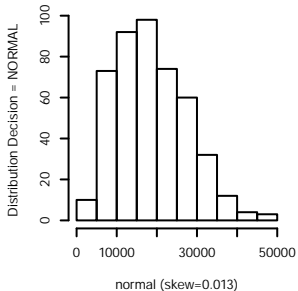

M3\_11972

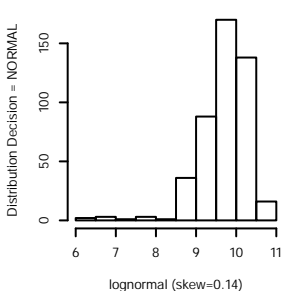

M3\_23186

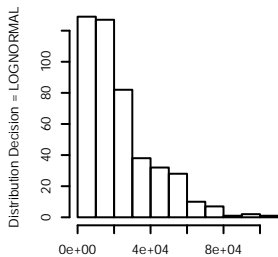

M3\_23186

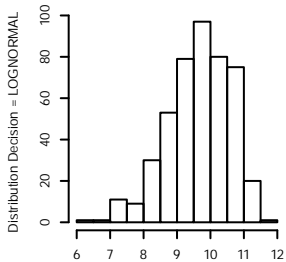

M3\_13253

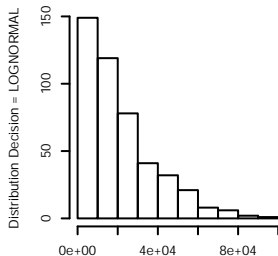

M3\_13253

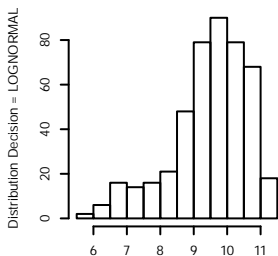

M3\_83390

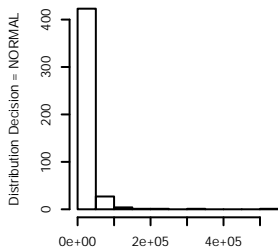

M3\_83390

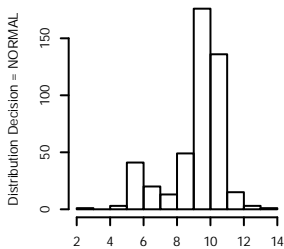

M3\_38109

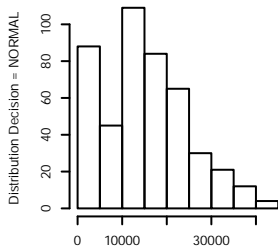

M3\_38109

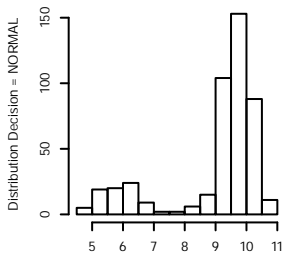



M3\_99773

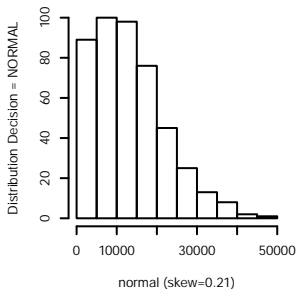

M3\_99773

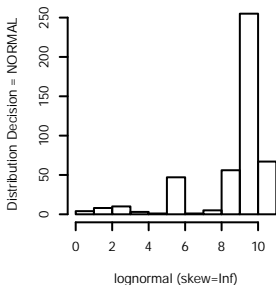

M3\_70066

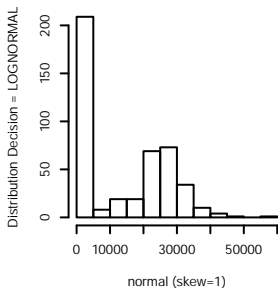

M3\_70066

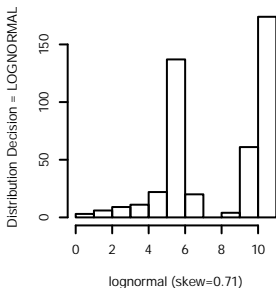

M3\_38061

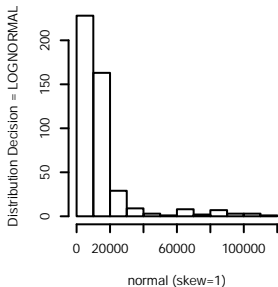

M3\_38061

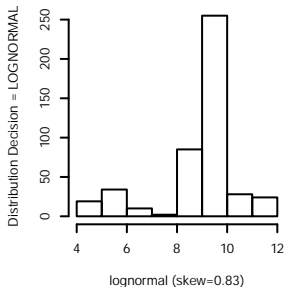

M3\_16629

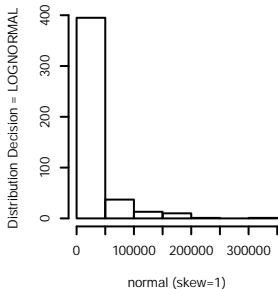

M3\_16629

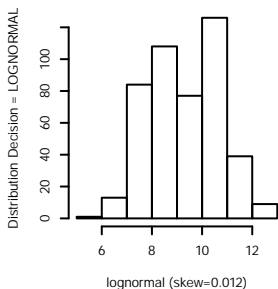

M3\_46628

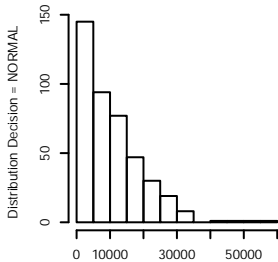

M3\_46628

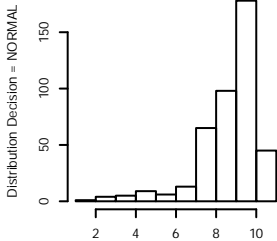

M3\_26841

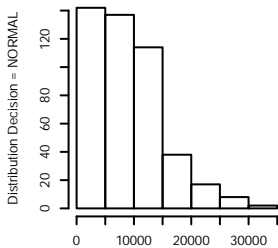

M3\_26841

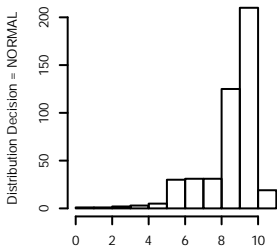

M3\_66268

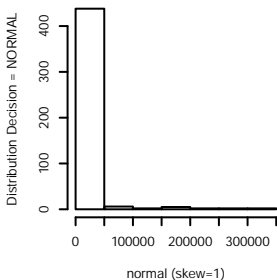

M3\_66268

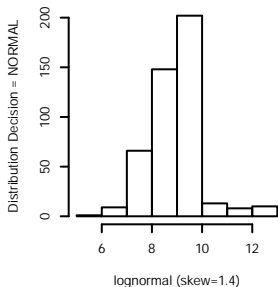

M3\_14770

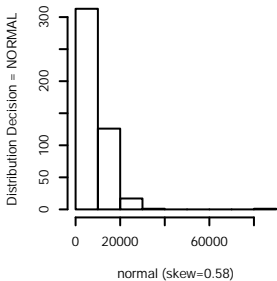

M3\_14770

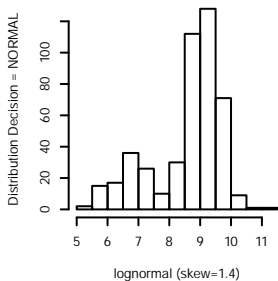

M3\_13972

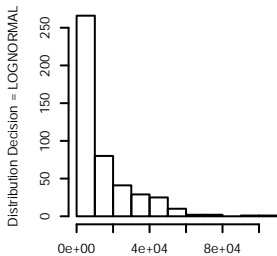

normal (skew=1)

M3\_13972

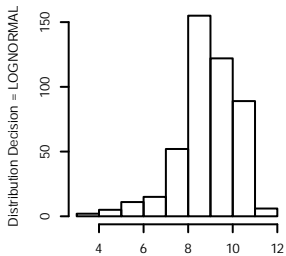

lognormal (skew=0.35)

M3\_85340

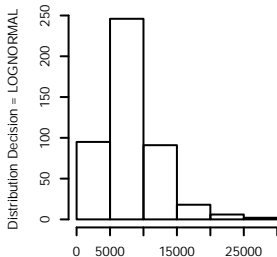

normal (skew=0.25)

M3\_85340

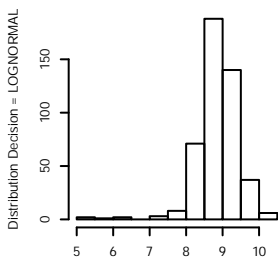

lognormal (skew=0.13)

M3\_26843

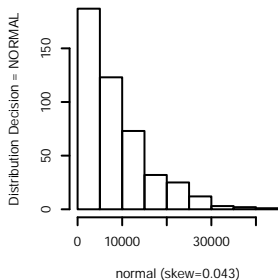

M3\_26843

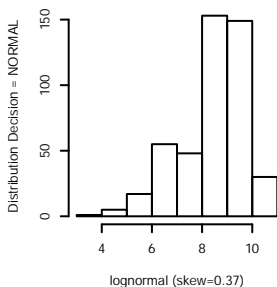

M3\_19168

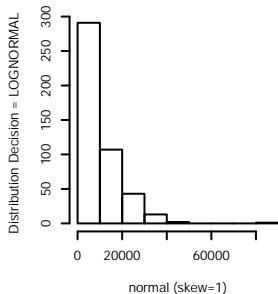

M3\_19168

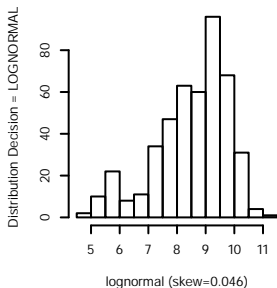

M3\_23675

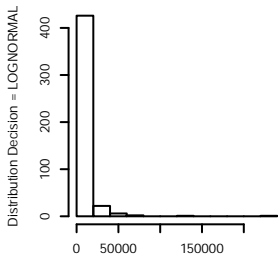

M3\_23675

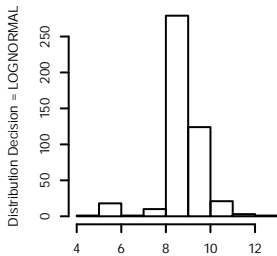

M3\_99786

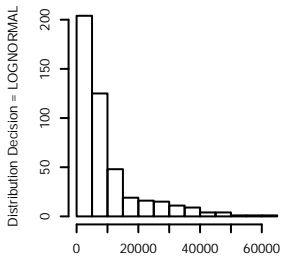

M3\_99786

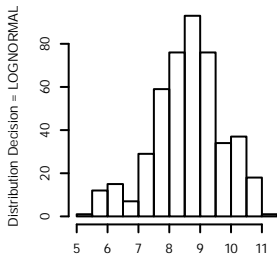

M3\_99794

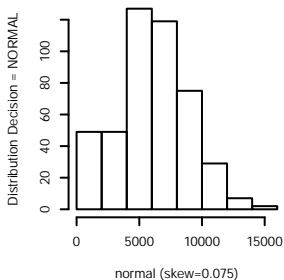

M3\_99794

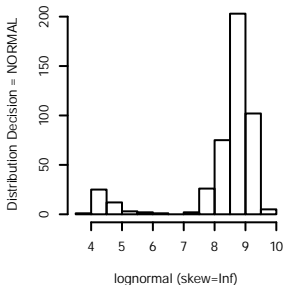

M3\_26848

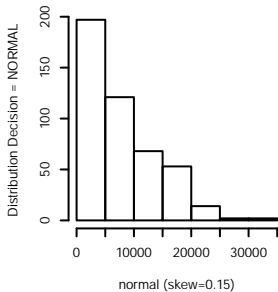

M3\_26848

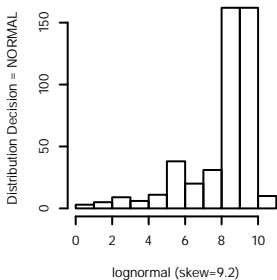



M3\_04426

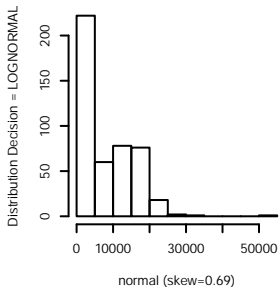

M3\_04426

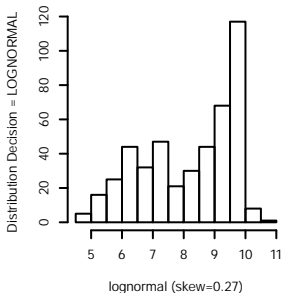

M3\_71050

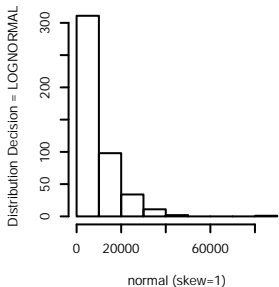

M3\_71050

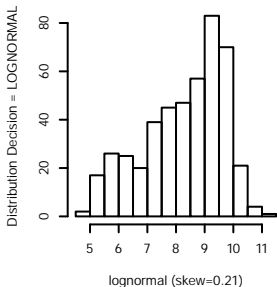

M3\_65393

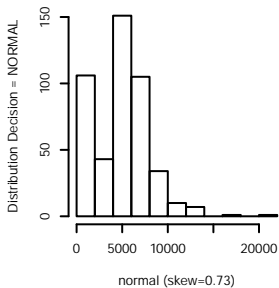

M3\_65393

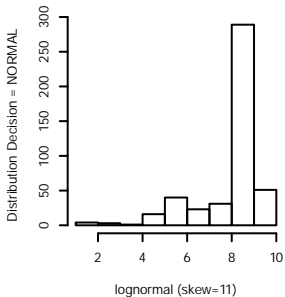

M3\_16043

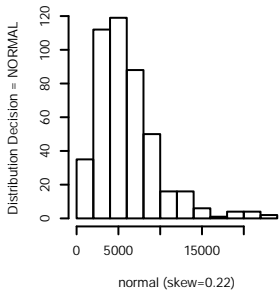

M3\_16043

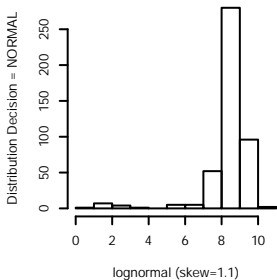

M3\_99239

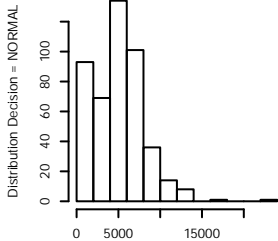

M3\_99239

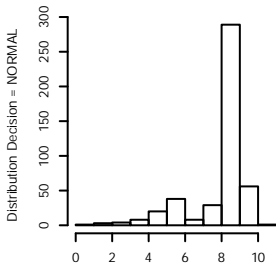

M3\_65981

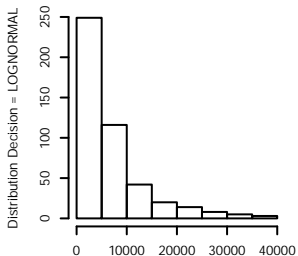

M3\_65981

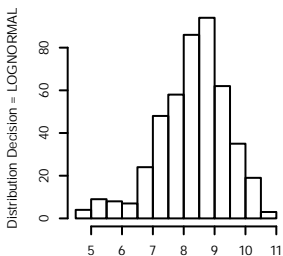

M3\_72853

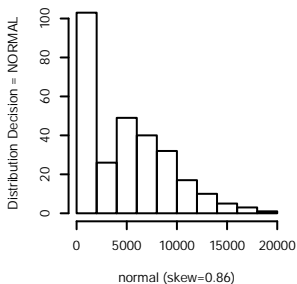

M3\_72853

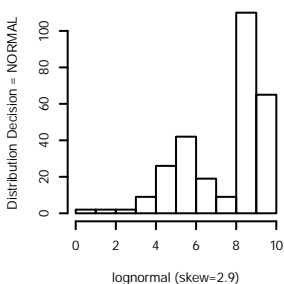

M3\_06309

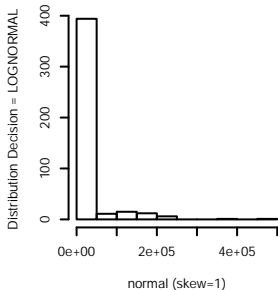

M3\_06309

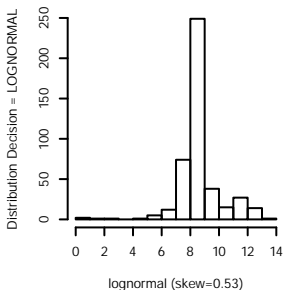

M3\_99596

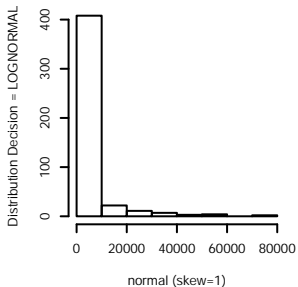

M3\_99596

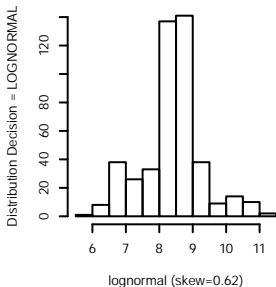

M3\_28885

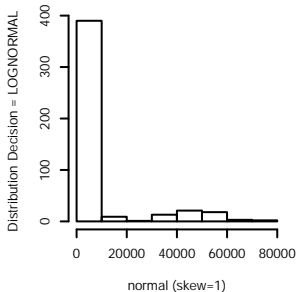

M3\_28885

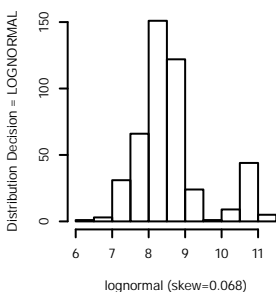

M3\_26858

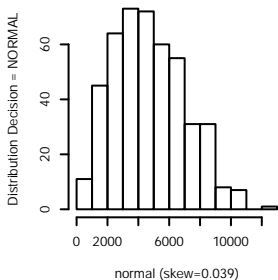

M3\_26858

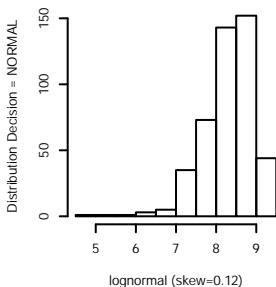

M3\_88810

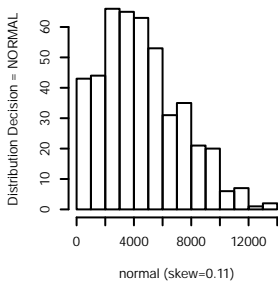

M3\_88810

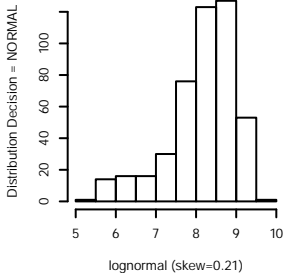

M3\_21574

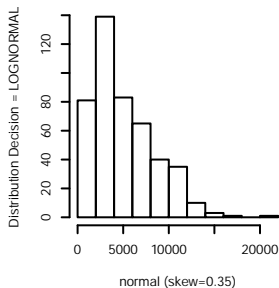

M3\_21574

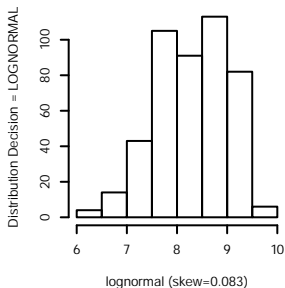

M3\_61230

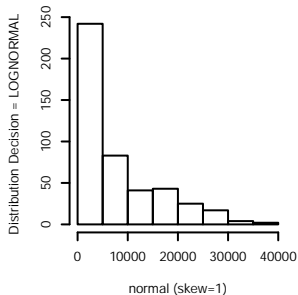

M3\_61230

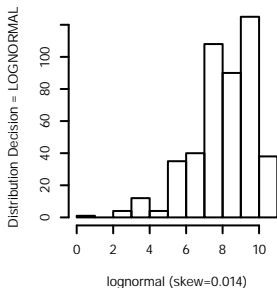

M3\_00624

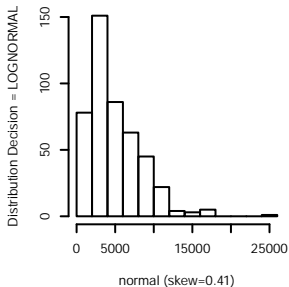

M3\_00624

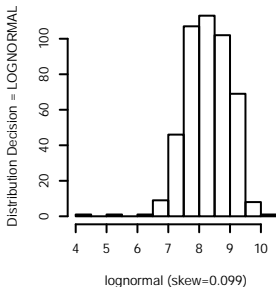

M3\_68313

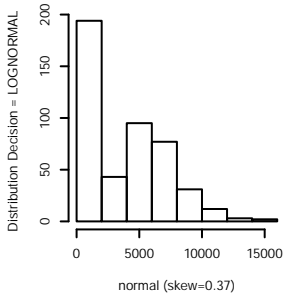

M3\_68313

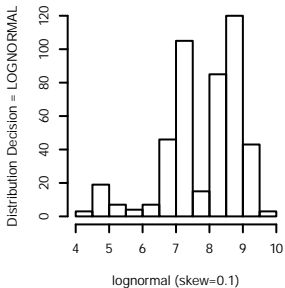



M3\_26922

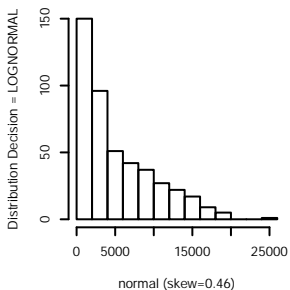

M3\_26922

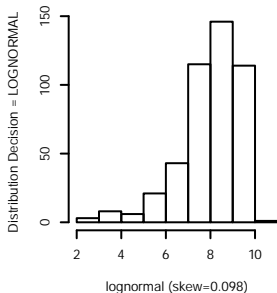

M3\_73925

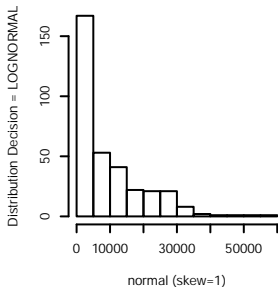

M3\_73925

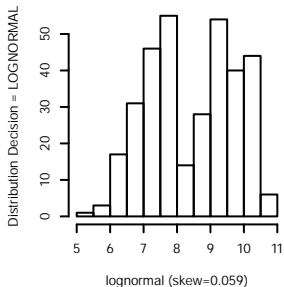

M3\_83351

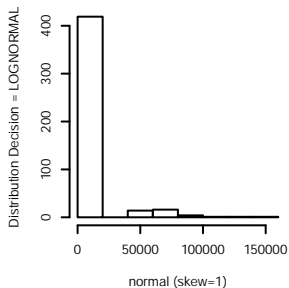

M3\_83351

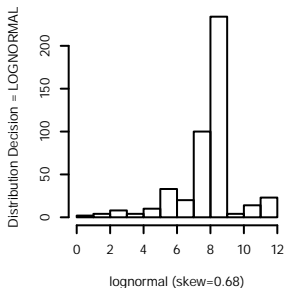

M3\_52091

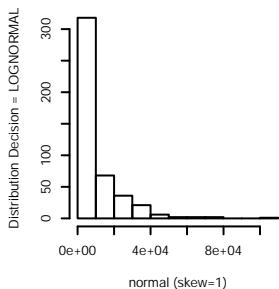

M3\_52091

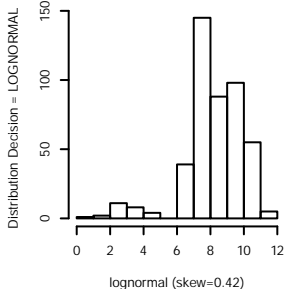

M3\_13324

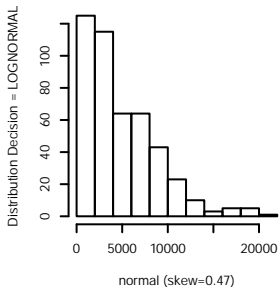

M3\_13324

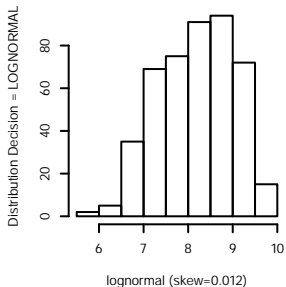

M3\_00850

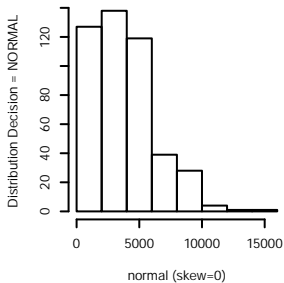

M3\_00850

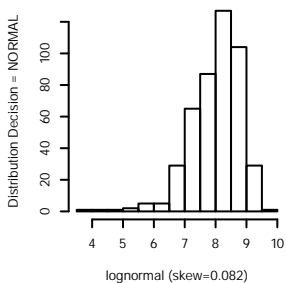

M3\_70717

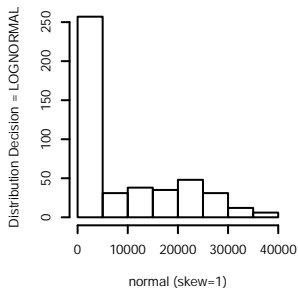

M3\_70717

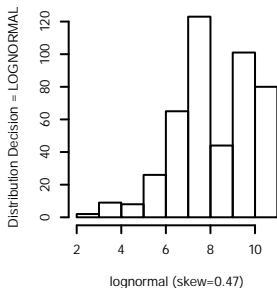

M3\_99159

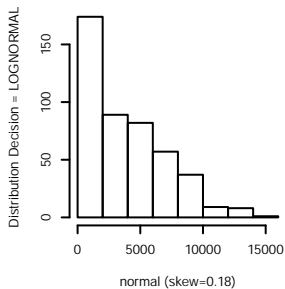

M3\_99159

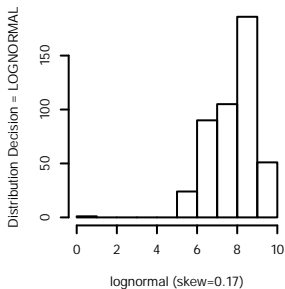

M3\_79886

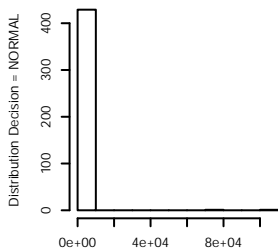

normal (skew=1)

M3\_79886

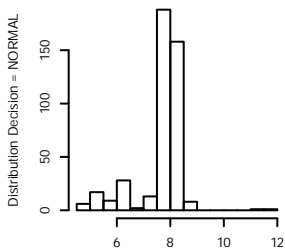

lognormal (skew=5.2)

M3\_23833

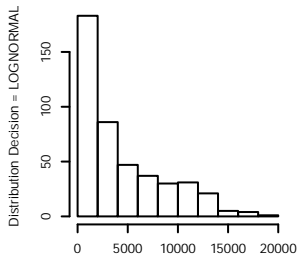

normal (skew=0.69)

M3\_23833

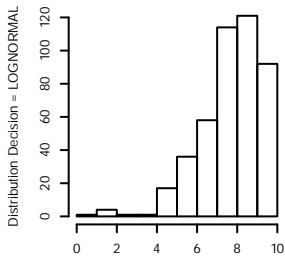

lognormal (skew=0.042)

M3\_08490

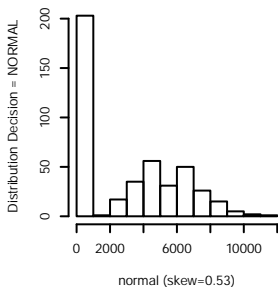

M3\_08490

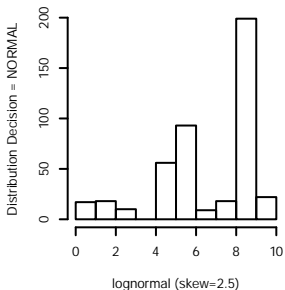

M3\_01616

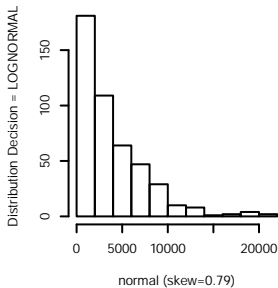

M3\_01616

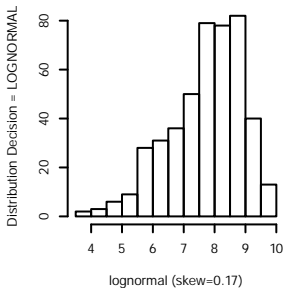

M3\_22169

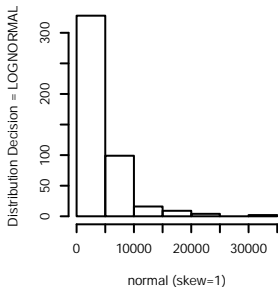

M3\_22169

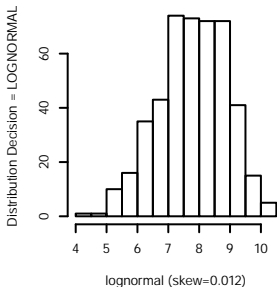

M3\_23566

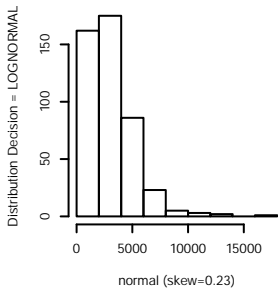

M3\_23566

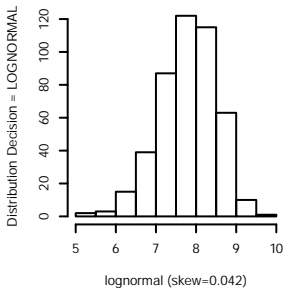

M3\_07925

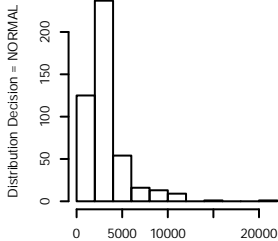

normal (skew=0.22)

M3\_07925

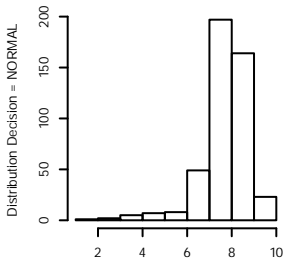

lognormal (skew=0.59)

M3\_38087

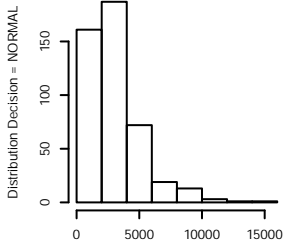

normal (skew=0)

M3\_38087

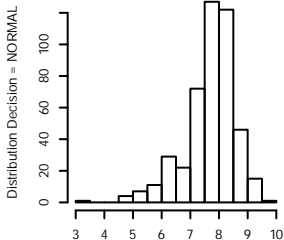

lognormal (skew=0.17)



M3\_99203

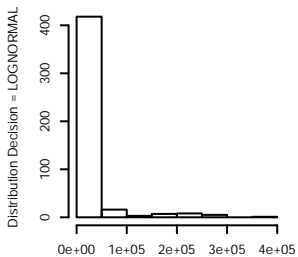

M3\_99203

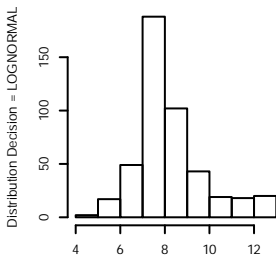

M3\_03592

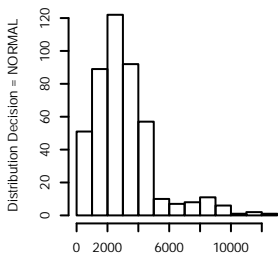

M3\_03592

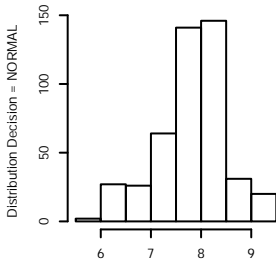

M3\_26844

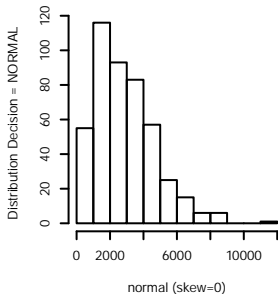

M3\_26844

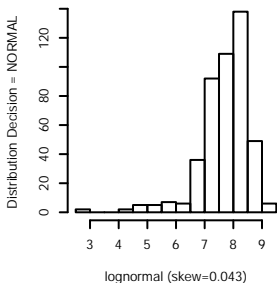

M3\_24232

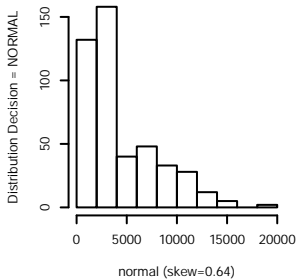

M3\_24232

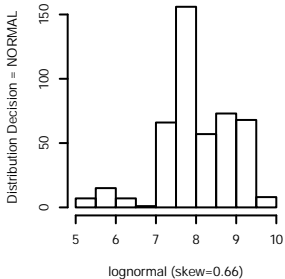

M3\_71392

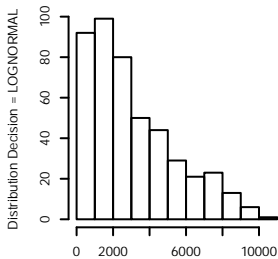

normal (skew=0.18)

M3\_71392

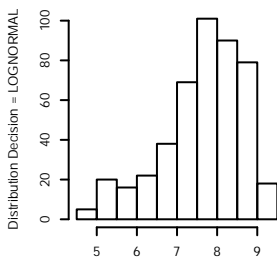

lognormal (skew=0.028)

M3\_83311

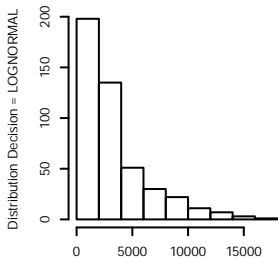

normal (skew=0.8)

M3\_83311

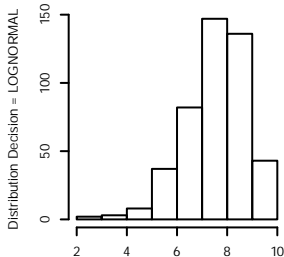

lognormal (skew=0.045)

M3\_16445

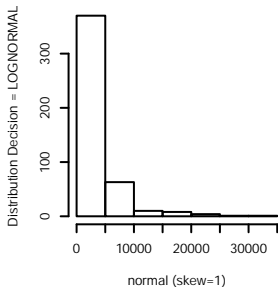

M3\_16445

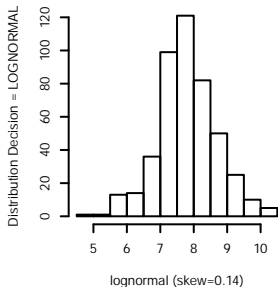

M3\_28311

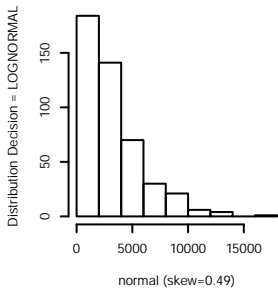

M3\_28311

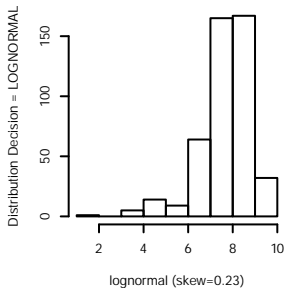

M3\_26876

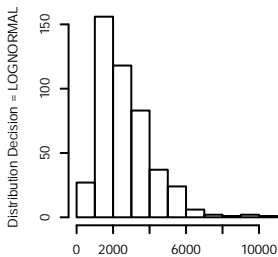

normal (skew=0.48)

M3\_26876

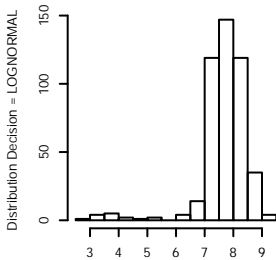

lognormal (skew=0.31)

M3\_38320

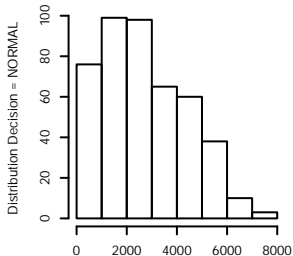

normal (skew=0.2)

M3\_38320

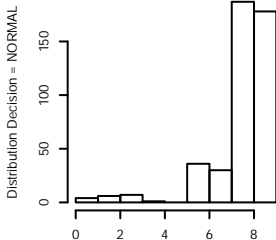

lognormal (skew=17)

M3\_16428

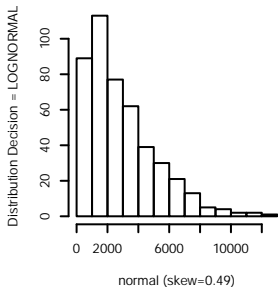

M3\_16428

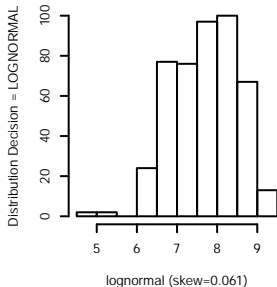

M3\_37816

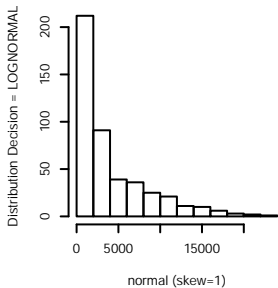

M3\_37816

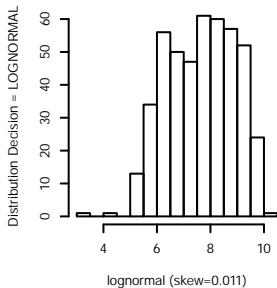

M3\_07692

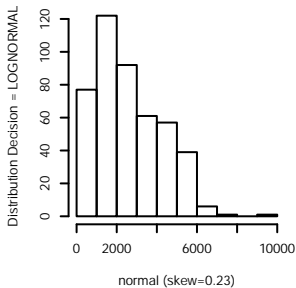

M3\_07692

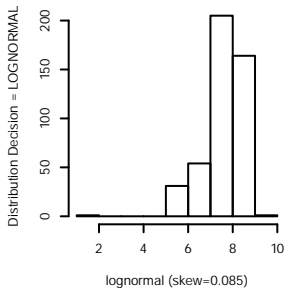

M3\_17797

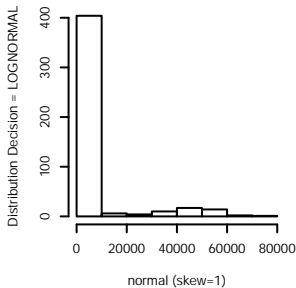

M3\_17797

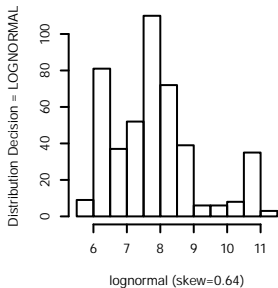

M3\_04425

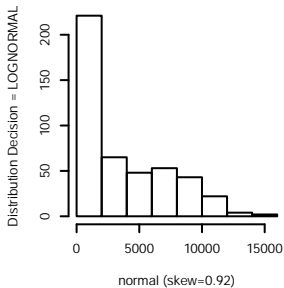

M3\_04425

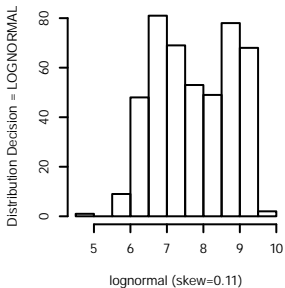

M3\_03091

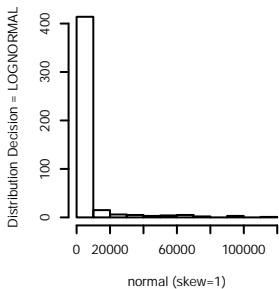

M3\_03091

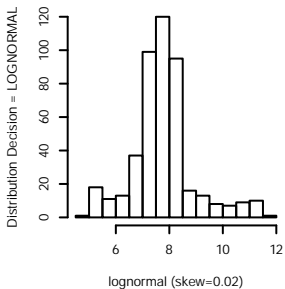



M3\_22652

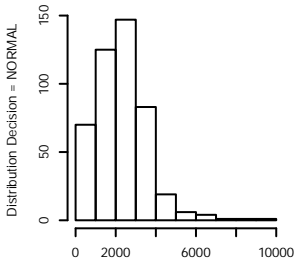

M3\_22652

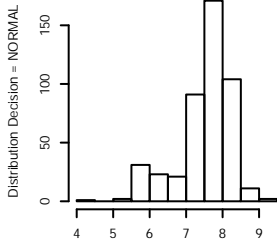

M3\_35373

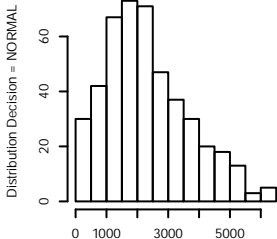

M3\_35373

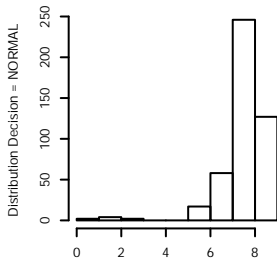

M3\_09642

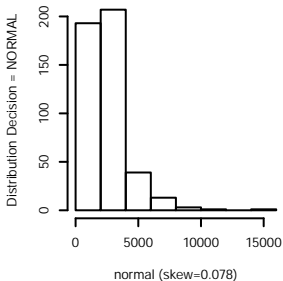

M3\_09642

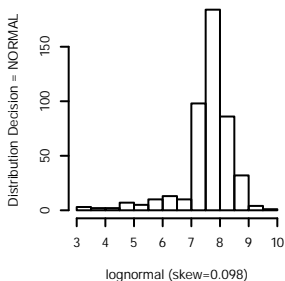

M3\_55826

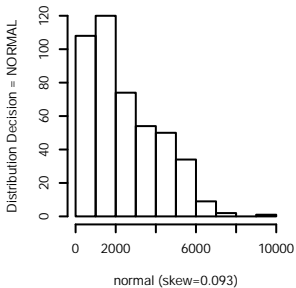

M3\_55826

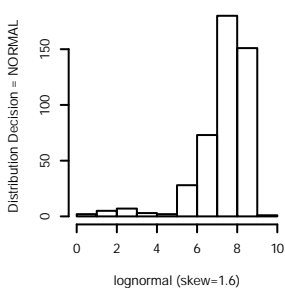

M3\_94266

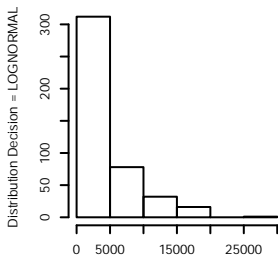

normal (skew=1)

M3\_94266

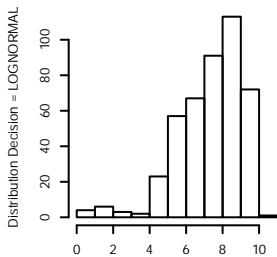

lognormal (skew=0.069)

M3\_40265

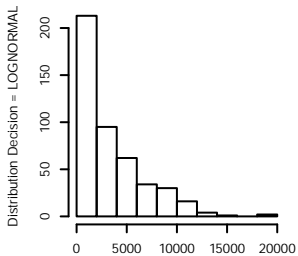

normal (skew=0.97)

M3\_40265

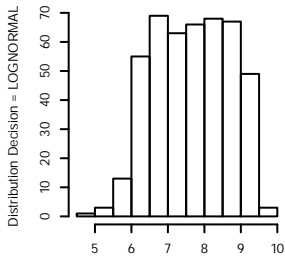

lognormal (skew=0.022)

M3\_88822

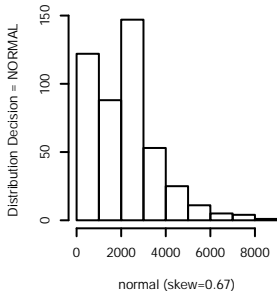

M3\_88822

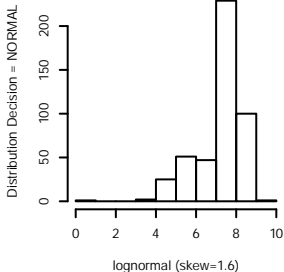

M3\_74686

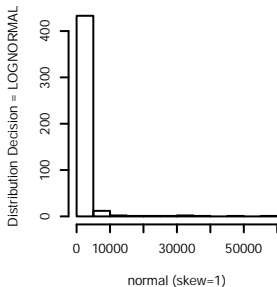

M3\_74686

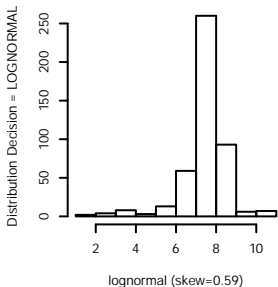

M3\_34717

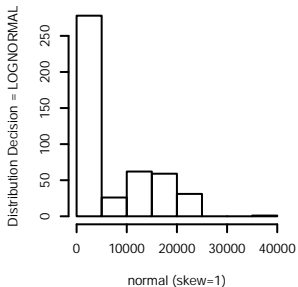

M3\_34717

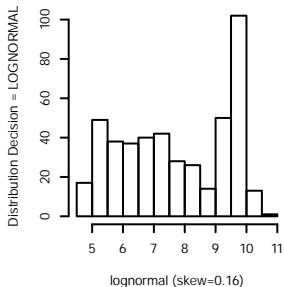

M3\_63733

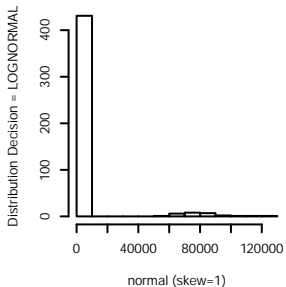

M3\_63733

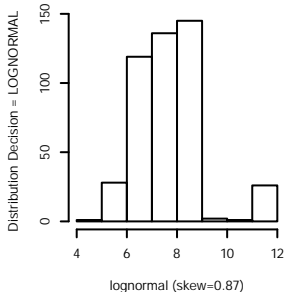

M3\_99942

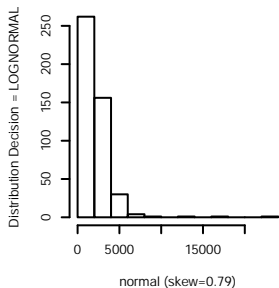

M3\_99942

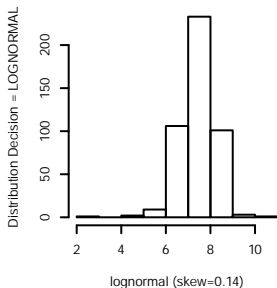

M3\_74206

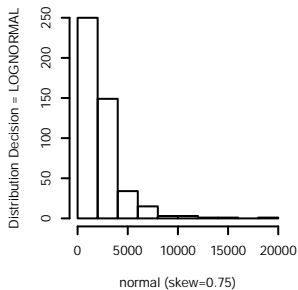

M3\_74206

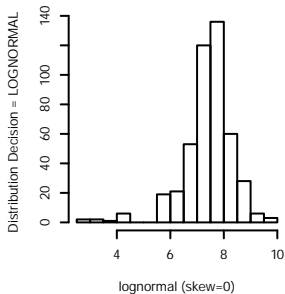

M3\_65868

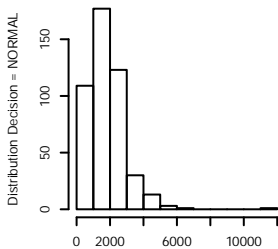

M3\_65868

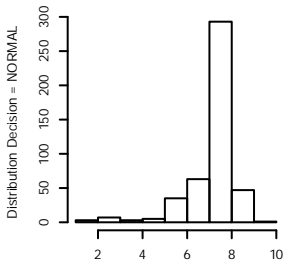

M3\_55829

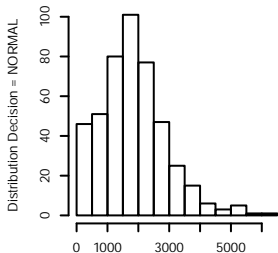

M3\_55829

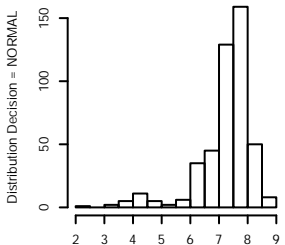

M3\_40252

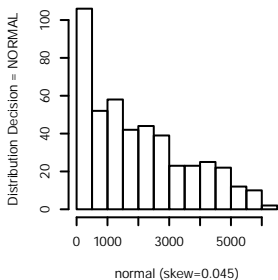

M3\_40252

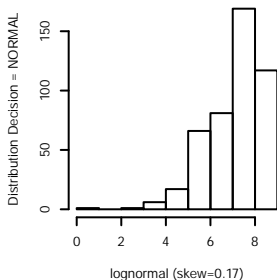

M3\_38057

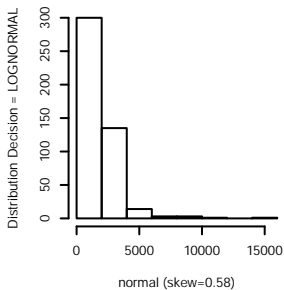

M3\_38057

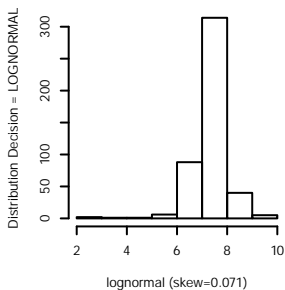



M3\_67932

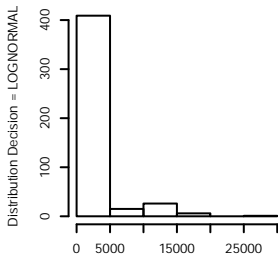

normal (skew=1)

M3\_67932

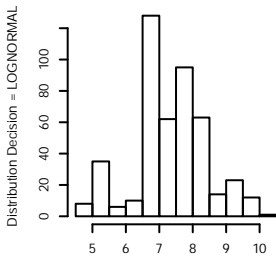

lognormal (skew=0.038)

M3\_26860

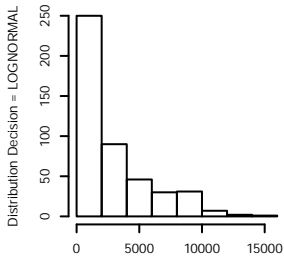

normal (skew=0.67)

M3\_26860

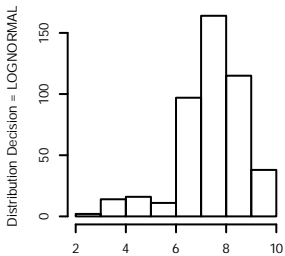

lognormal (skew=0.34)

M3\_39428

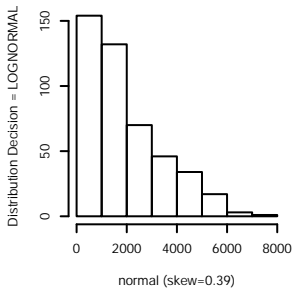

M3\_39428

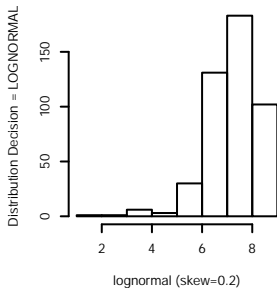

M3\_65026

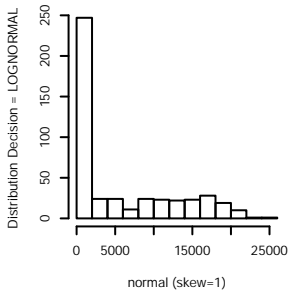

M3\_65026

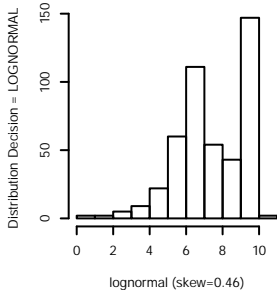

M3\_28330

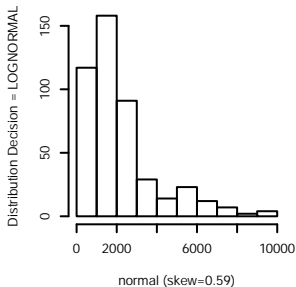

M3\_28330

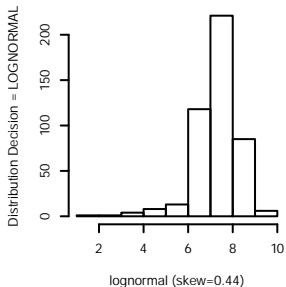

M3\_09540

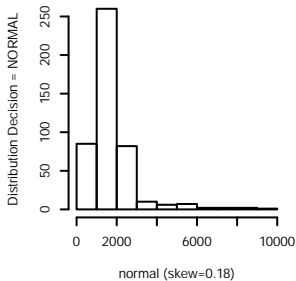

M3\_09540

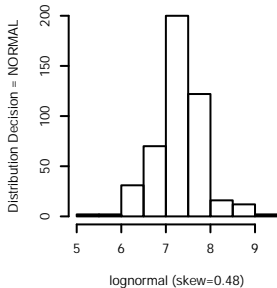

M3\_00139

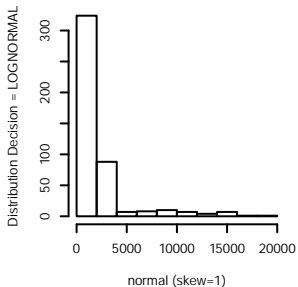

M3\_00139

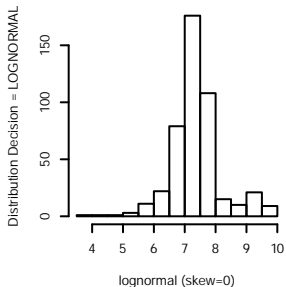

M3\_08731

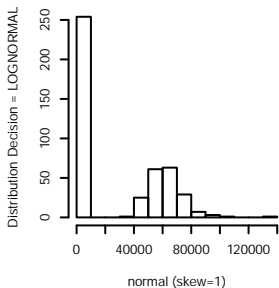

M3\_08731

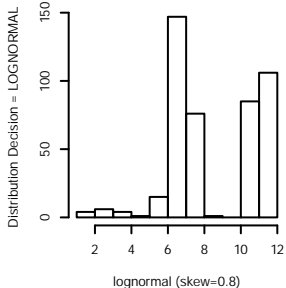

M3\_37785

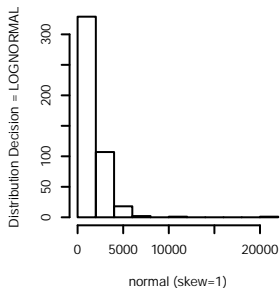

M3\_37785

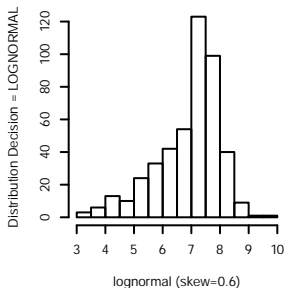

M3\_30990

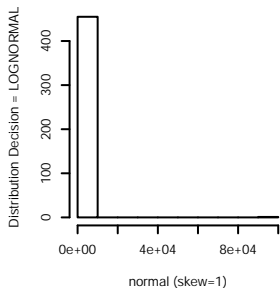

M3\_30990

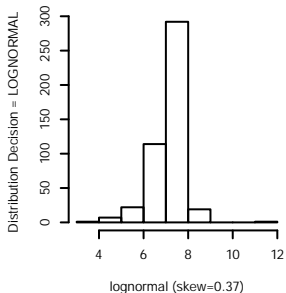

M3\_08772

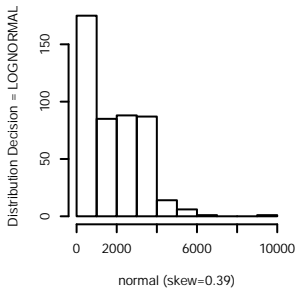

M3\_08772

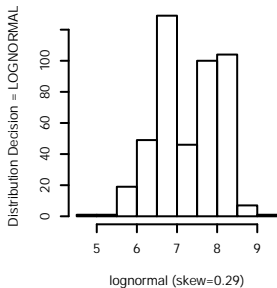

M3\_19174

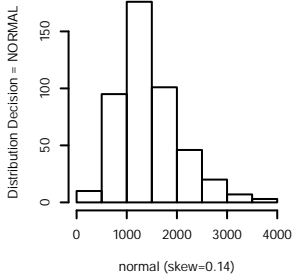

M3\_19174

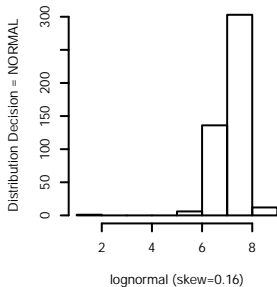

M3\_25281

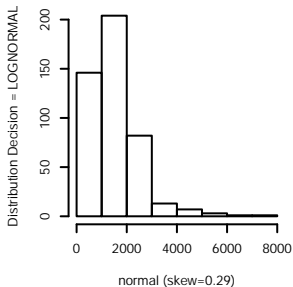

M3\_25281

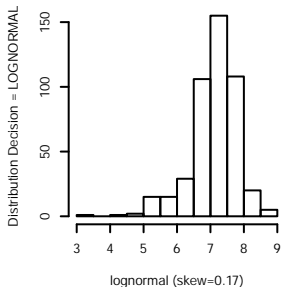

M3\_94988

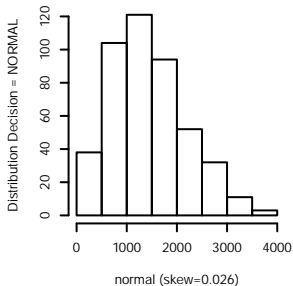

M3\_94988

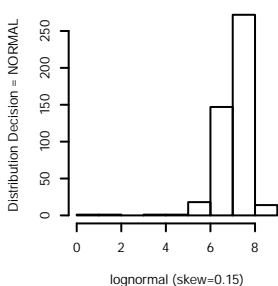

M3\_70983

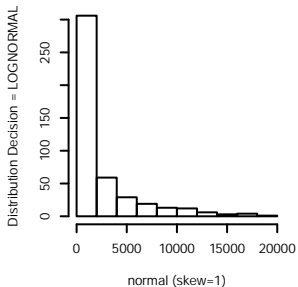

M3\_70983

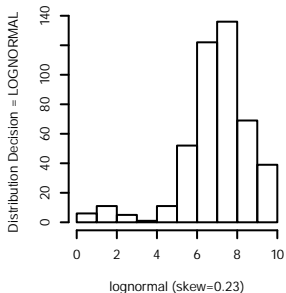

M3\_99153

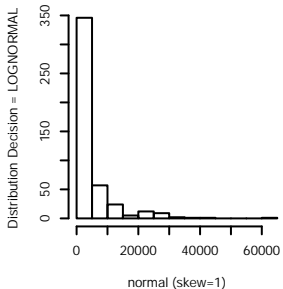

M3\_99153

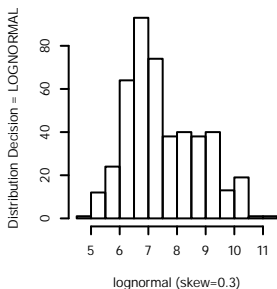



M3\_18787

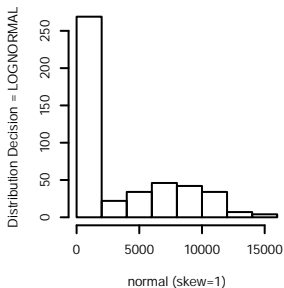

M3\_18787

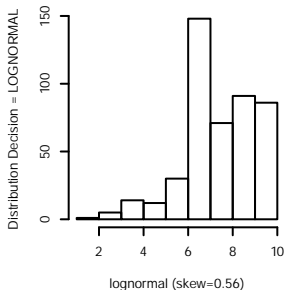

M3\_04346

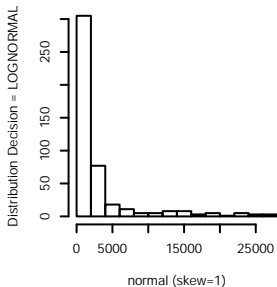

M3\_04346

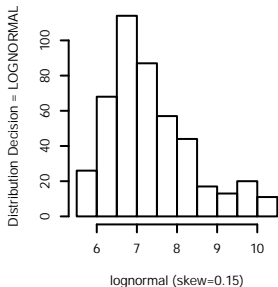

M3\_37822

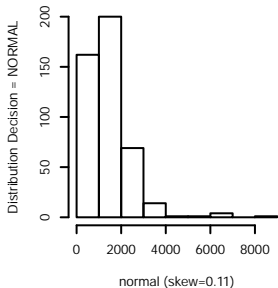

M3\_37822

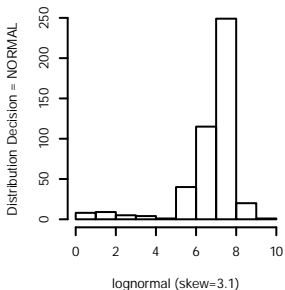

M3\_23837

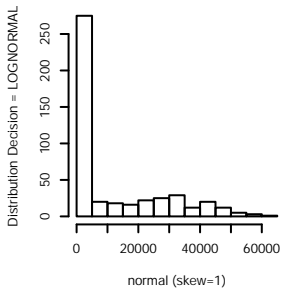

M3\_23837

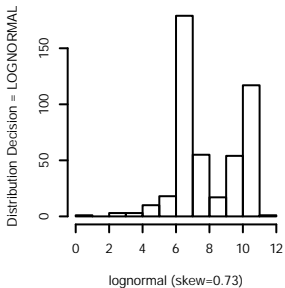

M3\_31657

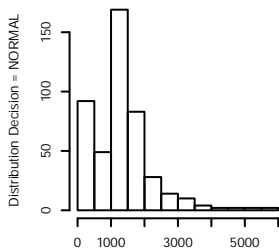

M3\_31657

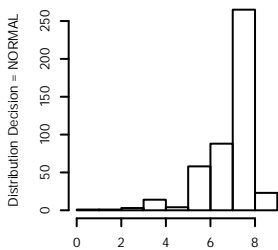

M3\_26864

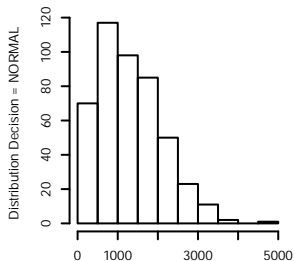

M3\_26864

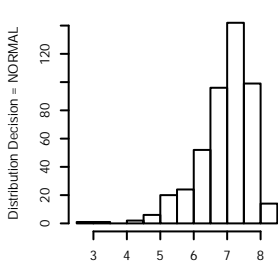

M3\_28377

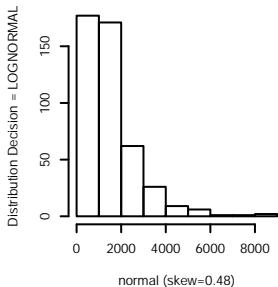

M3\_28377

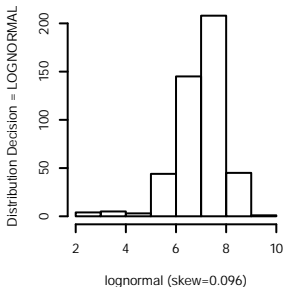

M3\_39455

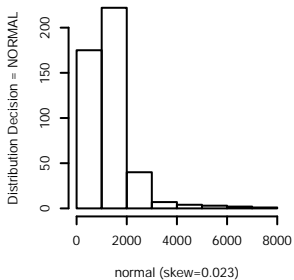

M3\_39455

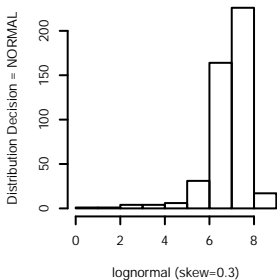

M3\_70289

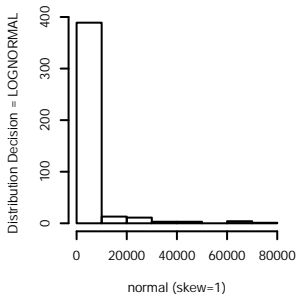

M3\_70289

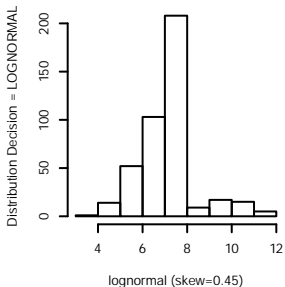

M3\_71416

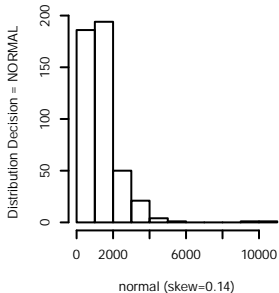

M3\_71416

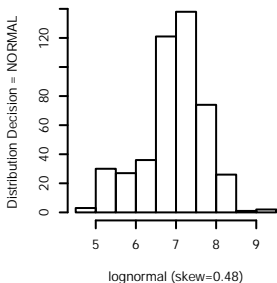

M3\_26910

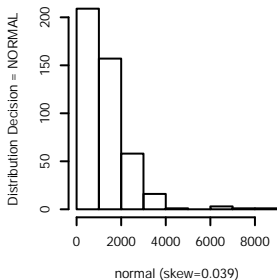

M3\_26910

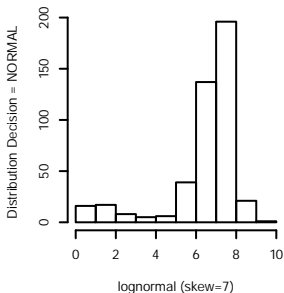

M3\_77404

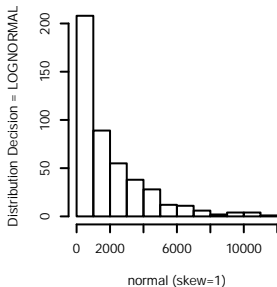

M3\_77404

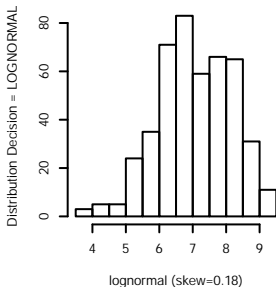

M3\_55340

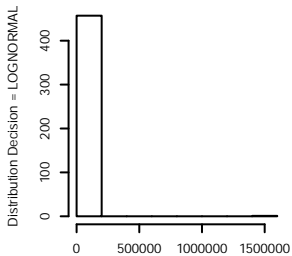

M3\_55340

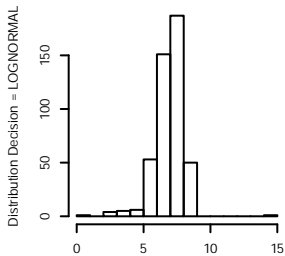

M3\_58744

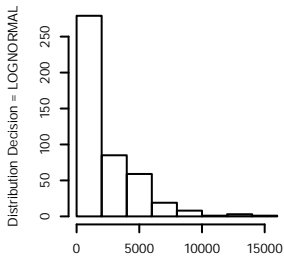

M3\_58744

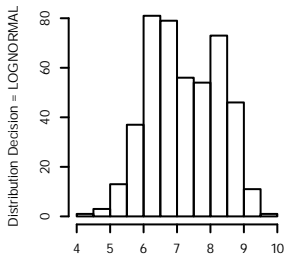

M3\_19032

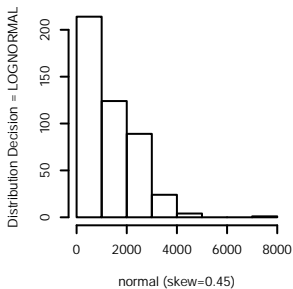

M3\_19032

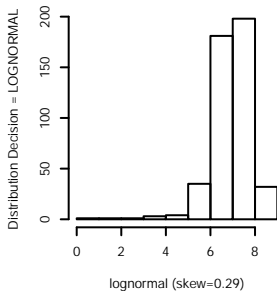

M3\_72694

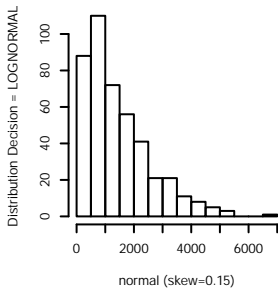

M3\_72694

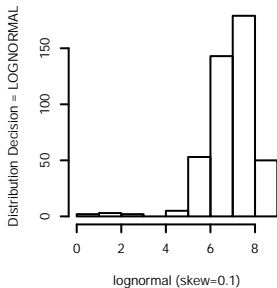



M3\_00471

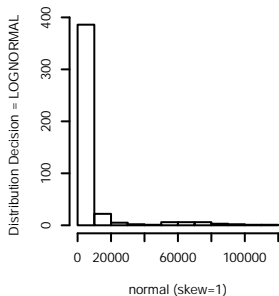

M3\_00471

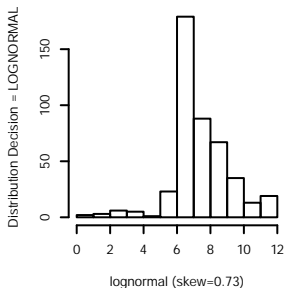

M3\_69625

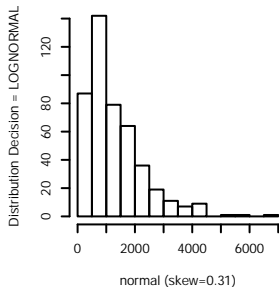

M3\_69625

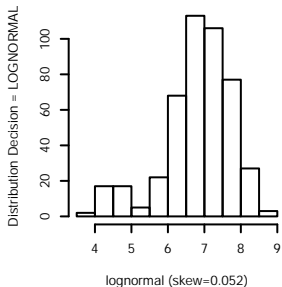

M3\_23973

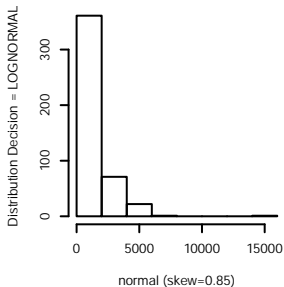

M3\_23973

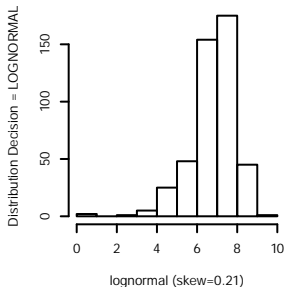

M3\_00448

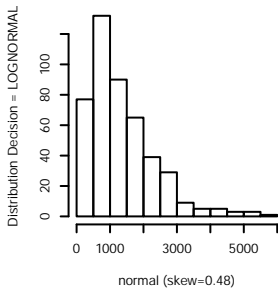

M3\_00448

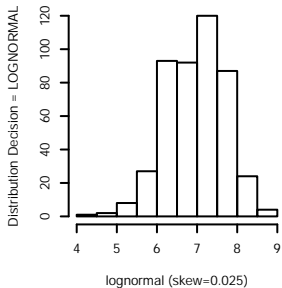

M3\_39431

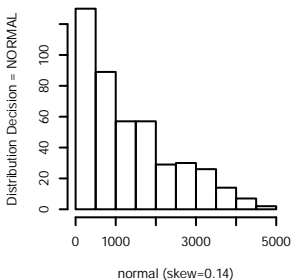

M3\_39431

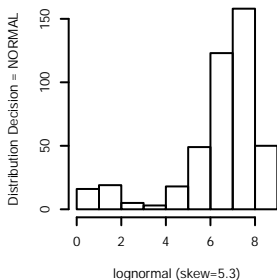

M3\_55836

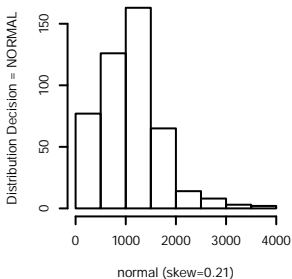

M3\_55836

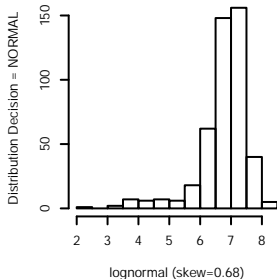

M3\_99130

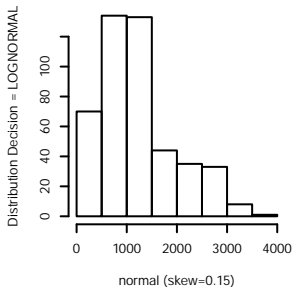

M3\_99130

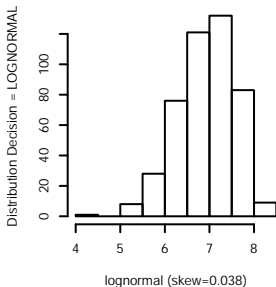

M3\_03761

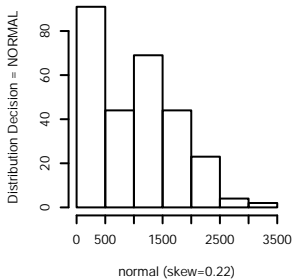

M3\_03761

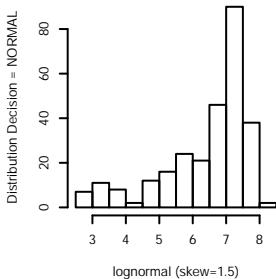

M3\_13961

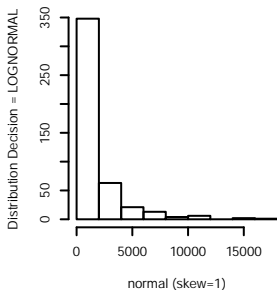

M3\_13961

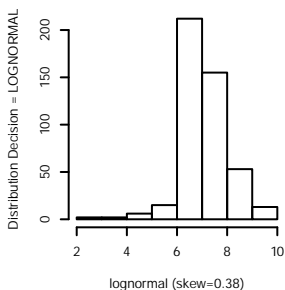

M3\_37821

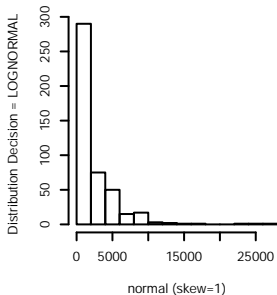

M3\_37821

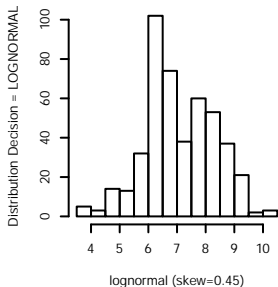

M3\_39873

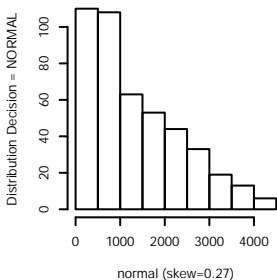

M3\_39873

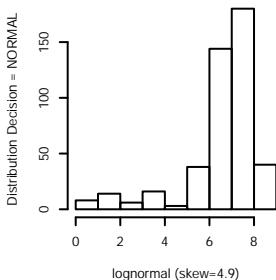

M3\_14535

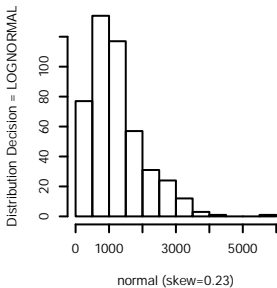

M3\_14535

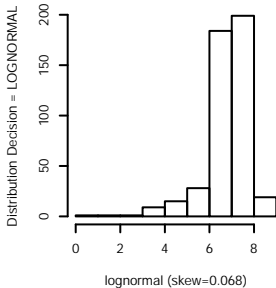

M3\_28572

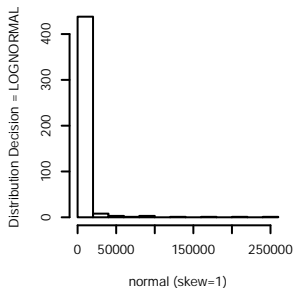

M3\_28572

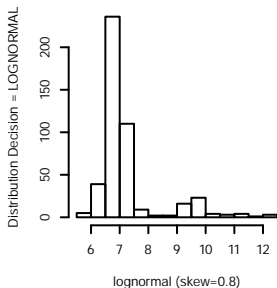

M3\_27017

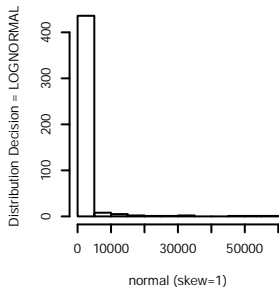

M3\_27017

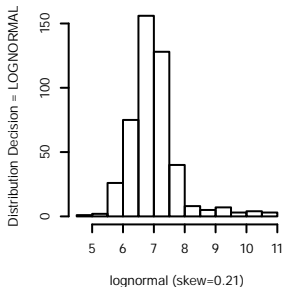

M3\_65895

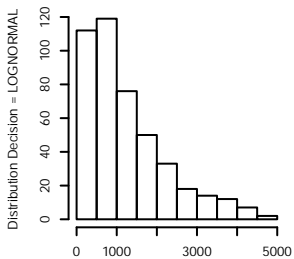

normal (skew=0.44)

M3\_65895

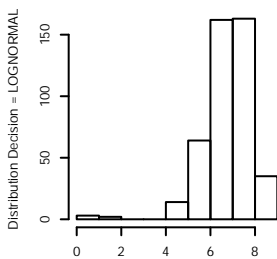

lognormal (skew=0.056)

M3\_83322

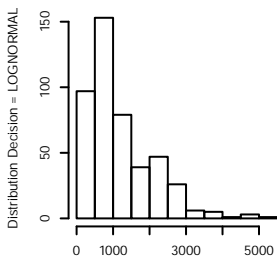

normal (skew=0.58)

M3\_83322

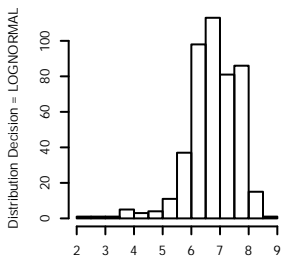

lognormal (skew=0.32)



M3\_99218

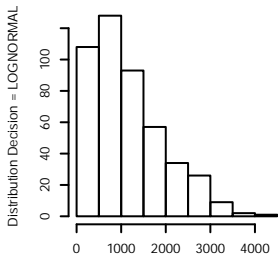

M3\_99218

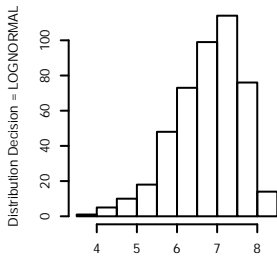

M3\_35972

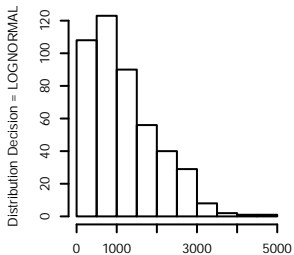

M3\_35972

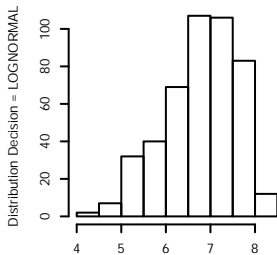

M3\_81112

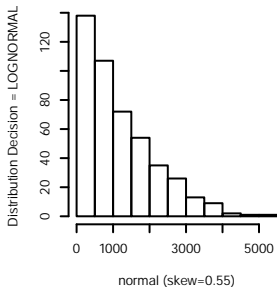

M3\_81112

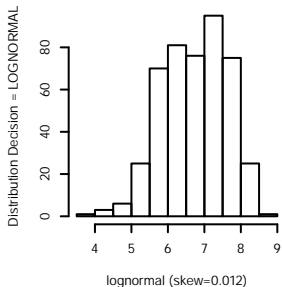

M3\_26850

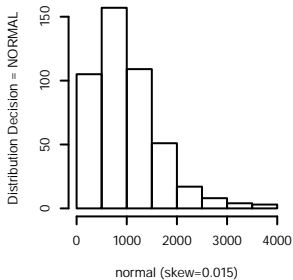

M3\_26850

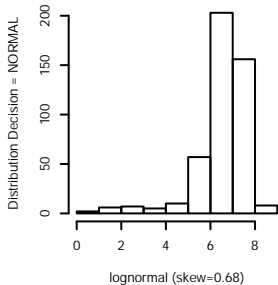

M3\_10901

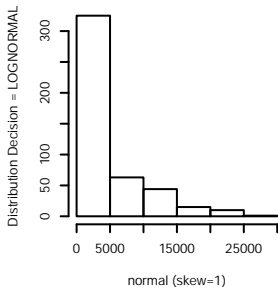

M3\_10901

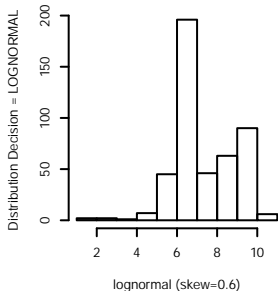

M3\_63416

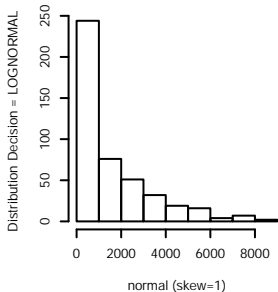

M3\_63416

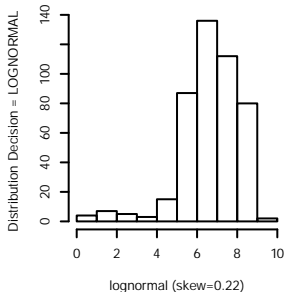

M3\_37286

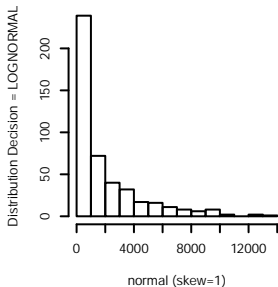

M3\_37286

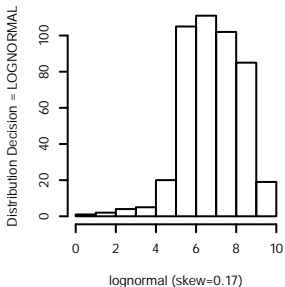

M3\_81268

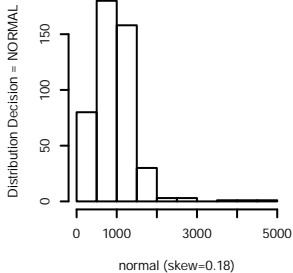

M3\_81268

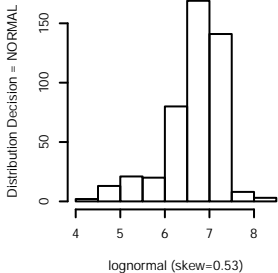

M3\_26851

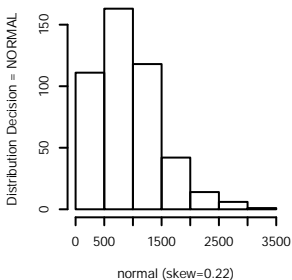

M3\_26851

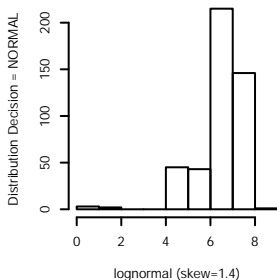

M3\_26906

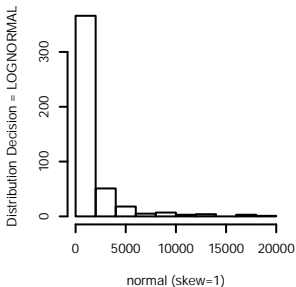

M3\_26906

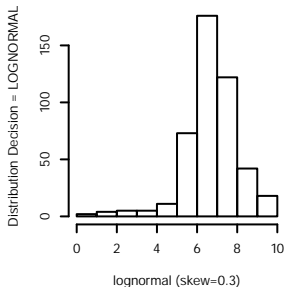

M3\_23191

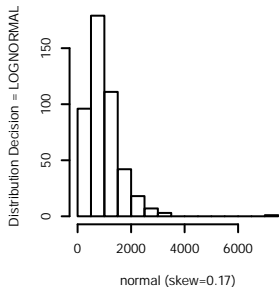

M3\_23191

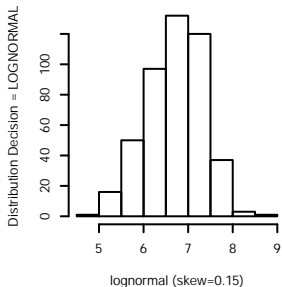

M3\_53384

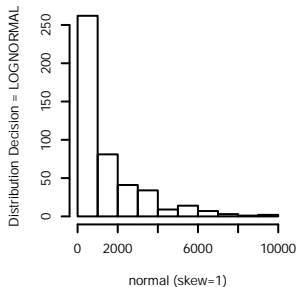

M3\_53384

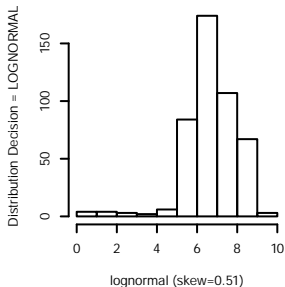

M3\_29268

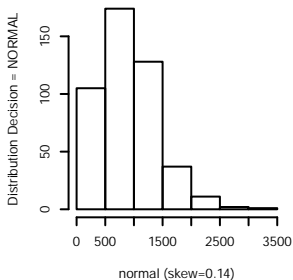

M3\_29268

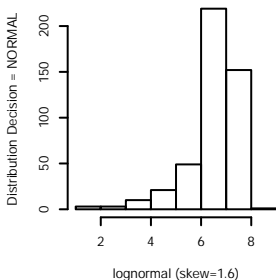

M3\_83244

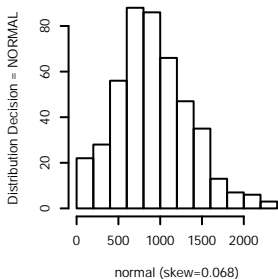

M3\_83244

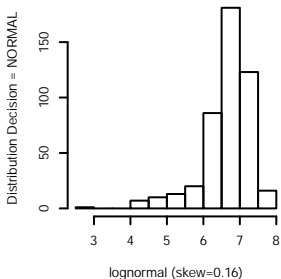

M3\_23521

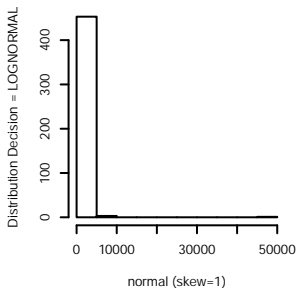

M3\_23521

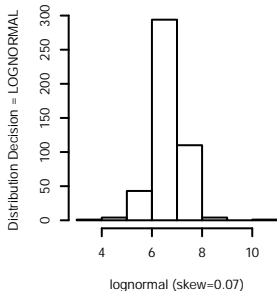

M3\_13960

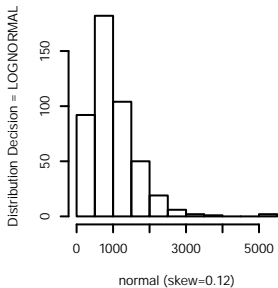

M3\_13960

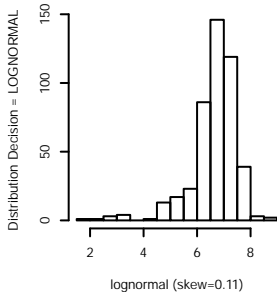



M3\_99129

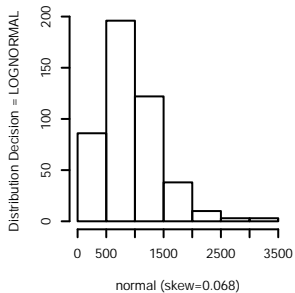

M3\_99129

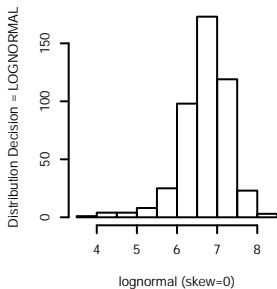

M3\_68365

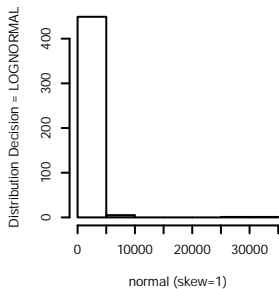

M3\_68365

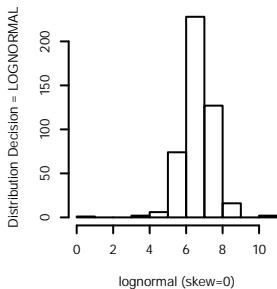

M3\_26846

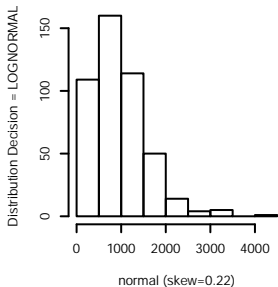

M3\_26846

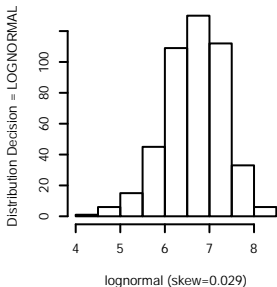

M3\_27352

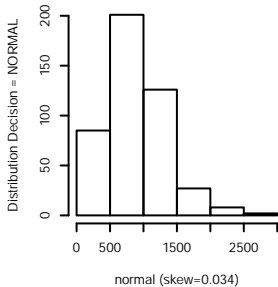

M3\_27352

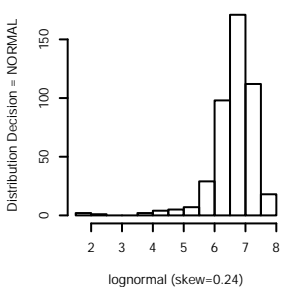

M3\_13697

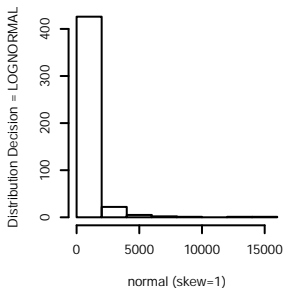

M3\_13697

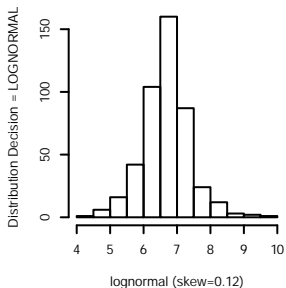

M3\_89052

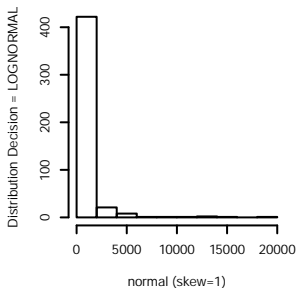

M3\_89052

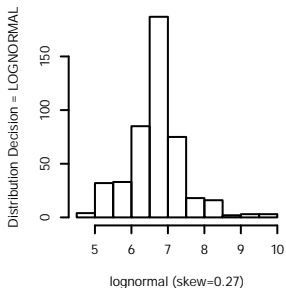

M3\_70003

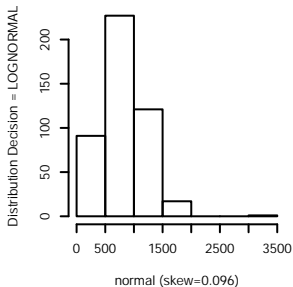

M3\_70003

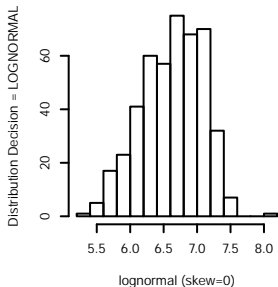

M3\_28983

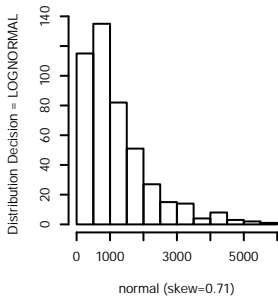

M3\_28983

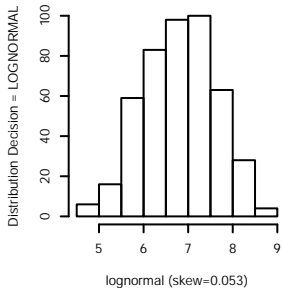

M3\_20259

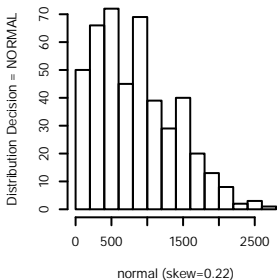

M3\_20259

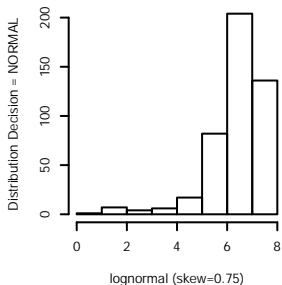

M3\_99091

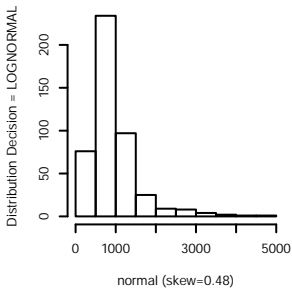

M3\_99091

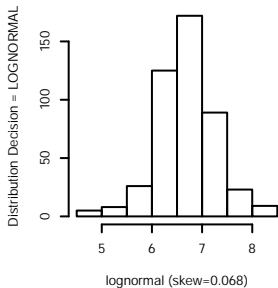

M3\_38106

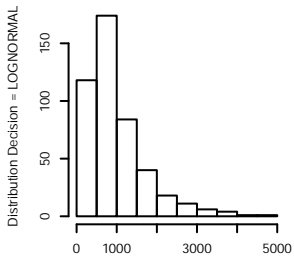

normal (skew=0.5)

M3\_38106

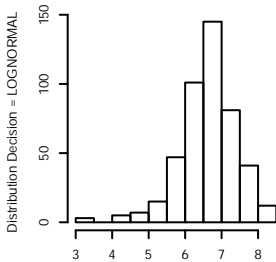

lognormal (skew=0.21)

M3\_23531

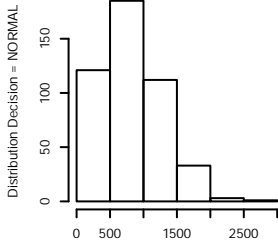

normal (skew=0.042)

M3\_23531

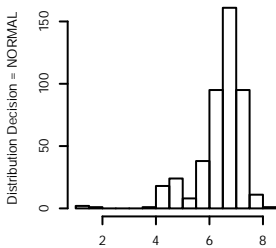

lognormal (skew=0.57)

M3\_28673

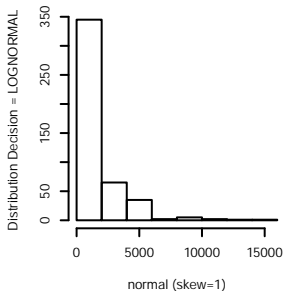

M3\_28673

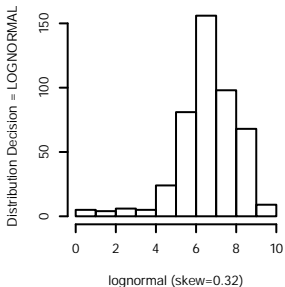

M3\_94986

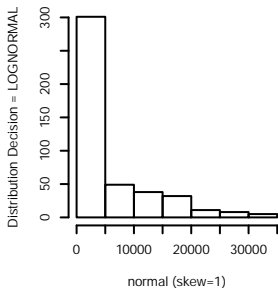

M3\_94986

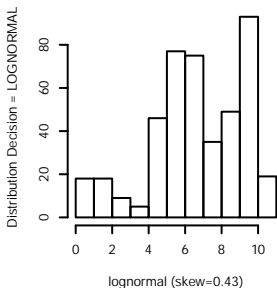

M3\_37823

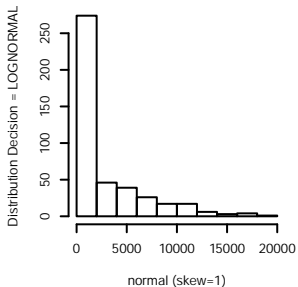

M3\_37823

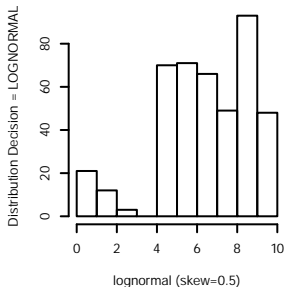

M3\_18951

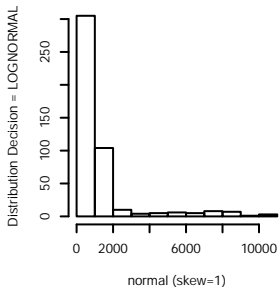

M3\_18951

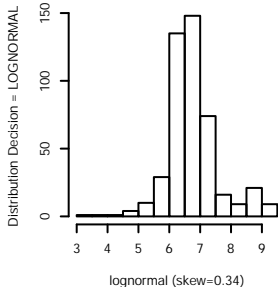



M3\_23548

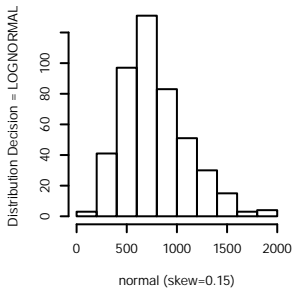

M3\_23548

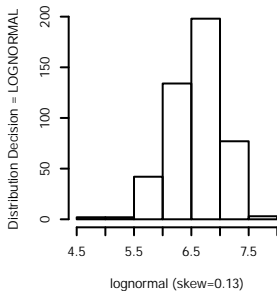

M3\_24849

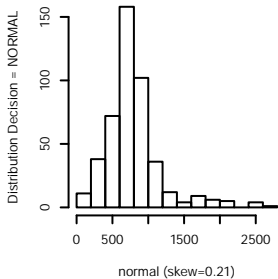

M3\_24849

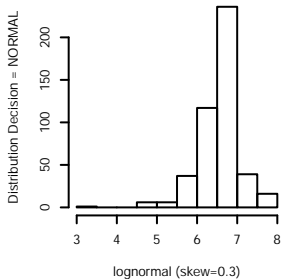

M3\_20889

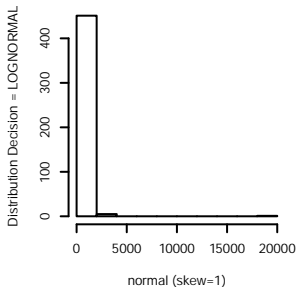

M3\_20889

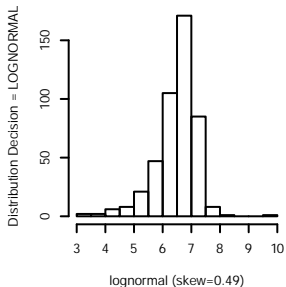

M3\_23506

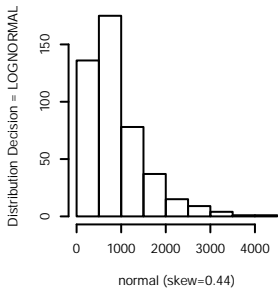

M3\_23506

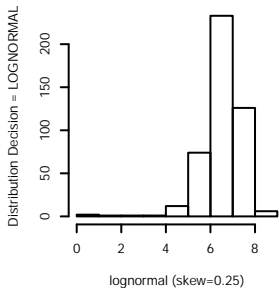

M3\_38896

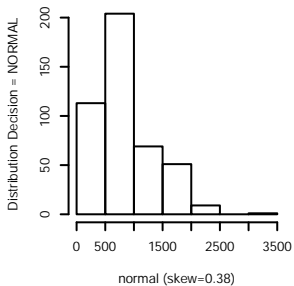

M3\_38896

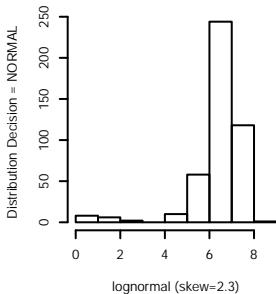

M3\_10904

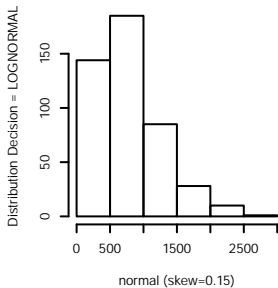

M3\_10904

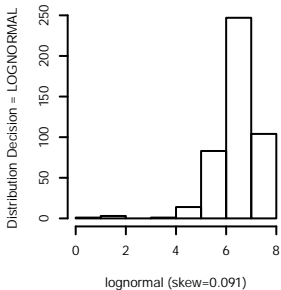

M3\_81216

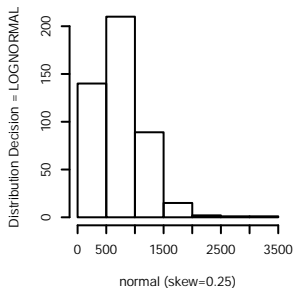

M3\_81216

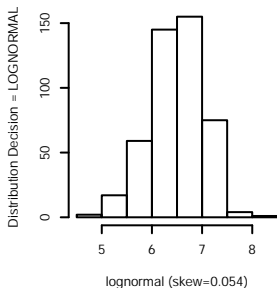

M3\_07223

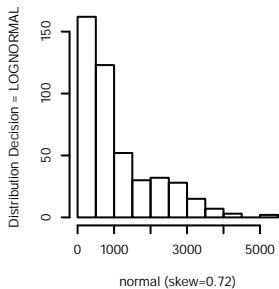

M3\_07223

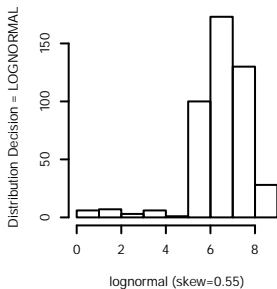

M3\_00920

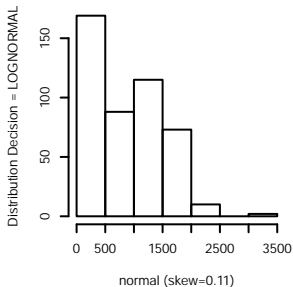

M3\_00920

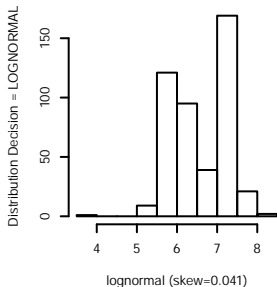

M3\_25555

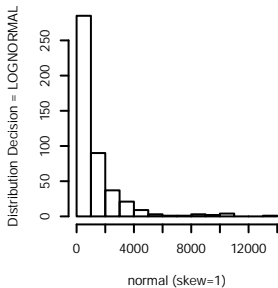

M3\_25555

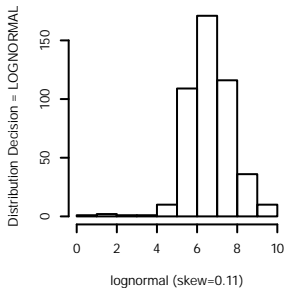

M3\_19501

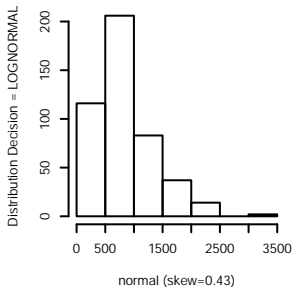

M3\_19501

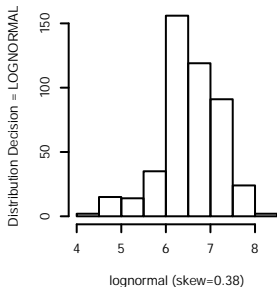

M3\_68152

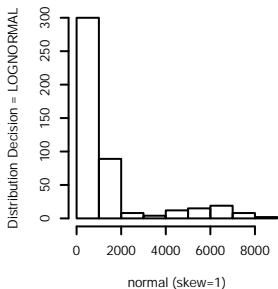

M3\_68152

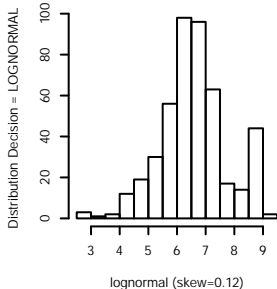

M3\_31132

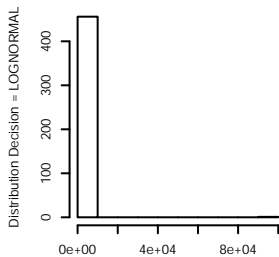

M3\_31132

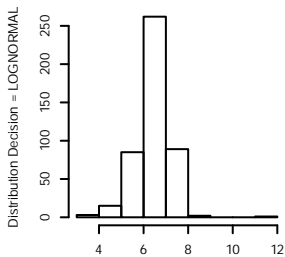

M3\_70888

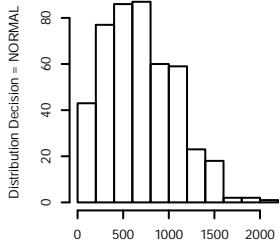

M3\_70888

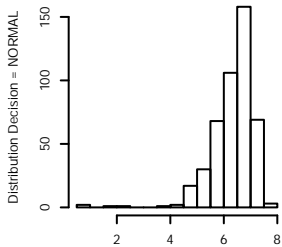

M3\_00379

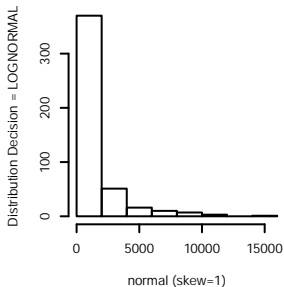

M3\_00379

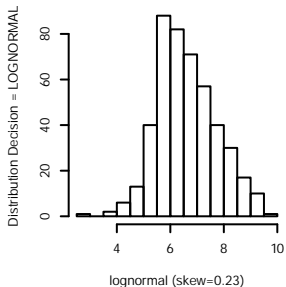

M3\_00906

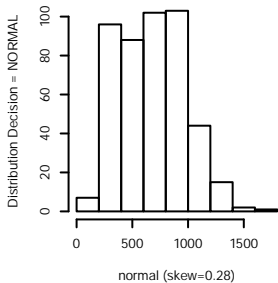

M3\_00906

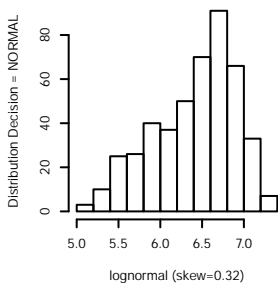



M3\_16767

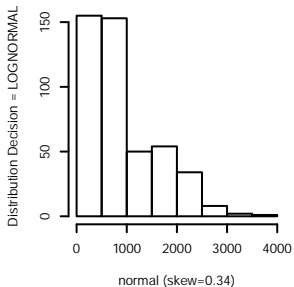

M3\_16767

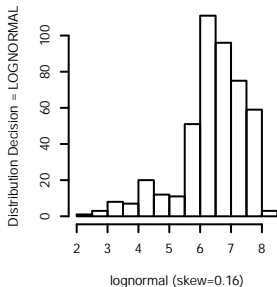

M3\_26845

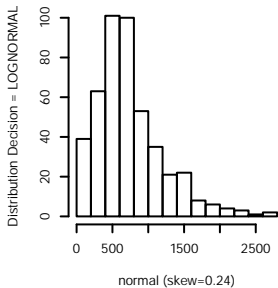

M3\_26845

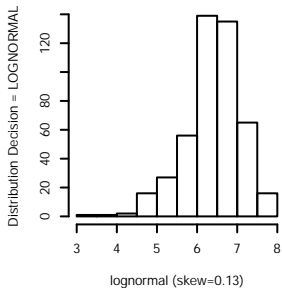

M3\_52756\_mixed\_spec\_with\_citrullin

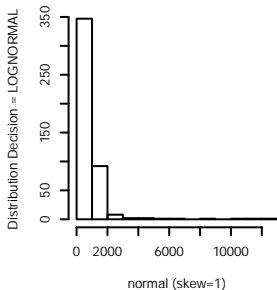

M3\_52756\_mixed\_spec\_with\_citrullin

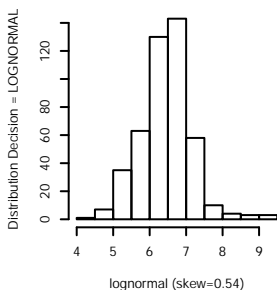

M3\_06308

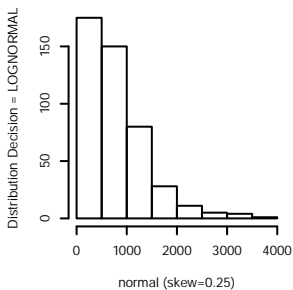

M3\_06308

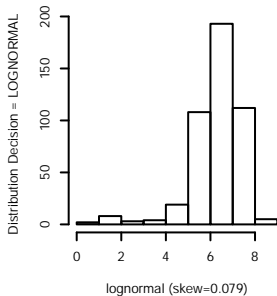

M3\_62792

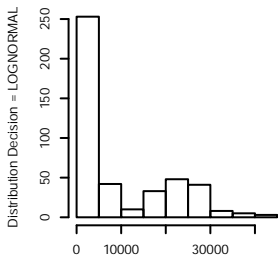

M3\_62792

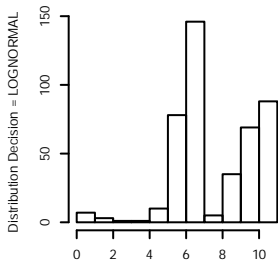

M3\_22050

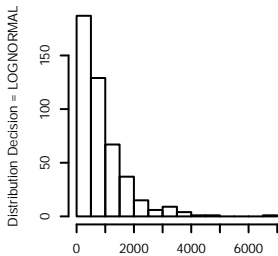

M3\_22050

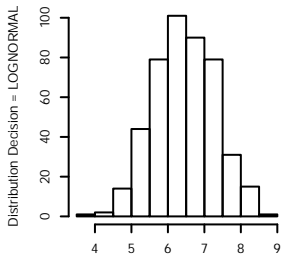

M3\_01887

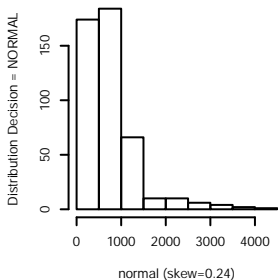

M3\_01887

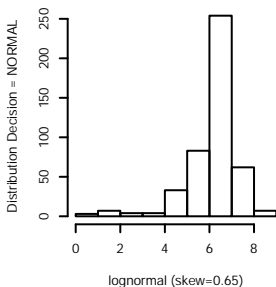

M3\_26903

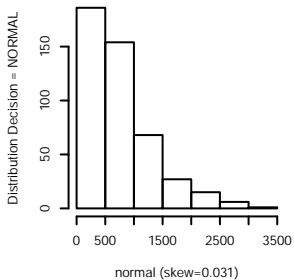

M3\_26903

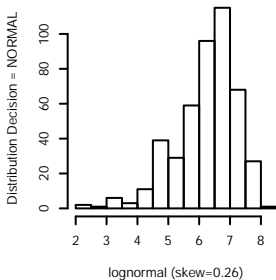

M3\_73450

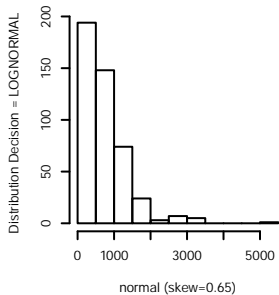

M3\_73450

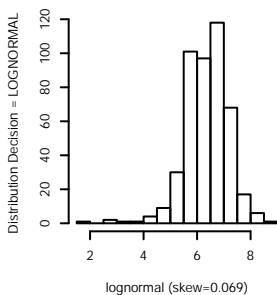

M3\_28143

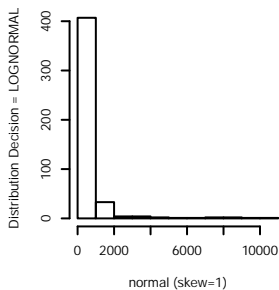

M3\_28143

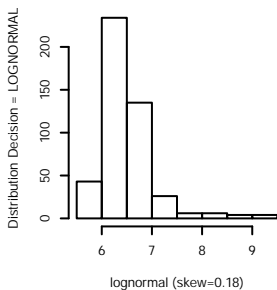

M3\_29880

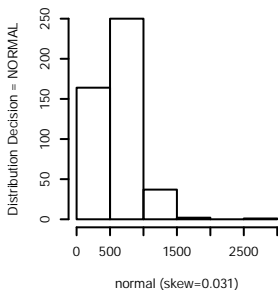

M3\_29880

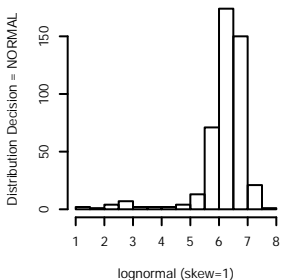

M3\_26923

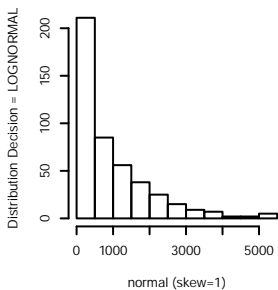

M3\_26923

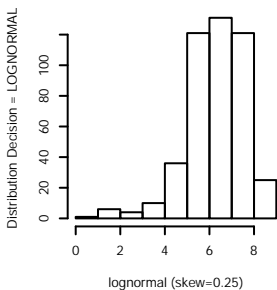

M3\_28583

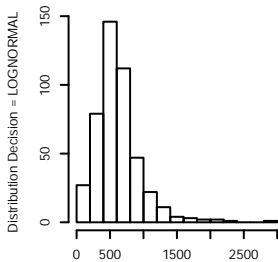

M3\_28583

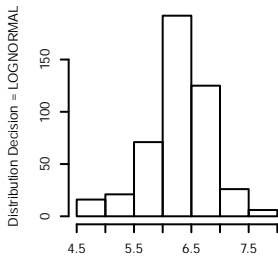

M3\_37474

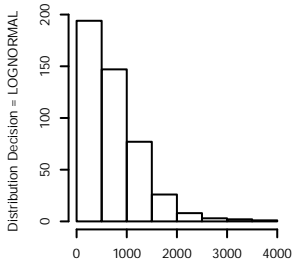

M3\_37474

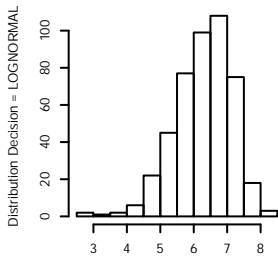

M3\_39966

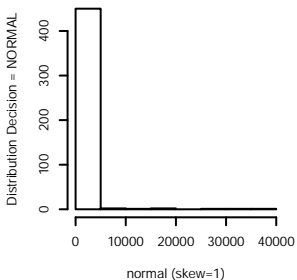

M3\_39966

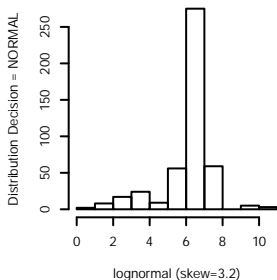

M3\_11888

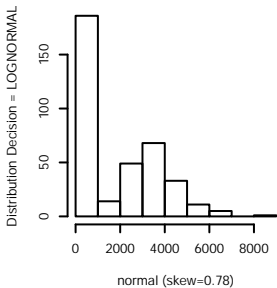

M3\_11888

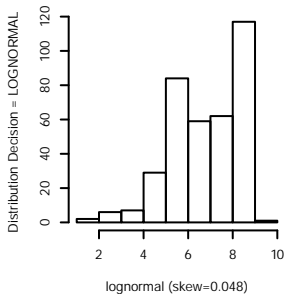



M3\_19484

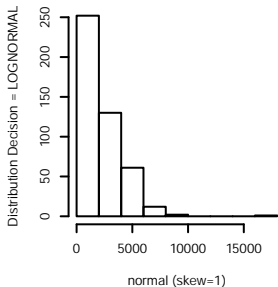

M3\_19484

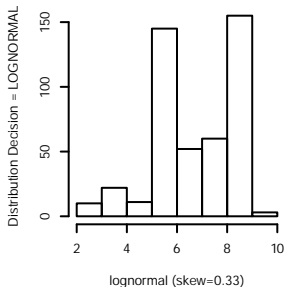

M3\_24551

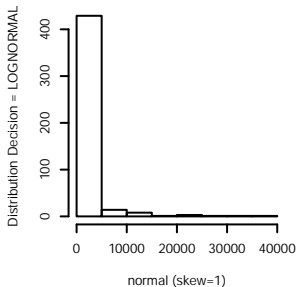

M3\_24551

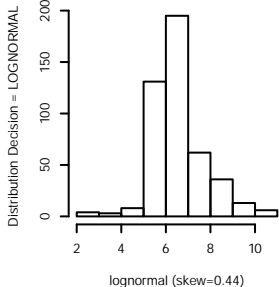

M3\_40257

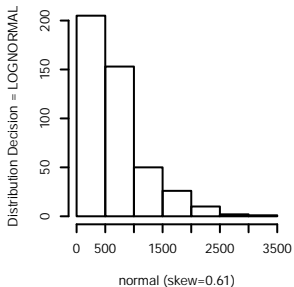

M3\_40257

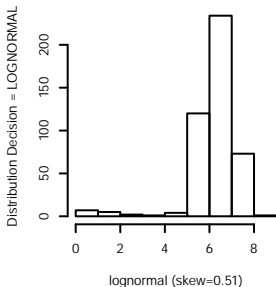

M3\_37804

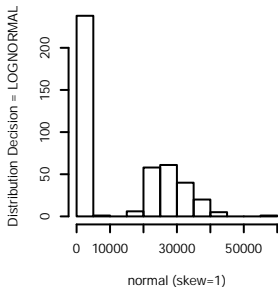

M3\_37804

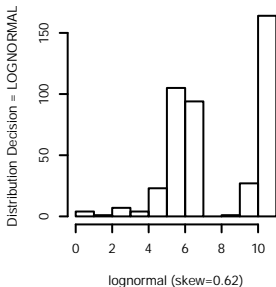

M3\_26908

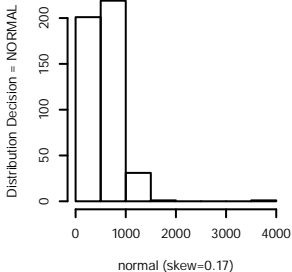

M3\_26908

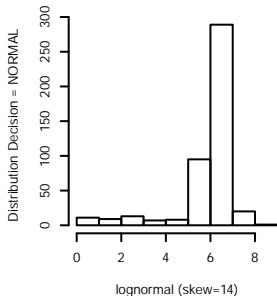

M3\_15504

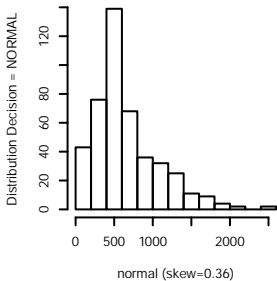

M3\_15504

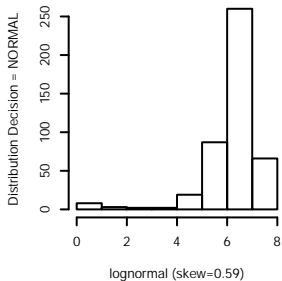

M3\_59447

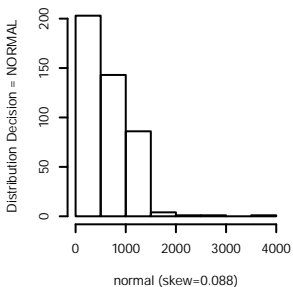

M3\_59447

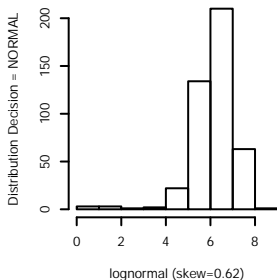

M3\_81148

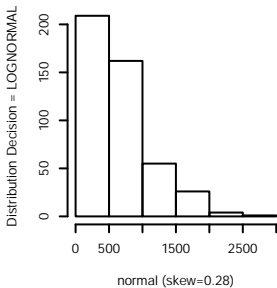

M3\_81148

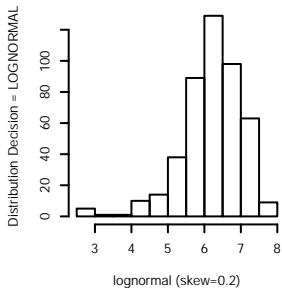

M3\_35678

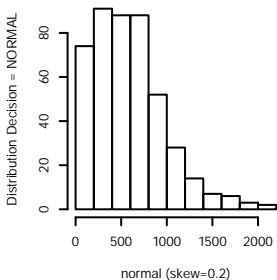

M3\_35678

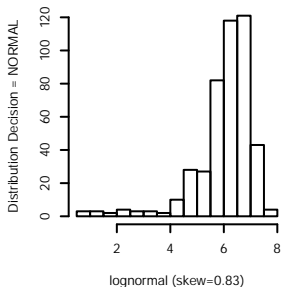

M3\_24350

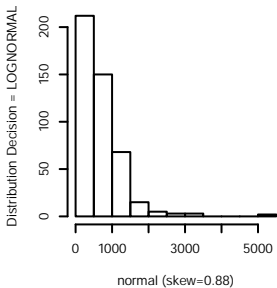

M3\_24350

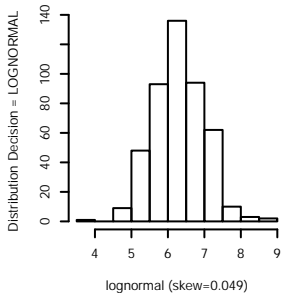

M3\_12279

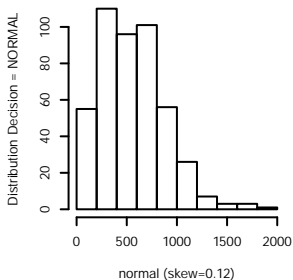

M3\_12279

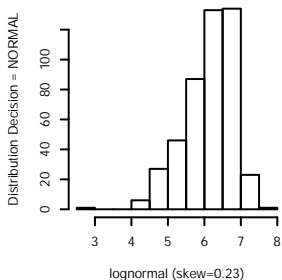

M3\_24859

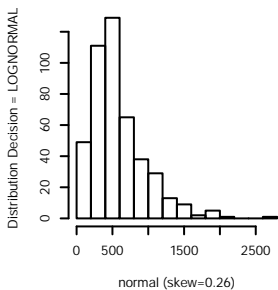

M3\_24859

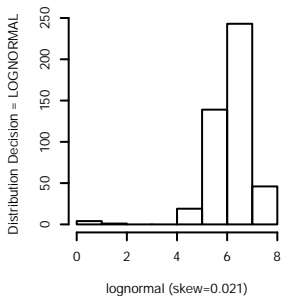

M3\_40264

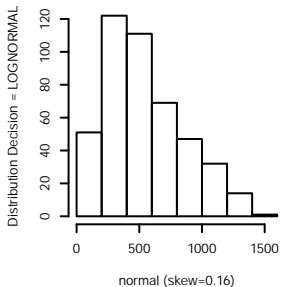

M3\_40264

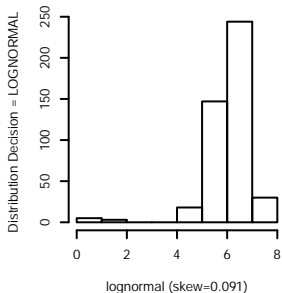

M3\_39186

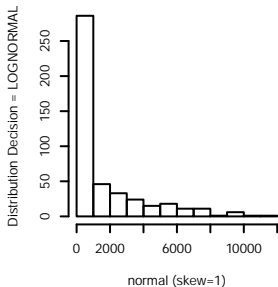

M3\_39186

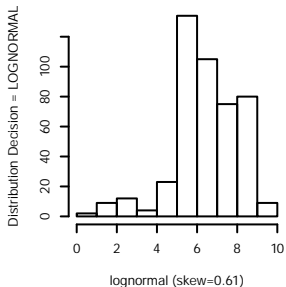

M3\_23865

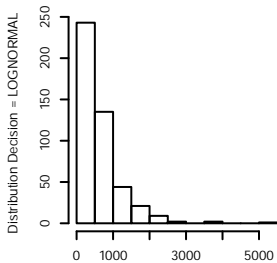

M3\_23865

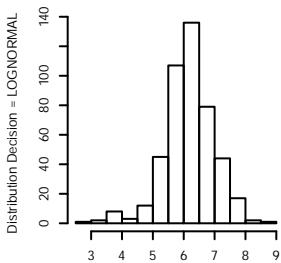

M3\_99199

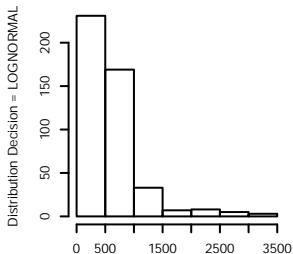

M3\_99199

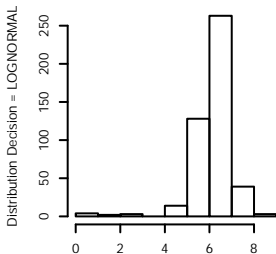



M3\_31850

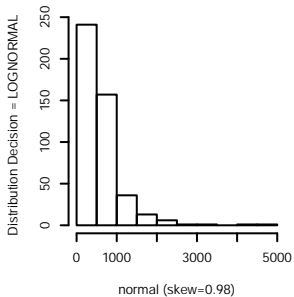

M3\_31850

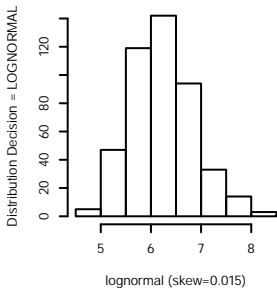

M3\_99216

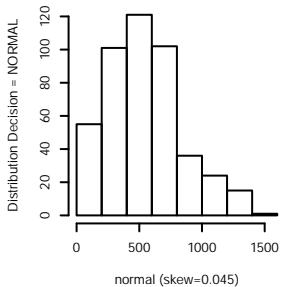

M3\_99216

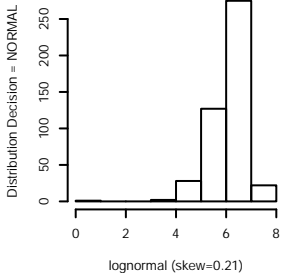

M3\_99158

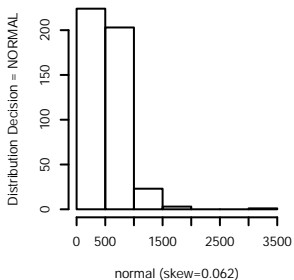

M3\_99158

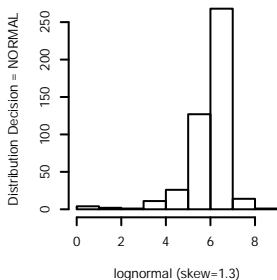

M3\_13143

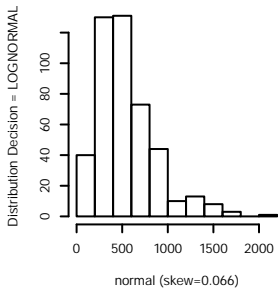

M3\_13143

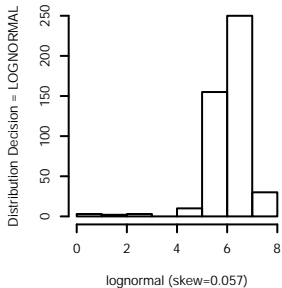

M3\_20946

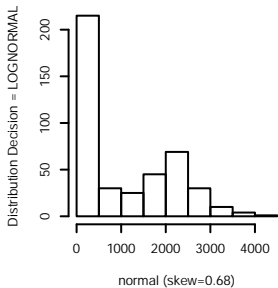

M3\_20946

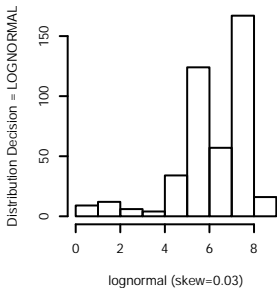

M3\_68506

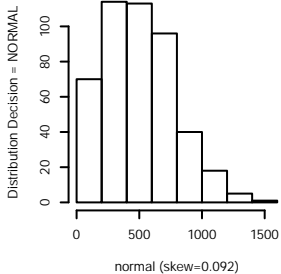

M3\_68506

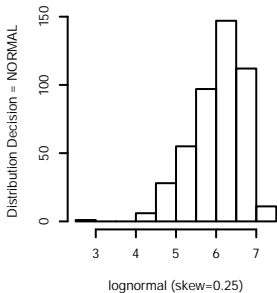

M3\_26927

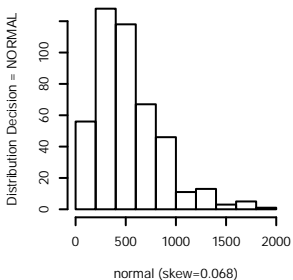

M3\_26927

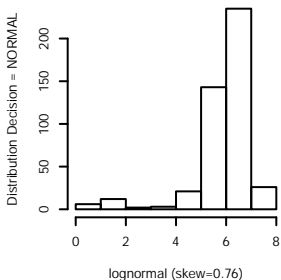

M3\_80247

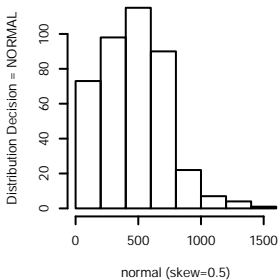

M3\_80247

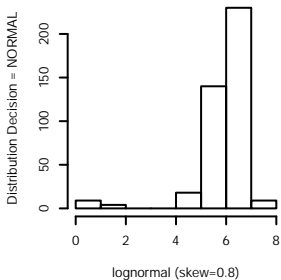

M3\_94991

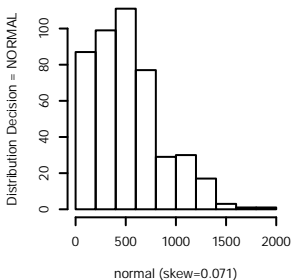

M3\_94991

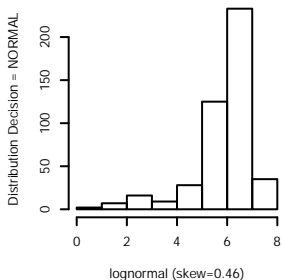

M3\_62626

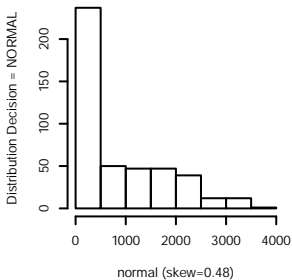

M3\_62626

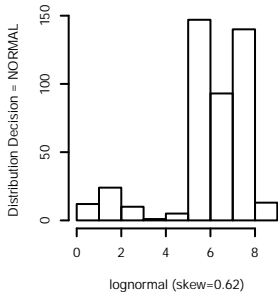

M3\_67805

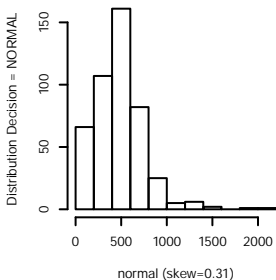

M3\_67805

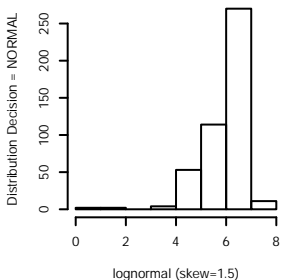

M3\_65844

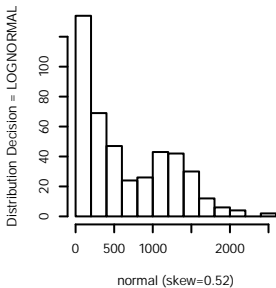

M3\_65844

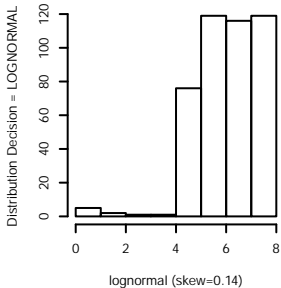

M3\_23505

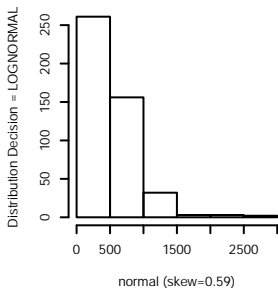

M3\_23505

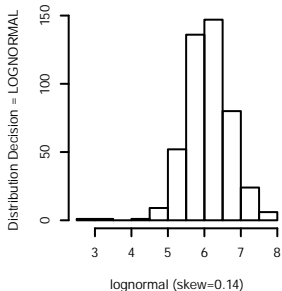

M3\_70909

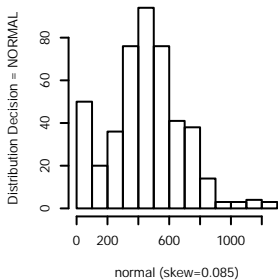

M3\_70909

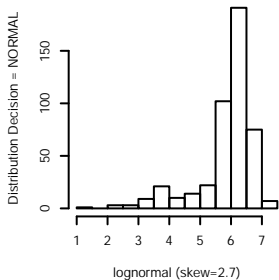

M3\_70407

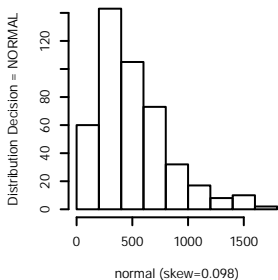

M3\_70407

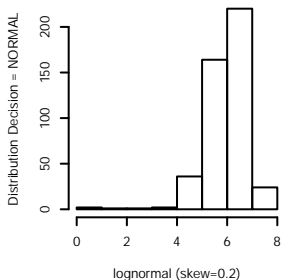

M3\_81108

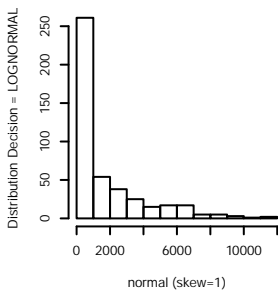

M3\_81108

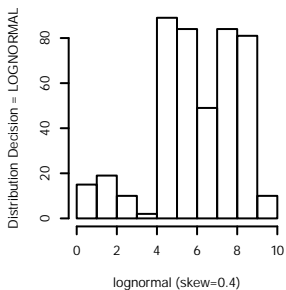



M3\_25427

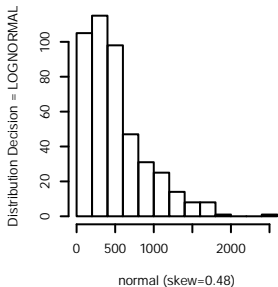

M3\_25427

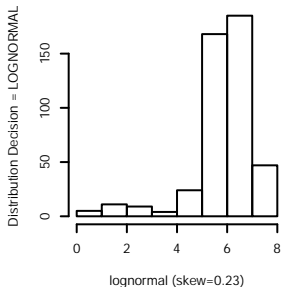

M3\_56957

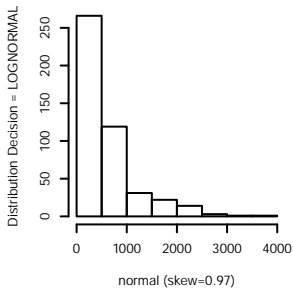

M3\_56957

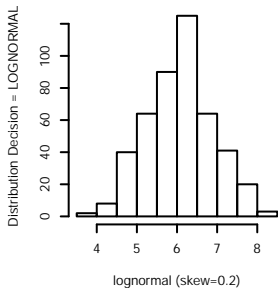

M3\_74386

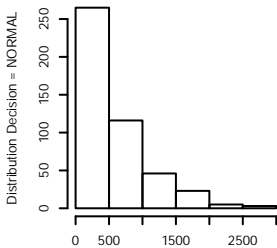

normal (skew=0.09)

M3\_74386

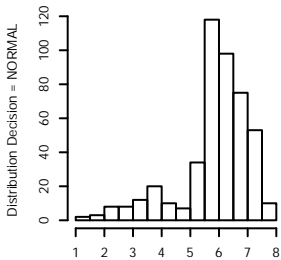

lognormal (skew=0.23)

M3\_23597

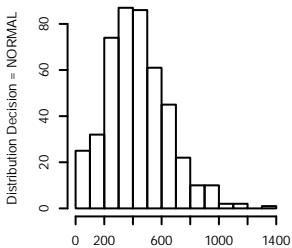

normal (skew=0.059)

M3\_23597

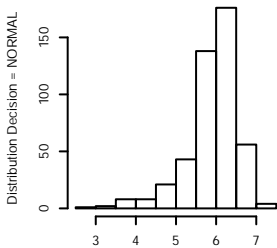

lognormal (skew=0.1)

M3\_28018

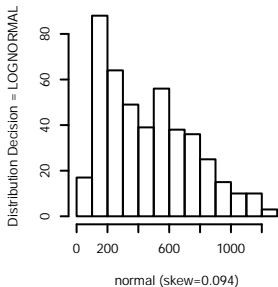

M3\_28018

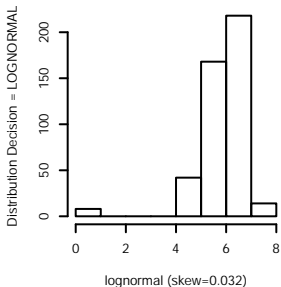

M3\_23790

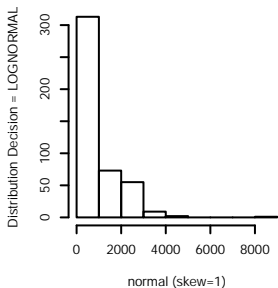

M3\_23790

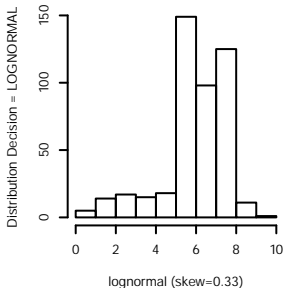

M3\_19709

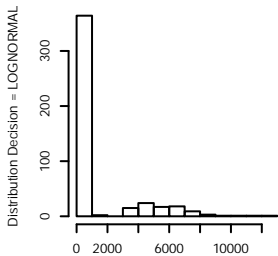

M3\_19709

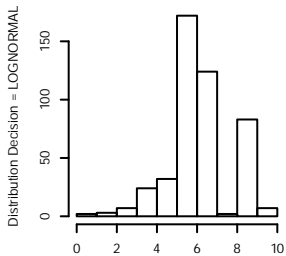

M3\_99553

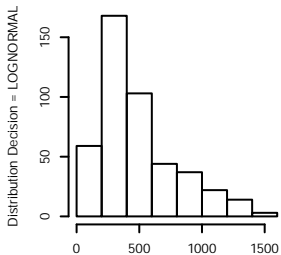

M3\_99553

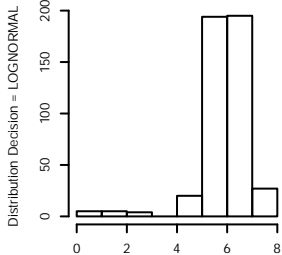

M3\_16746

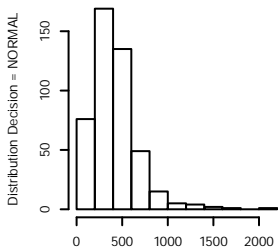

normal (skew=0.13)

M3\_16746

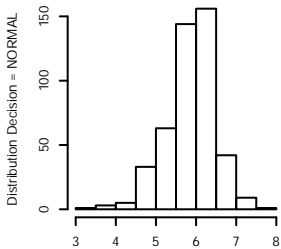

lognormal (skew=0.33)

M3\_25262

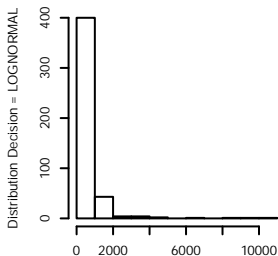

normal (skew=1)

M3\_25262

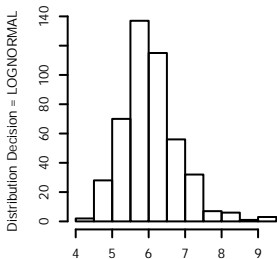

lognormal (skew=0.029)

M3\_38075

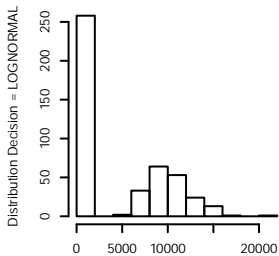

normal (skew=1)

M3\_38075

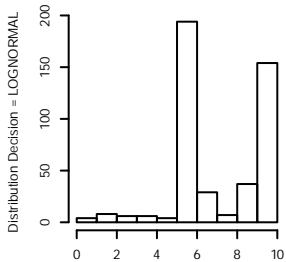

lognormal (skew=0.8)

M3\_23809

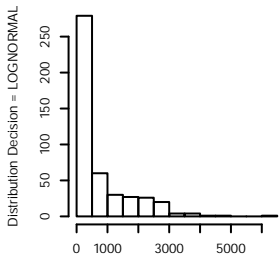

normal (skew=1)

M3\_23809

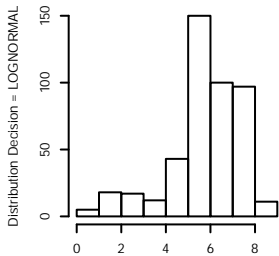

lognormal (skew=0.36)

M3\_28147

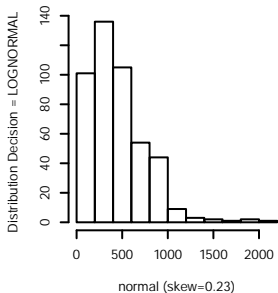

M3\_28147

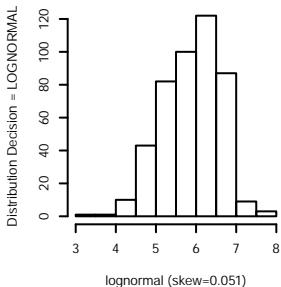

M3\_17346

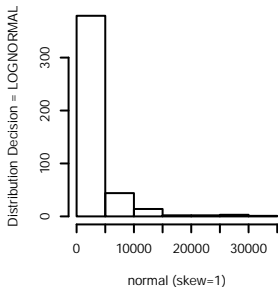

M3\_17346

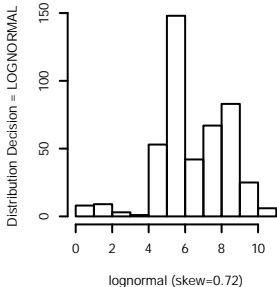

M3\_00484

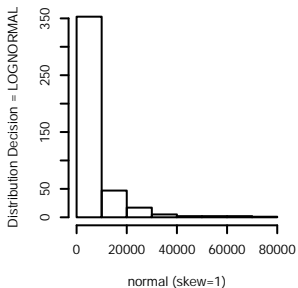

M3\_00484

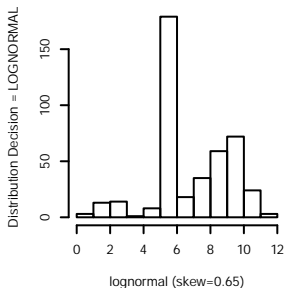

M3\_25283

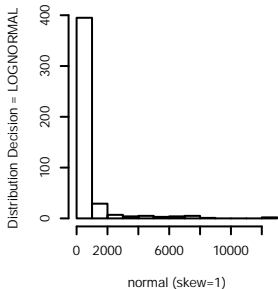

M3\_25283

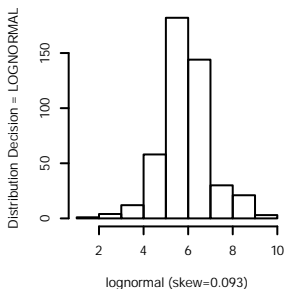



M3\_17225

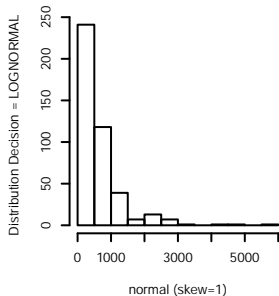

M3\_17225

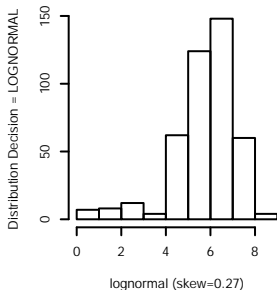

M3\_93097

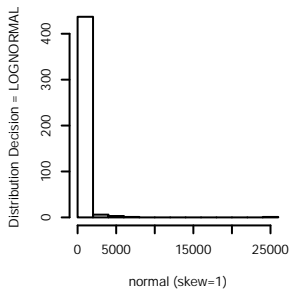

M3\_93097

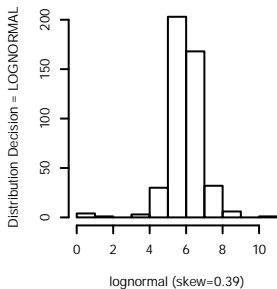

M3\_66053

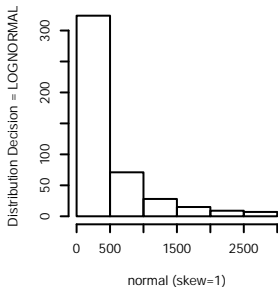

M3\_66053

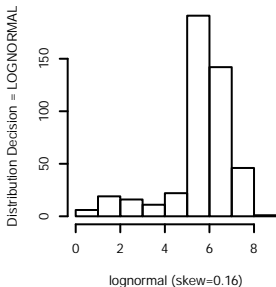

M3\_39995

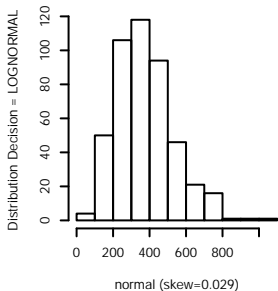

M3\_39995

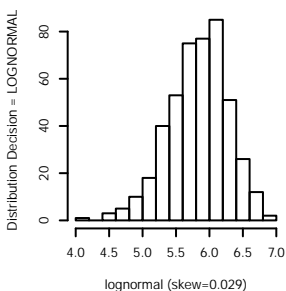

M3\_23993

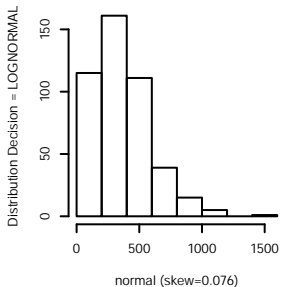

M3\_23993

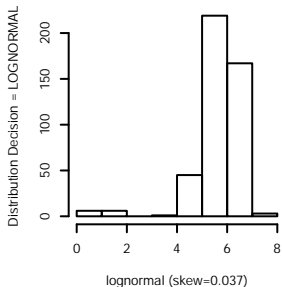

M3\_23618

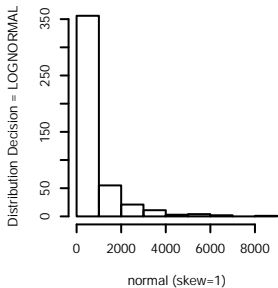

M3\_23618

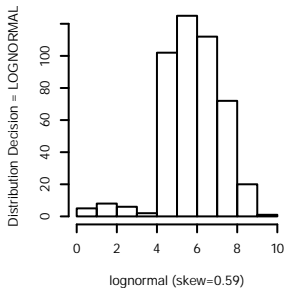

M3\_41310

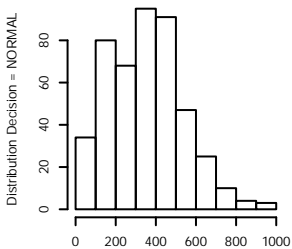

M3\_41310

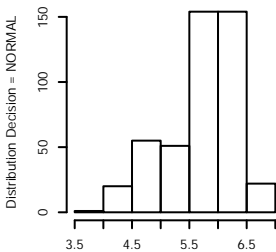

M3\_62786

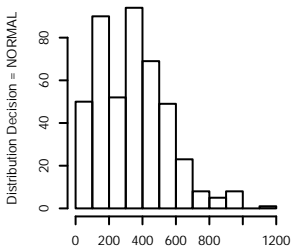

M3\_62786

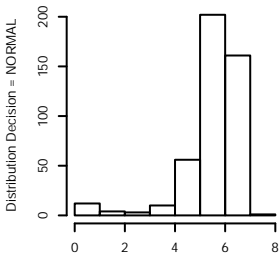

M3\_12022

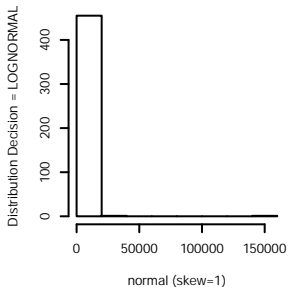

M3\_12022

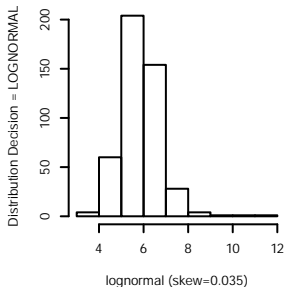

M3\_99211

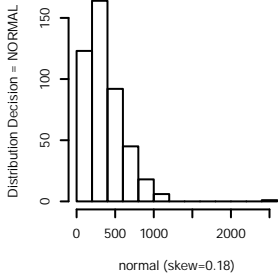

M3\_99211

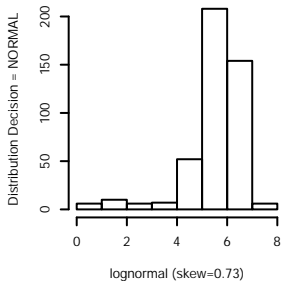

M3\_41881

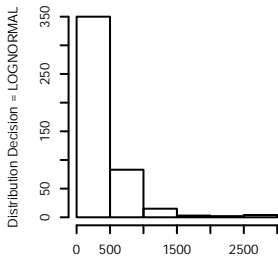

normal (skew=0.86)

M3\_41881

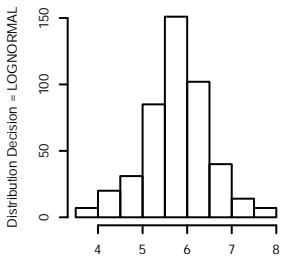

lognormal (skew=0.032)

M3\_40432

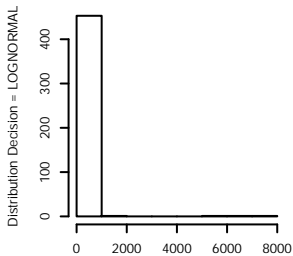

normal (skew=1)

M3\_40432

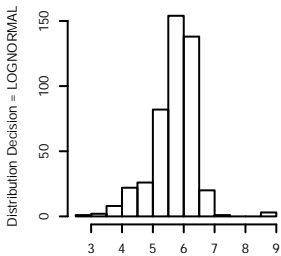

lognormal (skew=0.48)

M3\_13193

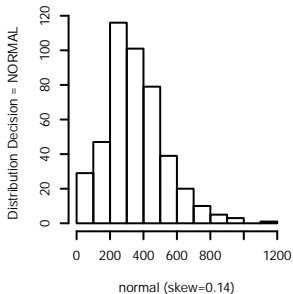

M3\_13193

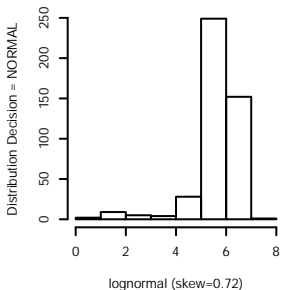

M3\_95003

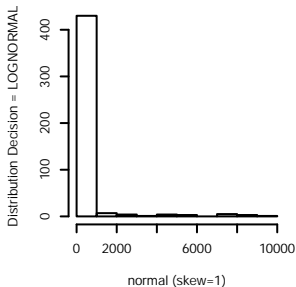

M3\_95003

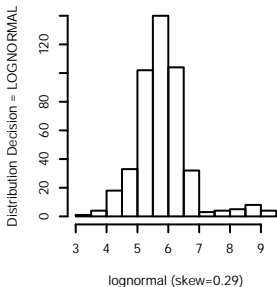

M3\_01862

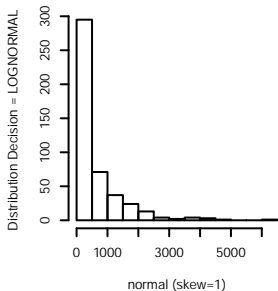

M3\_01862

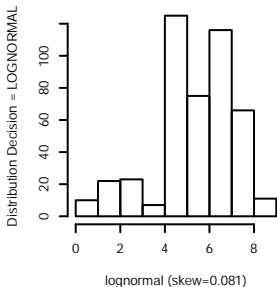

M3\_19779

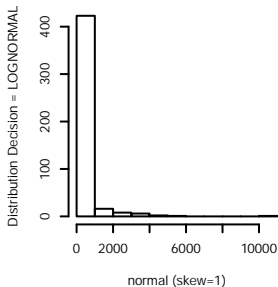

M3\_19779

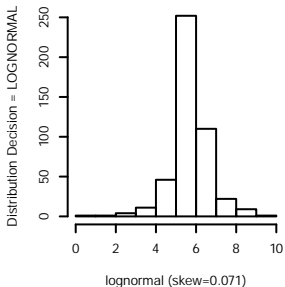



M3\_08611

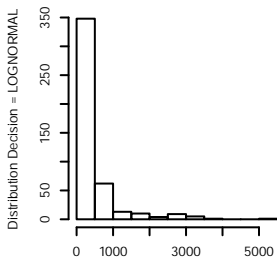

normal (skew=1)

M3\_08611

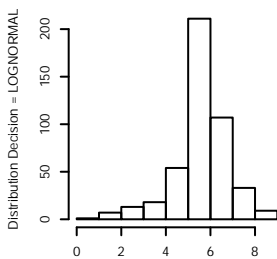

lognormal (skew=0.13)

M3\_27387

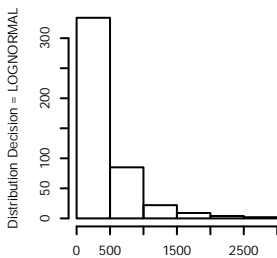

normal (skew=0.96)

M3\_27387

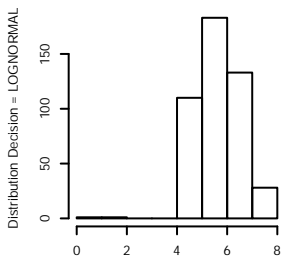

lognormal (skew=0.16)

M3\_41572

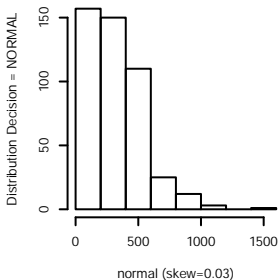

M3\_41572

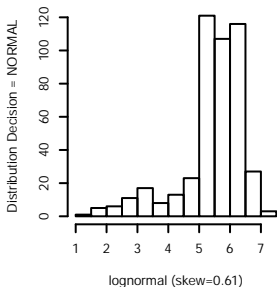

M3\_09708

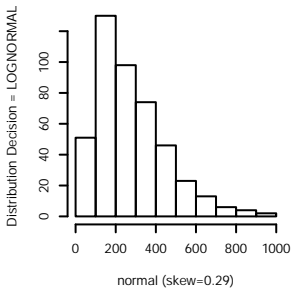

M3\_09708

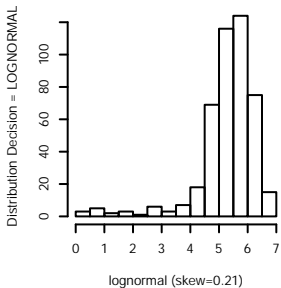

M3\_25539

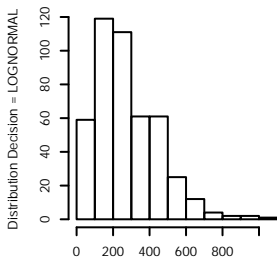

normal (skew=0.16)

M3\_25539

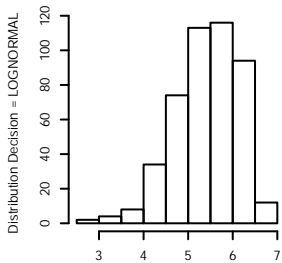

lognormal (skew=0.027)

M3\_39490

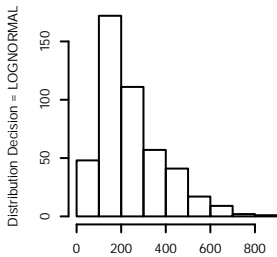

normal (skew=0.32)

M3\_39490

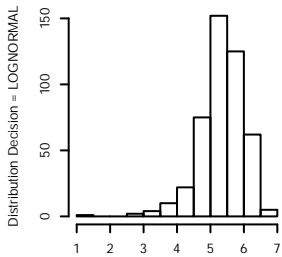

lognormal (skew=0.24)

M3\_39485

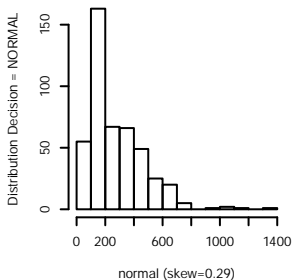

M3\_39485

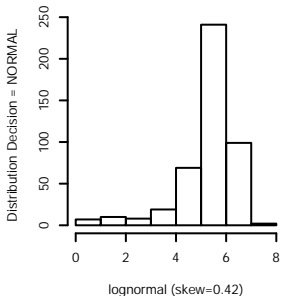

M3\_81131

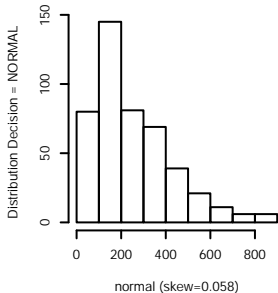

M3\_81131

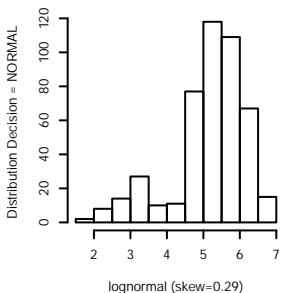

M3\_56938

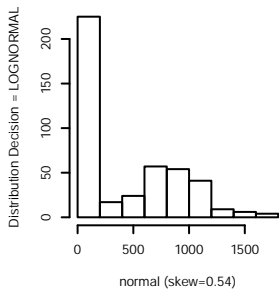

M3\_56938

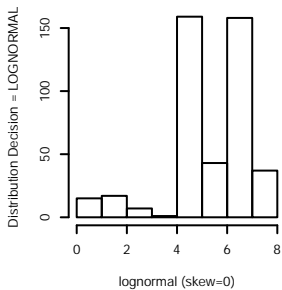

Supplement: PSP4-4-669-s003.pdf [file PSP4-4-669-s003.pdf]
