# Supplementary material for: Pharmacometabolomic Assessments of Atenolol and Hydrochlorothiazide Treatment Reveal Novel Drug Response Phenotypes
Source: PubMed Central journal article supplement — CPT Pharmacometrics Syst Pharmacol. 2015 Oct 29;4(11):669–79. doi: 10.1002/psp4.12017 (PMC4716583; doi:10.1002/psp4.12017), 2015-10-29

M5\_glucose

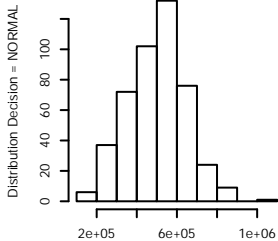

M5\_glucose

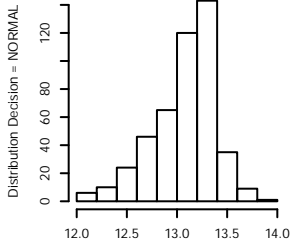

M5\_stearic\_acid

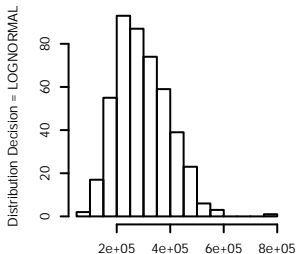

M5\_stearic\_acid

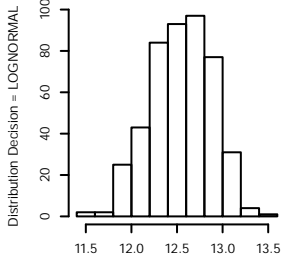

M5\_alanine

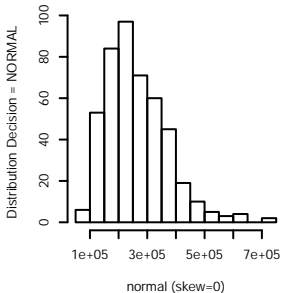

M5\_alanine

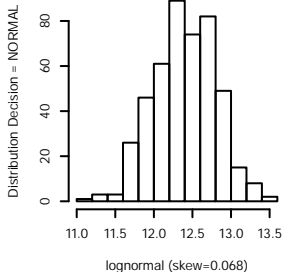

M5\_cholesterol

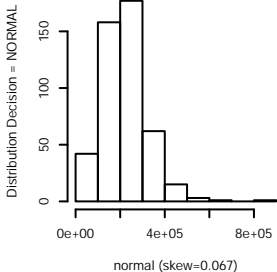

M5\_cholesterol

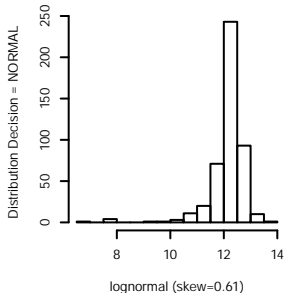

M5\_valine

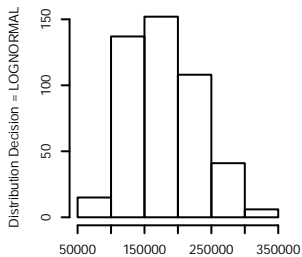

normal (skew=0.085)

M5\_valine

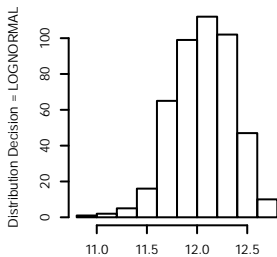

lognormal (skew=0.074)

M5\_glycine

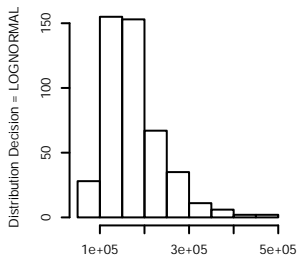

normal (skew=0.27)

M5\_glycine

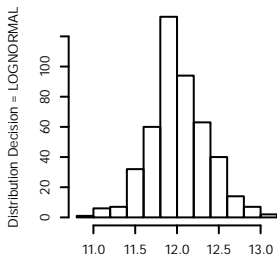

lognormal (skew=0.14)

M5\_glutamine

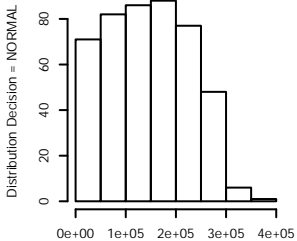

normal (skew=0.023)

M5\_glutamine

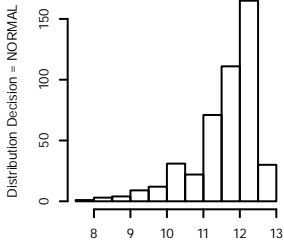

lognormal (skew=1.2)

M5\_lactic\_acid

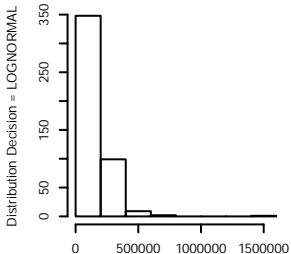

normal (skew=0.47)

M5\_lactic\_acid

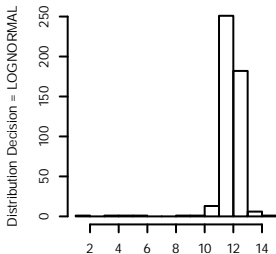

lognormal (skew=0.12)

M5\_urea

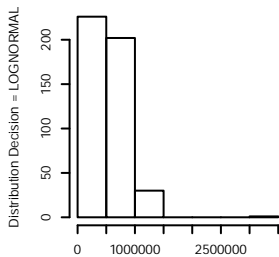

normal (skew=0.21)

M5\_urea

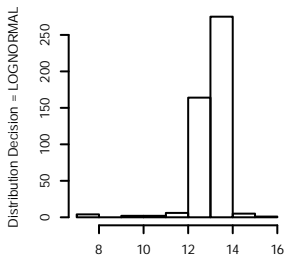

lognormal (skew=0.17)

M5\_oxoproline

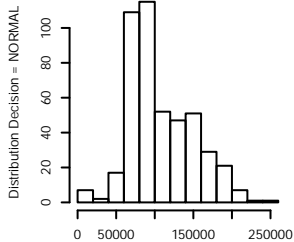

normal (skew=0.53)

M5\_oxoproline

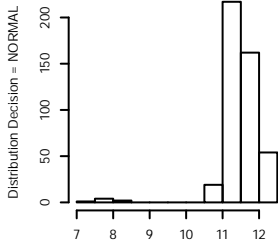

lognormal (skew=0.65)

M5\_phosphoric\_acid

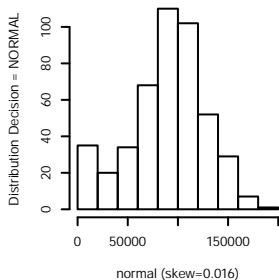

M5\_phosphoric\_acid

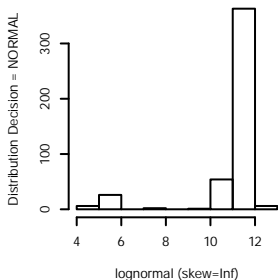

M5\_leucine

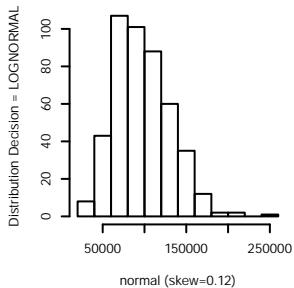

M5\_leucine

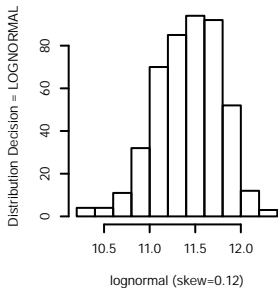

M5\_tyrosine

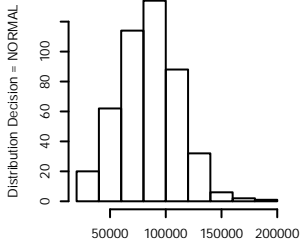

normal (skew=0.11)

M5\_tyrosine

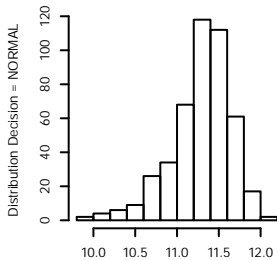

lognormal (skew=0.21)

M5\_glycerol

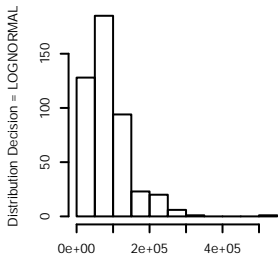

normal (skew=0.53)

M5\_glycerol

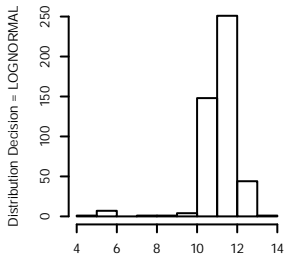

lognormal (skew=0.46)

M5\_5\_anhydroglucitol

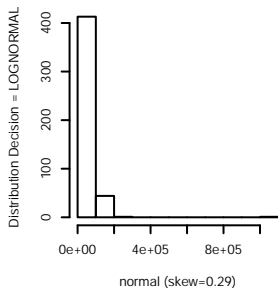

M5\_5\_anhydroglucitol

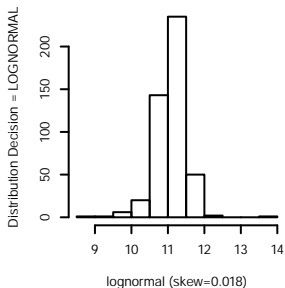

M5\_tryptophan

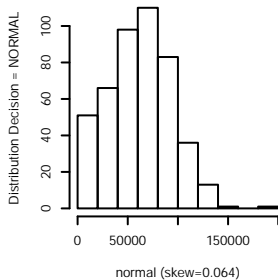

M5\_tryptophan

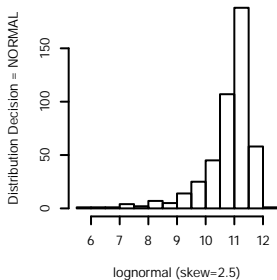



M5\_citric\_acid

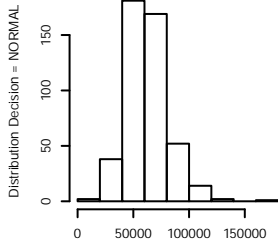

normal (skew=0.033)

M5\_citric\_acid

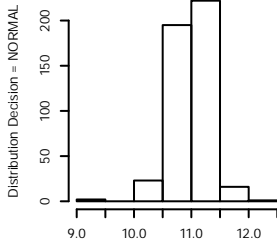

lognormal (skew=0.034)

M5\_isoleucine

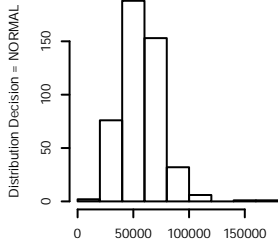

normal (skew=0.11)

M5\_isoleucine

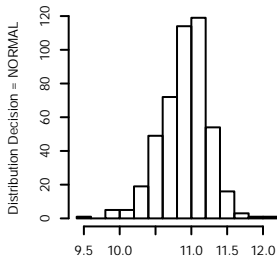

lognormal (skew=0.12)

M5\_uric\_acid

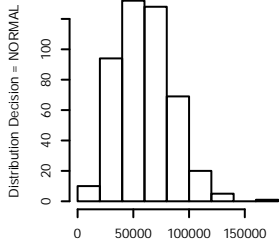

normal (skew=0.22)

M5\_uric\_acid

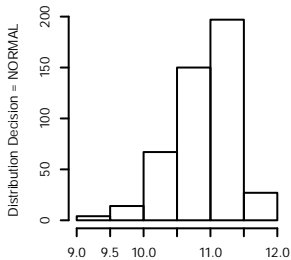

lognormal (skew=0.26)

M5\_threonine

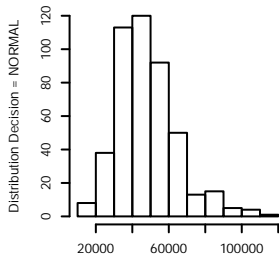

normal (skew=0.067)

M5\_threonine

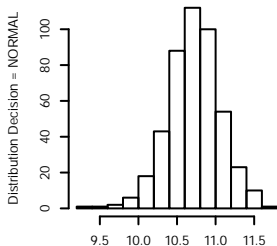

lognormal (skew=0.13)

M5\_lysine

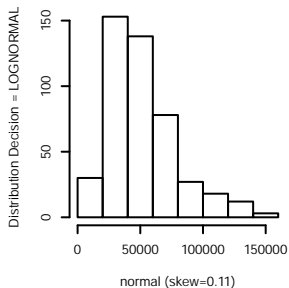

M5\_lysine

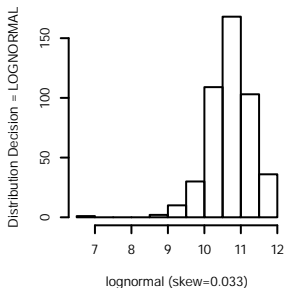

M5\_serine

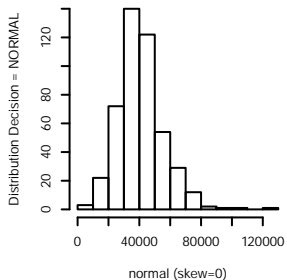

M5\_serine

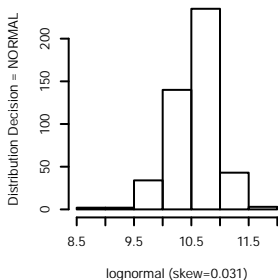

M5\_palmitic\_acid

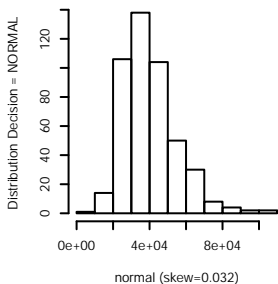

M5\_palmitic\_acid

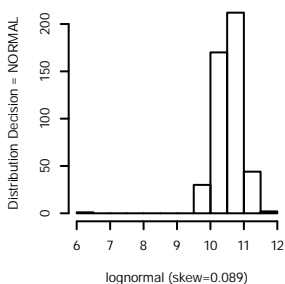

M5\_proline

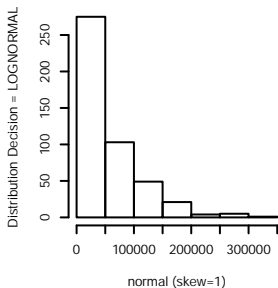

M5\_proline

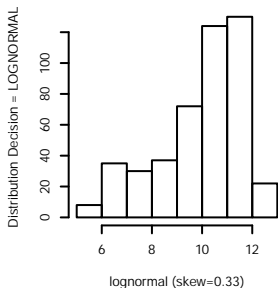

M5\_ornithine

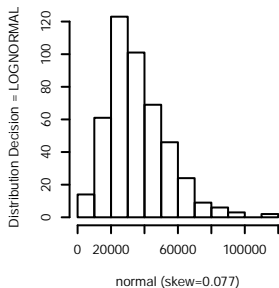

M5\_ornithine

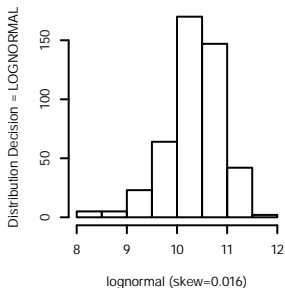

M5\_hydroxybutanoic\_acid

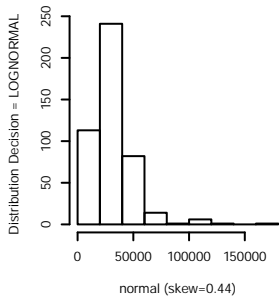

M5\_hydroxybutanoic\_acid

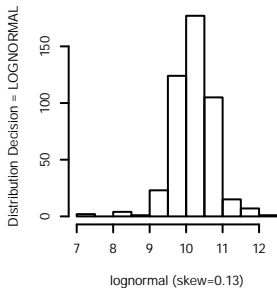

M5\_phenylalanine

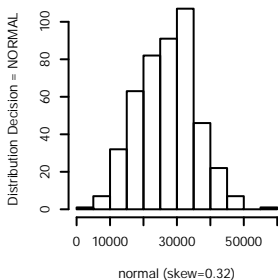

M5\_phenylalanine

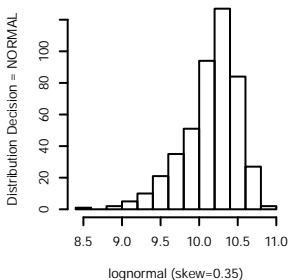

M5\_pelargonic\_acid

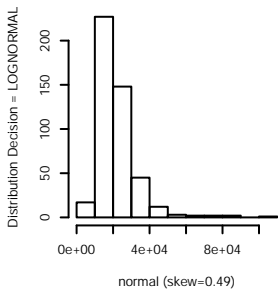

M5\_pelargonic\_acid

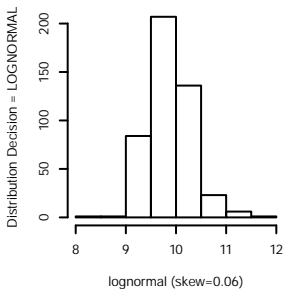

M5\_histidine

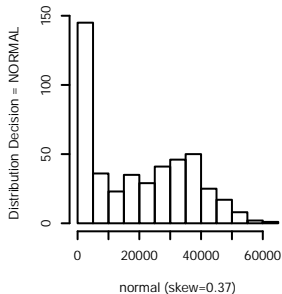

M5\_histidine

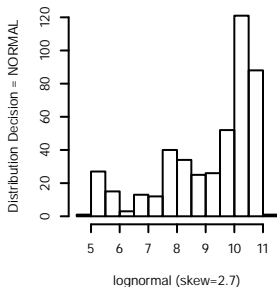

M5\_inositol\_myo\_

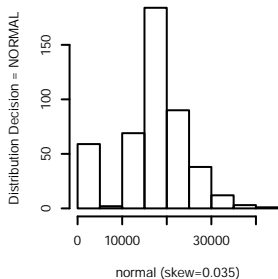

M5\_inositol\_myo\_

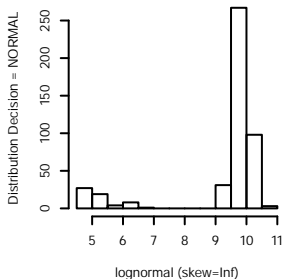

M5\_glutamic\_acid

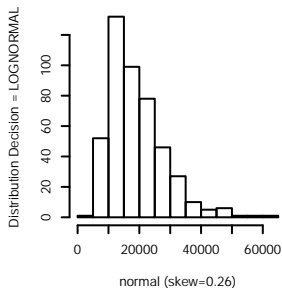

M5\_glutamic\_acid

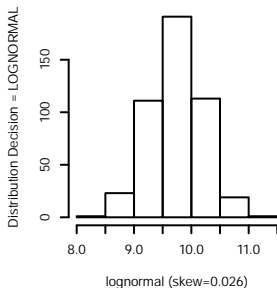

M5\_n\_methylalanine

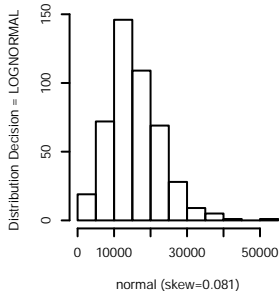

M5\_n\_methylalanine

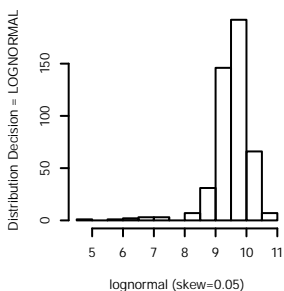



M5\_benzoic\_acid

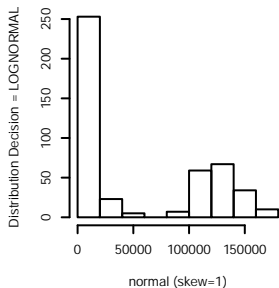

M5\_benzoic\_acid

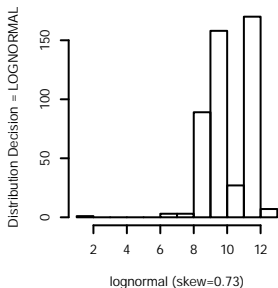

M5\_lauric\_acid

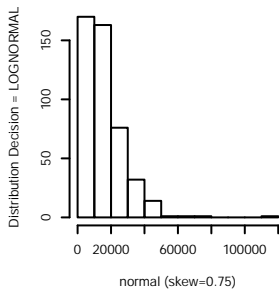

M5\_lauric\_acid

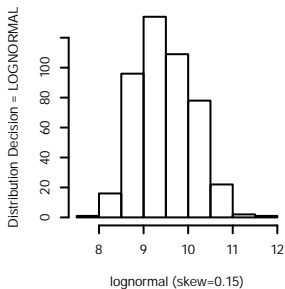

M5\_pentadecanoic\_acid

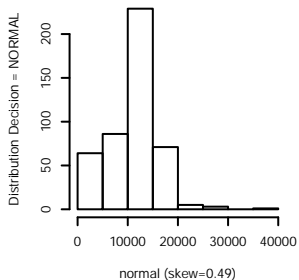

M5\_pentadecanoic\_acid

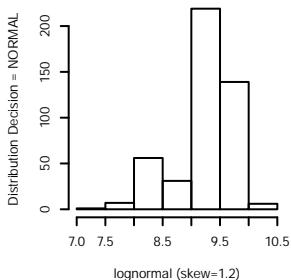

M5\_beta\_mannosylglycerate

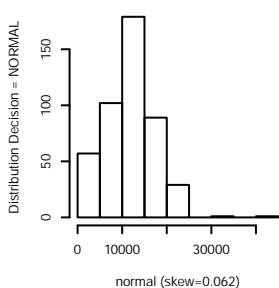

M5\_beta\_mannosylglycerate

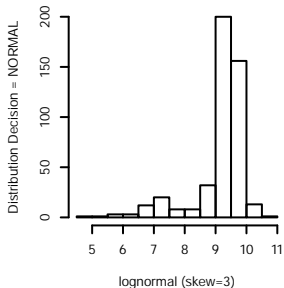

M5\_talose

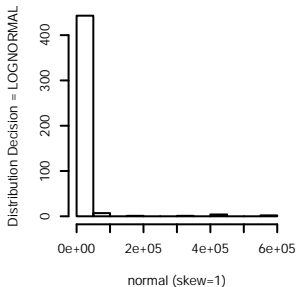

M5\_talose

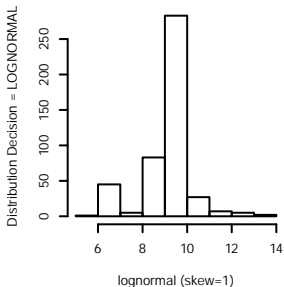

M5\_iminodiacetic\_acid

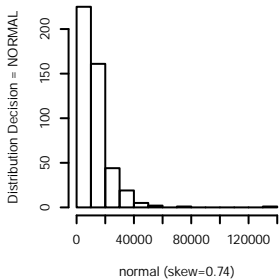

M5\_iminodiacetic\_acid

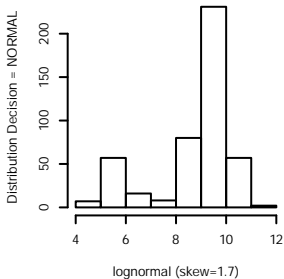

M5\_hydroxybutanoic\_acid\_1

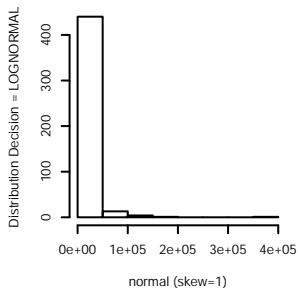

M5\_hydroxybutanoic\_acid\_1

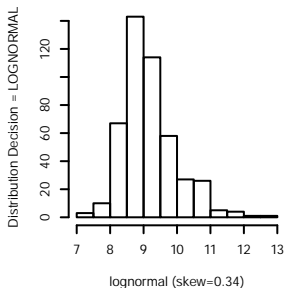

M5\_oleic\_acid

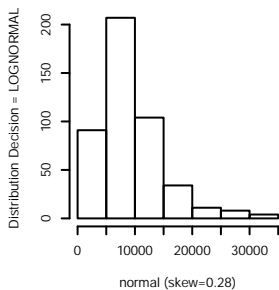

M5\_oleic\_acid

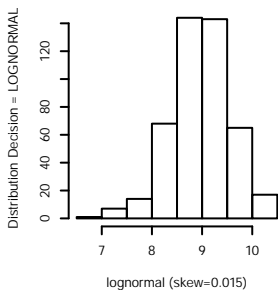

M5\_glyceric\_acid

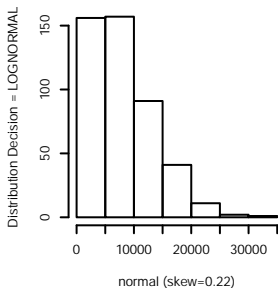

M5\_glyceric\_acid

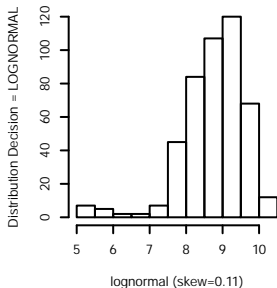

M5\_creatinine

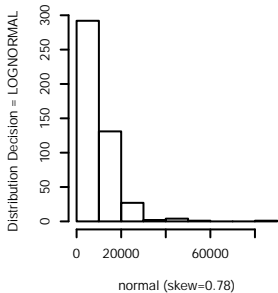

M5\_creatinine

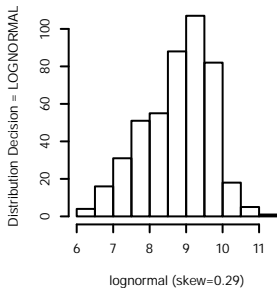

M5\_ketoisocaproic\_acid

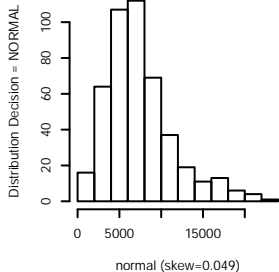

M5\_ketoisocaproic\_acid

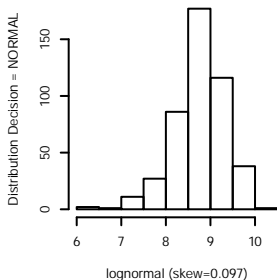

M5\_asparagine

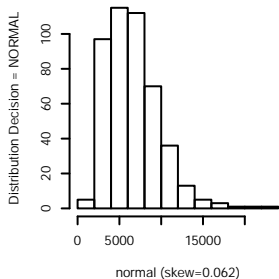

M5\_asparagine

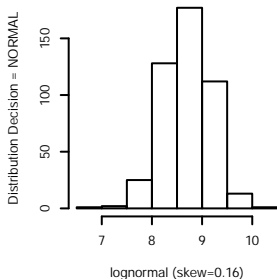

M5\_\_monoolein

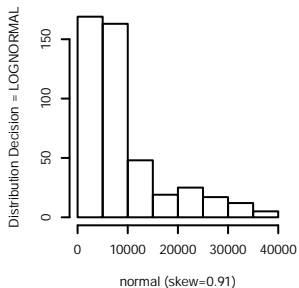

M5\_\_monoolein

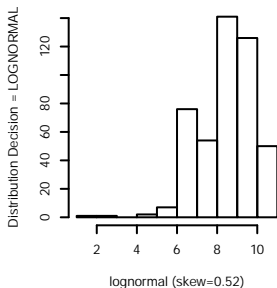

M5\_\_cystine

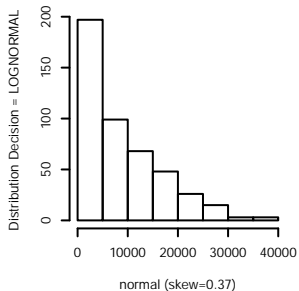

M5\_\_cystine

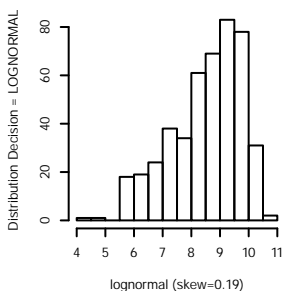

M5\_acetophenone\_nist

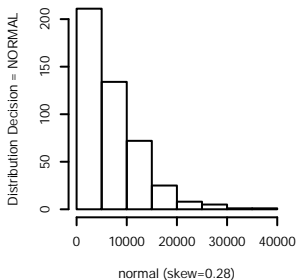

M5\_acetophenone\_nist

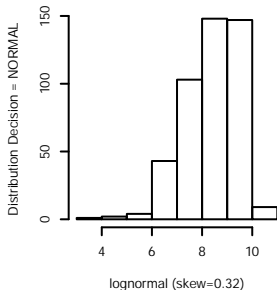

M5\_fructose

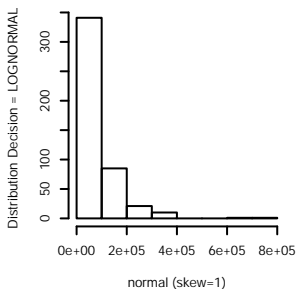

M5\_fructose

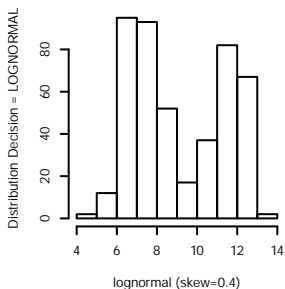



M5\_methylhexadecanoic\_acid

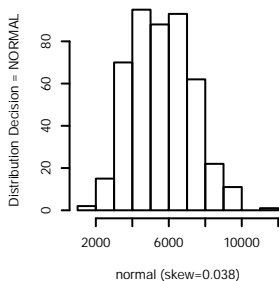

M5\_methylhexadecanoic\_acid

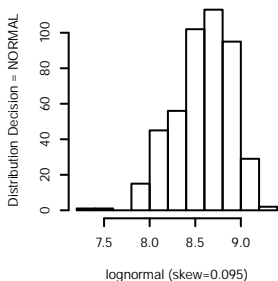

M5\_methionine

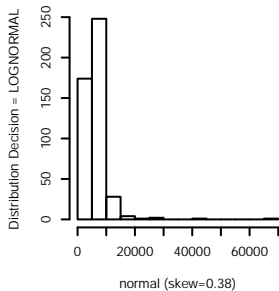

M5\_methionine

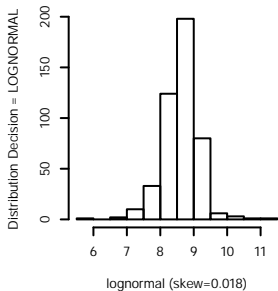

M5\_ketoadipic\_acid

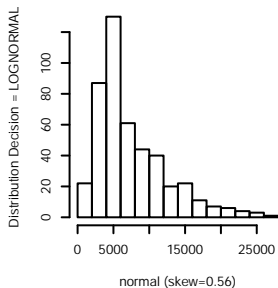

M5\_ketoadipic\_acid

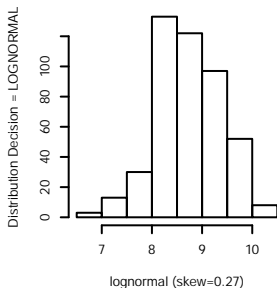

M5\_tocopherol\_alpha

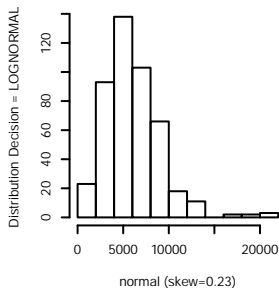

M5\_tocopherol\_alpha

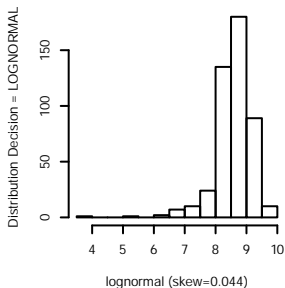

M5\_capric\_acid

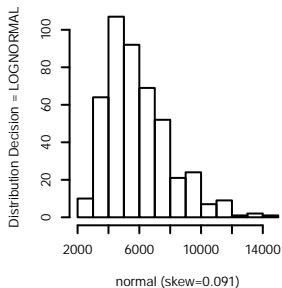

M5\_capric\_acid

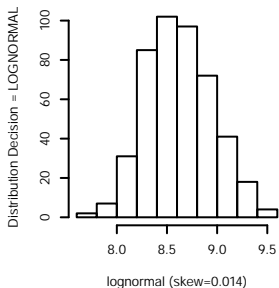

M5\_arachidic\_acid

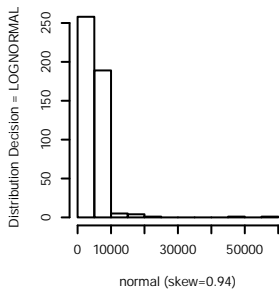

M5\_arachidic\_acid

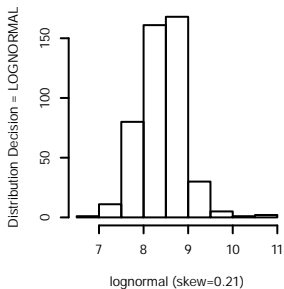

M5\_deoxyglucitol\_nist

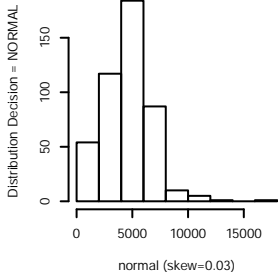

M5\_deoxyglucitol\_nist

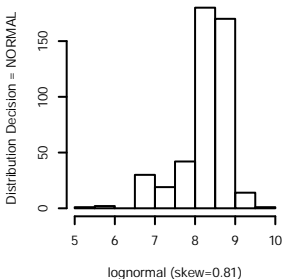

M5\_diacetone\_alcohol\_nist

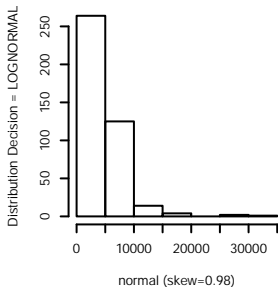

M5\_diacetone\_alcohol\_nist

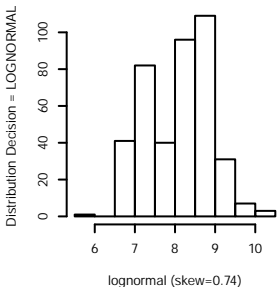

M5\_palmitoleic\_acid

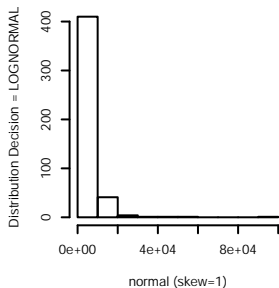

M5\_palmitoleic\_acid

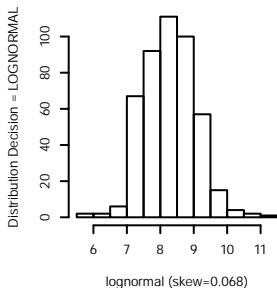

M5\_hydroxyvaleric\_acid

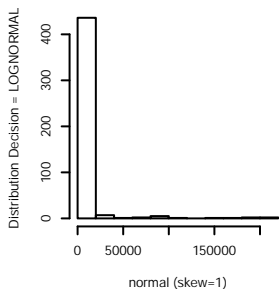

M5\_hydroxyvaleric\_acid

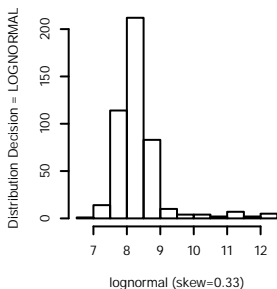

M5\_hydroxylamine

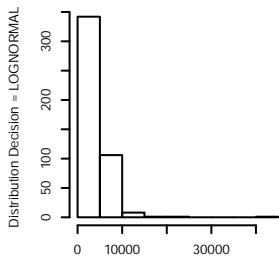

normal (skew=0.44)

M5\_hydroxylamine

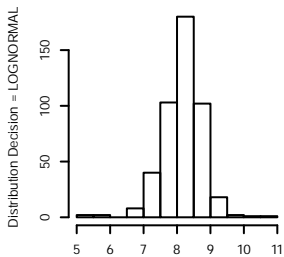

lognormal (skew=0.035)

M5\_myristic\_acid

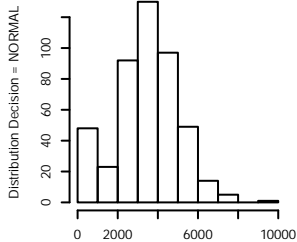

normal (skew=0.094)

M5\_myristic\_acid

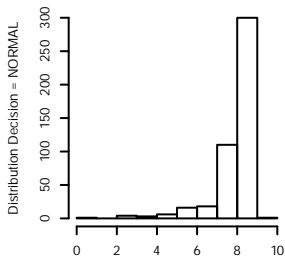

lognormal (skew=15)

M5\_methionine\_sulfoxide

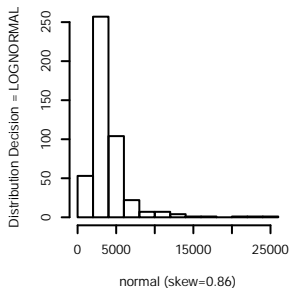

M5\_methionine\_sulfoxide

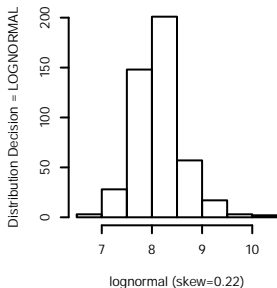

M5\_nicotinic\_acid

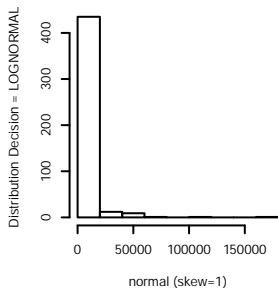

M5\_nicotinic\_acid

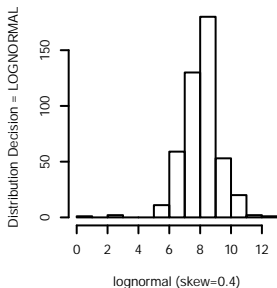

M5\_aminomalonic\_acid

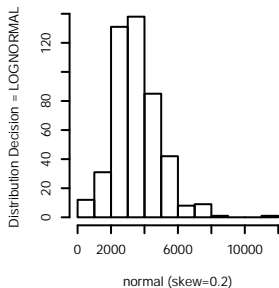

M5\_aminomalonic\_acid

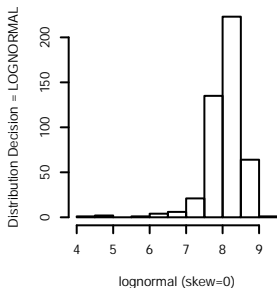

M5\_hydroxypropionic\_acid

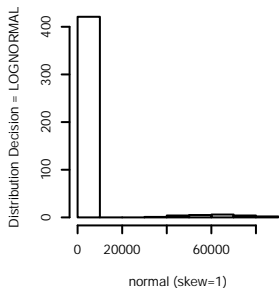

M5\_hydroxypropionic\_acid

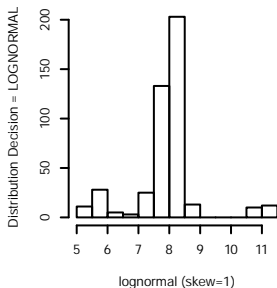



M5\_linoleic\_acid

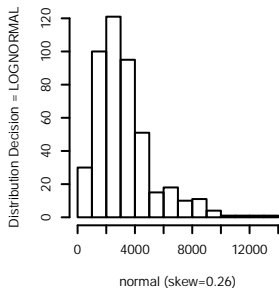

M5\_linoleic\_acid

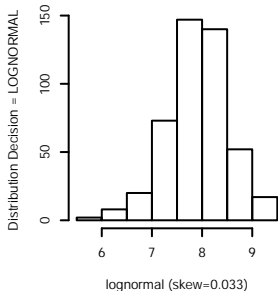

M5\_phenol

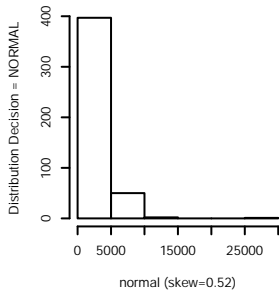

M5\_phenol

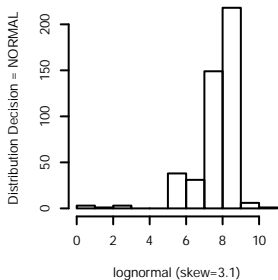

M5\_pseudo\_uridine

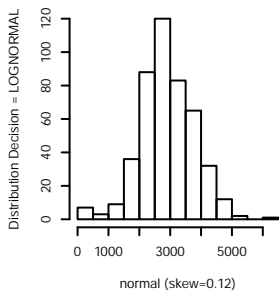

M5\_pseudo\_uridine

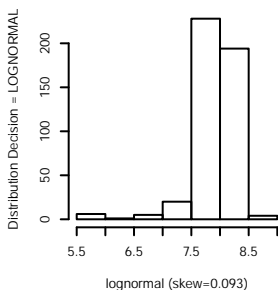

M5\_deoxytetriconic\_acid\_nist

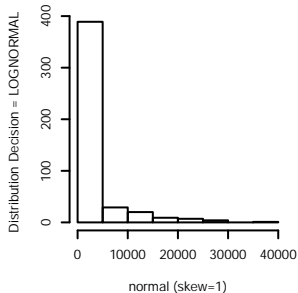

M5\_deoxytetriconic\_acid\_nist

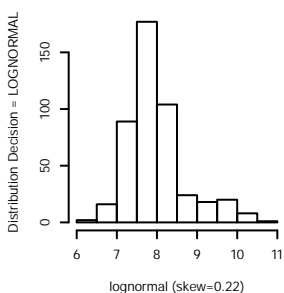

M5\_glycolic\_acid

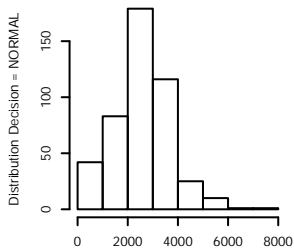

M5\_glycolic\_acid

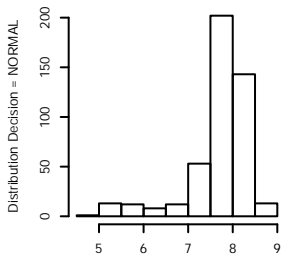

M5\_cysteine

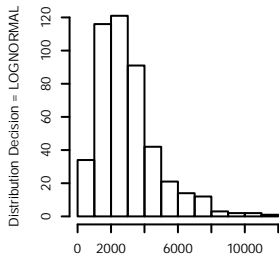

M5\_cysteine

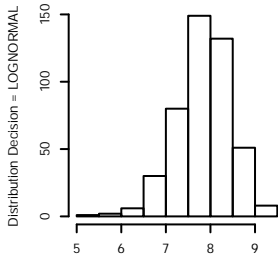

M5\_threonic\_acid

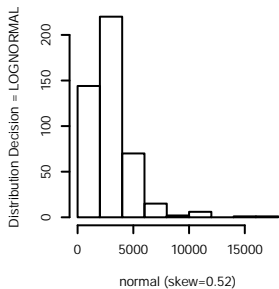

M5\_threonic\_acid

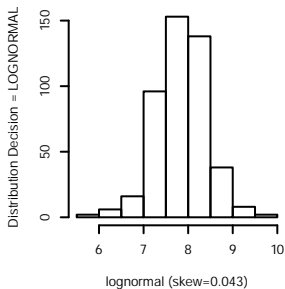

M5\_caprylic\_acid

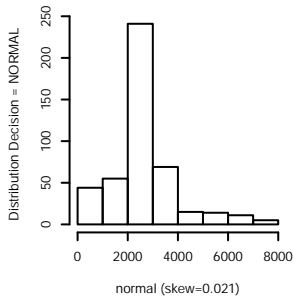

M5\_caprylic\_acid

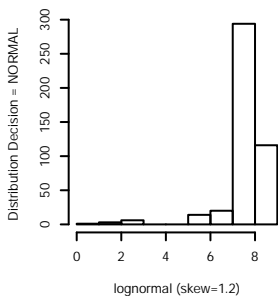

M5\_aspartic\_acid

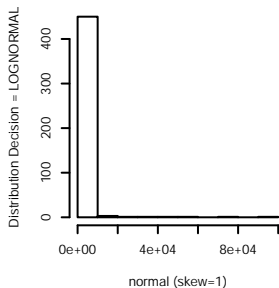

M5\_aspartic\_acid

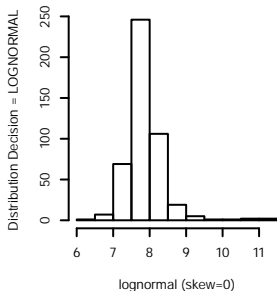

M5\_hydroxyproline

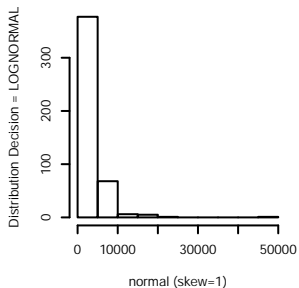

M5\_hydroxyproline

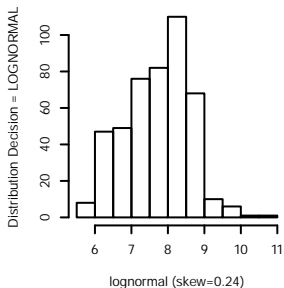

M5\_fucose\_\_rhamnose

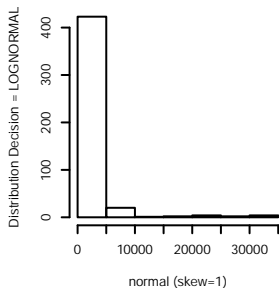

M5\_fucose\_\_rhamnose

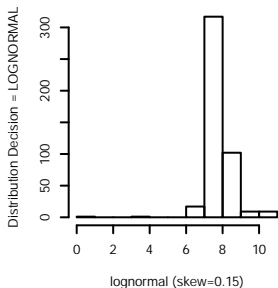

M5\_ethanolamine

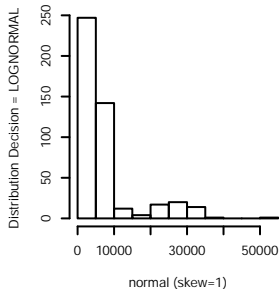

M5\_ethanolamine

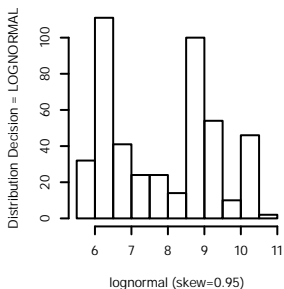

M5\_deoxyerythritol\_nist

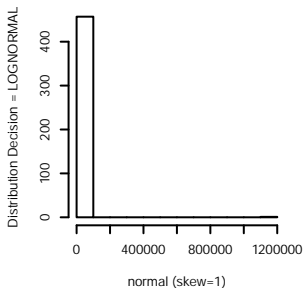

M5\_deoxyerythritol\_nist

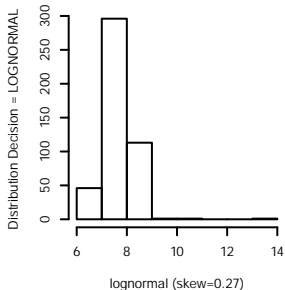

M5\_parabanic\_acid\_nist

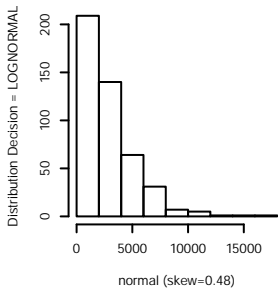

M5\_parabanic\_acid\_nist

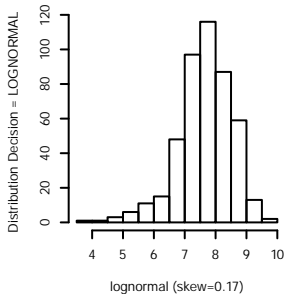

M5\_citrulline

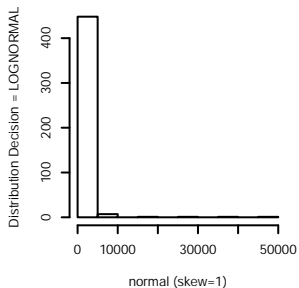

M5\_citrulline

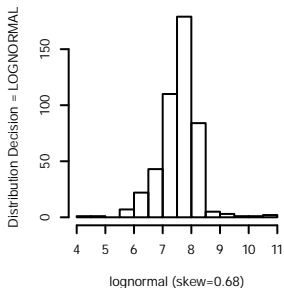

M5\_xylose

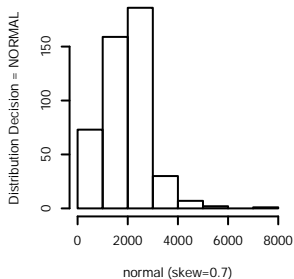

M5\_xylose

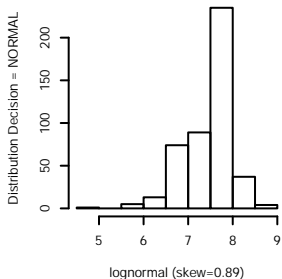



M5\_isothreonic\_acid

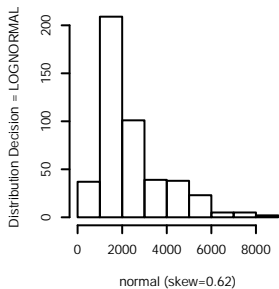

M5\_isothreonic\_acid

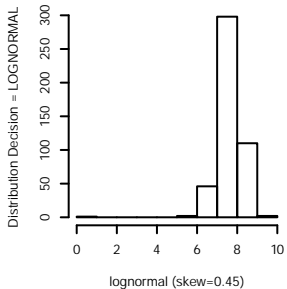

M5\_pyruvic\_acid

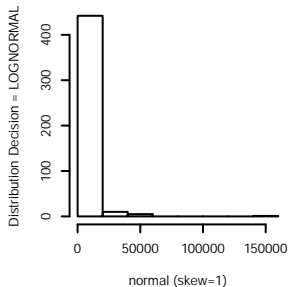

M5\_pyruvic\_acid

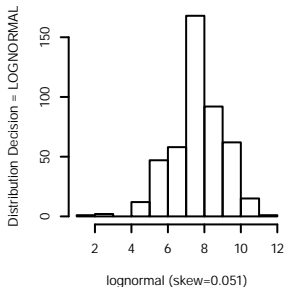

M5\_heptadecanoic\_acid\_nist

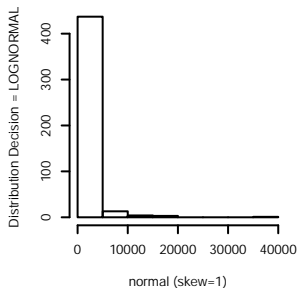

M5\_heptadecanoic\_acid\_nist

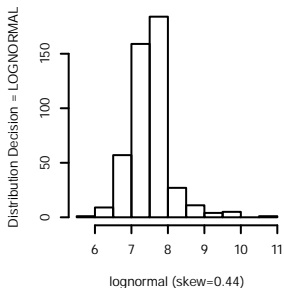

M5\_indole\_3\_acetate

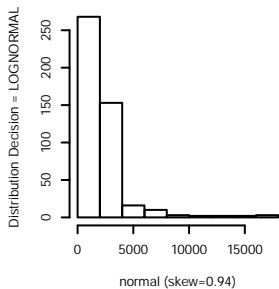

M5\_indole\_3\_acetate

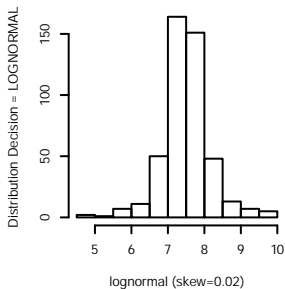

M5\_elaidic\_acid

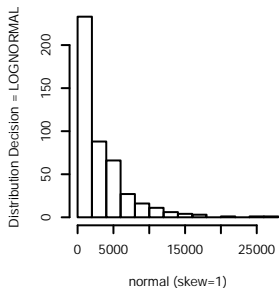

M5\_elaidic\_acid

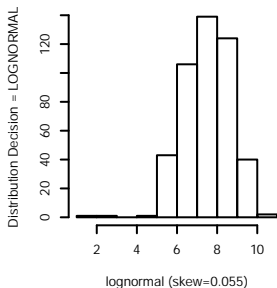

M5\_arachidonic\_acid

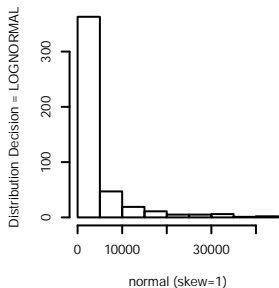

M5\_arachidonic\_acid

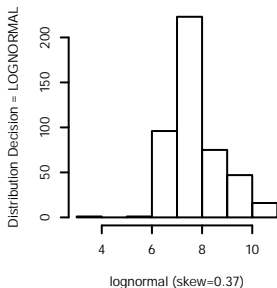

M5\_gamma\_tocopherol

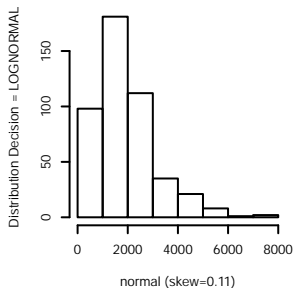

M5\_gamma\_tocopherol

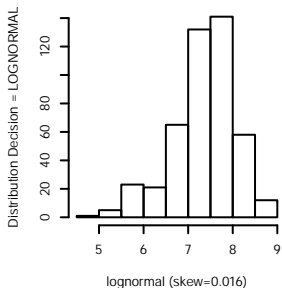

M5\_erythritol

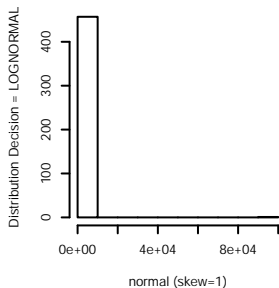

M5\_erythritol

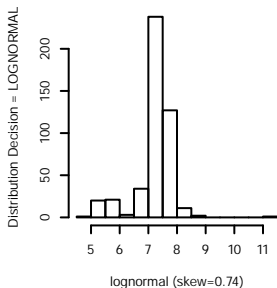

M5\_succinic\_acid

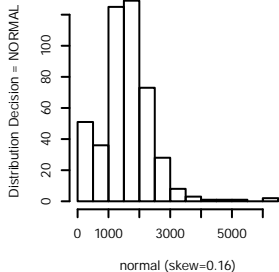

M5\_succinic\_acid

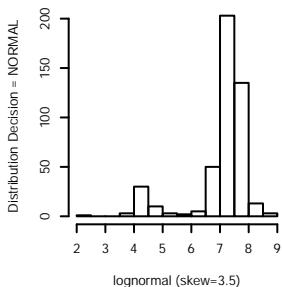

M5\_glycerol\_alpha\_phosphate

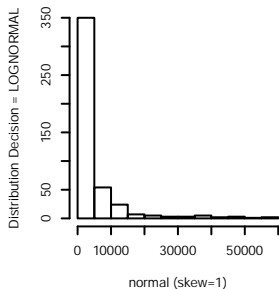

M5\_glycerol\_alpha\_phosphate

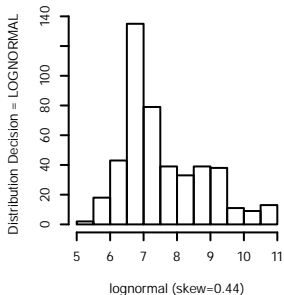

M5\_isocitric\_acid

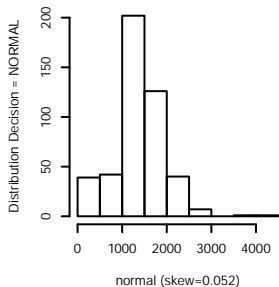

M5\_isocitric\_acid

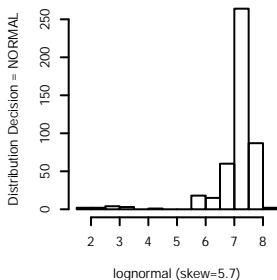

M5\_behenic\_acid

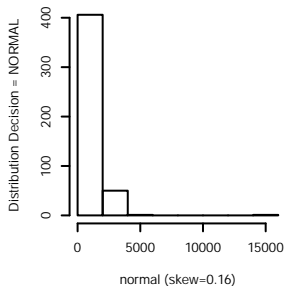

M5\_behenic\_acid

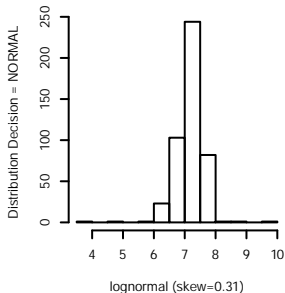

M5\_benzylalcohol

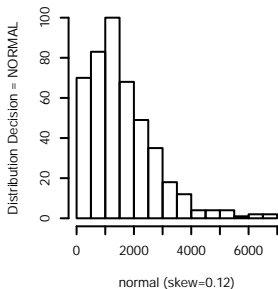

M5\_benzylalcohol

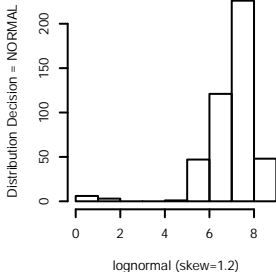

M5\_indole\_3\_lactate

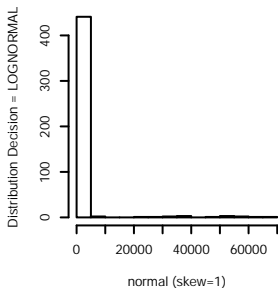

M5\_indole\_3\_lactate

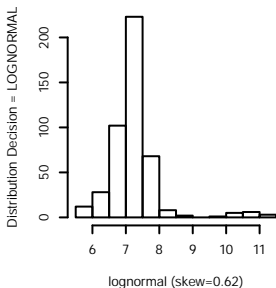

M5\_uracil

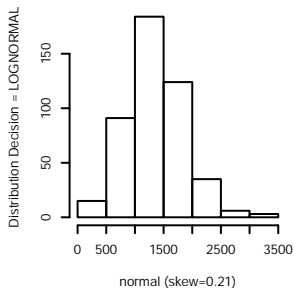

M5\_uracil

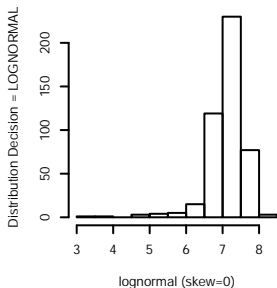

M5\_methanolphosphate

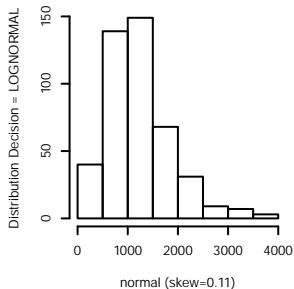

M5\_methanolphosphate

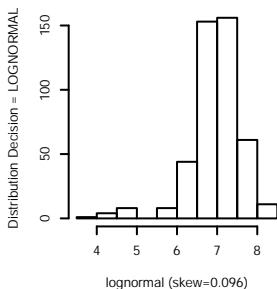



M5\_glyoxalurea\_nist

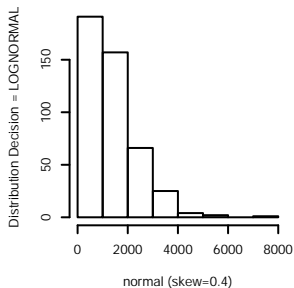

M5\_glyoxalurea\_nist

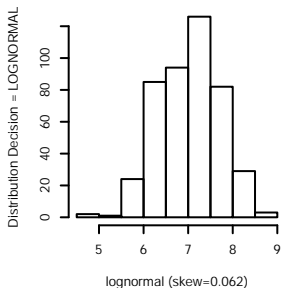

M5\_adipic\_acid

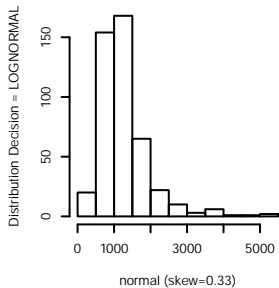

M5\_adipic\_acid

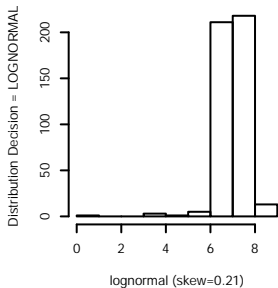

M5\_sorbitol

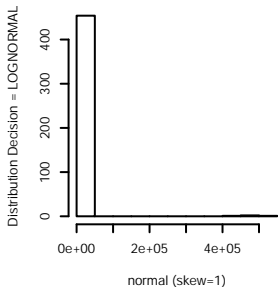

M5\_sorbitol

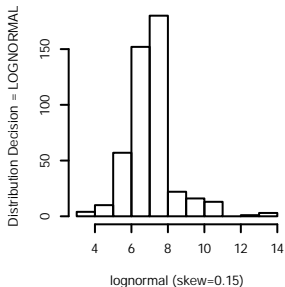

M5\_phosphoethanolamine

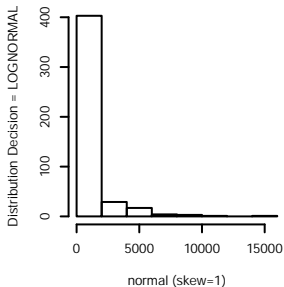

M5\_phosphoethanolamine

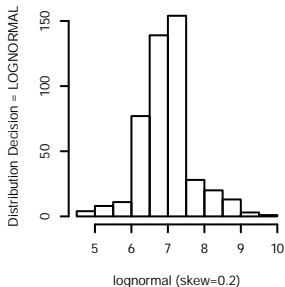

M5\_trans\_4\_hydroxyproline

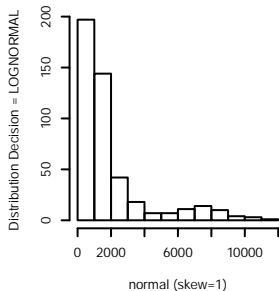

M5\_trans\_4\_hydroxyproline

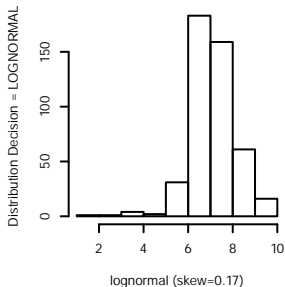

M5\_glucuronic\_acid

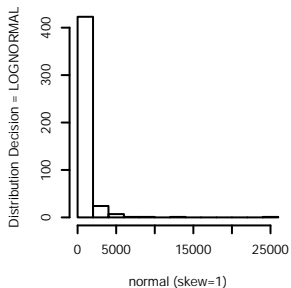

M5\_glucuronic\_acid

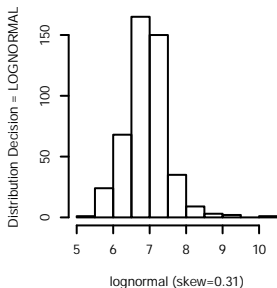

M5\_maleimide

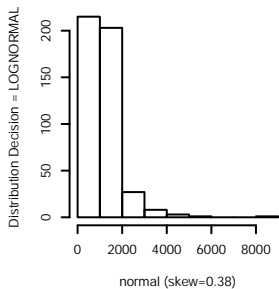

M5\_maleimide

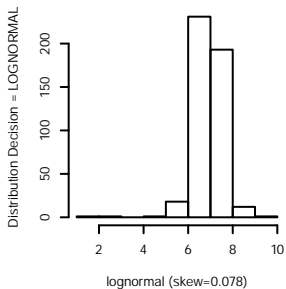

M5\_lignoceric\_acid

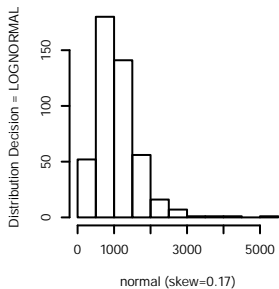

M5\_lignoceric\_acid

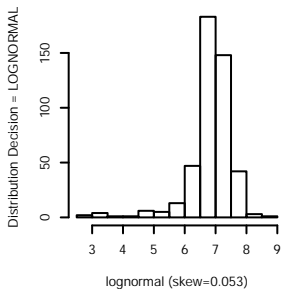

M5\_propane\_1\_3\_diol\_nist

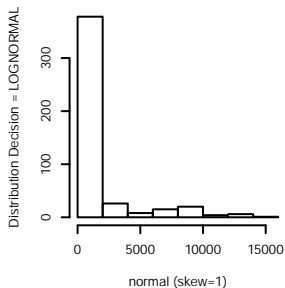

M5\_propane\_1\_3\_diol\_nist

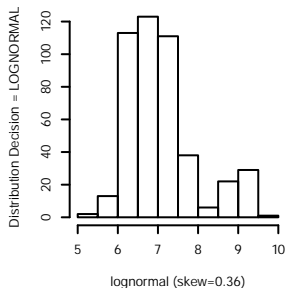

M5\_propane\_1\_2\_3\_tricarboxylate\_nis

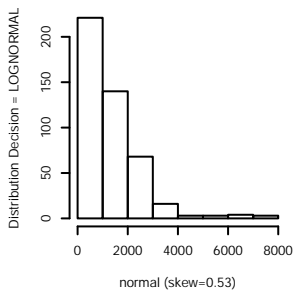

M5\_propane\_1\_2\_3\_tricarboxylate\_nis

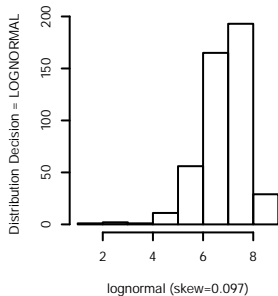

M5\_hydroxyglutaric\_acid

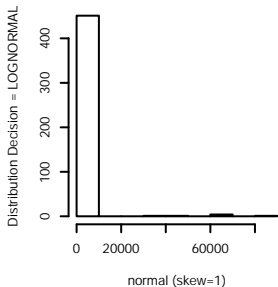

M5\_hydroxyglutaric\_acid

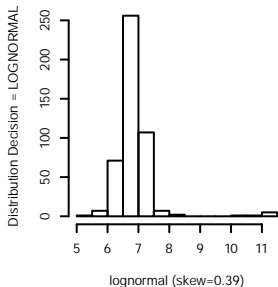

M5\_hypoxanthine

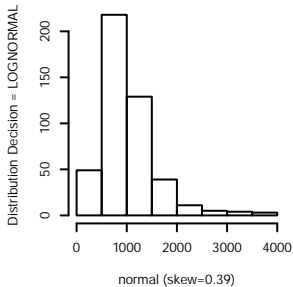

M5\_hypoxanthine

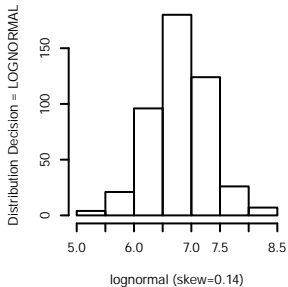

M5\_gluconic\_acid

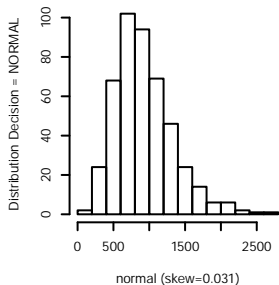

M5\_gluconic\_acid

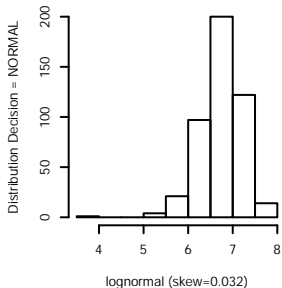

M5\_shikimic\_acid

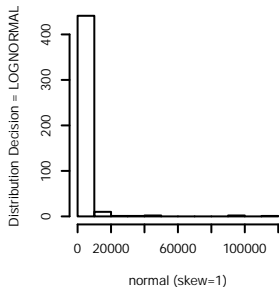

M5\_shikimic\_acid

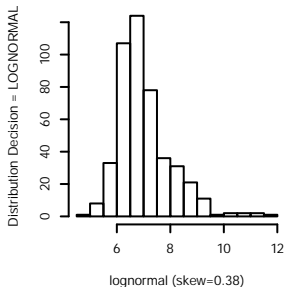

M5\_ribitol

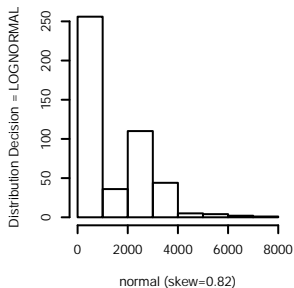

M5\_ribitol

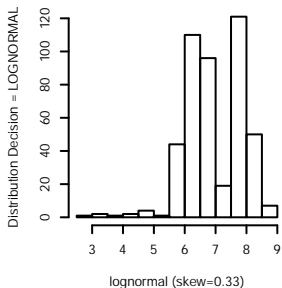

M5\_galactonic\_acid

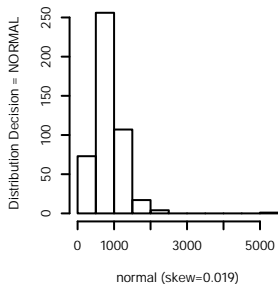

M5\_galactonic\_acid

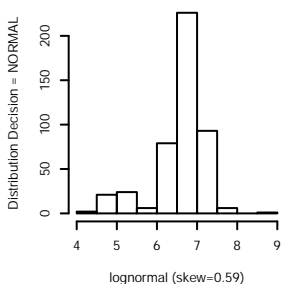



M5\_glucose\_1\_phosphate

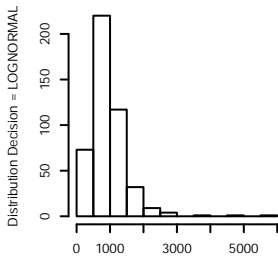

normal (skew=0.44)

M5\_glucose\_1\_phosphate

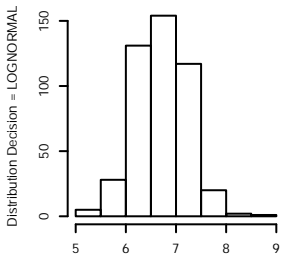

lognormal (skew=0.014)

M5\_arabinose

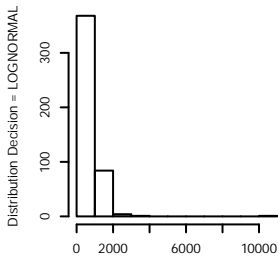

normal (skew=1)

M5\_arabinose

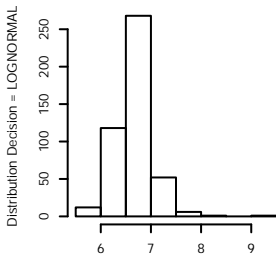

lognormal (skew=0.034)

M5\_malic\_acid

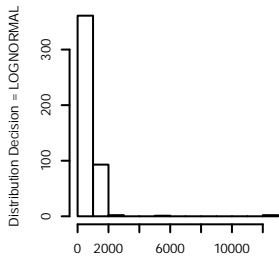

normal (skew=1)

M5\_malic\_acid

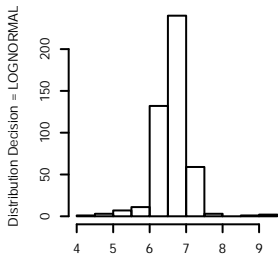

lognormal (skew=0.22)

M5\_maltose

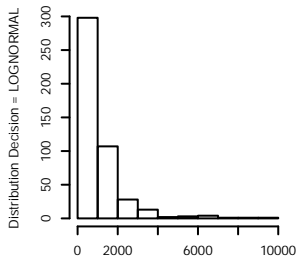

normal (skew=1)

M5\_maltose

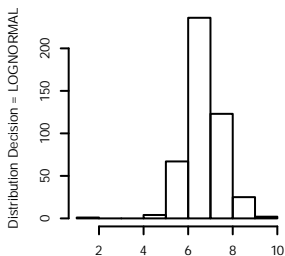

lognormal (skew=0.11)

M5\_alloxanoic\_acid

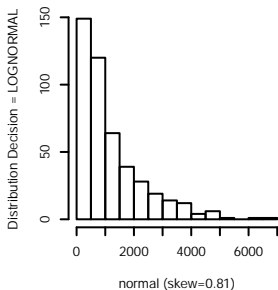

M5\_alloxanoic\_acid

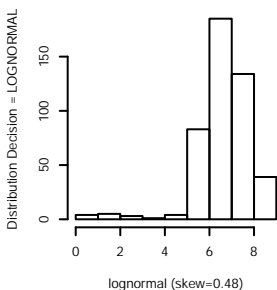

M5\_dihydroabiatic\_acid

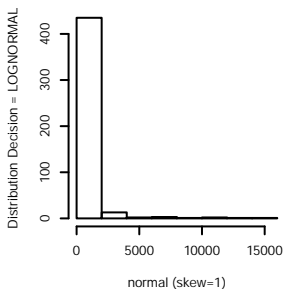

M5\_dihydroabiatic\_acid

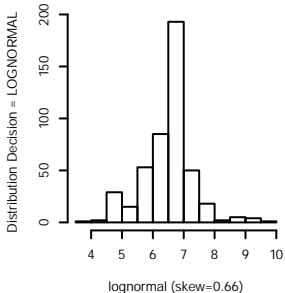

M5\_trehalose

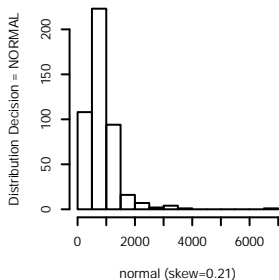

M5\_trehalose

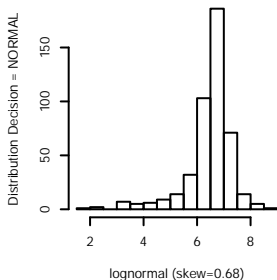

M5\_threitol

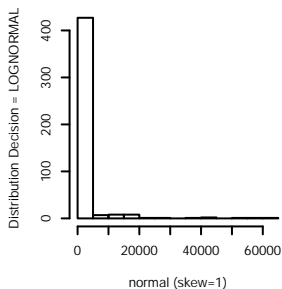

M5\_threitol

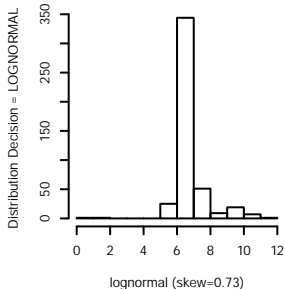

M5\_dodecane

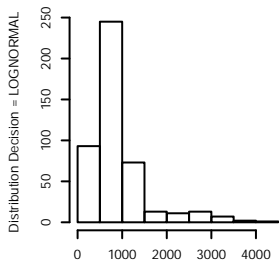

normal (skew=0.56)

M5\_dodecane

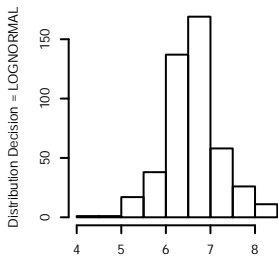

lognormal (skew=0.017)

M5\_levoglucosan

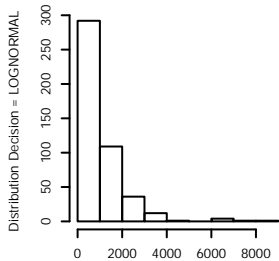

normal (skew=0.94)

M5\_levoglucosan

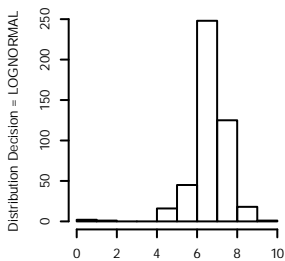

lognormal (skew=0.34)

M5\_4\_diaminobutyric\_acid

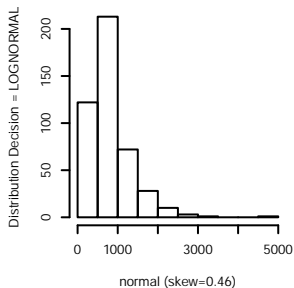

M5\_4\_diaminobutyric\_acid

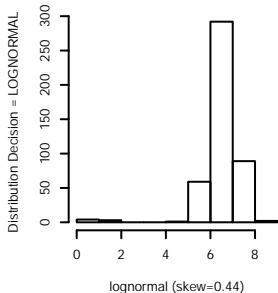

M5\_fumaric\_acid

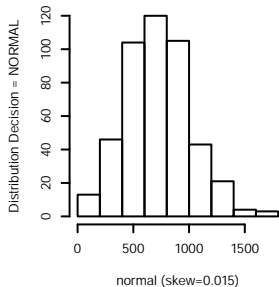

M5\_fumaric\_acid

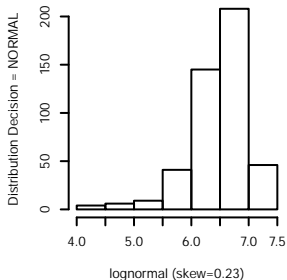

M5\_hydroxycarbamate\_nist

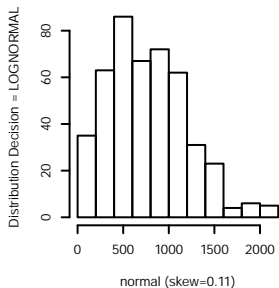

M5\_hydroxycarbamate\_nist

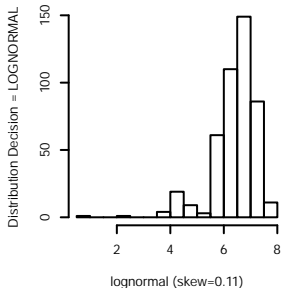

M5\_tartaric\_acid

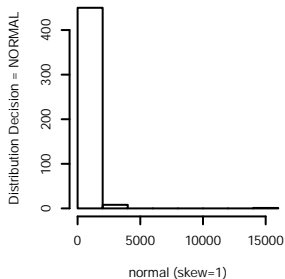

M5\_tartaric\_acid

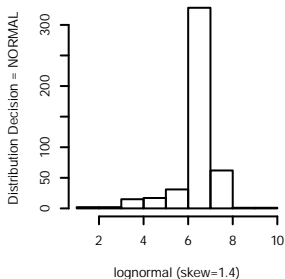

M5\_octadecanol

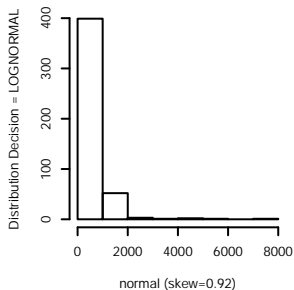

M5\_octadecanol

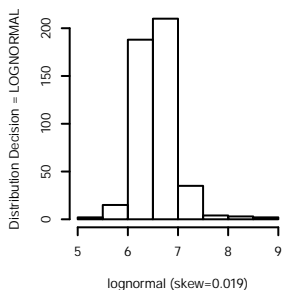

M5\_glycero\_guloheptose\_nist

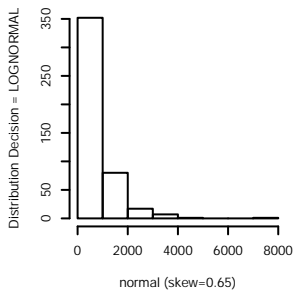

M5\_glycero\_guloheptose\_nist

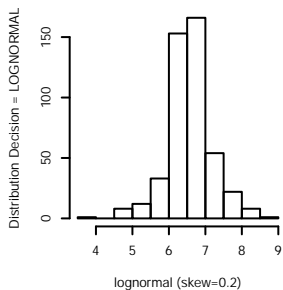



M5\_conduritol\_beta\_epoxide

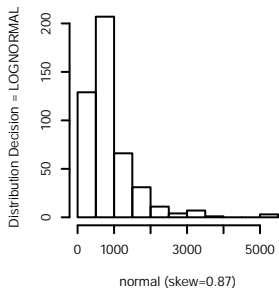

M5\_conduritol\_beta\_epoxide

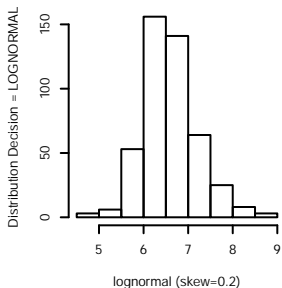

M5\_putrescine

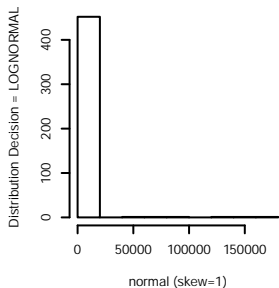

M5\_putrescine

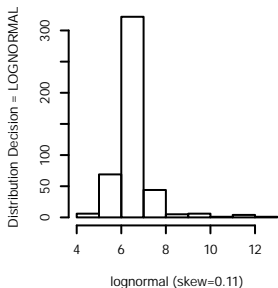

M5\_hexadecanol

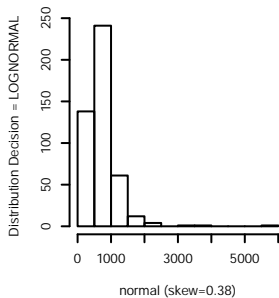

M5\_hexadecanol

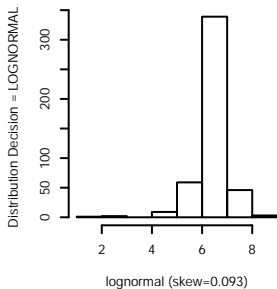

M5\_salicylic\_acid

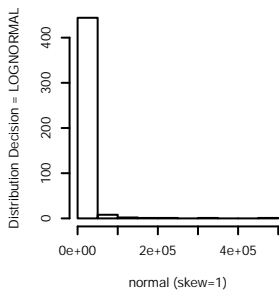

M5\_salicylic\_acid

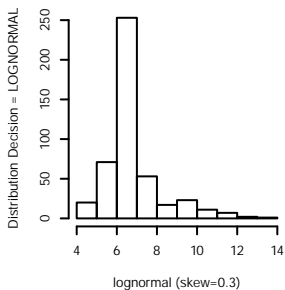

M5\_phytol

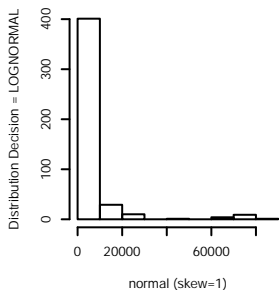

M5\_phytol

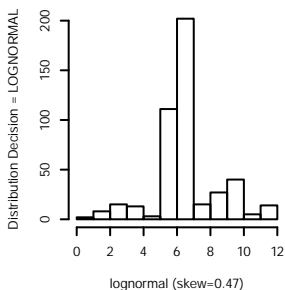

M5\_xylitol

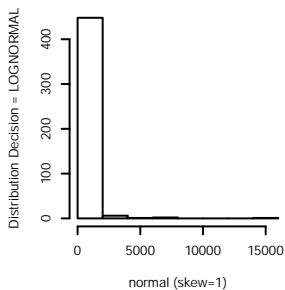

M5\_xylitol

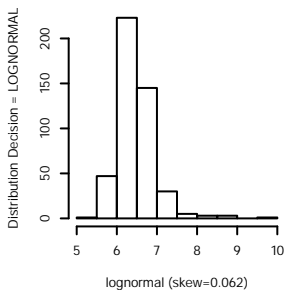

M5\_glycerol\_3\_galactoside

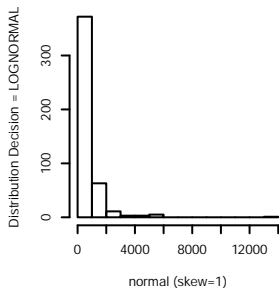

M5\_glycerol\_3\_galactoside

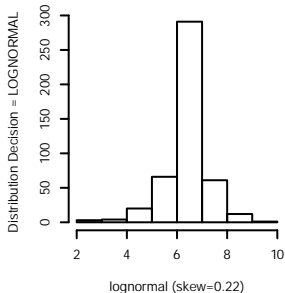

M5\_pyrrole\_2\_carboxylic\_acid

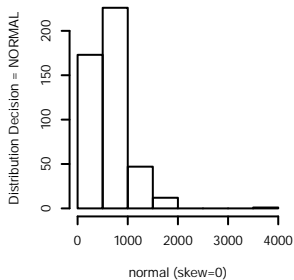

M5\_pyrrole\_2\_carboxylic\_acid

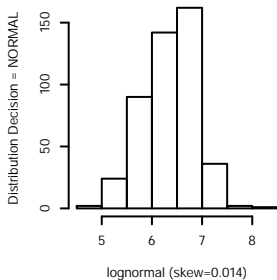

M5\_alpha\_ketoglutaric\_acid

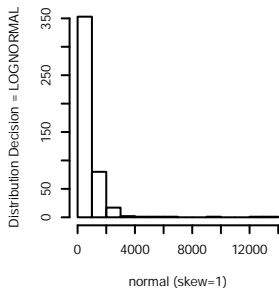

M5\_alpha\_ketoglutaric\_acid

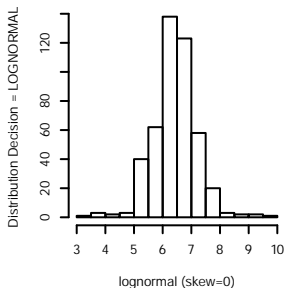

M5\_deoxytetriconic\_acid

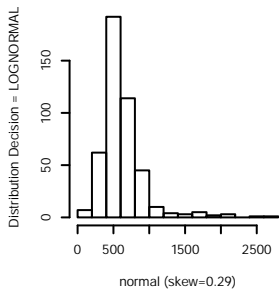

M5\_deoxytetriconic\_acid

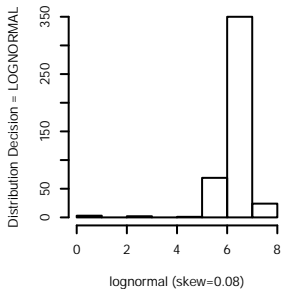

M5\_monostearin

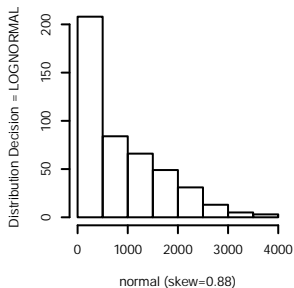

M5\_monostearin

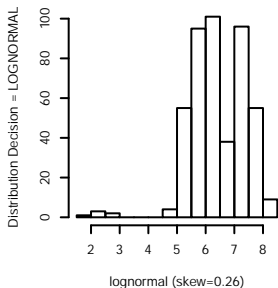

M5\_dodecanol

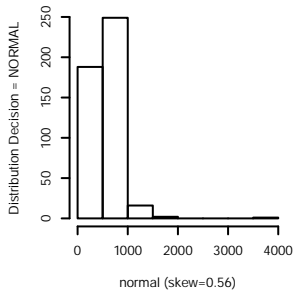

M5\_dodecanol

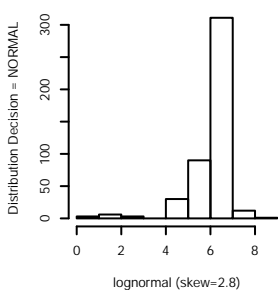

M5\_gaba

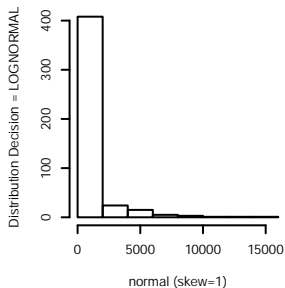

M5\_gaba

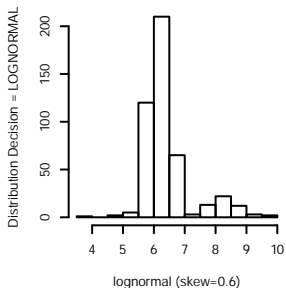

M5\_trihydroxypyrazine\_nist

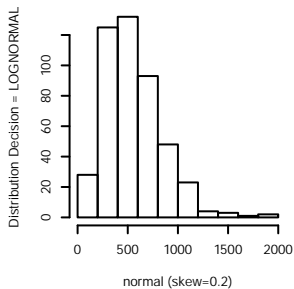

M5\_trihydroxypyrazine\_nist

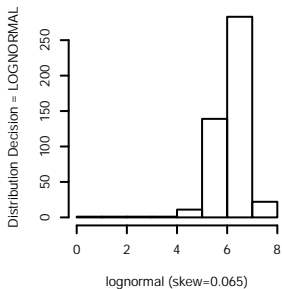

M5\_terephthalic\_acid

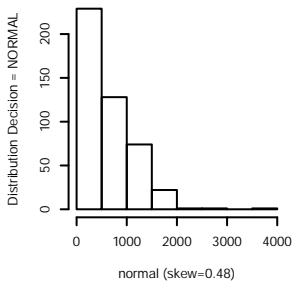

M5\_terephthalic\_acid

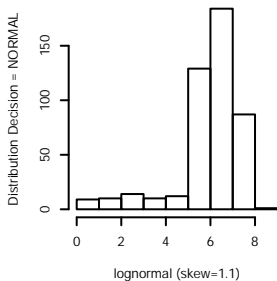

M5\_ribonic\_acid

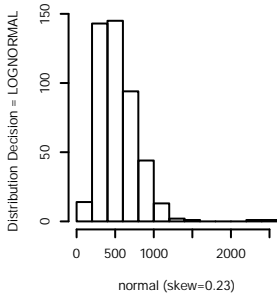

M5\_ribonic\_acid

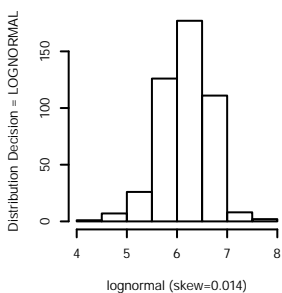



M5\_methoxytryptamine

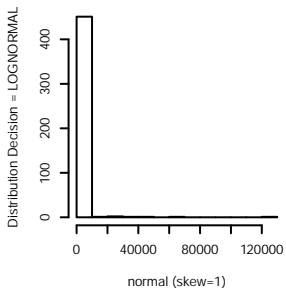

M5\_methoxytryptamine

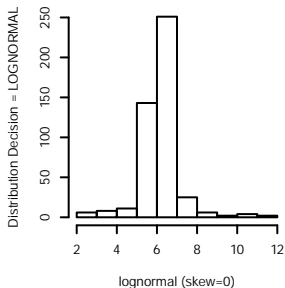

M5\_biuret

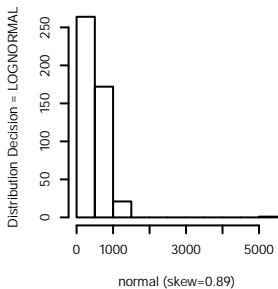

M5\_biuret

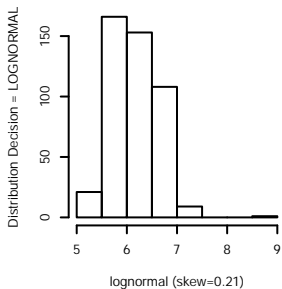

M5\_triethanolamine

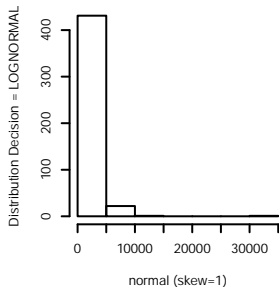

M5\_triethanolamine

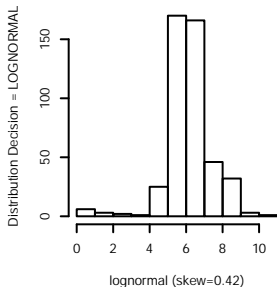

M5\_inulobiose

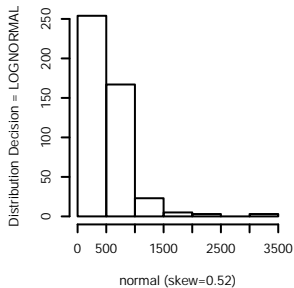

M5\_inulobiose

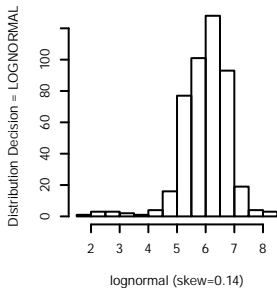

M5\_cellobiotol

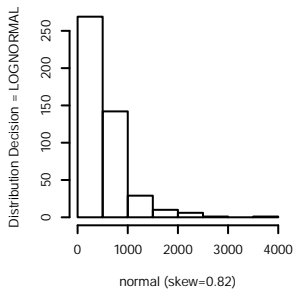

M5\_cellobiotol

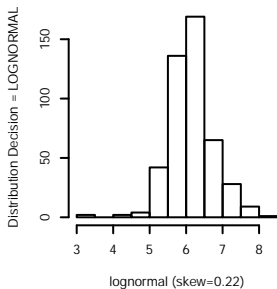

M5\_kynurenine

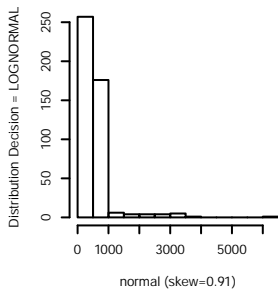

M5\_kynurenine

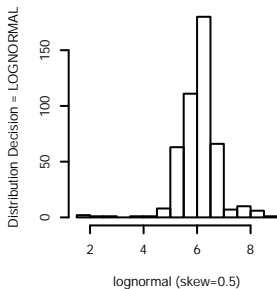

M5\_\_monopalmitin

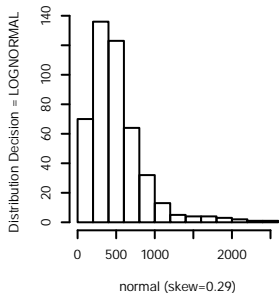

M5\_\_monopalmitin

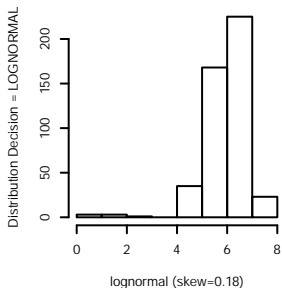

M5\_udp\_glucuronic\_acid

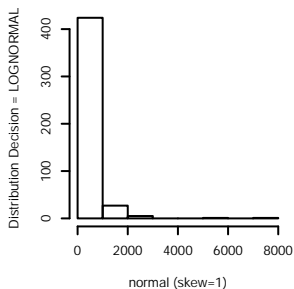

M5\_udp\_glucuronic\_acid

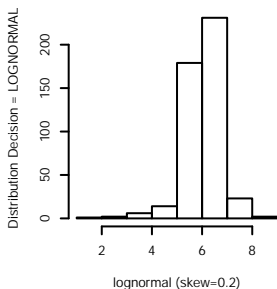

M5\_inositol\_allo\_

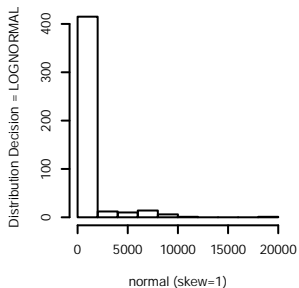

M5\_inositol\_allo\_

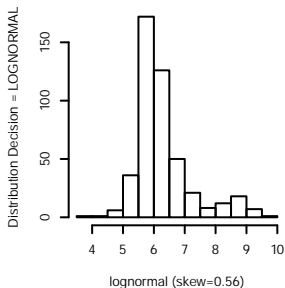

M5\_uridine

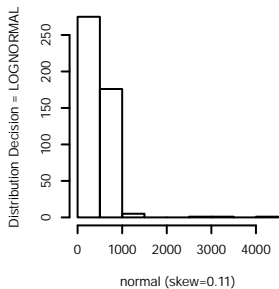

M5\_uridine

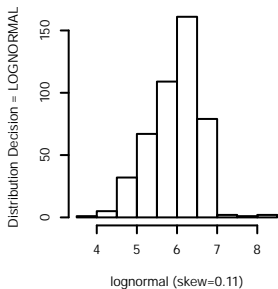

M5\_aminoisobutyric\_acid

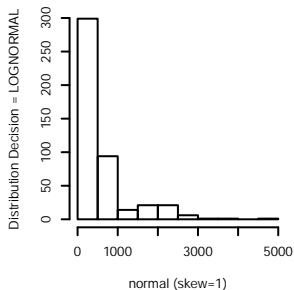

M5\_aminoisobutyric\_acid

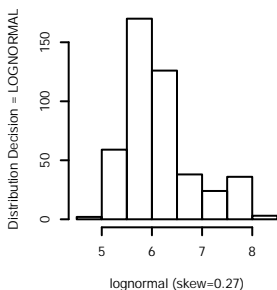

M5\_pyrophosphate

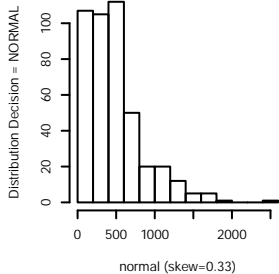

M5\_pyrophosphate

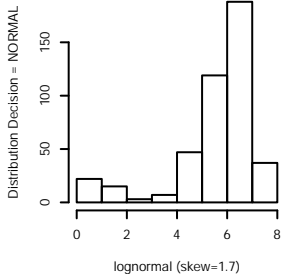

M5\_tocopherol\_beta\_nist

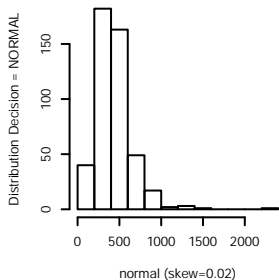

M5\_tocopherol\_beta\_nist

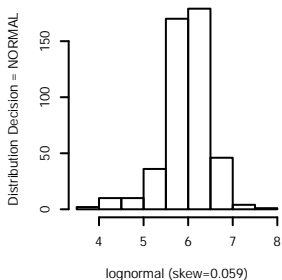

M5\_3\_dihydroxybutanoic\_acid\_nist

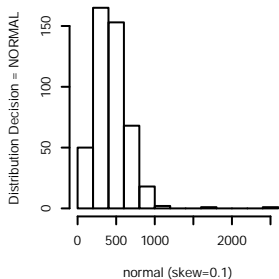

M5\_3\_dihydroxybutanoic\_acid\_nist

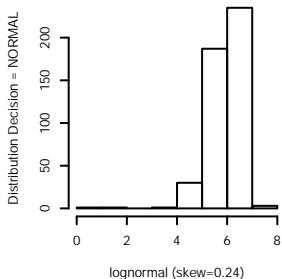

M5\_hydroxynorvaline\_nist

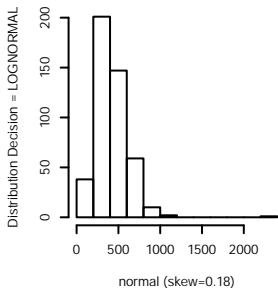

M5\_hydroxynorvaline\_nist

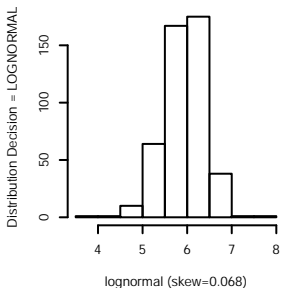

M5\_glycyl\_proline

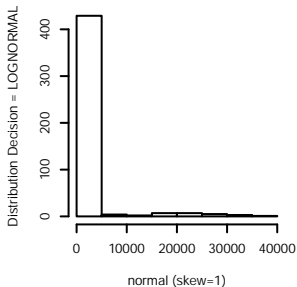

M5\_glycyl\_proline

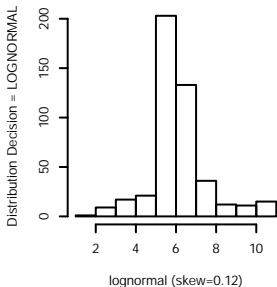



M5\_enolpyruvate\_nist

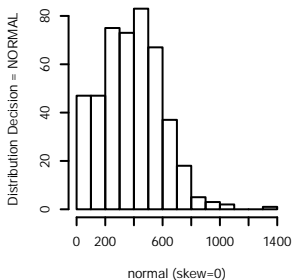

M5\_enolpyruvate\_nist

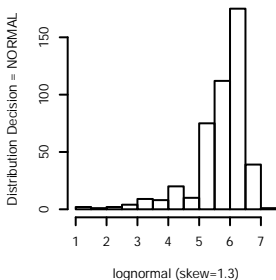

M5\_pyrazine\_2\_5\_dihydroxy\_nist

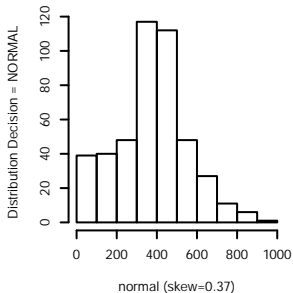

M5\_pyrazine\_2\_5\_dihydroxy\_nist

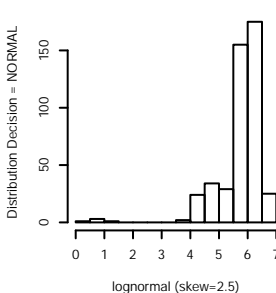

M5\_sucrose

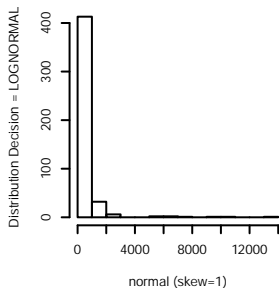

M5\_sucrose

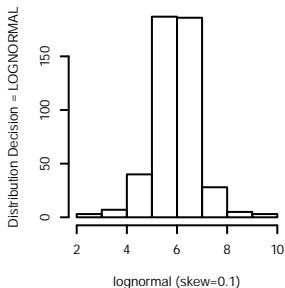

M5\_beta\_glycerolphosphate

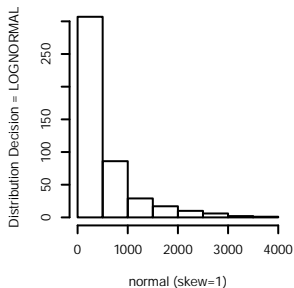

M5\_beta\_glycerolphosphate

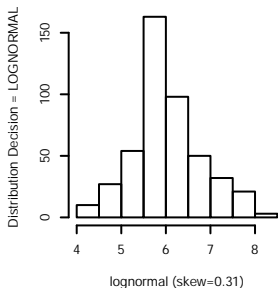

M5\_hydroxybutyric\_acid

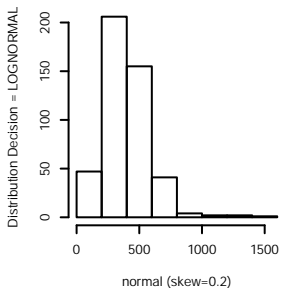

M5\_hydroxybutyric\_acid

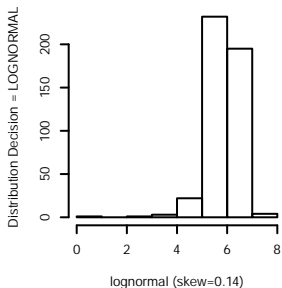

M5\_phosphoglycerate

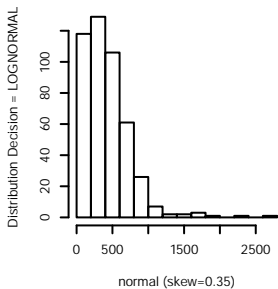

M5\_phosphoglycerate

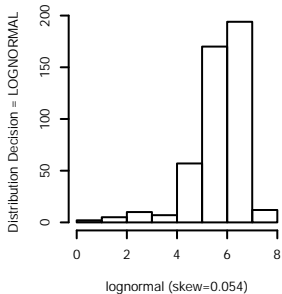

M5\_n\_acetylaspartic\_acid

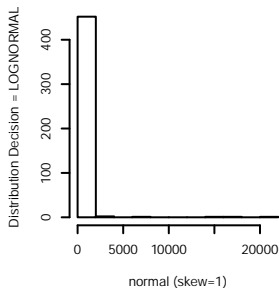

M5\_n\_acetylaspartic\_acid

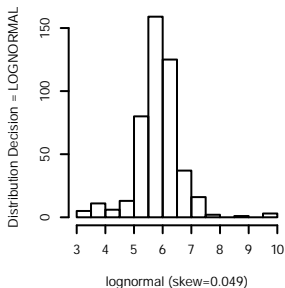

M5\_isobutene\_glycol\_nist

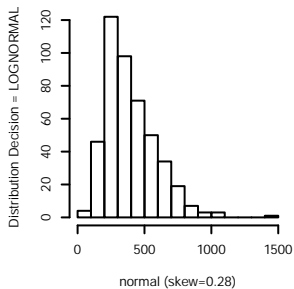

M5\_isobutene\_glycol\_nist

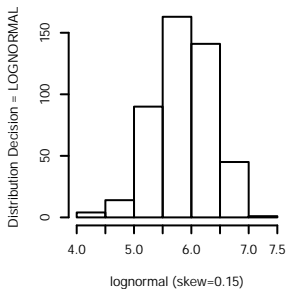

M5\_phenylethylamine

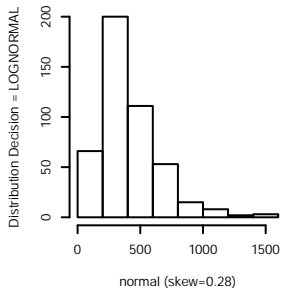

M5\_phenylethylamine

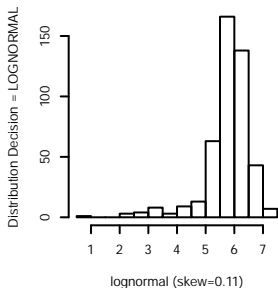

M5\_cysteine\_glycine

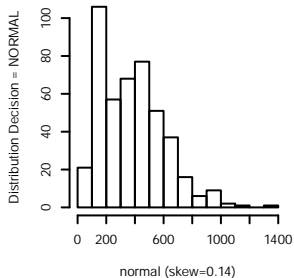

M5\_cysteine\_glycine

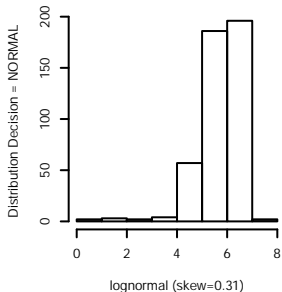

M5\_quinic\_acid

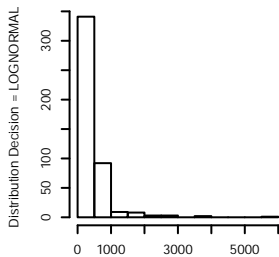

M5\_quinic\_acid

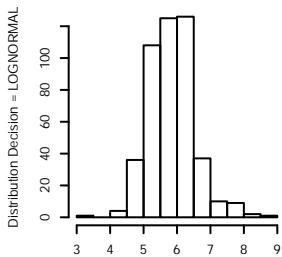

M5\_arabitol

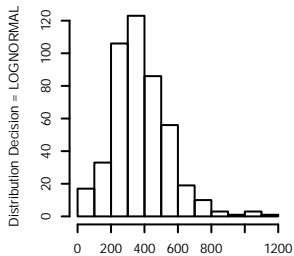

M5\_arabitol

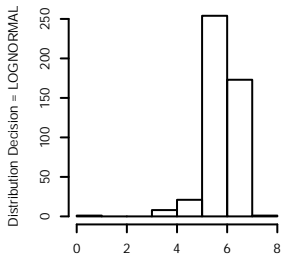

M5\_pipecolic\_acid

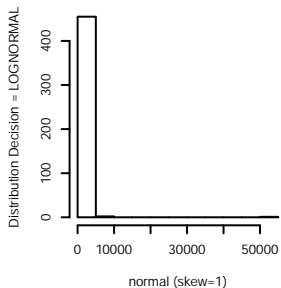

M5\_pipecolic\_acid

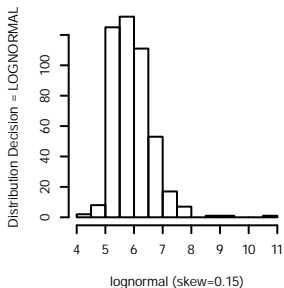

M5\_\_2\_4\_benzenetriol

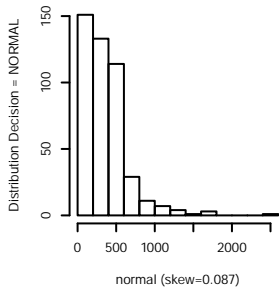

M5\_\_2\_4\_benzenetriol

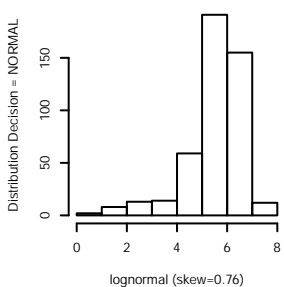

M5\_saccharic\_acid

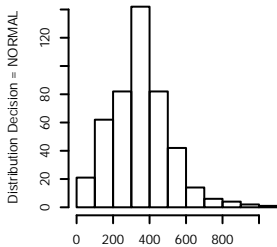

normal (skew=0.32)

M5\_saccharic\_acid

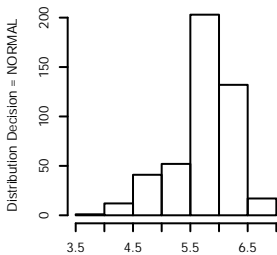

lognormal (skew=0.44)

M5\_idonic\_acid\_nist

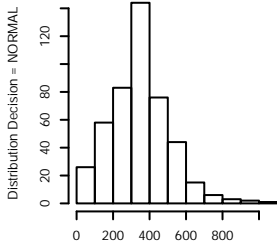

normal (skew=0.22)

M5\_idonic\_acid\_nist

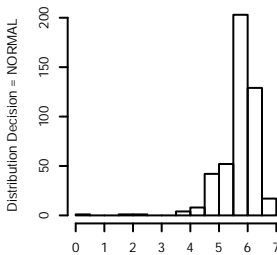

lognormal (skew=0.85)



M5\_methoxytyrosine\_nist

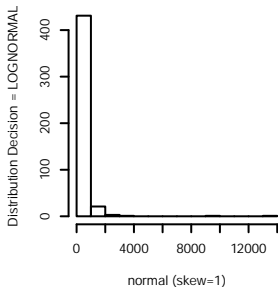

M5\_methoxytyrosine\_nist

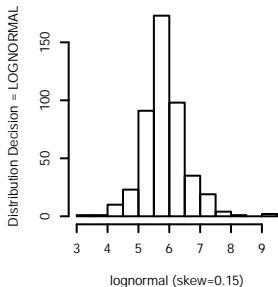

M5\_lactobionic\_acid

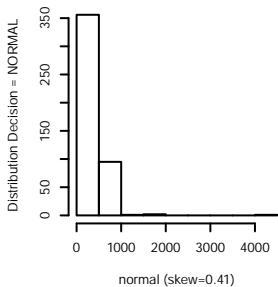

M5\_lactobionic\_acid

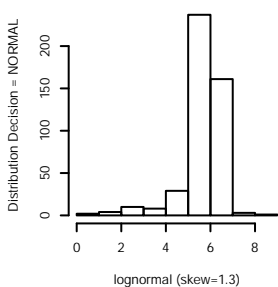

M5\_cellobiose

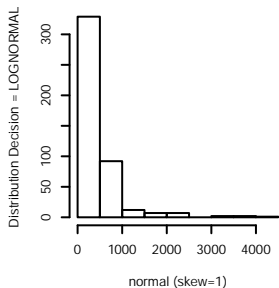

M5\_cellobiose

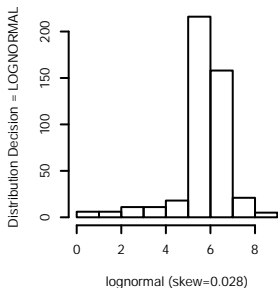

M5\_taurine

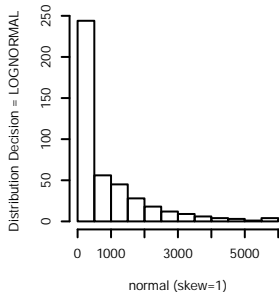

M5\_taurine

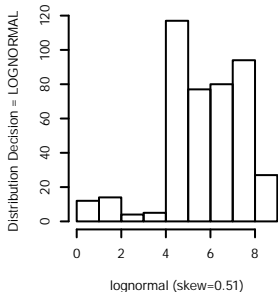

M5\_naproxen

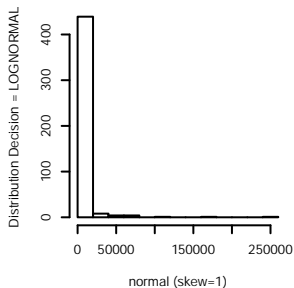

M5\_naproxen

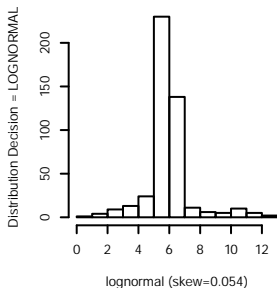

M5\_glutaric\_acid

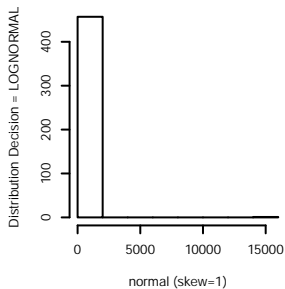

M5\_glutaric\_acid

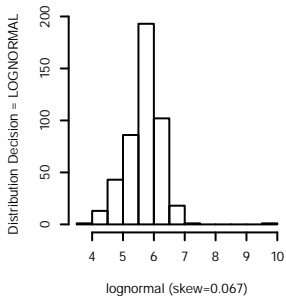

M5\_glycerol\_beta\_phosphate

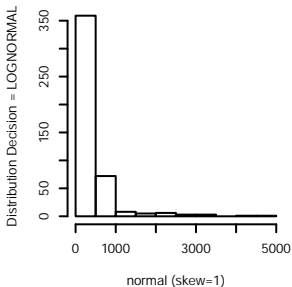

M5\_glycerol\_beta\_phosphate

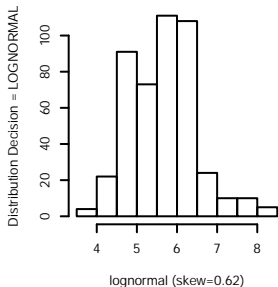

M5\_n\_acetyl\_d\_mannosamine

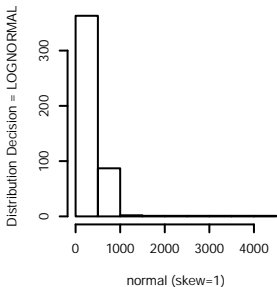

M5\_n\_acetyl\_d\_mannosamine

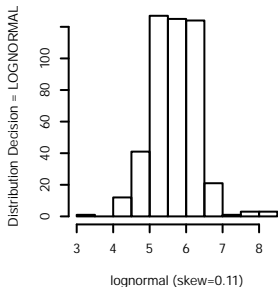

M5\_aconitic\_acid

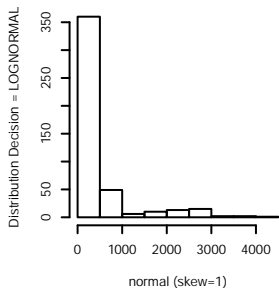

M5\_aconitic\_acid

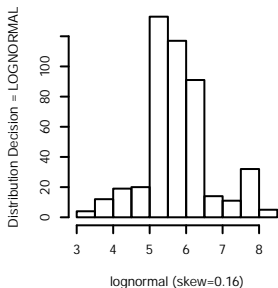

M5\_o\_acetylserine

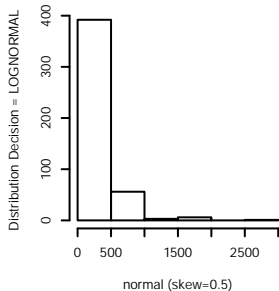

M5\_o\_acetylserine

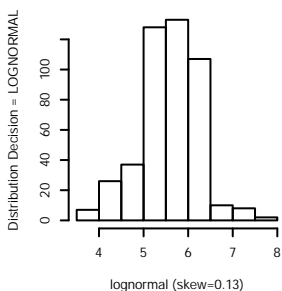

M5\_maltotriose

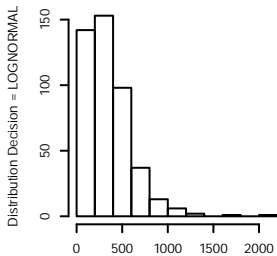

M5\_maltotriose

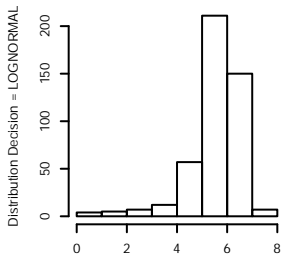

M5\_stigmasterol

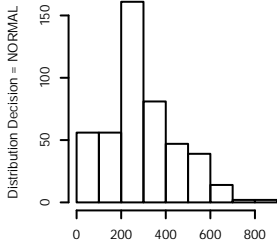

M5\_stigmasterol

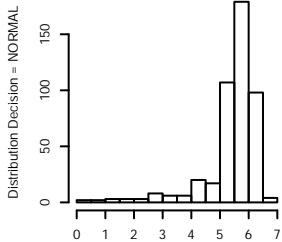

M5\_pyrogallol

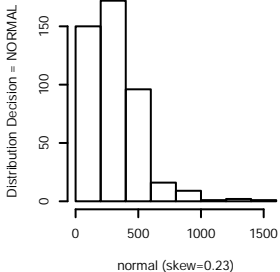

M5\_pyrogallol

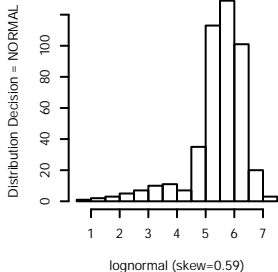

M5\_oxogluconic\_acid\_nist

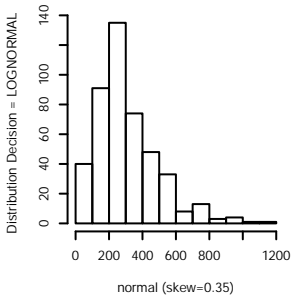

M5\_oxogluconic\_acid\_nist

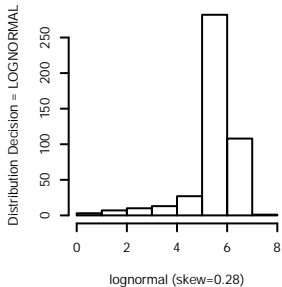

M5\_3\_5\_trihydroxypyrazine\_nist

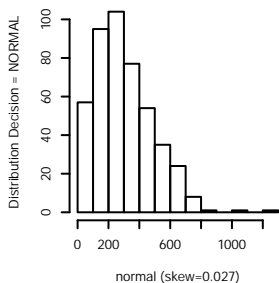

M5\_3\_5\_trihydroxypyrazine\_nist

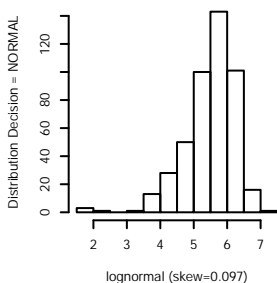

M5\_aminoadipic\_acid

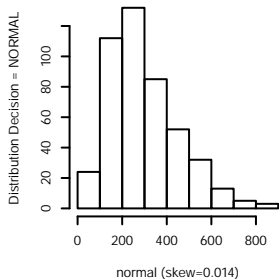

M5\_aminoadipic\_acid

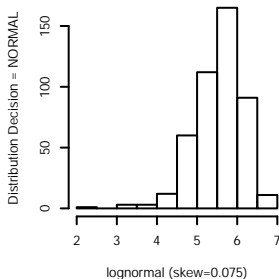



M5\_monopalmitin\_1

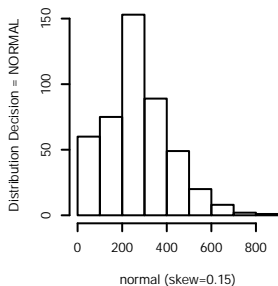

M5\_monopalmitin\_1

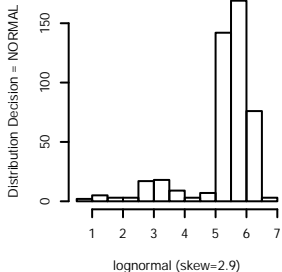

M5\_epsilon\_caprolactam

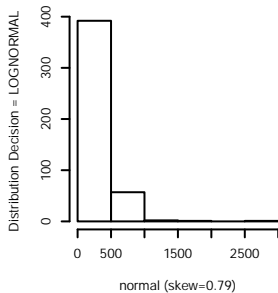

M5\_epsilon\_caprolactam

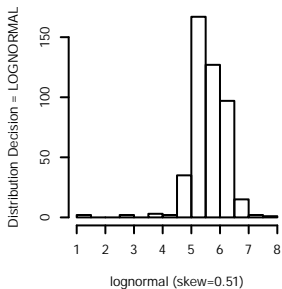

M5\_citramalic\_acid

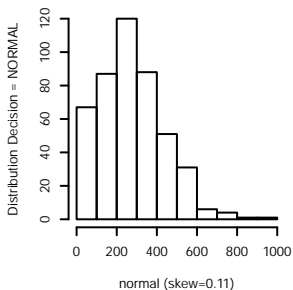

M5\_citramalic\_acid

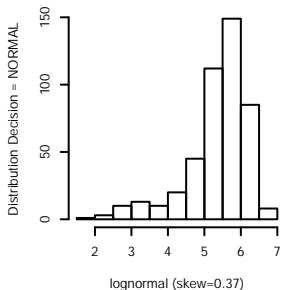

M5\_beta\_alanine

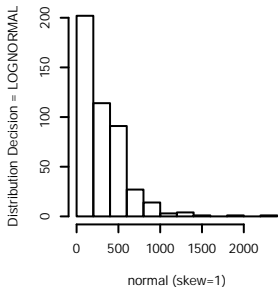

M5\_beta\_alanine

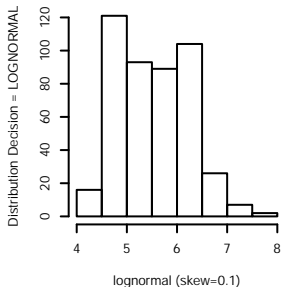

M5\_azelaic\_acid

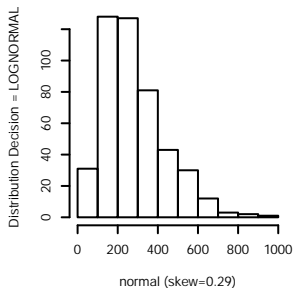

M5\_azelaic\_acid

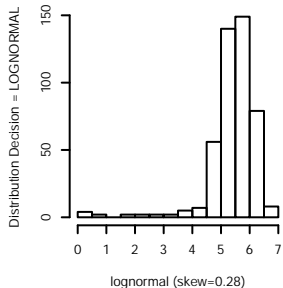

M5\_n\_acetyl\_d\_tryptophan

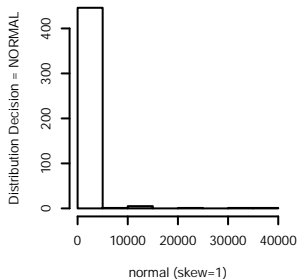

M5\_n\_acetyl\_d\_tryptophan

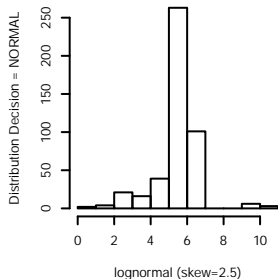

M5\_6\_anhydrogalactose

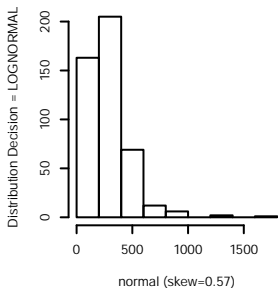

M5\_6\_anhydrogalactose

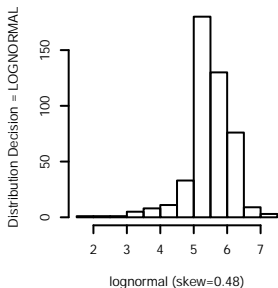

M5\_paracetamol

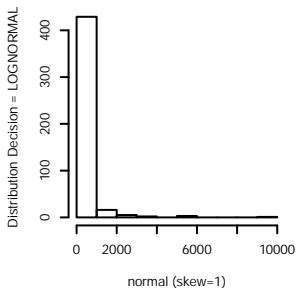

M5\_paracetamol

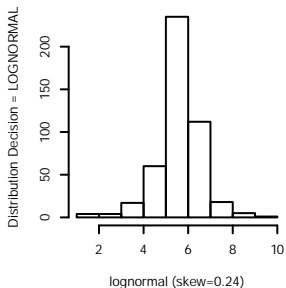

M5\_adenosine\_5\_phosphate

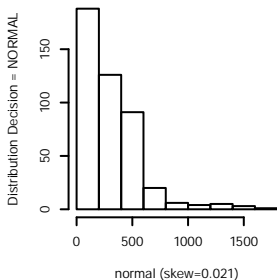

M5\_adenosine\_5\_phosphate

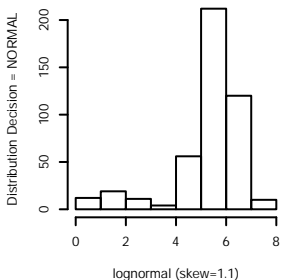

M5\_lathosterol\_nist

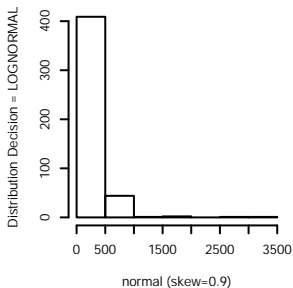

M5\_lathosterol\_nist

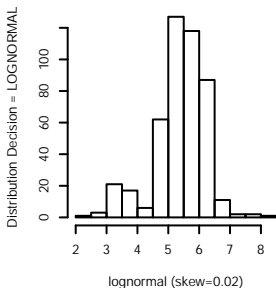

M5\_glucoheptulose

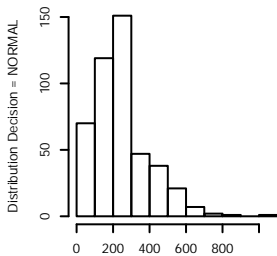

M5\_glucoheptulose

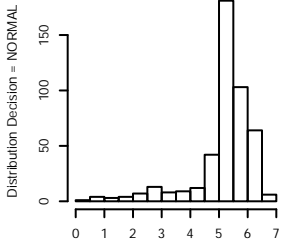

M5\_mevalonic\_acid\_nist

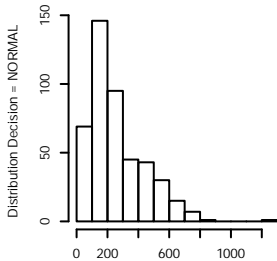

M5\_mevalonic\_acid\_nist

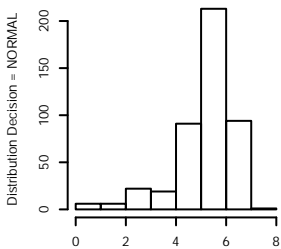

M5\_ribose

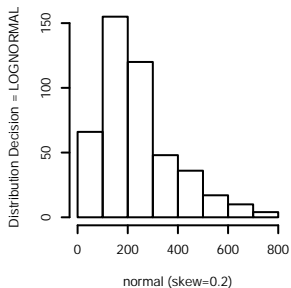

M5\_ribose

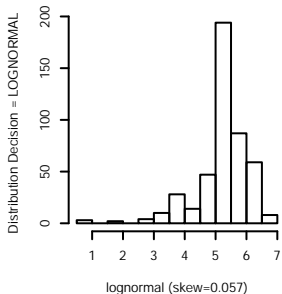

M5\_chlorogenic\_acid

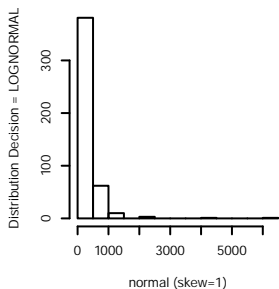

M5\_chlorogenic\_acid

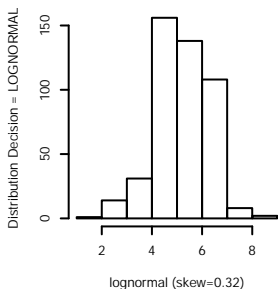

M5\_allantoic\_acid

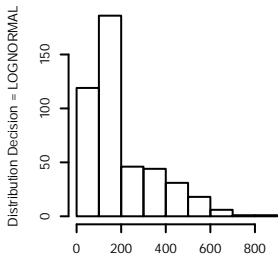

normal (skew=0.52)

M5\_allantoic\_acid

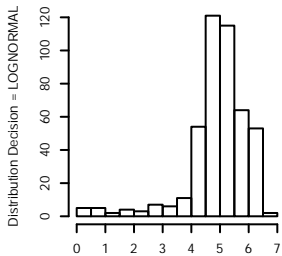

lognormal (skew=0.27)

M5\_sophorose

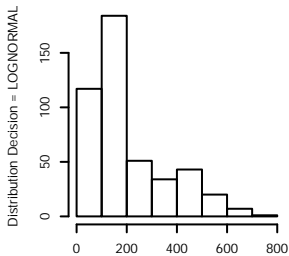

normal (skew=0.39)

M5\_sophorose

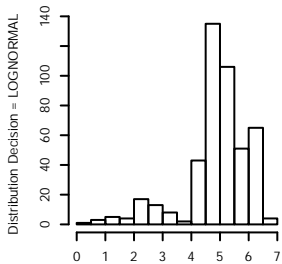

lognormal (skew=0.24)



M5\_galactose\_6\_phosphate

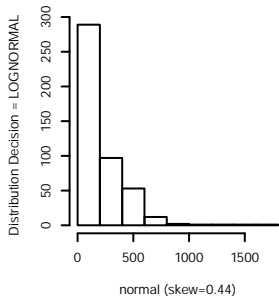

M5\_galactose\_6\_phosphate

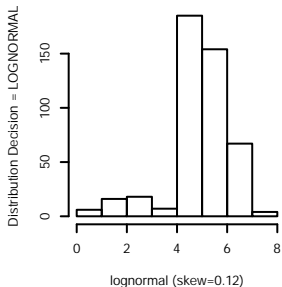

M5\_formononetin

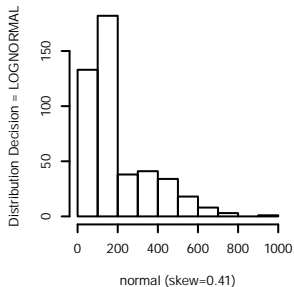

M5\_formononetin

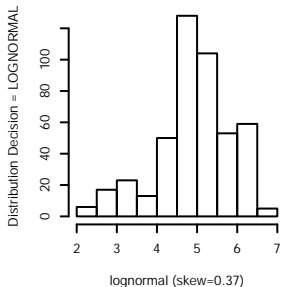

M5\_adenosine

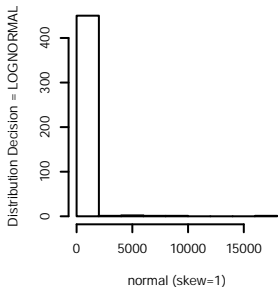

M5\_adenosine

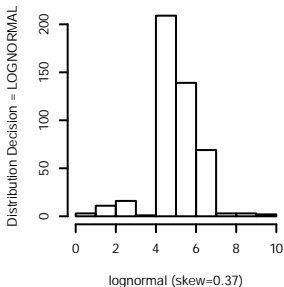

M5\_hydroxyhippuric\_acid

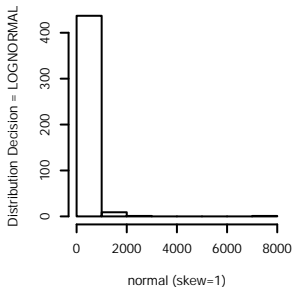

M5\_hydroxyhippuric\_acid

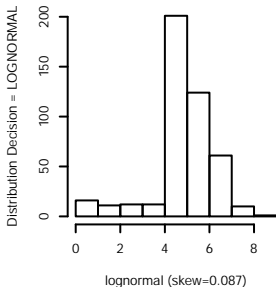

M5\_02571

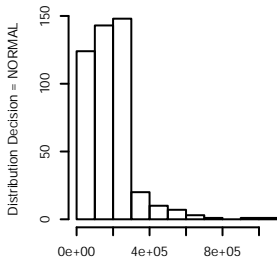

M5\_02571

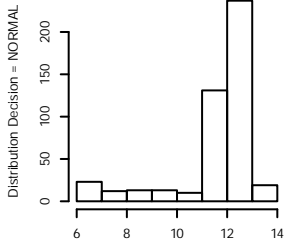

M5\_73067

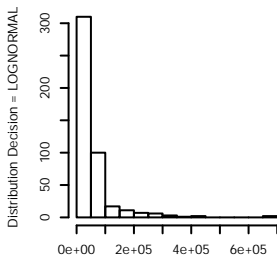

M5\_73067

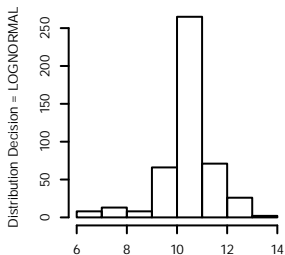

M5\_26842

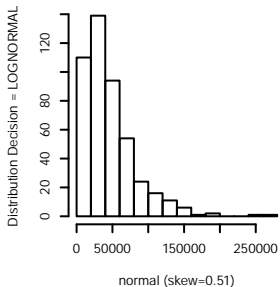

M5\_26842

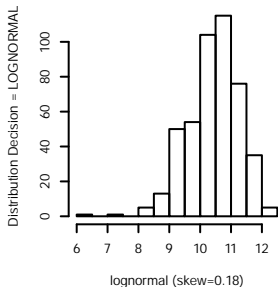

M5\_60956

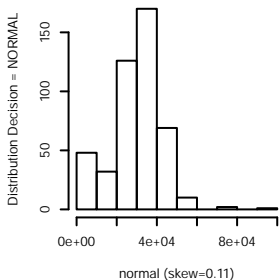

M5\_60956

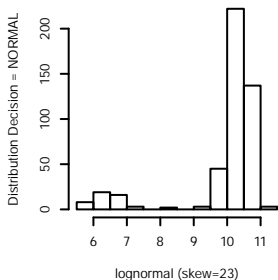

M5\_99777

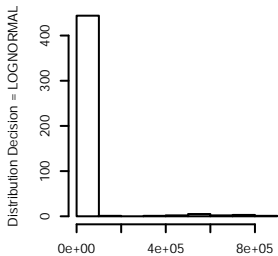

normal (skew=1)

M5\_99777

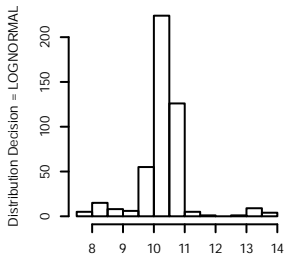

lognormal (skew=0.75)

M5\_66628

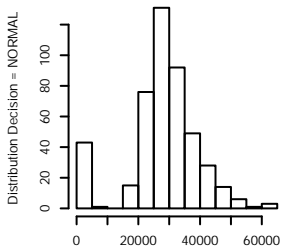

normal (skew=0.16)

M5\_66628

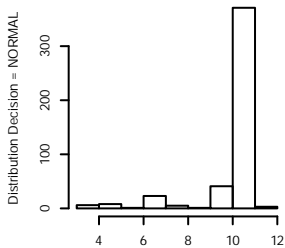

lognormal (skew=Inf)

M5\_46067

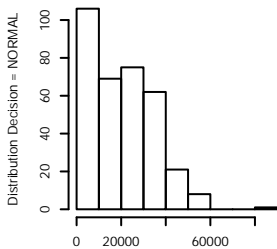

normal (skew=0.67)

M5\_46067

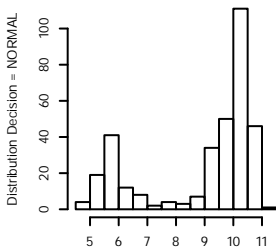

lognormal (skew=16)

M5\_11972

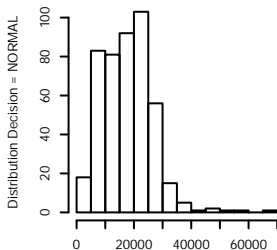

normal (skew=0.3)

M5\_11972

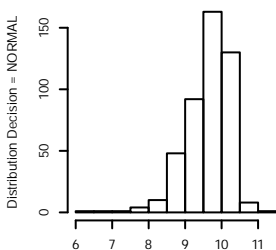

lognormal (skew=0.83)

M5\_23186

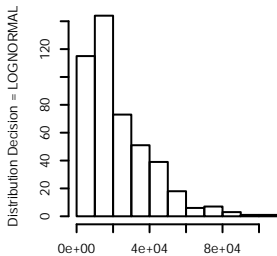

normal (skew=0.44)

M5\_23186

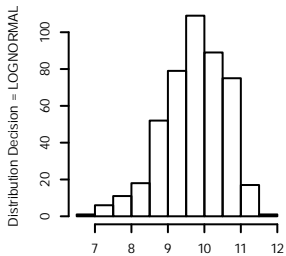

lognormal (skew=0.049)

M5\_13253

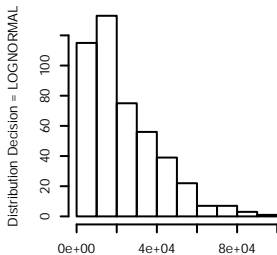

normal (skew=0.23)

M5\_13253

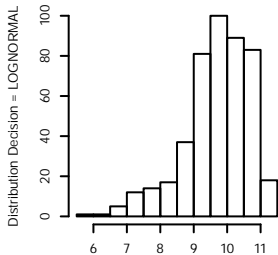

lognormal (skew=0.062)

M5\_83390

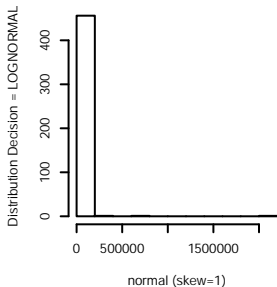

M5\_83390

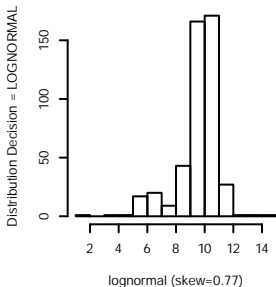

M5\_38109

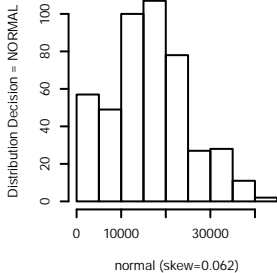

M5\_38109

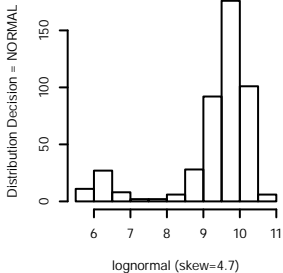



M5\_99773

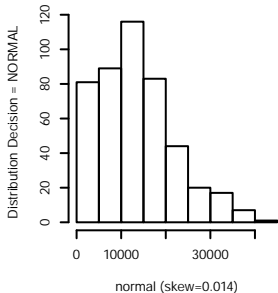

M5\_99773

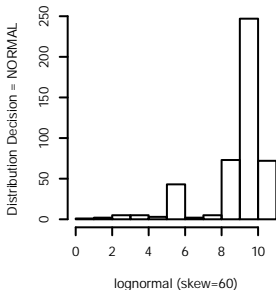

M5\_70066

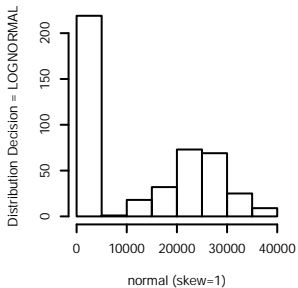

M5\_70066

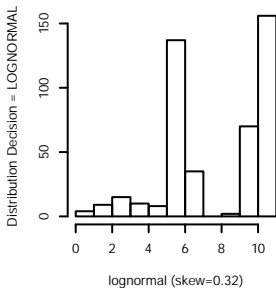

M5\_38061

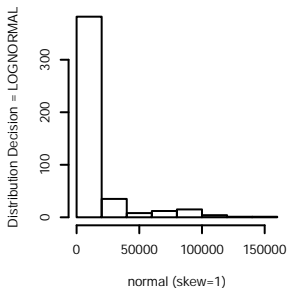

M5\_38061

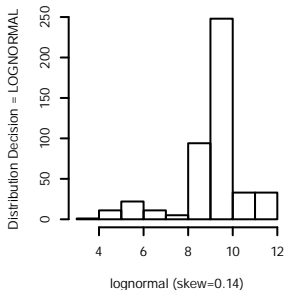

M5\_16629

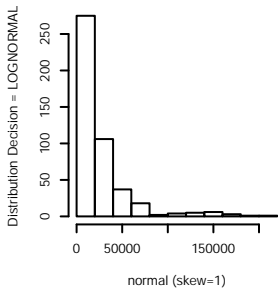

M5\_16629

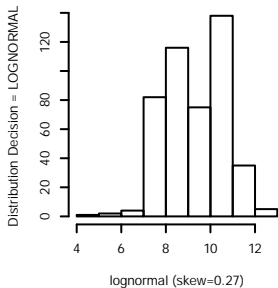

M5\_46628

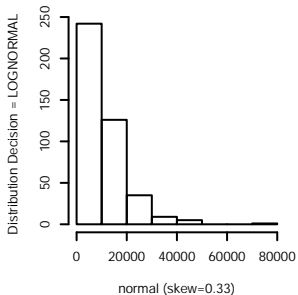

M5\_46628

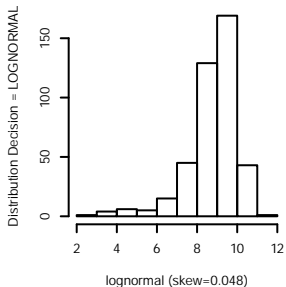

M5\_26841

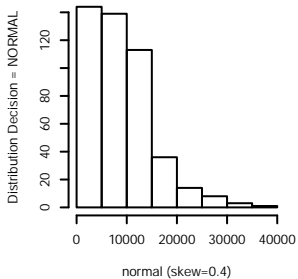

M5\_26841

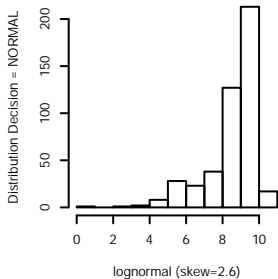

M5\_66268

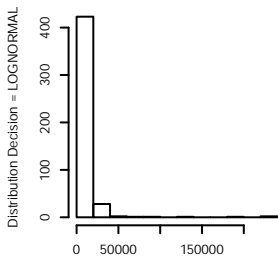

normal (skew=1)

M5\_66268

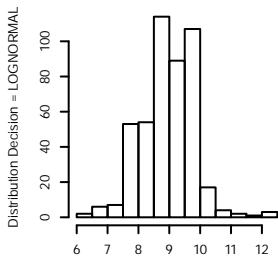

lognormal (skew=0.62)

M5\_14770

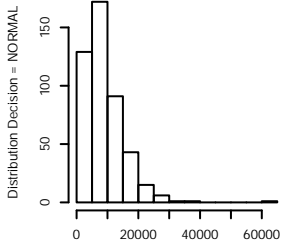

normal (skew=0.44)

M5\_14770

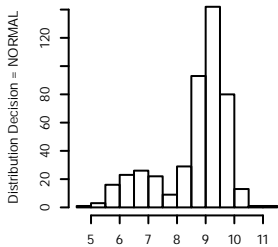

lognormal (skew=1.4)

M5\_13972

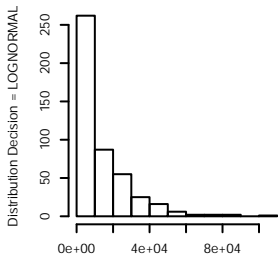

M5\_13972

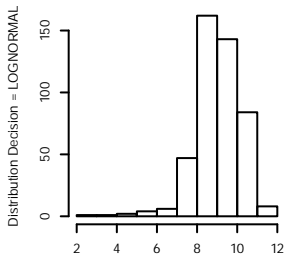

M5\_85340

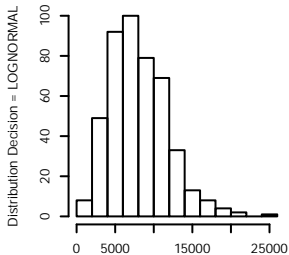

M5\_85340

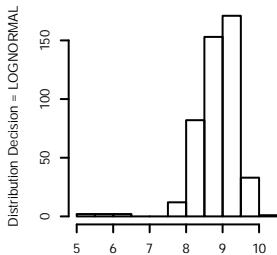

M5\_26843

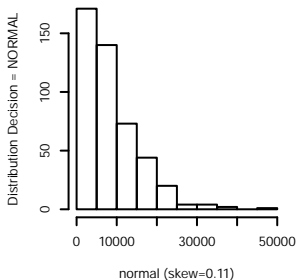

M5\_26843

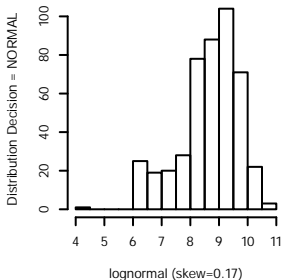

M5\_19168

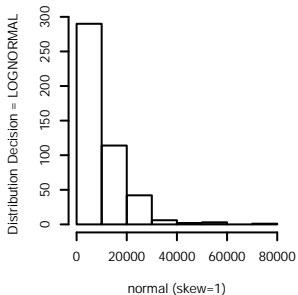

M5\_19168

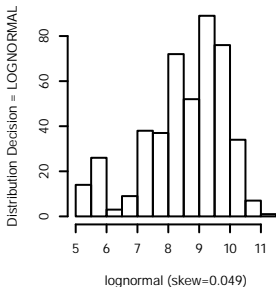

M5\_23675

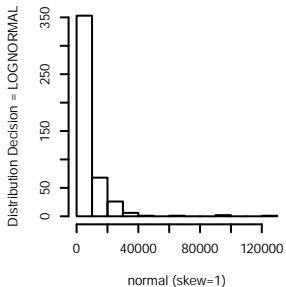

M5\_23675

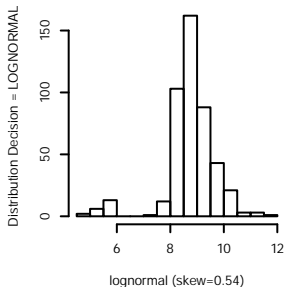

M5\_99786

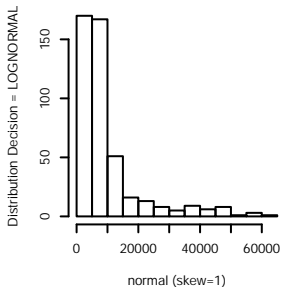

M5\_99786

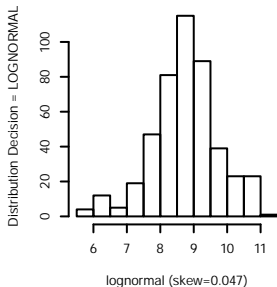

M5\_99794

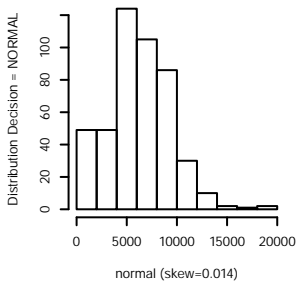

M5\_99794

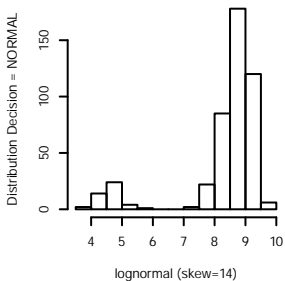

M5\_26848

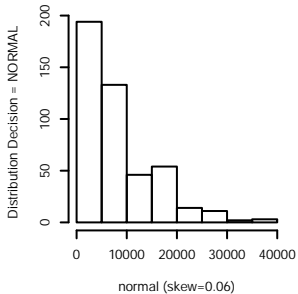

M5\_26848

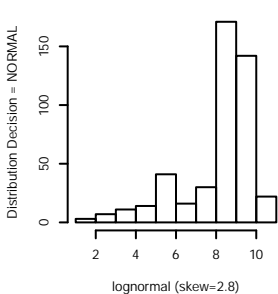



M5\_04426

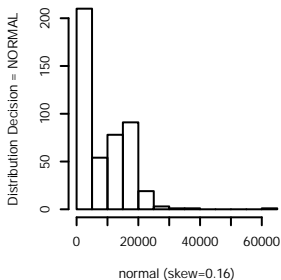

M5\_04426

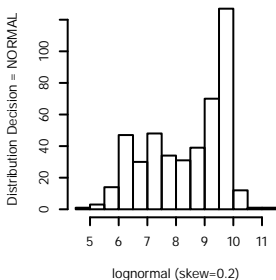

M5\_71050

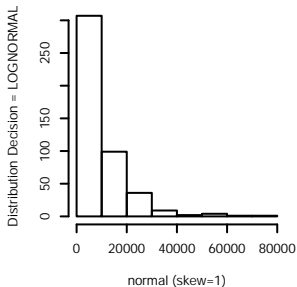

M5\_71050

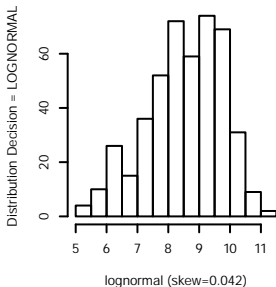

M5\_65393

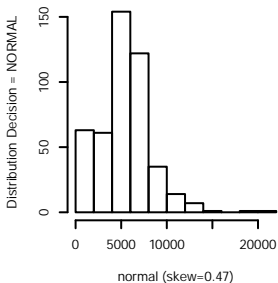

M5\_65393

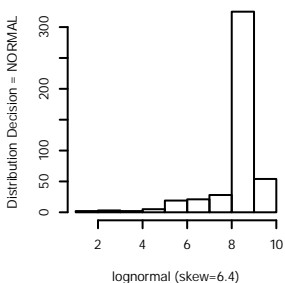

M5\_16043

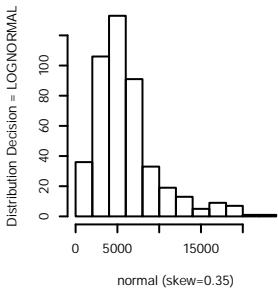

M5\_16043

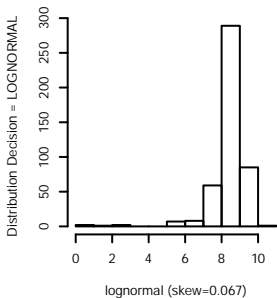

M5\_99239

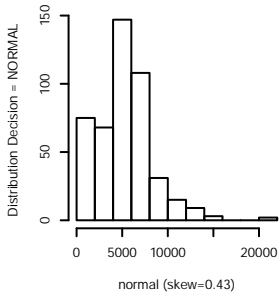

M5\_99239

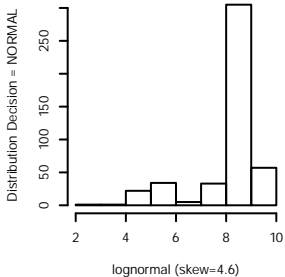

M5\_65981

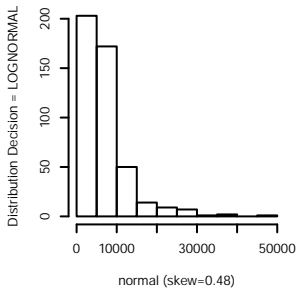

M5\_65981

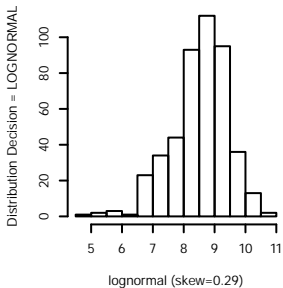

M5\_72853

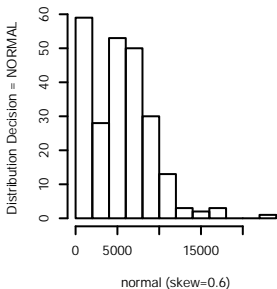

M5\_72853

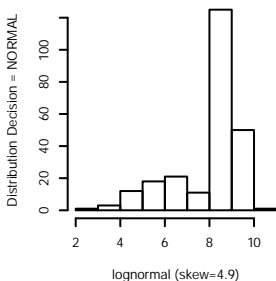

M5\_06309

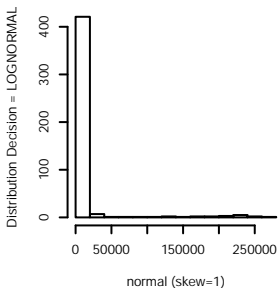

M5\_06309

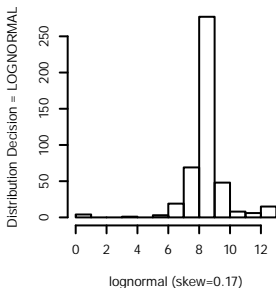

M5\_99596

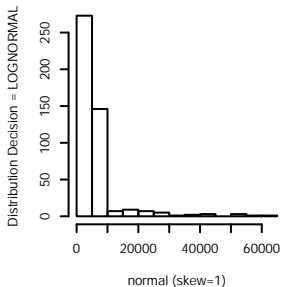

M5\_99596

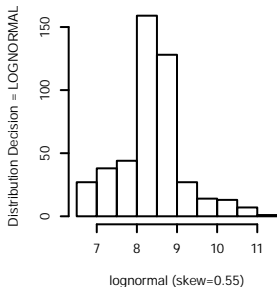

M5\_28885

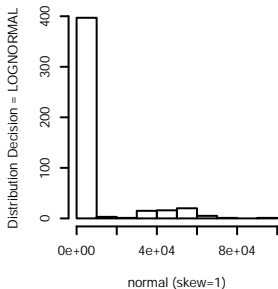

M5\_28885

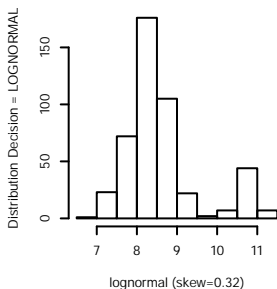

M5\_26858

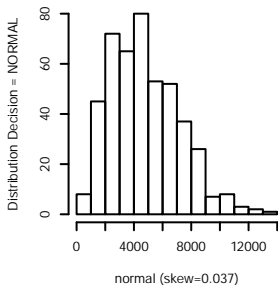

M5\_26858

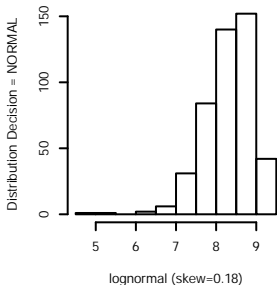

M5\_88810

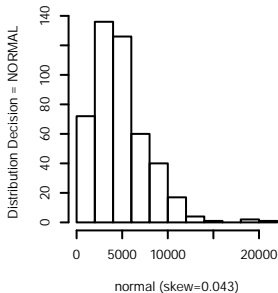

M5\_88810

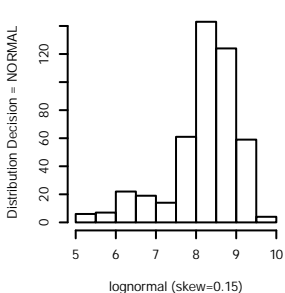

M5\_21574

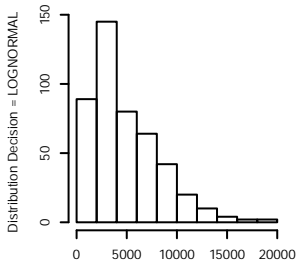

normal (skew=0.44)

M5\_21574

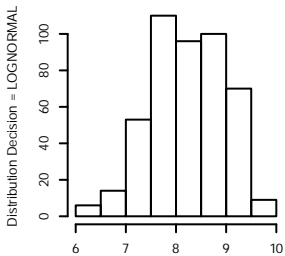

lognormal (skew=0.061)

M5\_61230

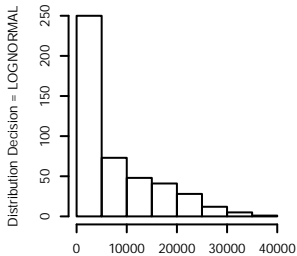

normal (skew=1)

M5\_61230

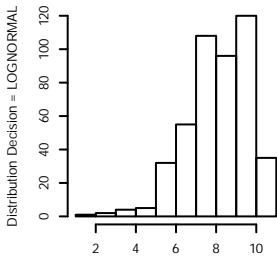

lognormal (skew=0.2)

M5\_00624

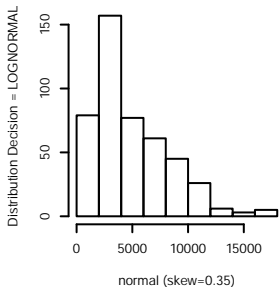

M5\_00624

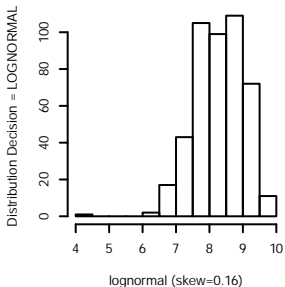

M5\_68313

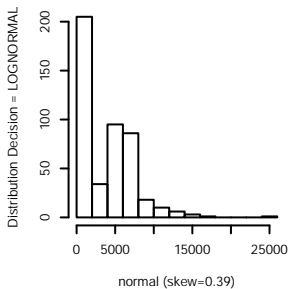

M5\_68313

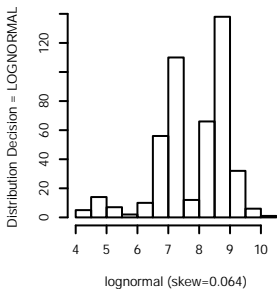



M5\_26922

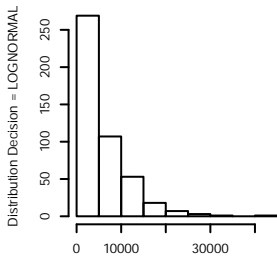

normal (skew=1)

M5\_26922

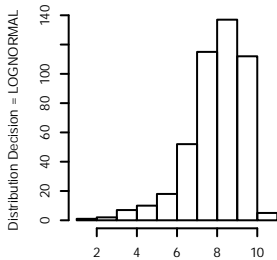

lognormal (skew=0.071)

M5\_73925

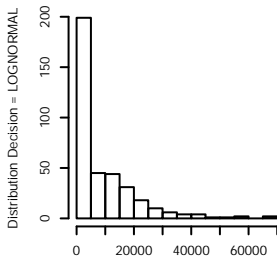

normal (skew=1)

M5\_73925

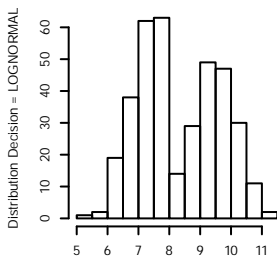

lognormal (skew=0.13)

M5\_83351

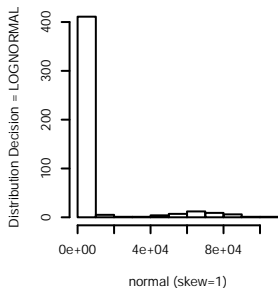

M5\_83351

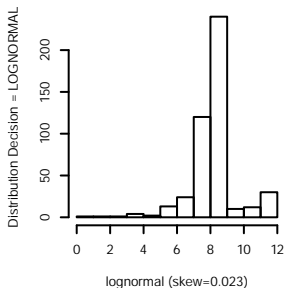

M5\_52091

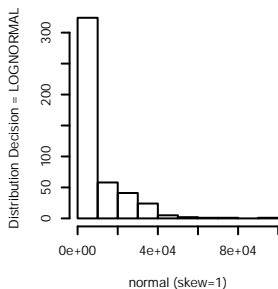

M5\_52091

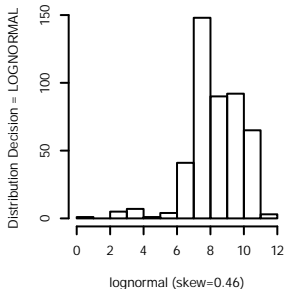

M5\_13324

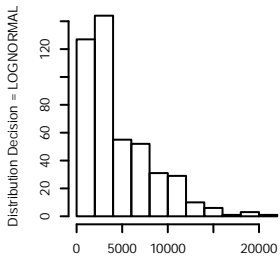

M5\_13324

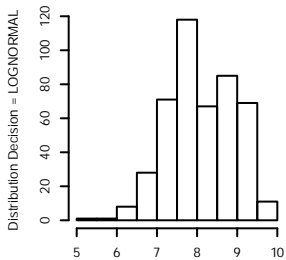

M5\_00850

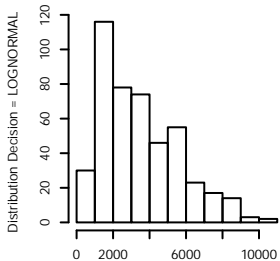

M5\_00850

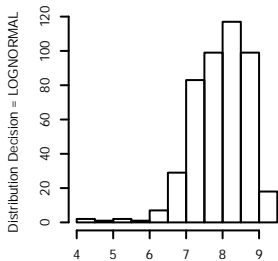

M5\_70717

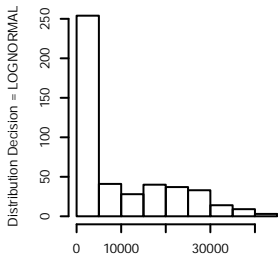

normal (skew=1)

M5\_70717

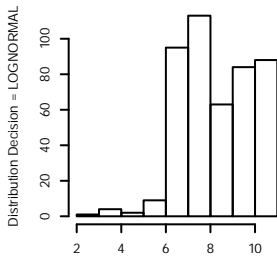

lognormal (skew=0.57)

M5\_99159

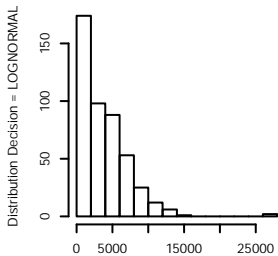

normal (skew=0.43)

M5\_99159

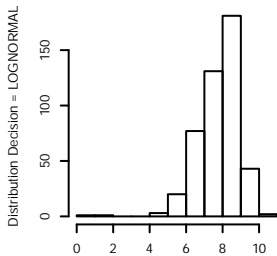

lognormal (skew=0.28)

M5\_79886

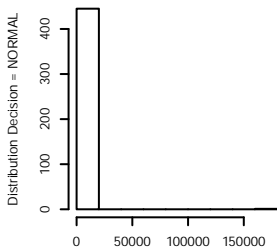

M5\_79886

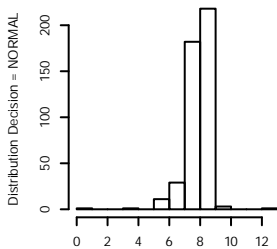

M5\_23833

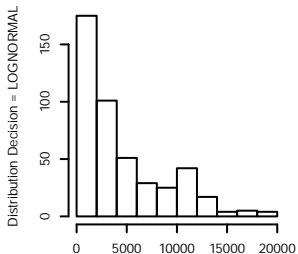

M5\_23833

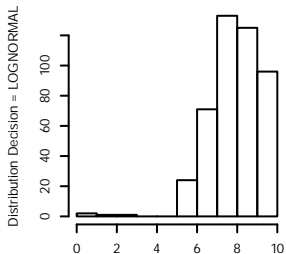

M5\_08490

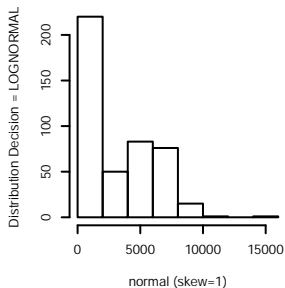

M5\_08490

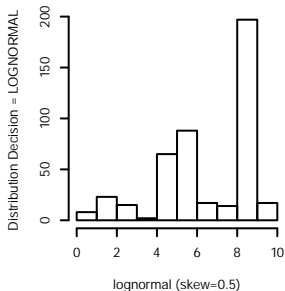

M5\_01616

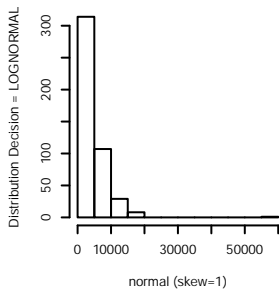

M5\_01616

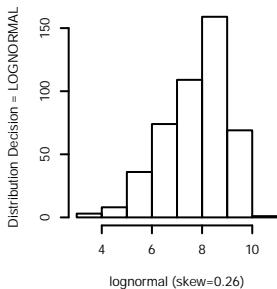

M5\_22169

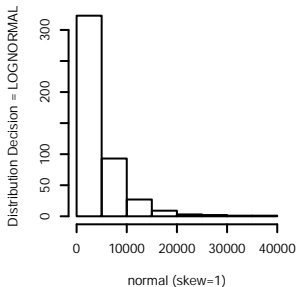

M5\_22169

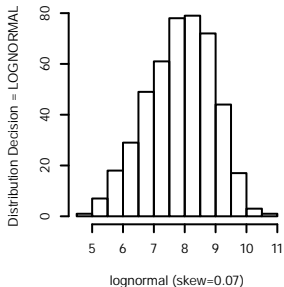

M5\_23566

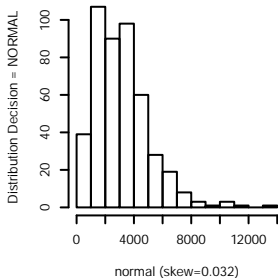

M5\_23566

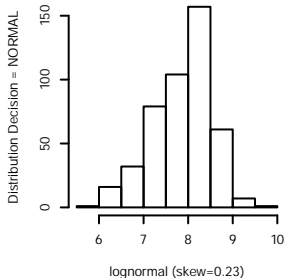

M5\_07925

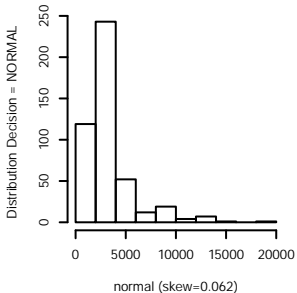

M5\_07925

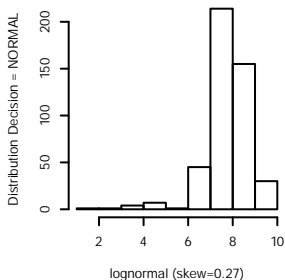

M5\_38087

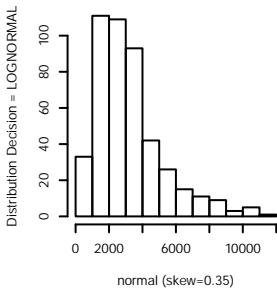

M5\_38087

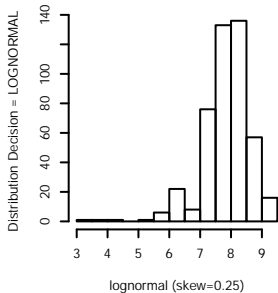



M5\_99203

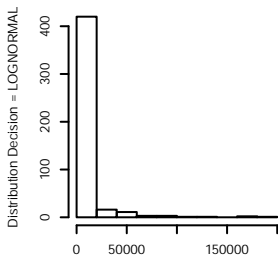

M5\_99203

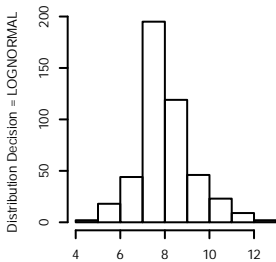

M5\_03592

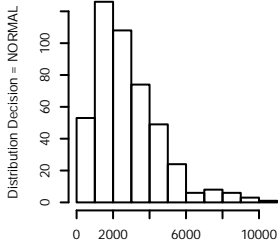

M5\_03592

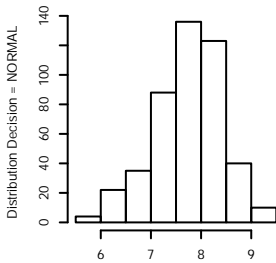

M5\_26844

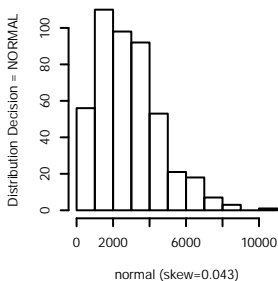

M5\_26844

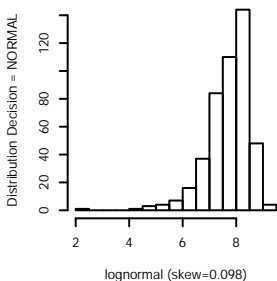

M5\_24232

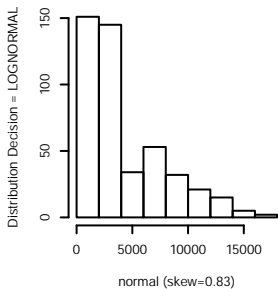

M5\_24232

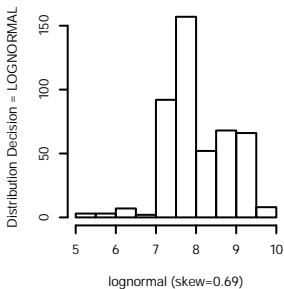

M5\_71392

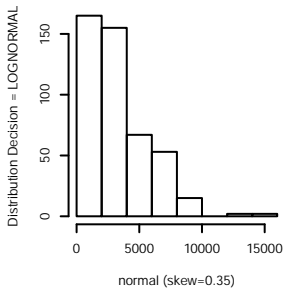

M5\_71392

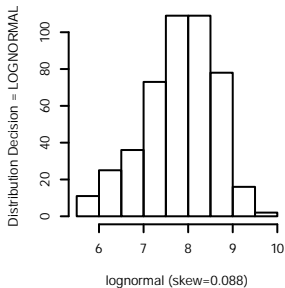

M5\_83311

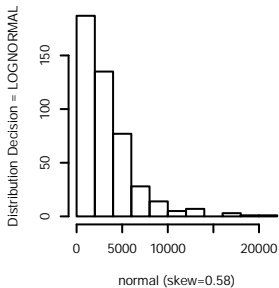

M5\_83311

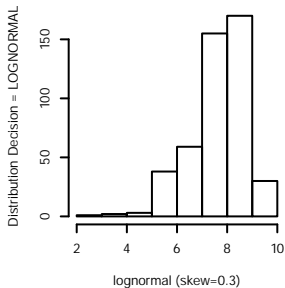

M5\_16445

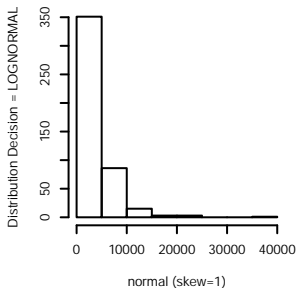

M5\_16445

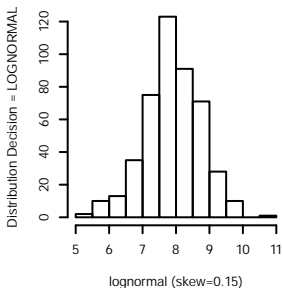

M5\_28311

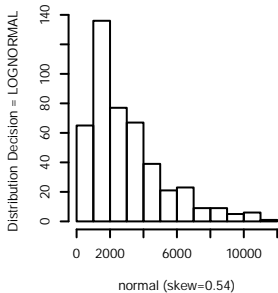

M5\_28311

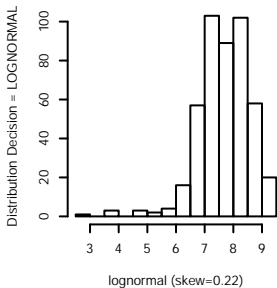

M5\_26876

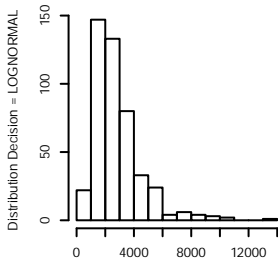

normal (skew=0.58)

M5\_26876

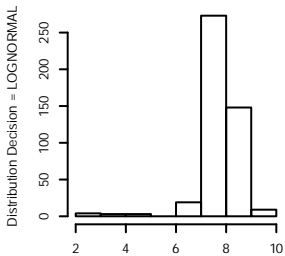

lognormal (skew=0.43)

M5\_38320

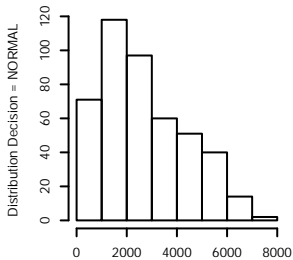

normal (skew=0.3)

M5\_38320

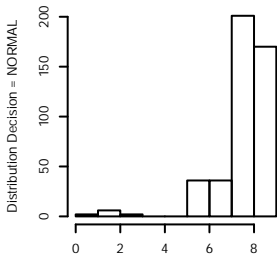

lognormal (skew=3.2)

M5\_16428

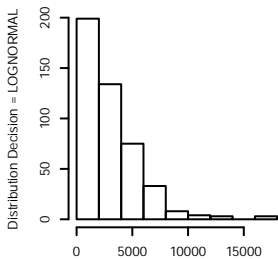

normal (skew=0.83)

M5\_16428

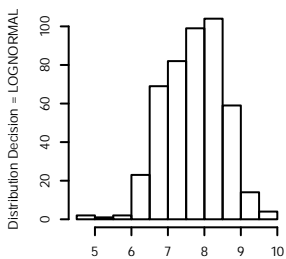

lognormal (skew=0.18)

M5\_37816

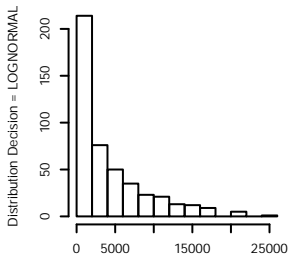

normal (skew=1)

M5\_37816

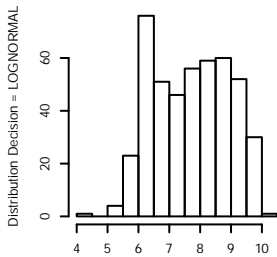

lognormal (skew=0.12)

M5\_07692

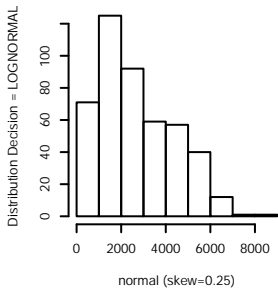

M5\_07692

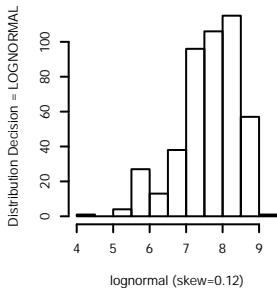

M5\_17797

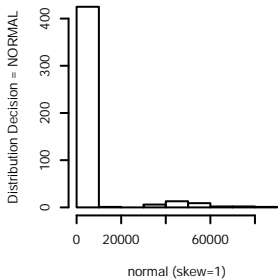

M5\_17797

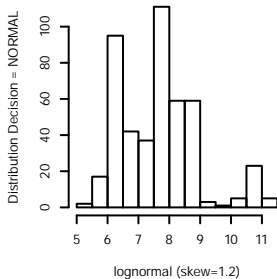

M5\_04425

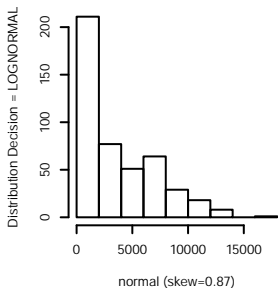

M5\_04425

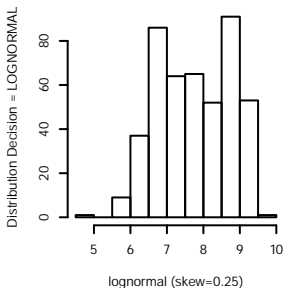

M5\_03091

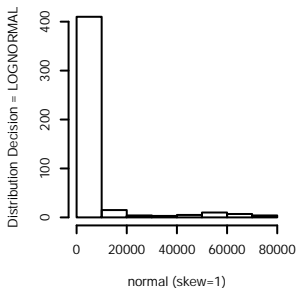

M5\_03091

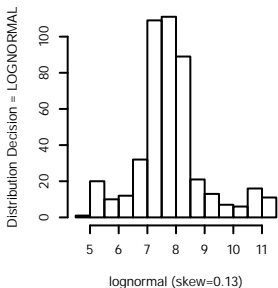



M5\_22652

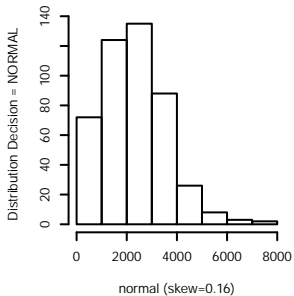

M5\_22652

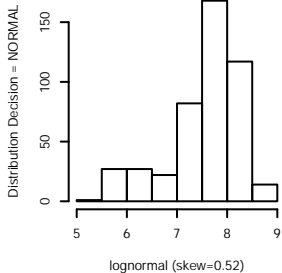

M5\_35373

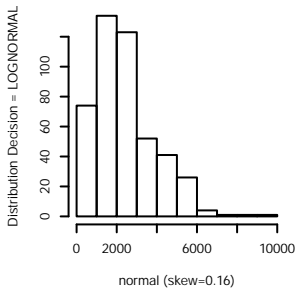

M5\_35373

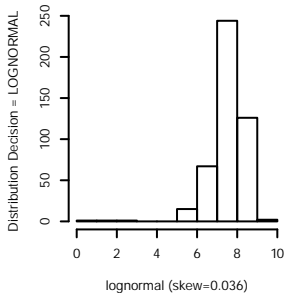

M5\_09642

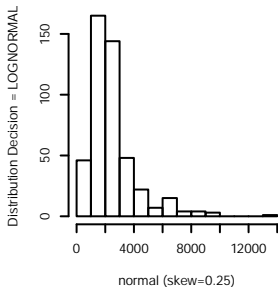

M5\_09642

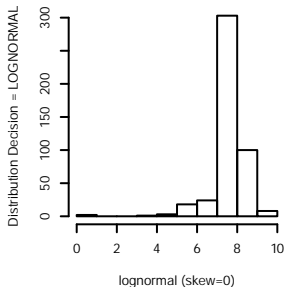

M5\_55826

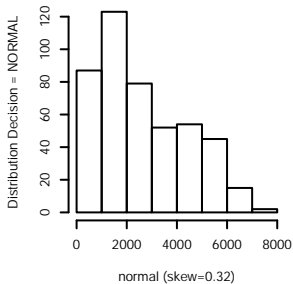

M5\_55826

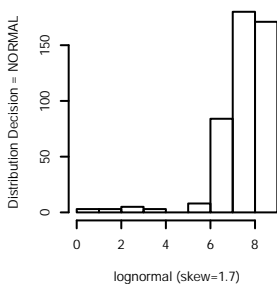

M5\_94266

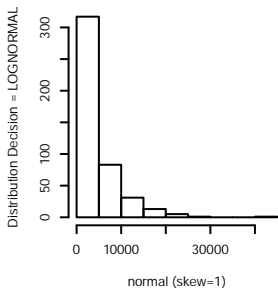

M5\_94266

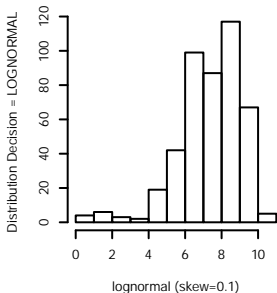

M5\_40265

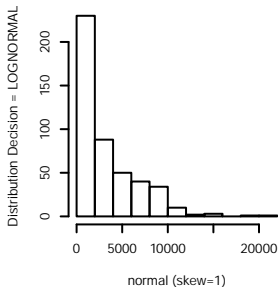

M5\_40265

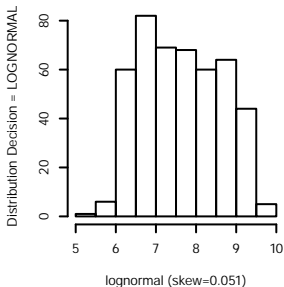

M5\_88822

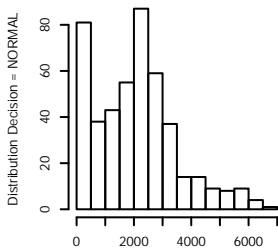

M5\_88822

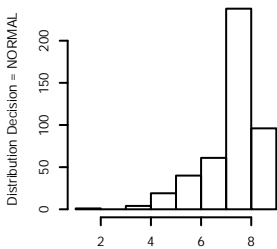

M5\_74686

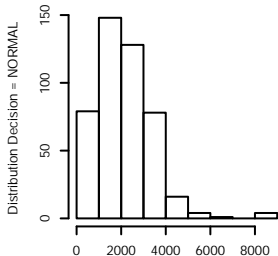

M5\_74686

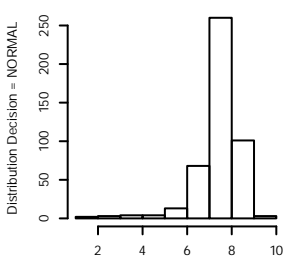

M5\_34717

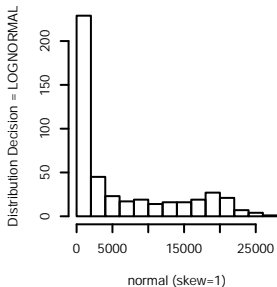

M5\_34717

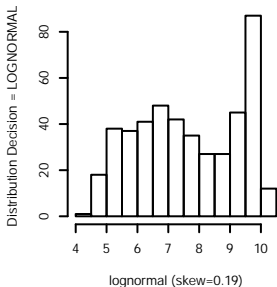

M5\_63733

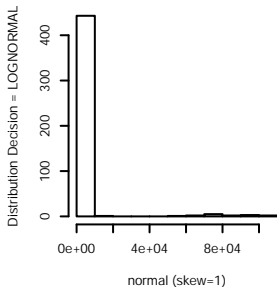

M5\_63733

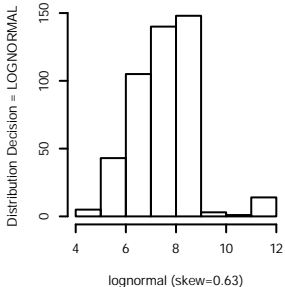

M5\_99942

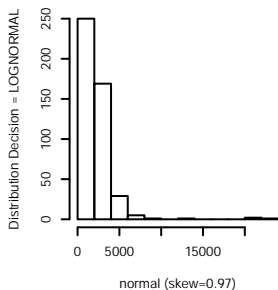

M5\_99942

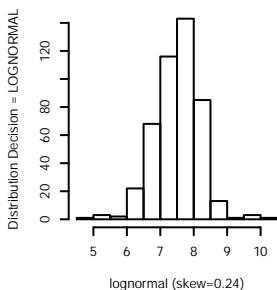

M5\_74206

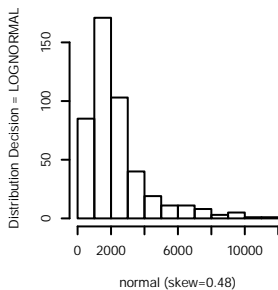

M5\_74206

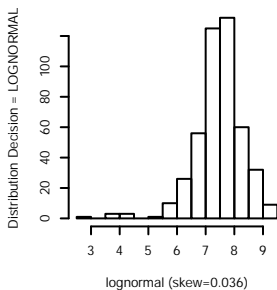

M5\_65868

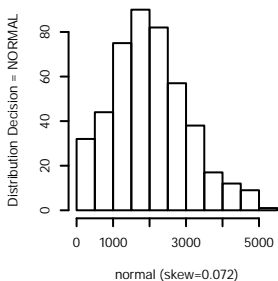

M5\_65868

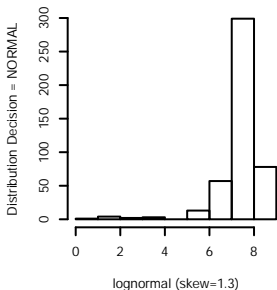

M5\_55829

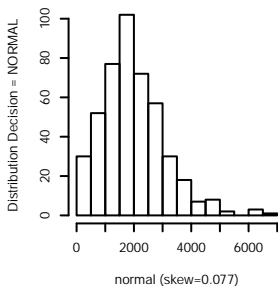

M5\_55829

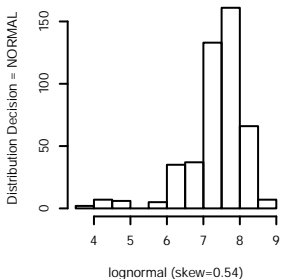

M5\_40252

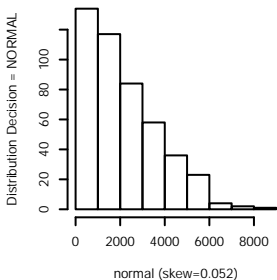

M5\_40252

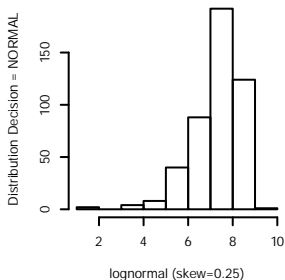

M5\_38057

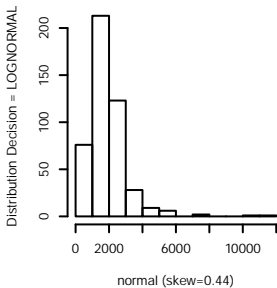

M5\_38057

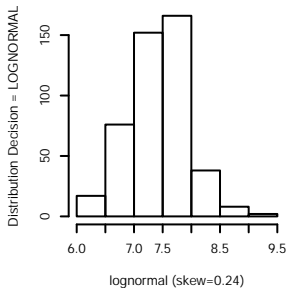



M5\_67932

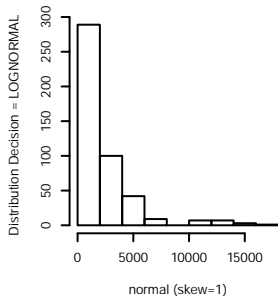

M5\_67932

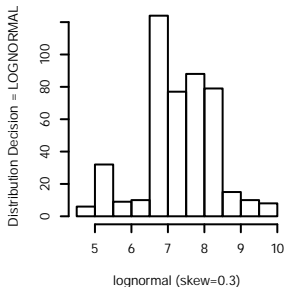

M5\_26860

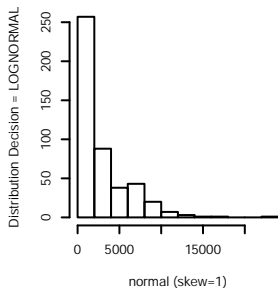

M5\_26860

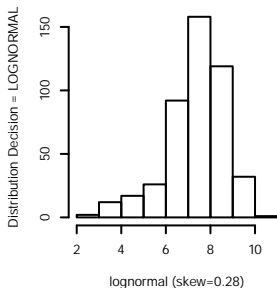

M5\_39428

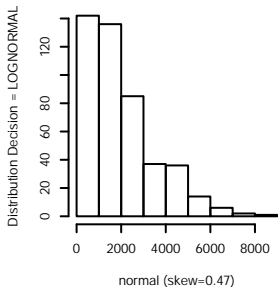

M5\_39428

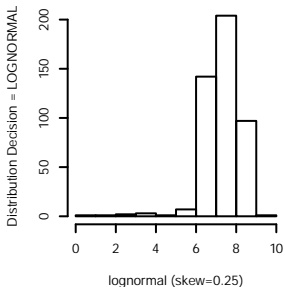

M5\_65026

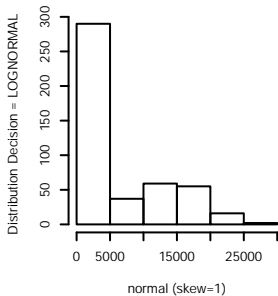

M5\_65026

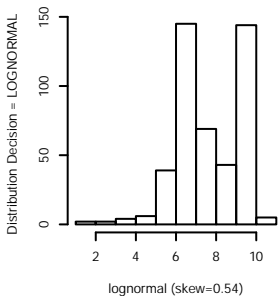

M5\_28330

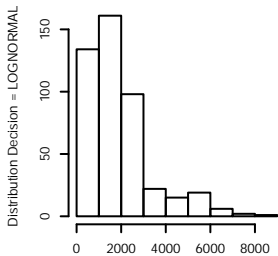

normal (skew=0.41)

M5\_28330

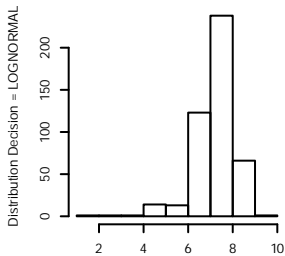

lognormal (skew=0.32)

M5\_09540

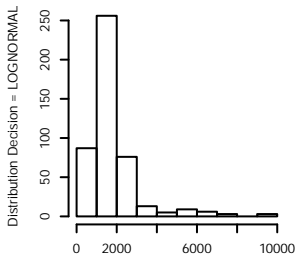

normal (skew=0.67)

M5\_09540

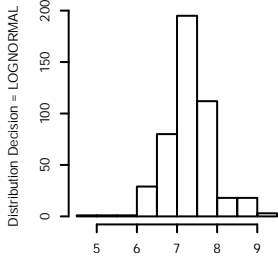

lognormal (skew=0.26)

M5\_00139

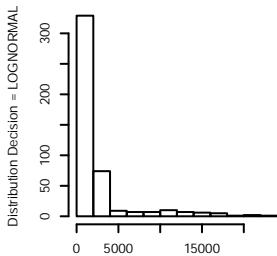

normal (skew=1)

M5\_00139

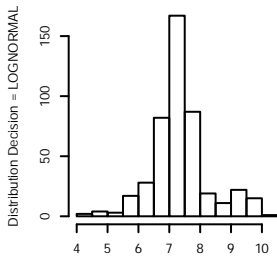

lognormal (skew=0.11)

M5\_08731

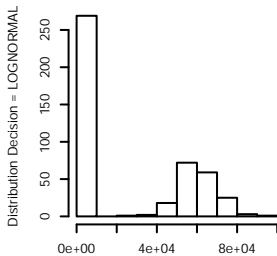

normal (skew=1)

M5\_08731

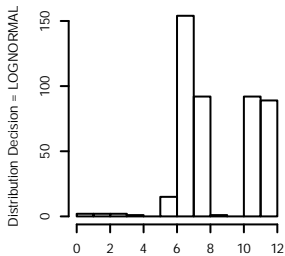

lognormal (skew=0.81)

M5\_37785

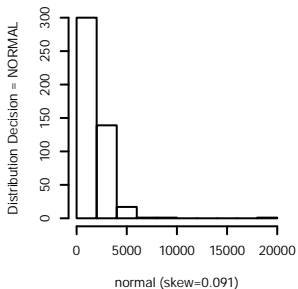

M5\_37785

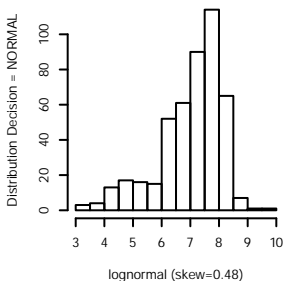

M5\_30990

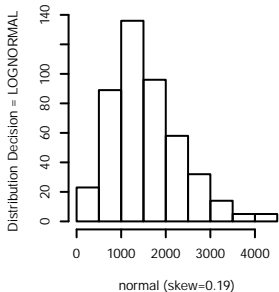

M5\_30990

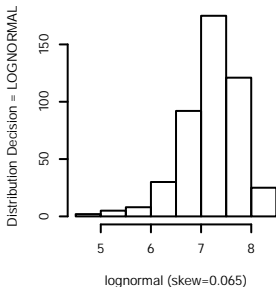

M5\_08772

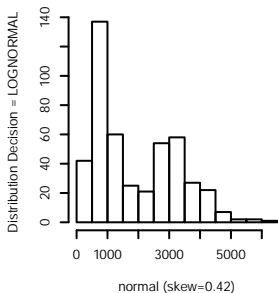

M5\_08772

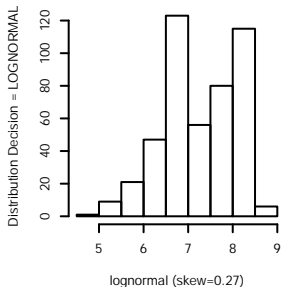

M5\_19174

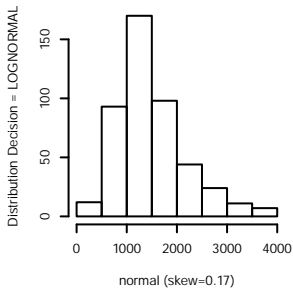

M5\_19174

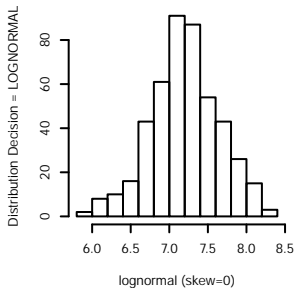

M5\_25281

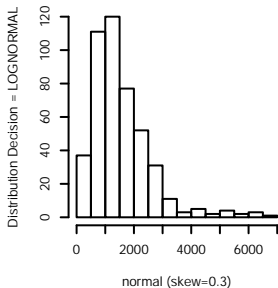

M5\_25281

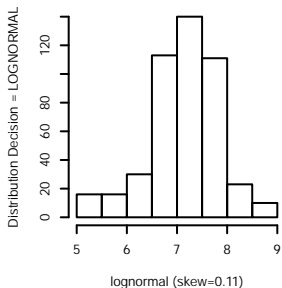

M5\_94988

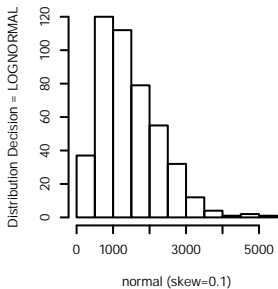

M5\_94988

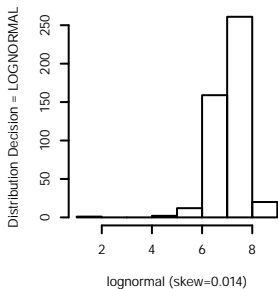

M5\_70983

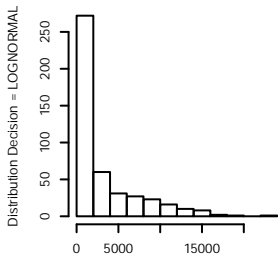

normal (skew=1)

M5\_70983

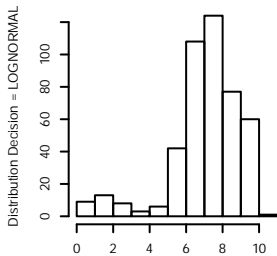

lognormal (skew=0.34)

M5\_99153

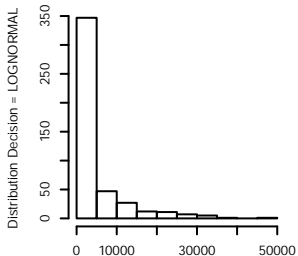

normal (skew=1)

M5\_99153

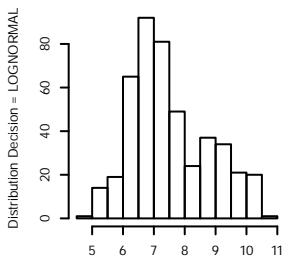

lognormal (skew=0.36)



M5\_18787

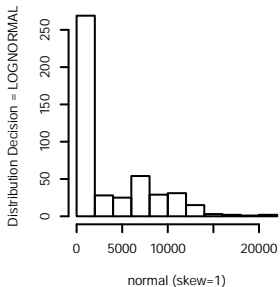

M5\_18787

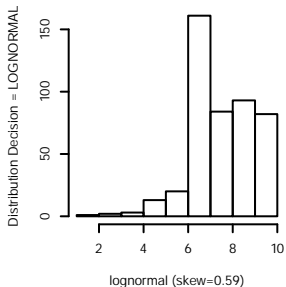

M5\_04346

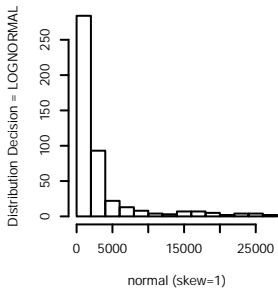

M5\_04346

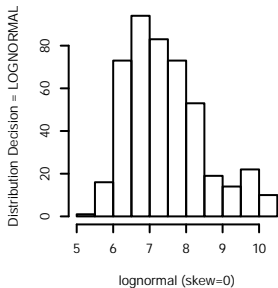

M5\_37822

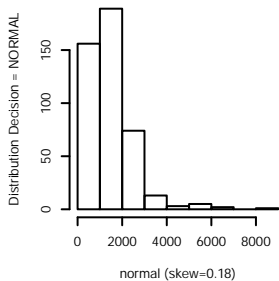

M5\_37822

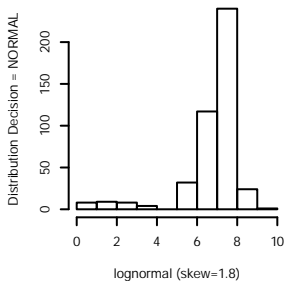

M5\_23837

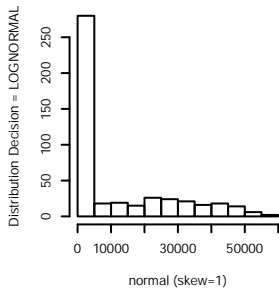

M5\_23837

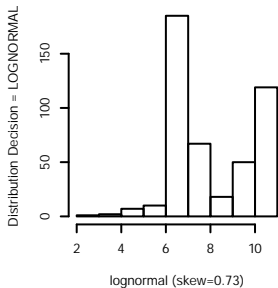

M5\_31657

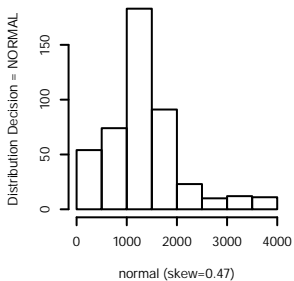

M5\_31657

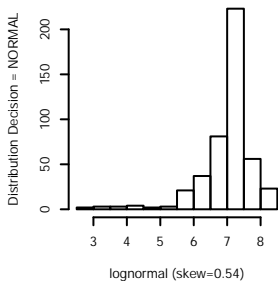

M5\_26864

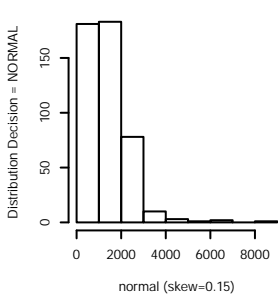

M5\_26864

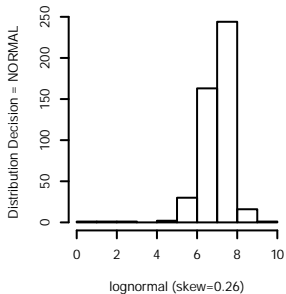

M5\_28377

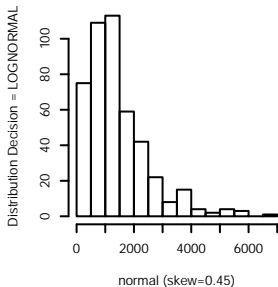

M5\_28377

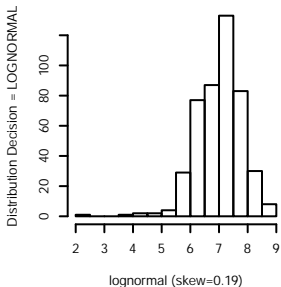

M5\_39455

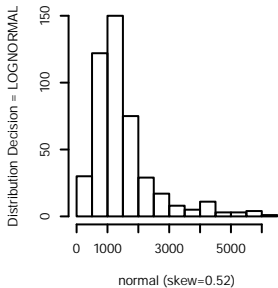

M5\_39455

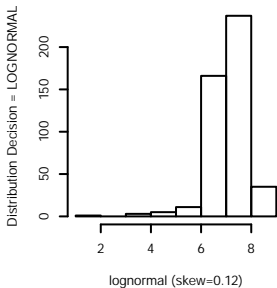

M5\_70289

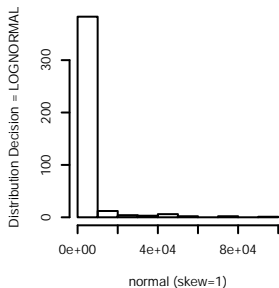

M5\_70289

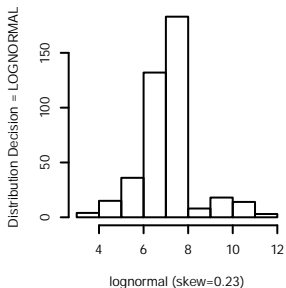

M5\_71416

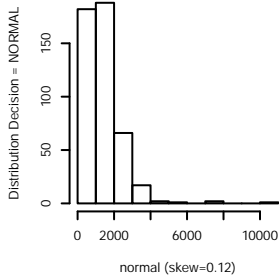

M5\_71416

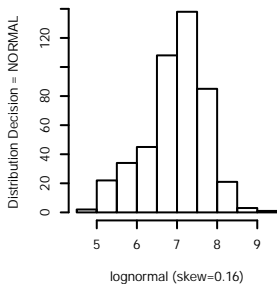

M5\_26910

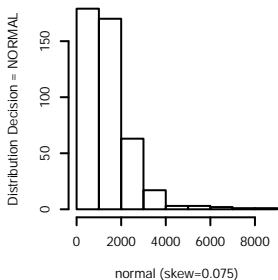

M5\_26910

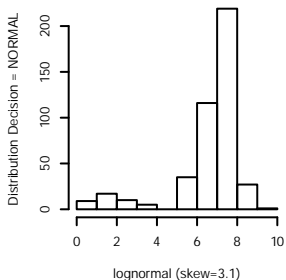

M5\_77404

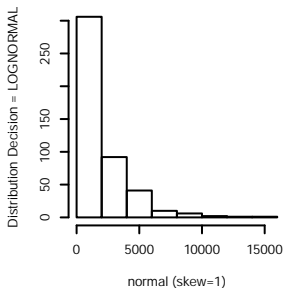

M5\_77404

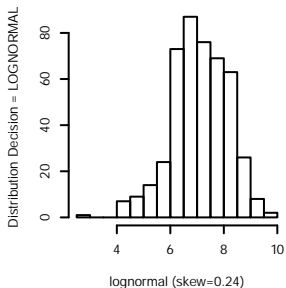

M5\_55340

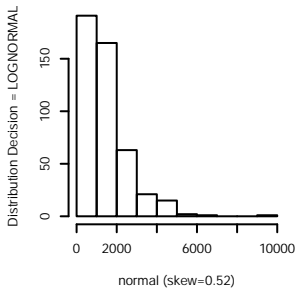

M5\_55340

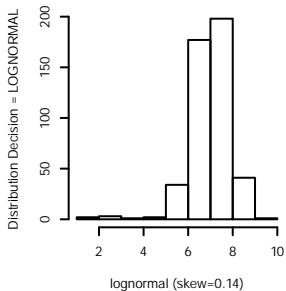

M5\_58744

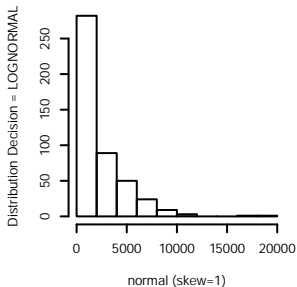

M5\_58744

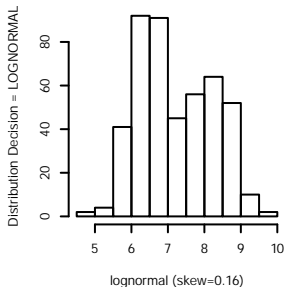

M5\_19032

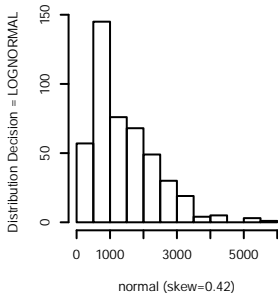

M5\_19032

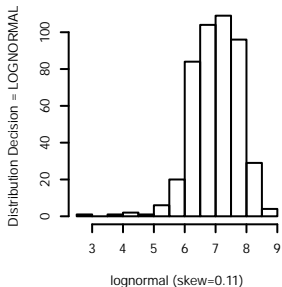

M5\_72694

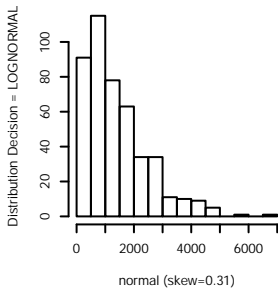

M5\_72694

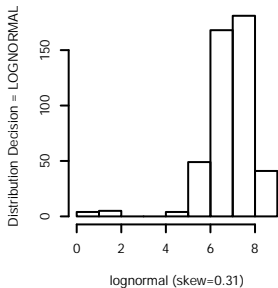



M5\_00471

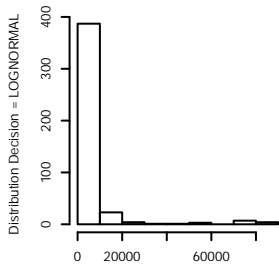

normal (skew=1)

M5\_00471

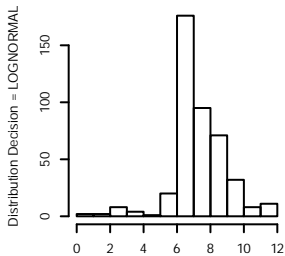

lognormal (skew=0.69)

M5\_69625

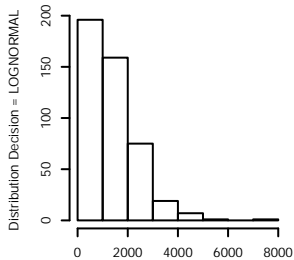

normal (skew=0.21)

M5\_69625

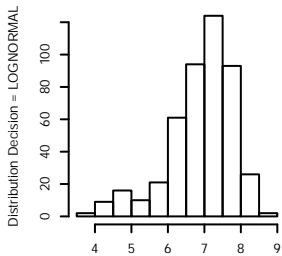

lognormal (skew=0.055)

M5\_23973

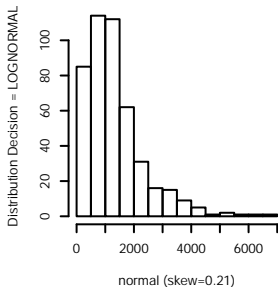

M5\_23973

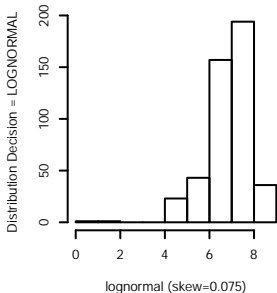

M5\_00448

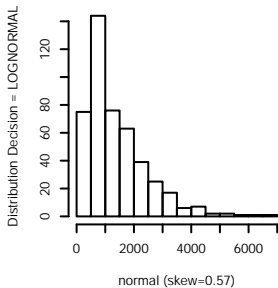

M5\_00448

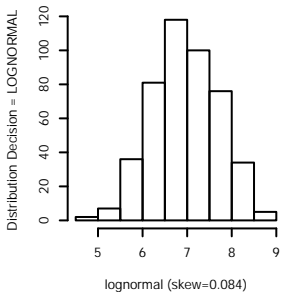

M5\_39431

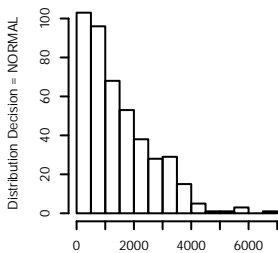

normal (skew=0.3)

M5\_39431

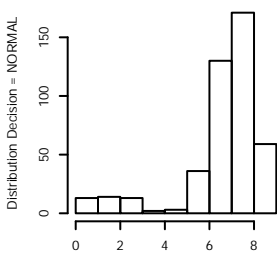

lognormal (skew=6)

M5\_55836

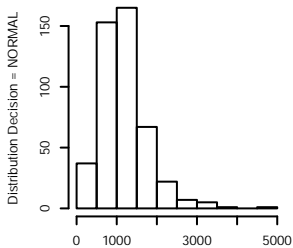

normal (skew=0.017)

M5\_55836

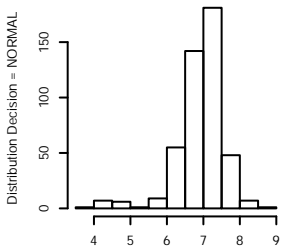

lognormal (skew=0.061)

M5\_99130

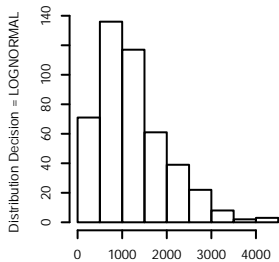

normal (skew=0.12)

M5\_99130

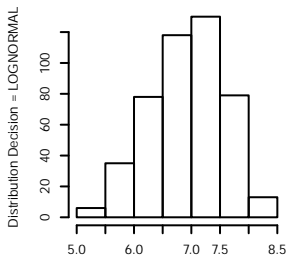

lognormal (skew=0.089)

M5\_03761

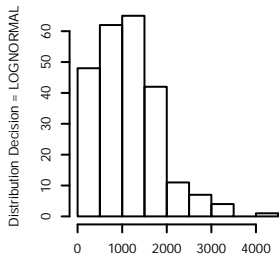

normal (skew=0.35)

M5\_03761

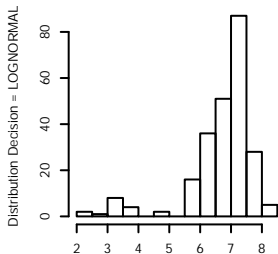

lognormal (skew=0.21)

M5\_13961

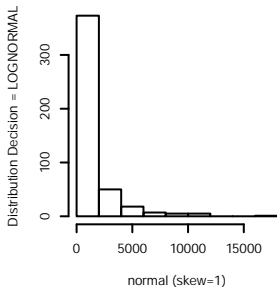

M5\_13961

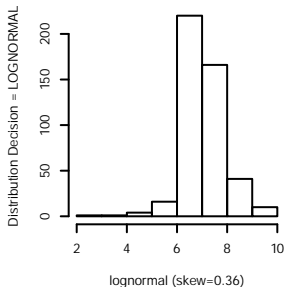

M5\_37821

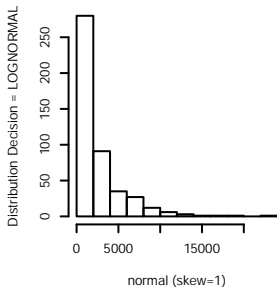

M5\_37821

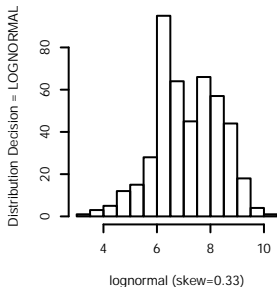

M5\_39873

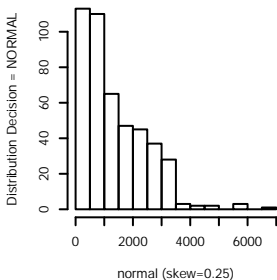

M5\_39873

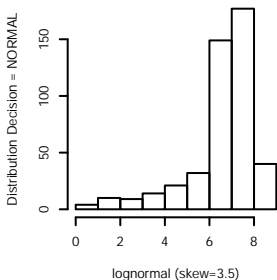

M5\_14535

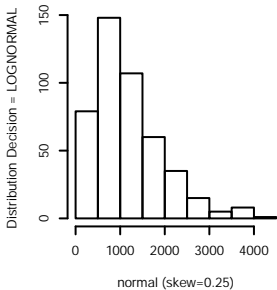

M5\_14535

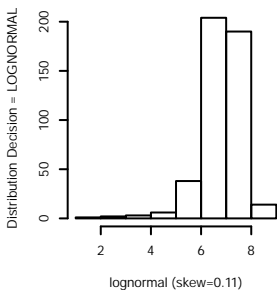

M5\_28572

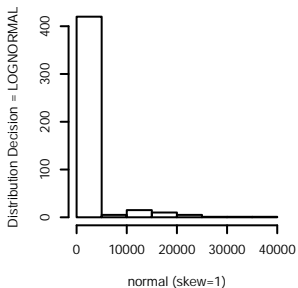

M5\_28572

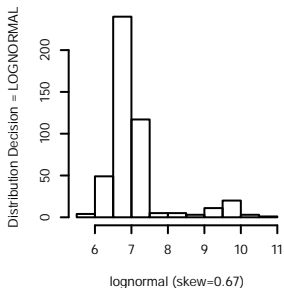

M5\_27017

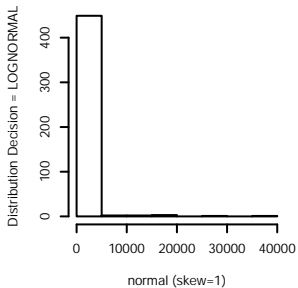

M5\_27017

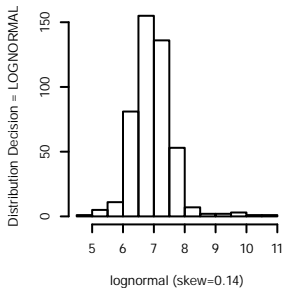

M5\_65895

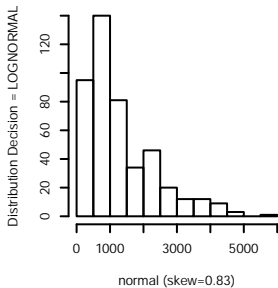

M5\_65895

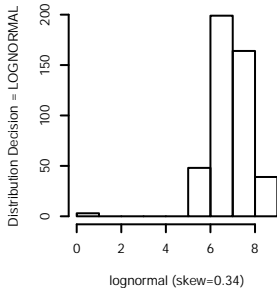

M5\_83322

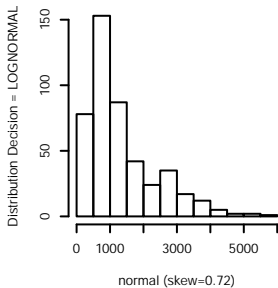

M5\_83322

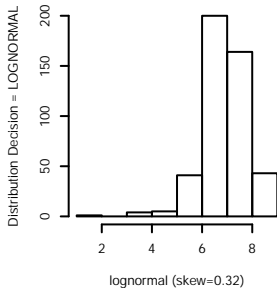



M5\_99218

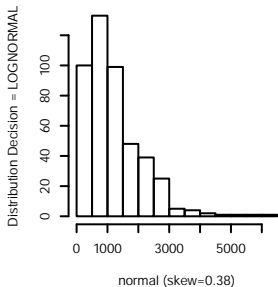

M5\_99218

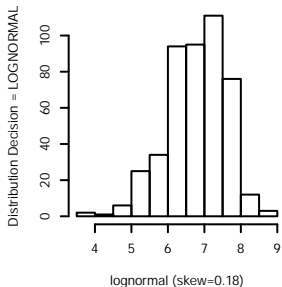

M5\_35972

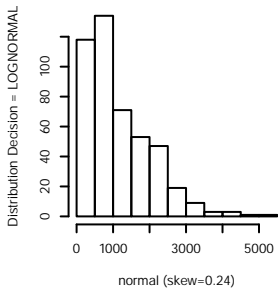

M5\_35972

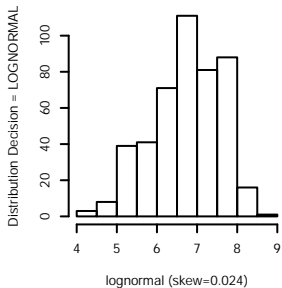

M5\_81112

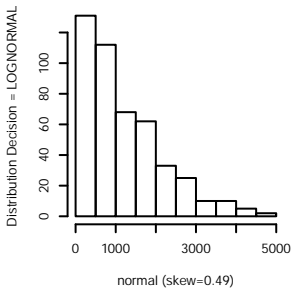

M5\_81112

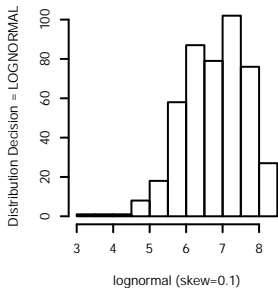

M5\_26850

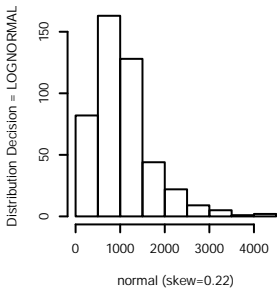

M5\_26850

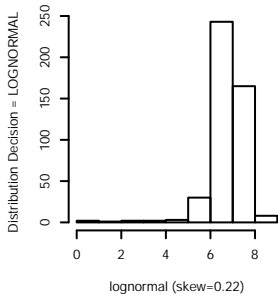

M5\_10901

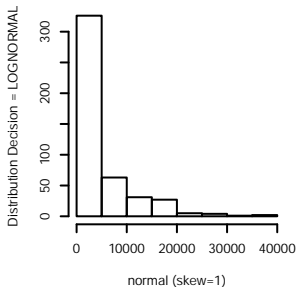

M5\_10901

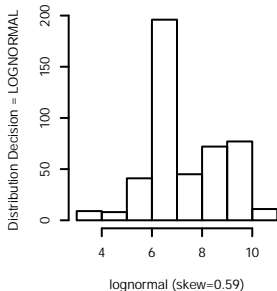

M5\_63416

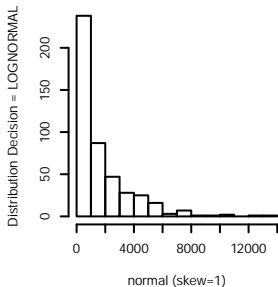

M5\_63416

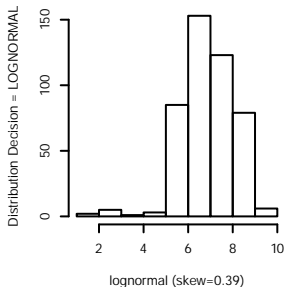

M5\_37286

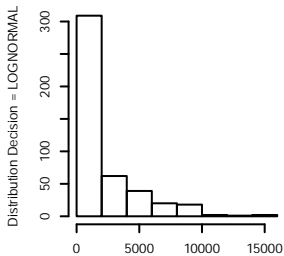

normal (skew=1)

M5\_37286

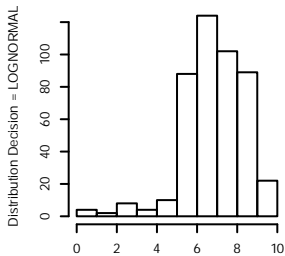

lognormal (skew=0.45)

M5\_81268

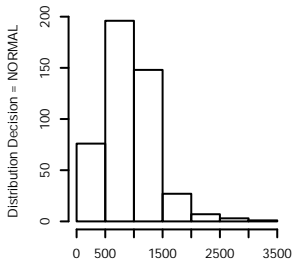

normal (skew=0.18)

M5\_81268

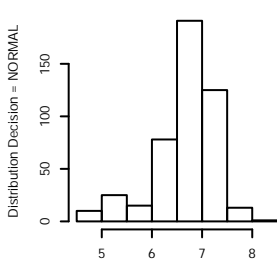

lognormal (skew=0.33)

M5\_26851

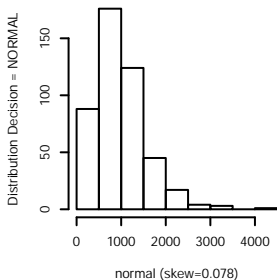

M5\_26851

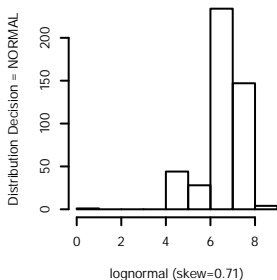

M5\_26906

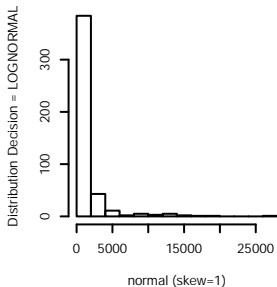

M5\_26906

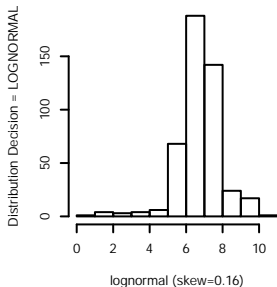

M5\_23191

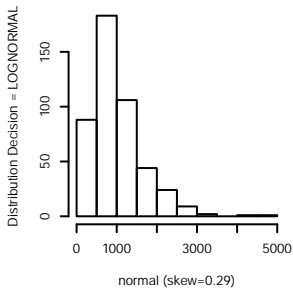

M5\_23191

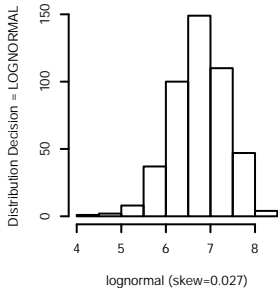

M5\_53384

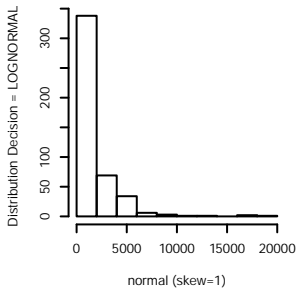

M5\_53384

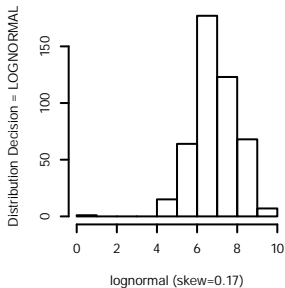

M5\_29268

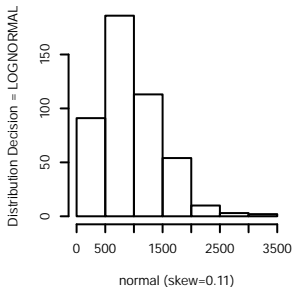

M5\_29268

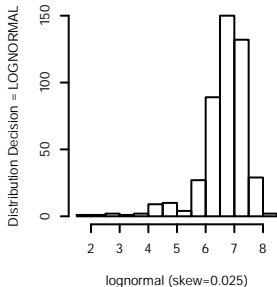

M5\_83244

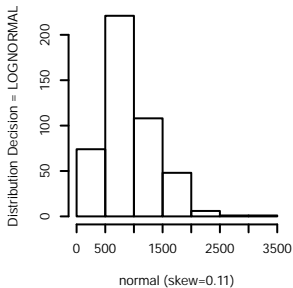

M5\_83244

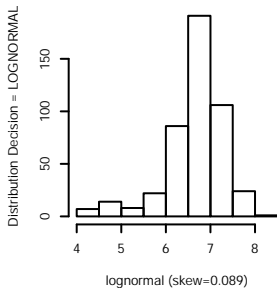

M5\_23521

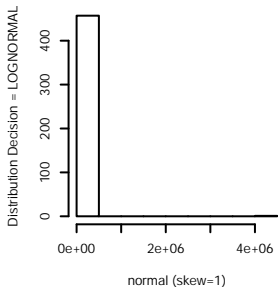

M5\_23521

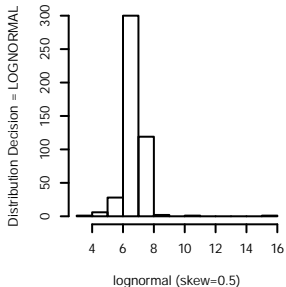

M5\_13960

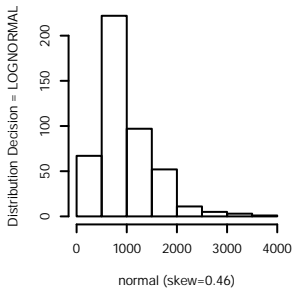

M5\_13960

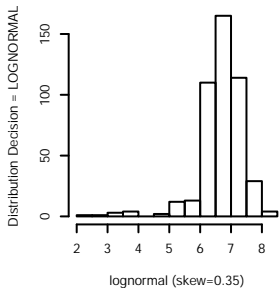



M5\_99129

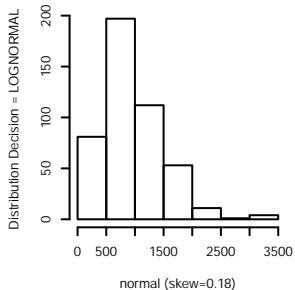

M5\_99129

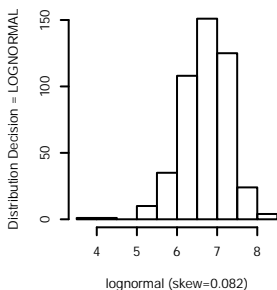

M5\_68365

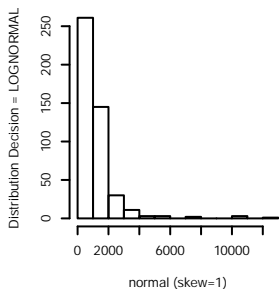

M5\_68365

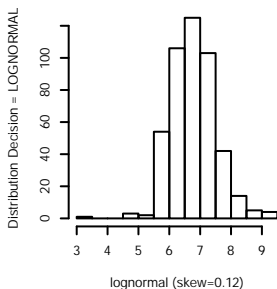

M5\_26846

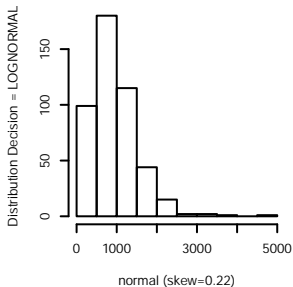

M5\_26846

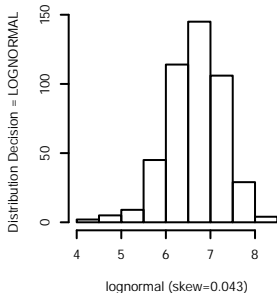

M5\_27352

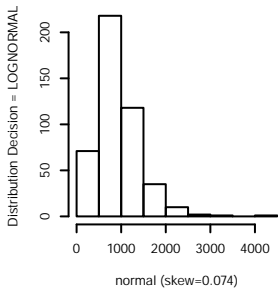

M5\_27352

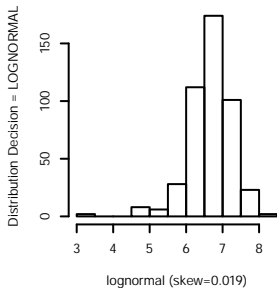

M5\_13697

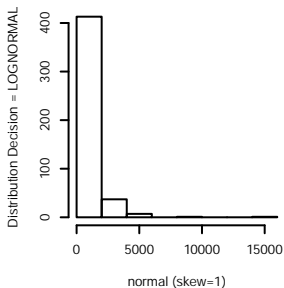

M5\_13697

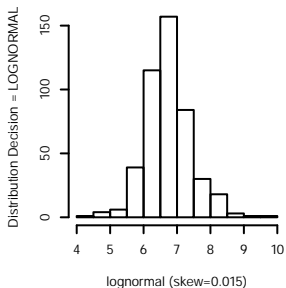

M5\_89052

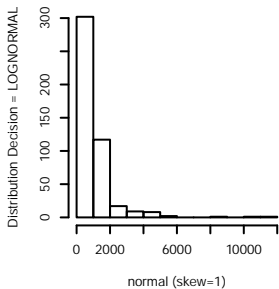

M5\_89052

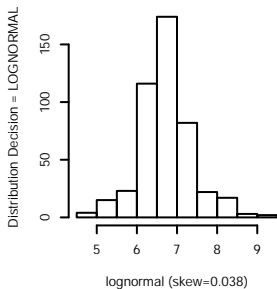

M5\_70003

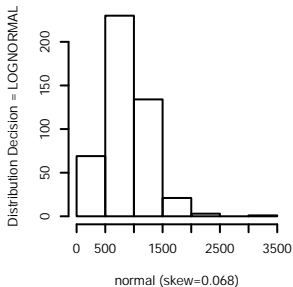

M5\_70003

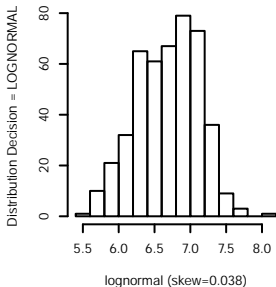

M5\_28983

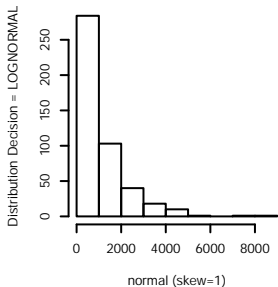

M5\_28983

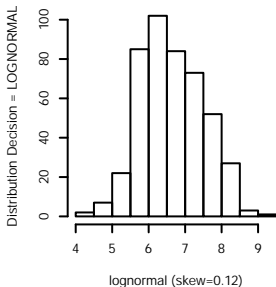

M5\_20259

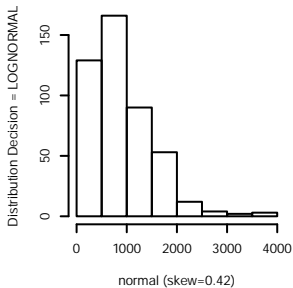

M5\_20259

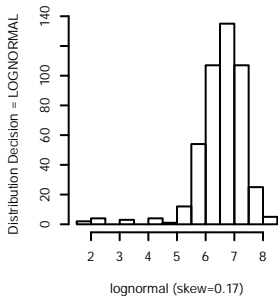

M5\_99091

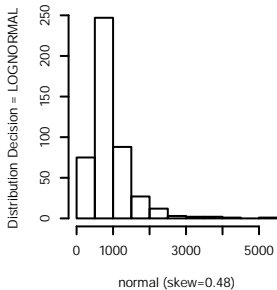

M5\_99091

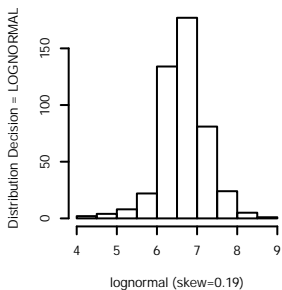

M5\_38106

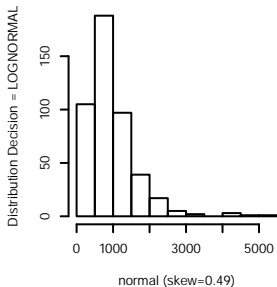

M5\_38106

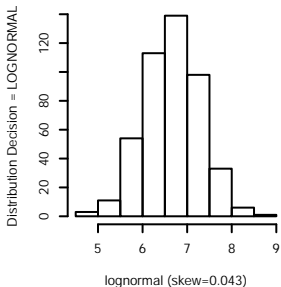

M5\_23531

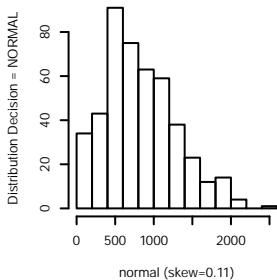

M5\_23531

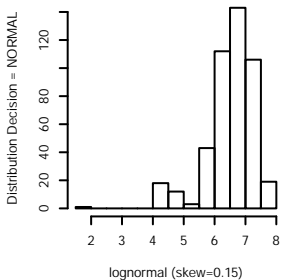

M5\_28673

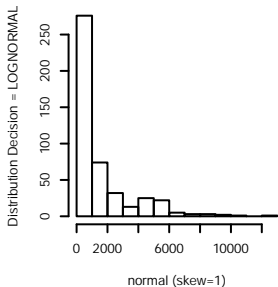

M5\_28673

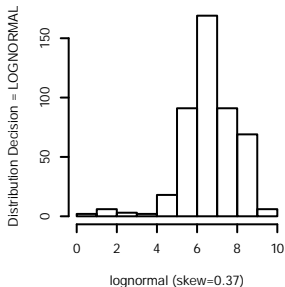

M5\_94986

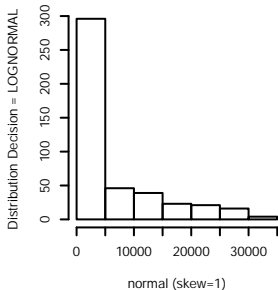

M5\_94986

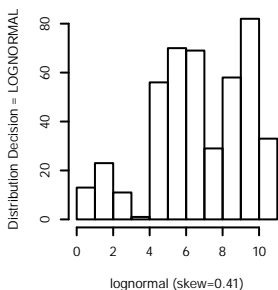

M5\_37823

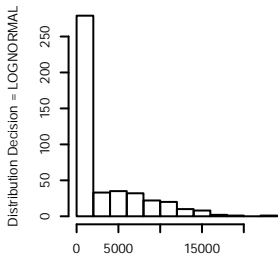

normal (skew=1)

M5\_37823

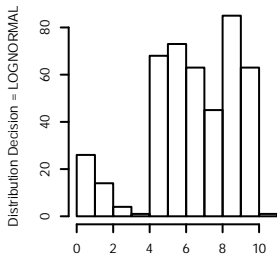

lognormal (skew=0.47)

M5\_18951

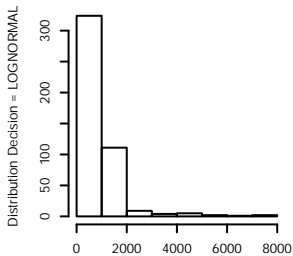

normal (skew=0.97)

M5\_18951

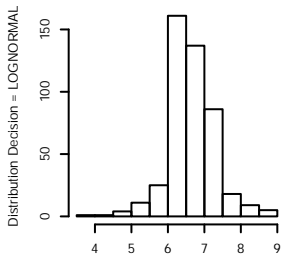

lognormal (skew=0.38)



M5\_23548

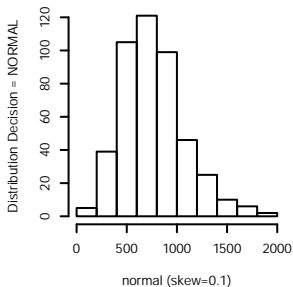

M5\_23548

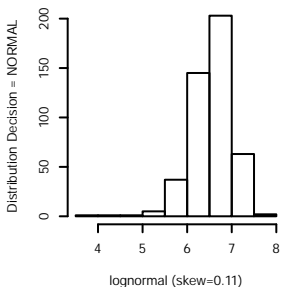

M5\_24849

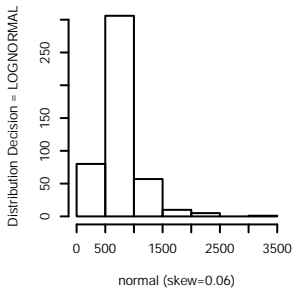

M5\_24849

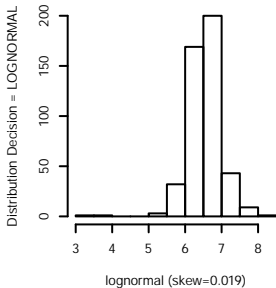

M5\_20889

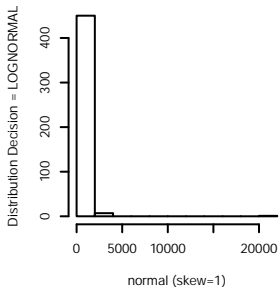

M5\_20889

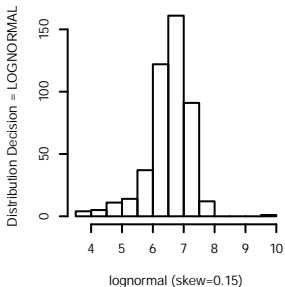

M5\_23506

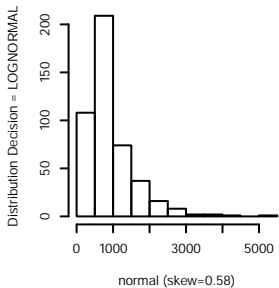

M5\_23506

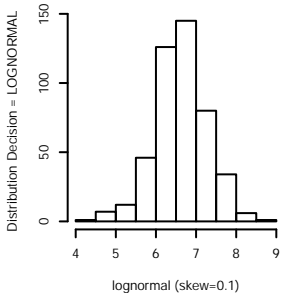

M5\_38896

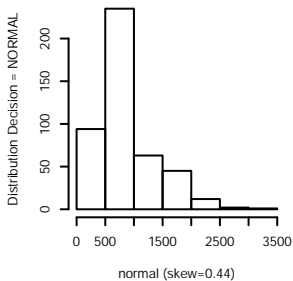

M5\_38896

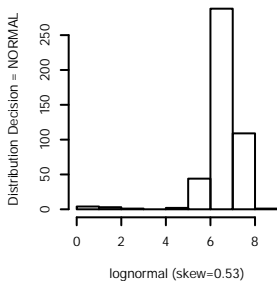

M5\_10904

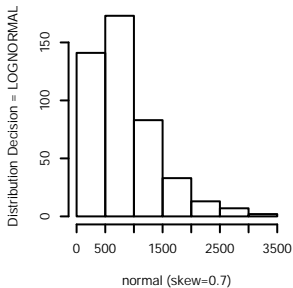

M5\_10904

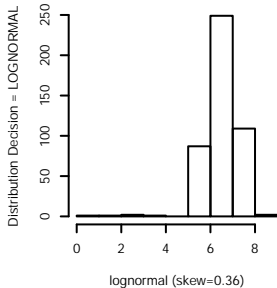

M5\_81216

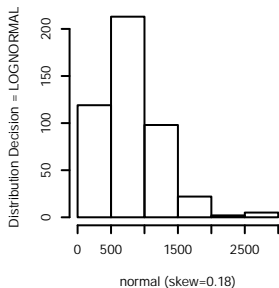

M5\_81216

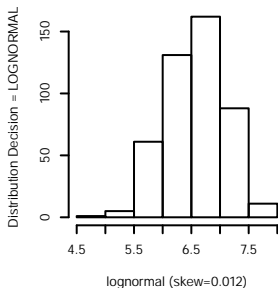

M5\_07223

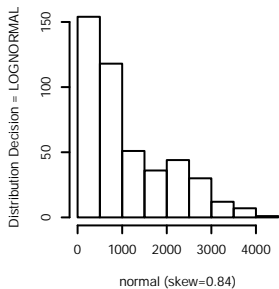

M5\_07223

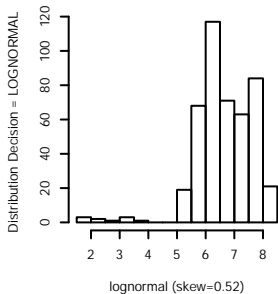

M5\_00920

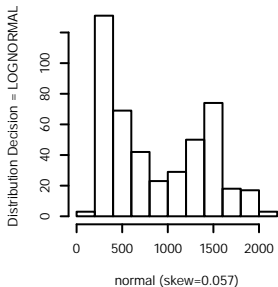

M5\_00920

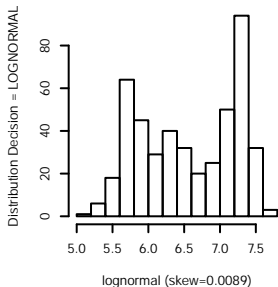

M5\_25555

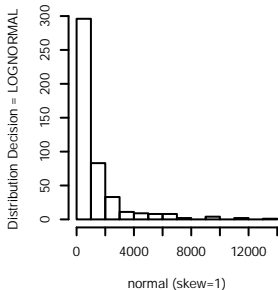

M5\_25555

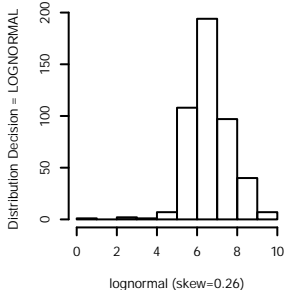

M5\_19501

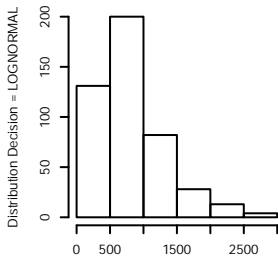

normal (skew=0.18)

M5\_19501

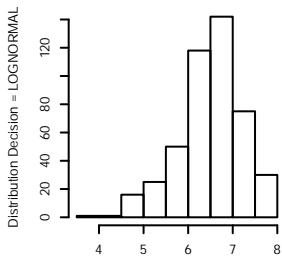

lognormal (skew=0.09)

M5\_68152

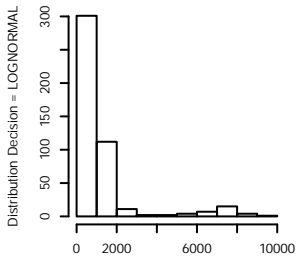

normal (skew=1)

M5\_68152

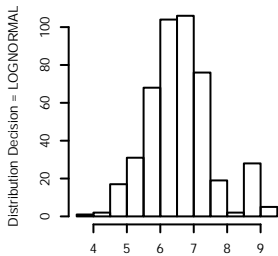

lognormal (skew=0.2)

M5\_31132

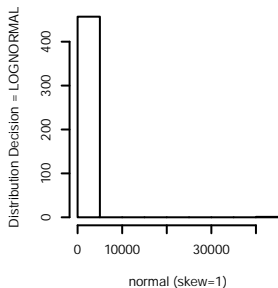

M5\_31132

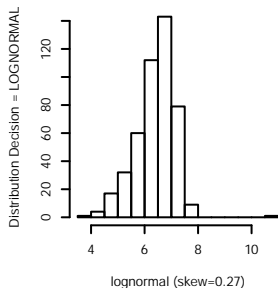

M5\_70888

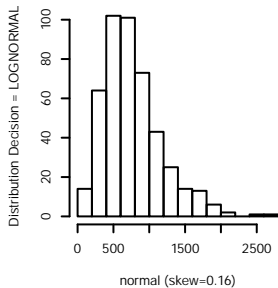

M5\_70888

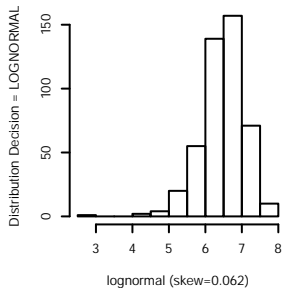

M5\_00379

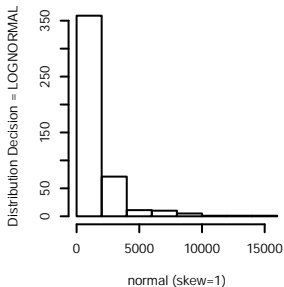

M5\_00379

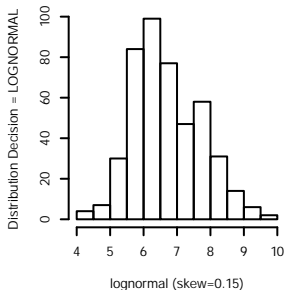

M5\_00906

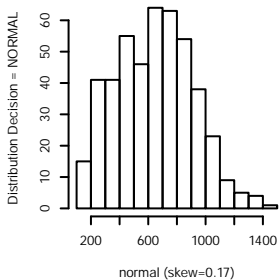

M5\_00906

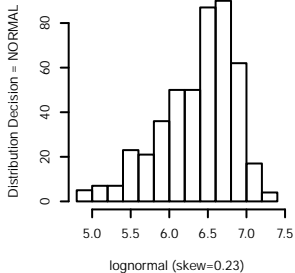



M5\_16767

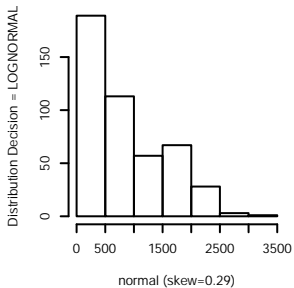

M5\_16767

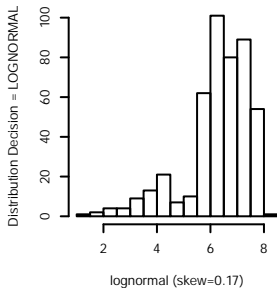

M5\_26845

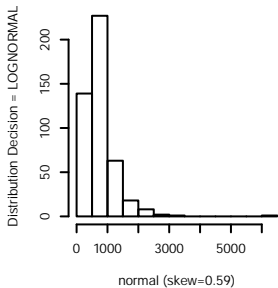

M5\_26845

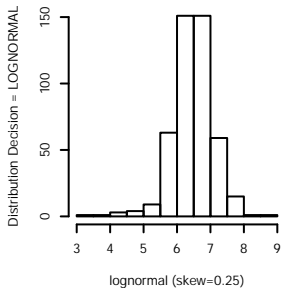

M5\_52756\_mixed\_spec\_with\_citrullin

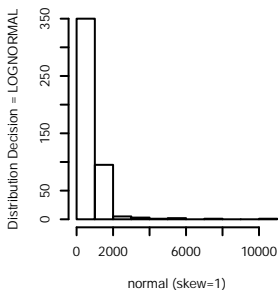

M5\_52756\_mixed\_spec\_with\_citrullin

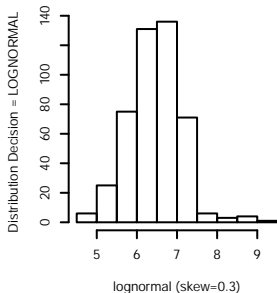

M5\_06308

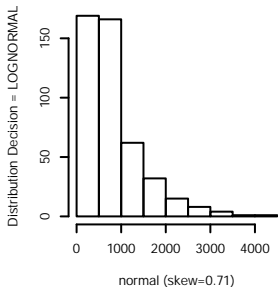

M5\_06308

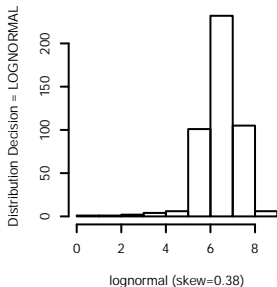

M5\_62792

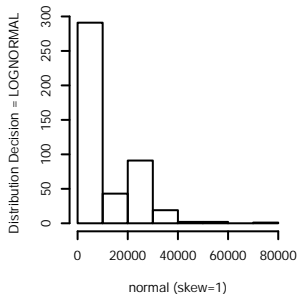

M5\_62792

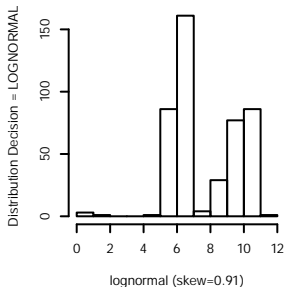

M5\_22050

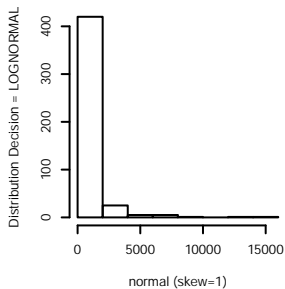

M5\_22050

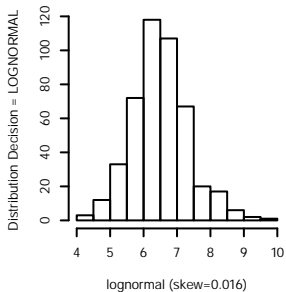

M5\_01887

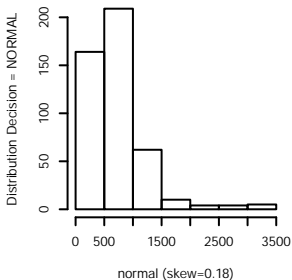

M5\_01887

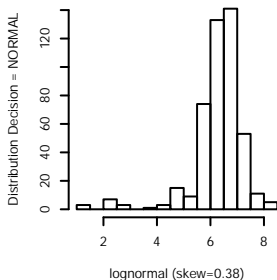

M5\_26903

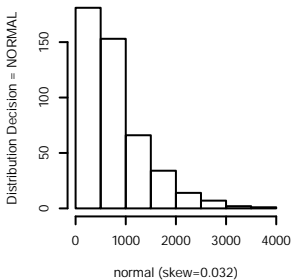

M5\_26903

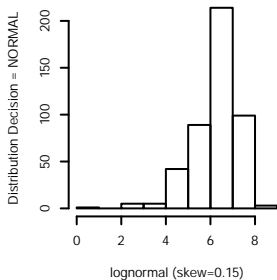

M5\_73450

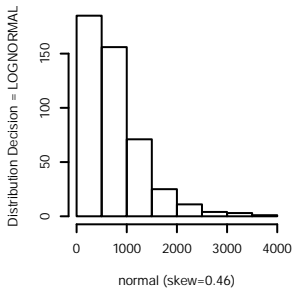

M5\_73450

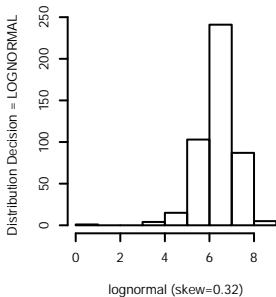

M5\_28143

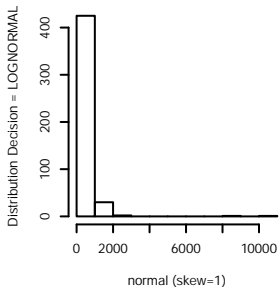

M5\_28143

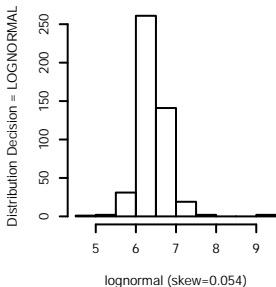

M5\_29880

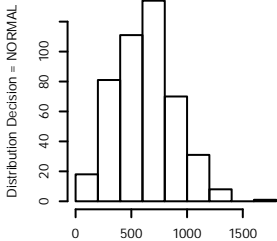

normal (skew=0.086)

M5\_29880

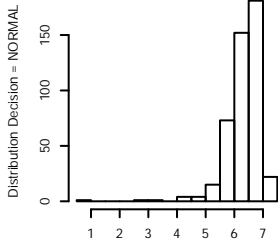

lognormal (skew=0.37)

M5\_26923

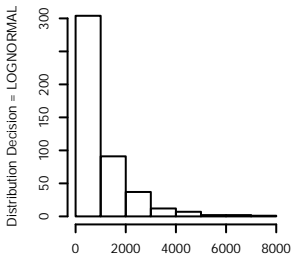

normal (skew=1)

M5\_26923

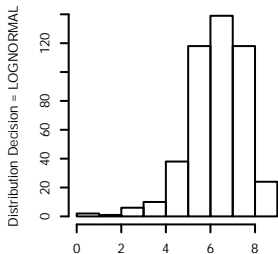

lognormal (skew=0.14)

M5\_28583

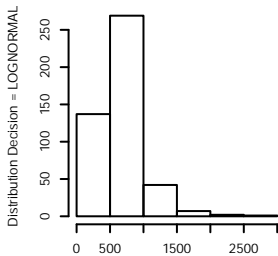

M5\_28583

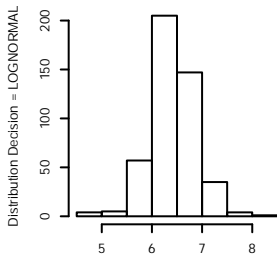

M5\_37474

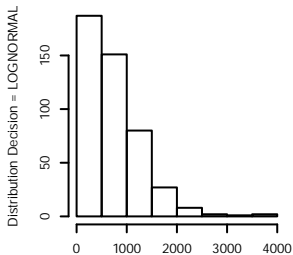

M5\_37474

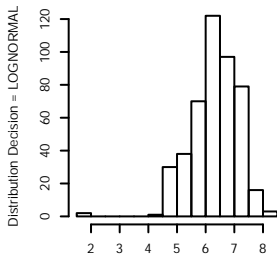

lognormal (skew=0.066)

M5\_39966

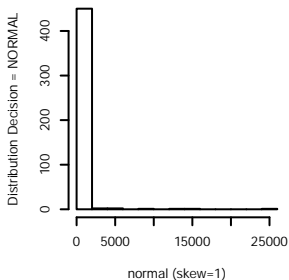

M5\_39966

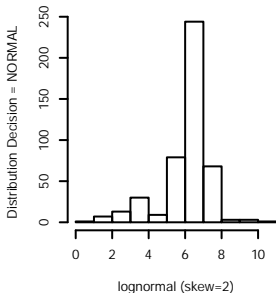

M5\_11888

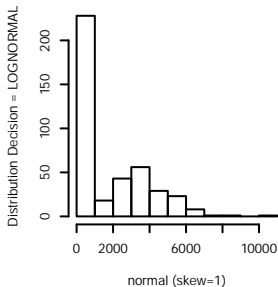

M5\_11888

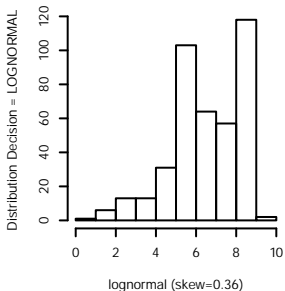



M5\_19484

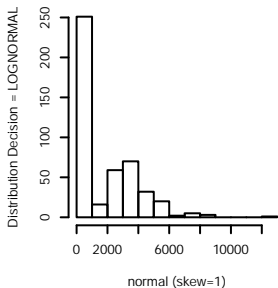

M5\_19484

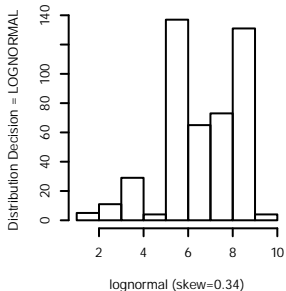

M5\_24551

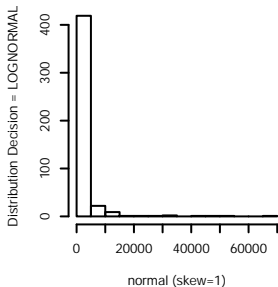

M5\_24551

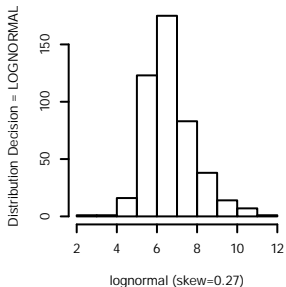

M5\_40257

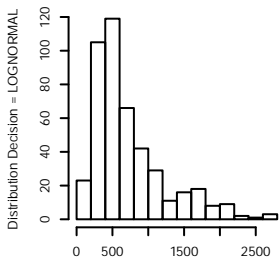

normal (skew=0.61)

M5\_40257

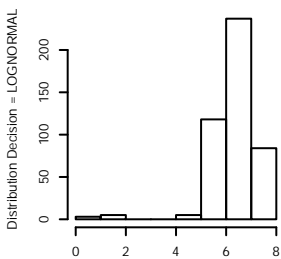

lognormal (skew=0.53)

M5\_37804

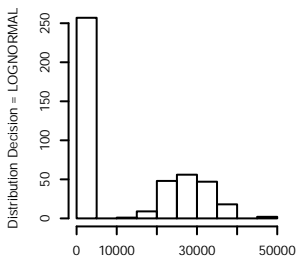

normal (skew=1)

M5\_37804

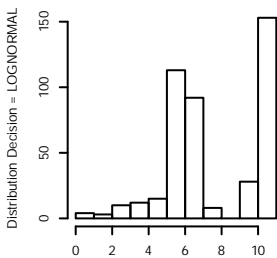

lognormal (skew=0.75)

M5\_26908

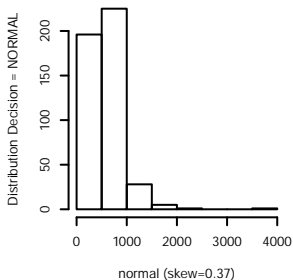

M5\_26908

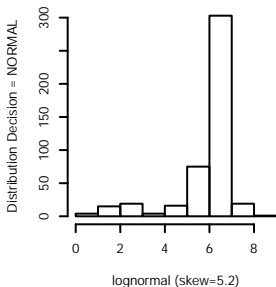

M5\_15504

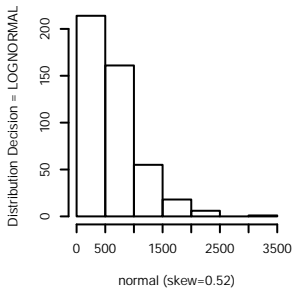

M5\_15504

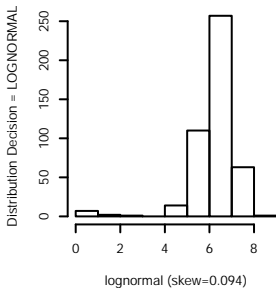

M5\_59447

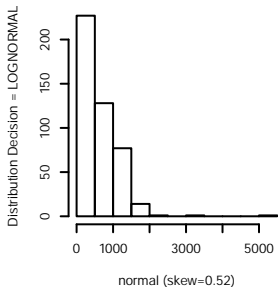

M5\_59447

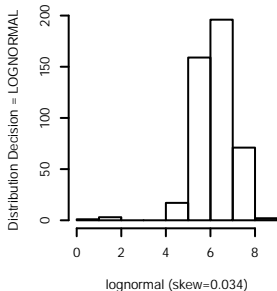

M5\_81148

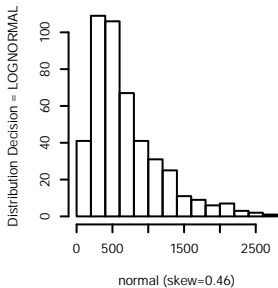

M5\_81148

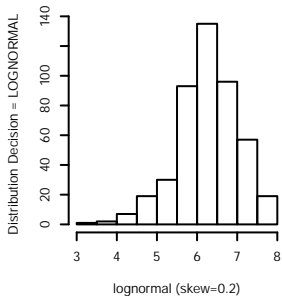

M5\_35678

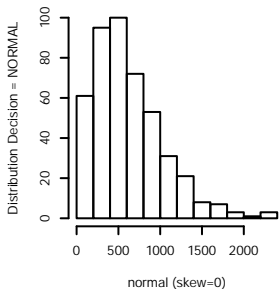

M5\_35678

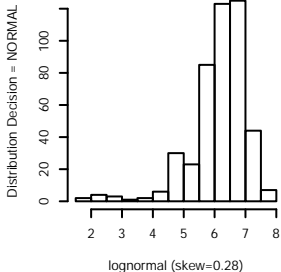

M5\_24350

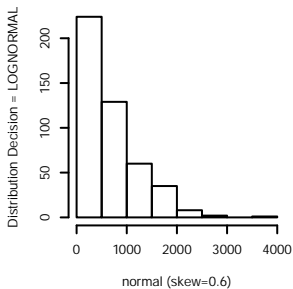

M5\_24350

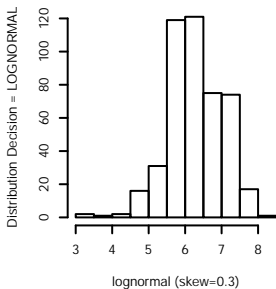

M5\_12279

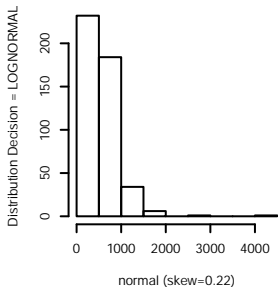

M5\_12279

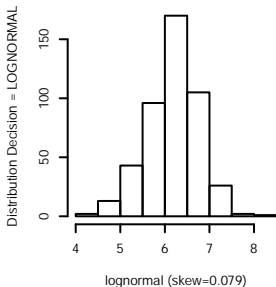

M5\_24859

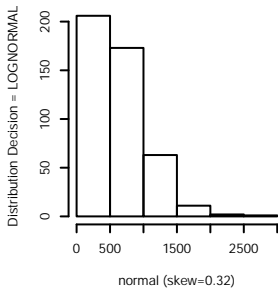

M5\_24859

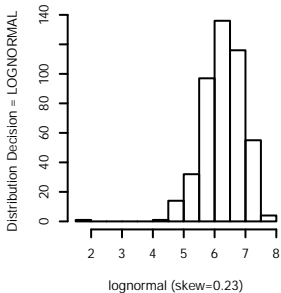

M5\_40264

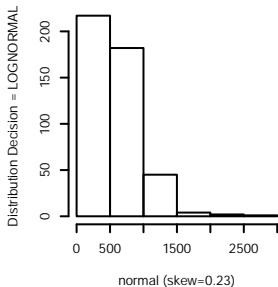

M5\_40264

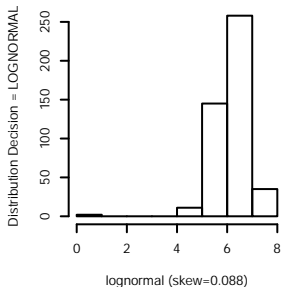

M5\_39186

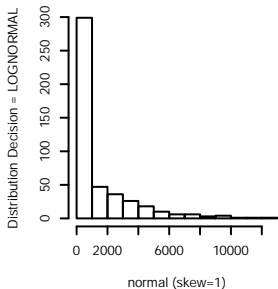

M5\_39186

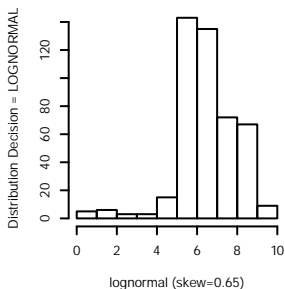

M5\_23865

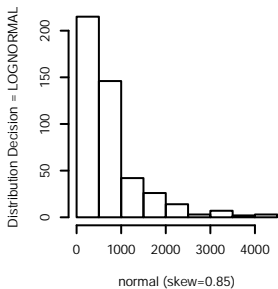

M5\_23865

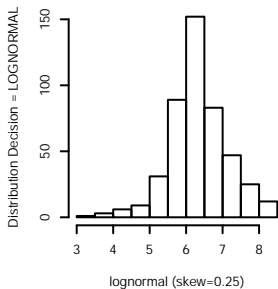

M5\_99199

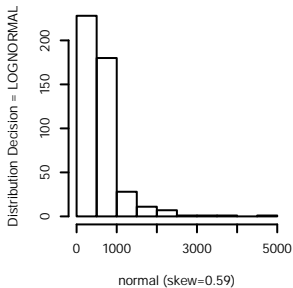

M5\_99199

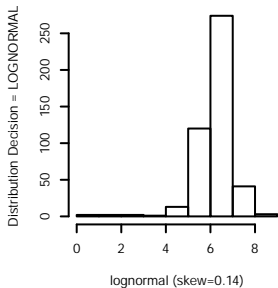



M5\_31850

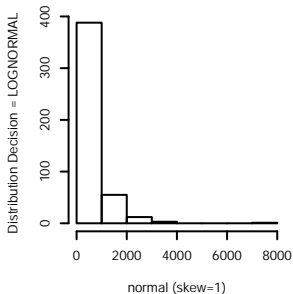

M5\_31850

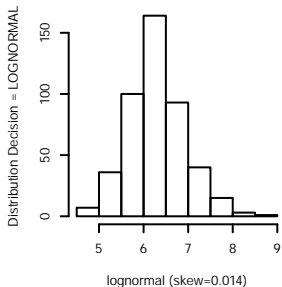

M5\_99216

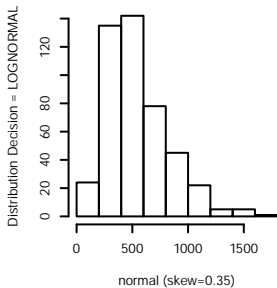

M5\_99216

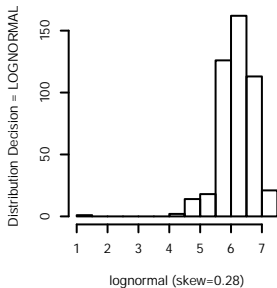

M5\_99158

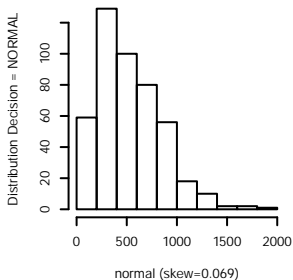

M5\_99158

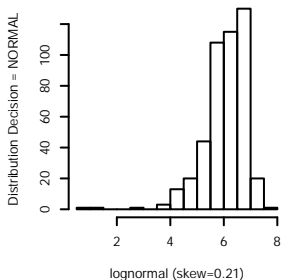

M5\_13143

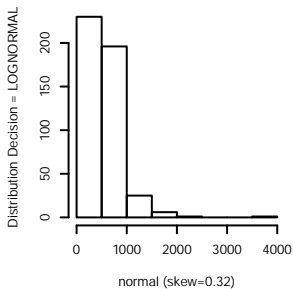

M5\_13143

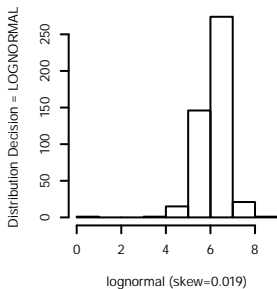

M5\_20946

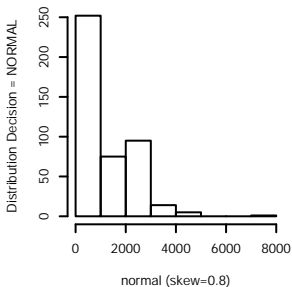

M5\_20946

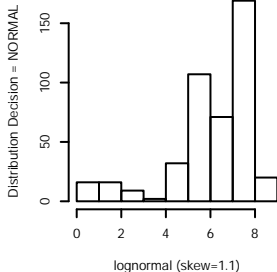

M5\_68506

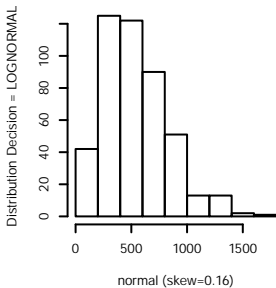

M5\_68506

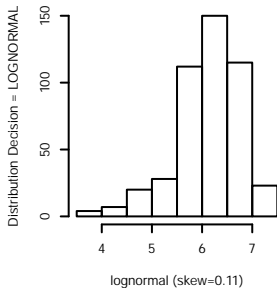

M5\_26927

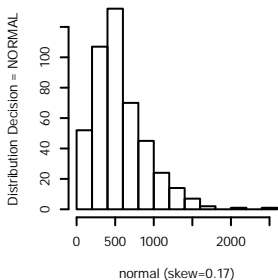

M5\_26927

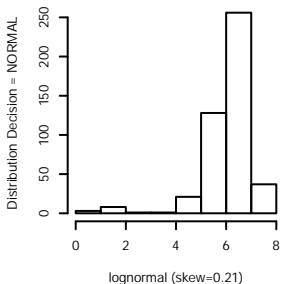

M5\_80247

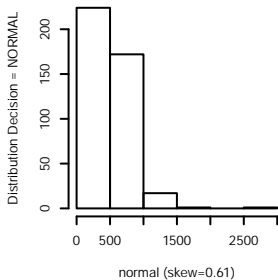

M5\_80247

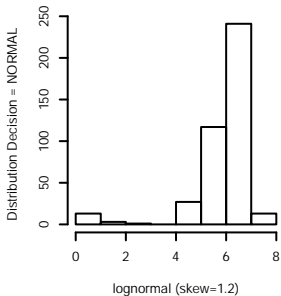

M5\_94991

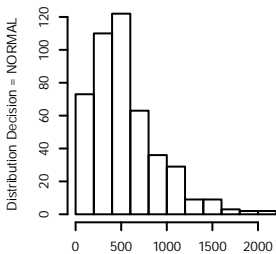

normal (skew=0.14)

M5\_94991

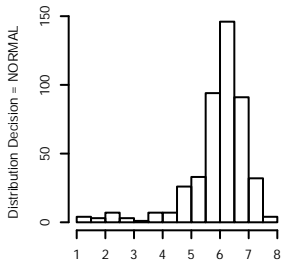

lognormal (skew=0.34)

M5\_62626

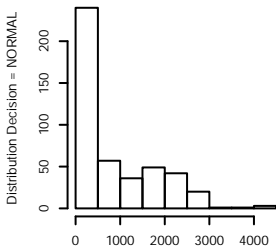

normal (skew=0.48)

M5\_62626

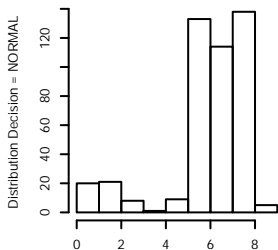

lognormal (skew=1.1)

M5\_67805

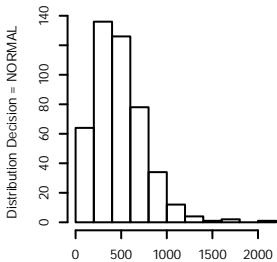

normal (skew=0)

M5\_67805

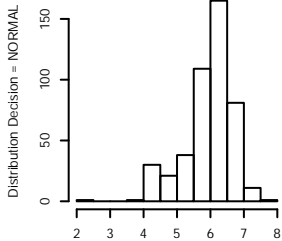

lognormal (skew=0.15)

M5\_65844

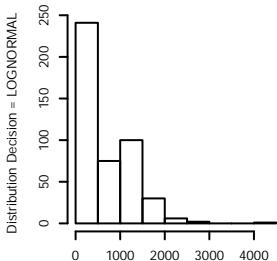

normal (skew=0.74)

M5\_65844

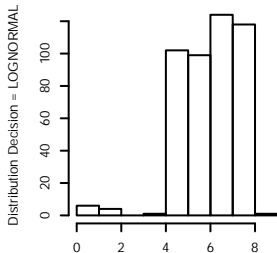

lognormal (skew=0.038)

M5\_23505

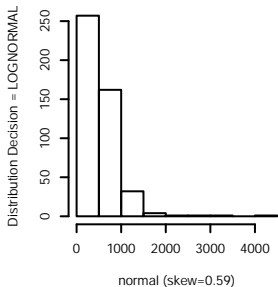

M5\_23505

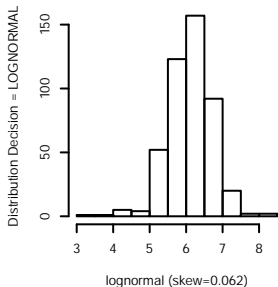

M5\_70909

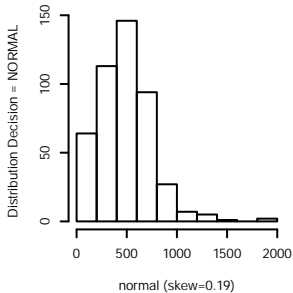

M5\_70909

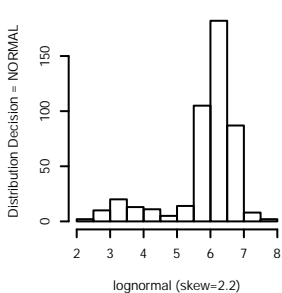

M5\_70407

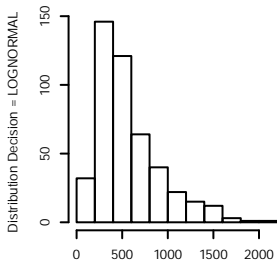

M5\_70407

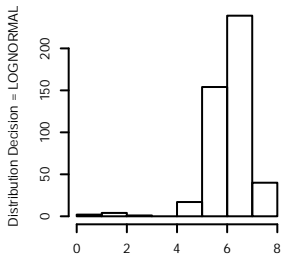

M5\_81108

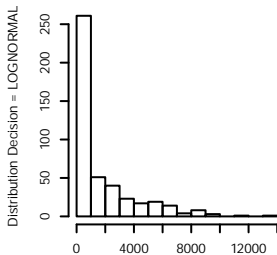

M5\_81108

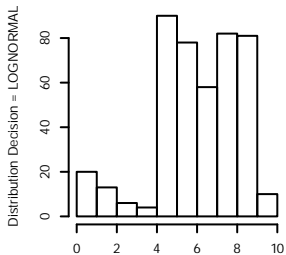



M5\_25427

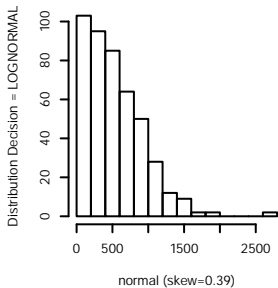

M5\_25427

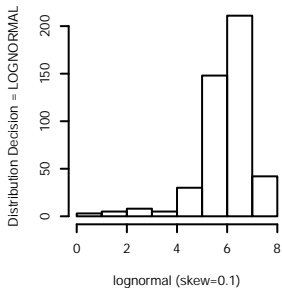

M5\_56957

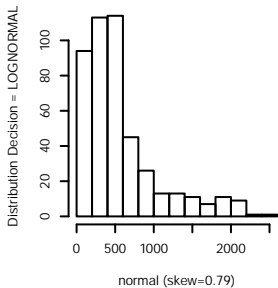

M5\_56957

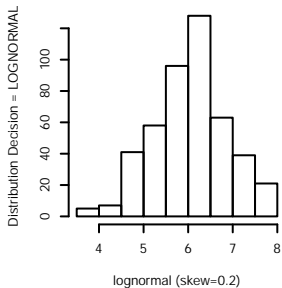

M5\_74386

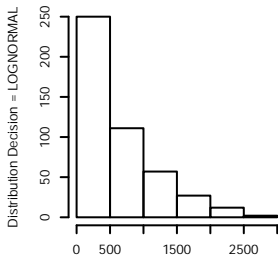

M5\_74386

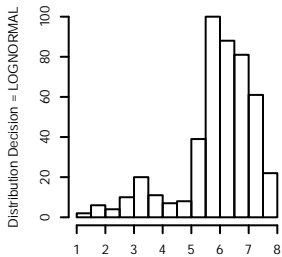

M5\_23597

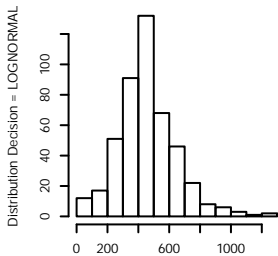

M5\_23597

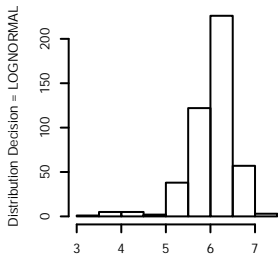

M5\_28018

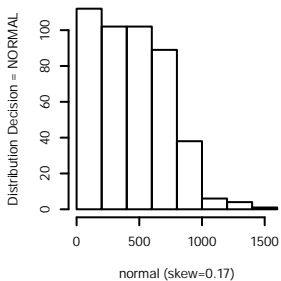

M5\_28018

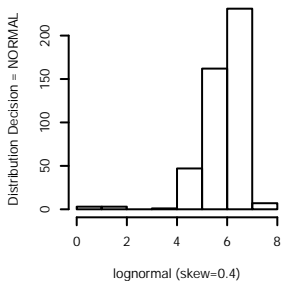

M5\_23790

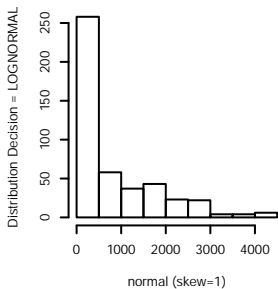

M5\_23790

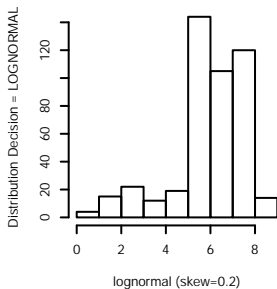

M5\_19709

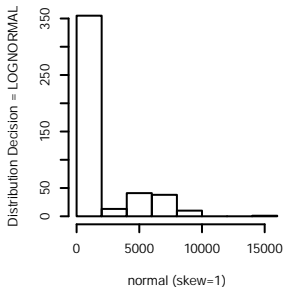

M5\_19709

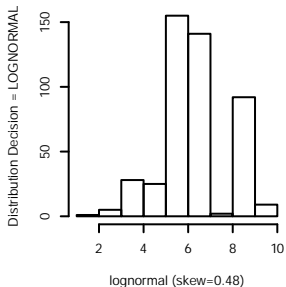

M5\_99553

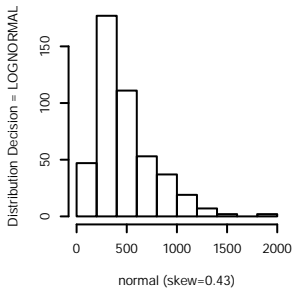

M5\_99553

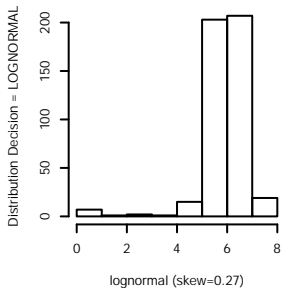

M5\_16746

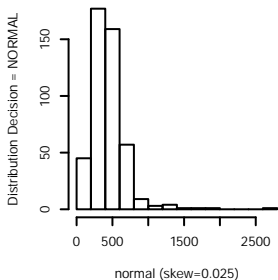

M5\_16746

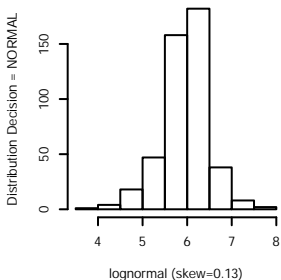

M5\_25262

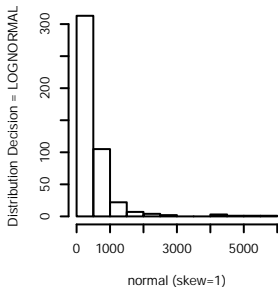

M5\_25262

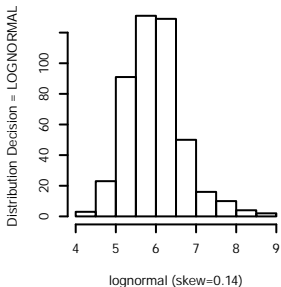

M5\_38075

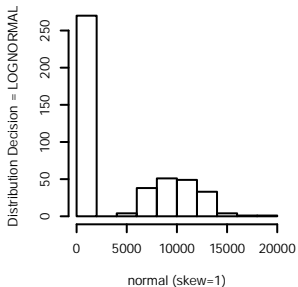

M5\_38075

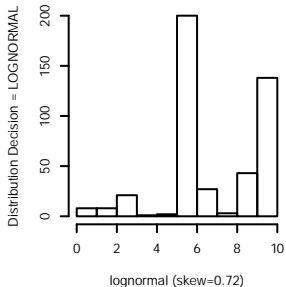

M5\_23809

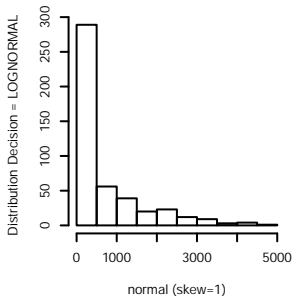

M5\_23809

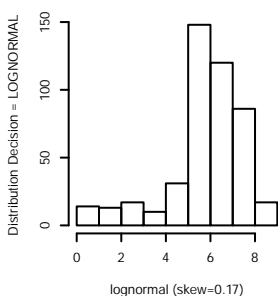

M5\_28147

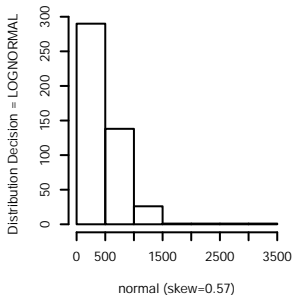

M5\_28147

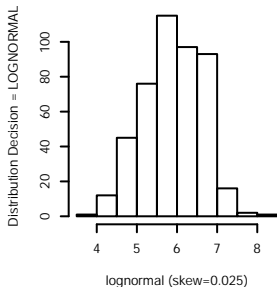

M5\_17346

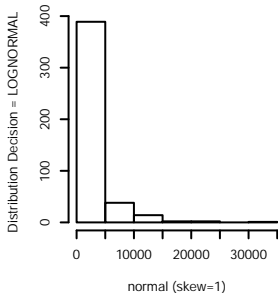

M5\_17346

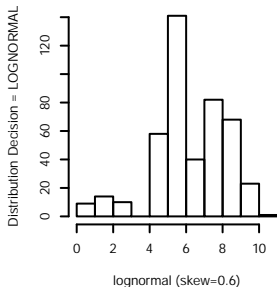

M5\_00484

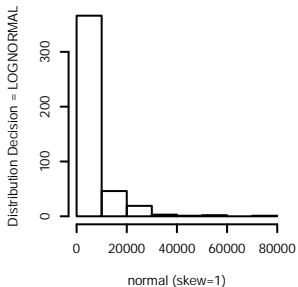

M5\_00484

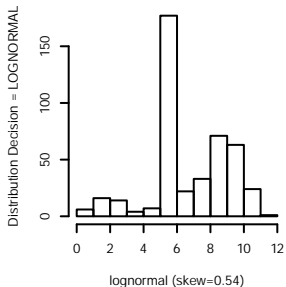

M5\_25283

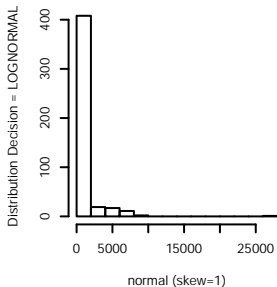

M5\_25283

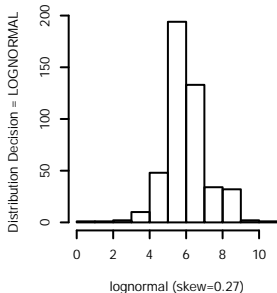



M5\_17225

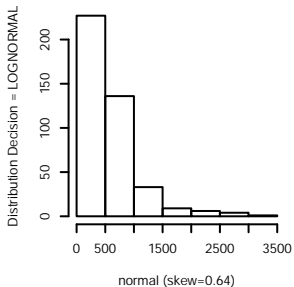

M5\_17225

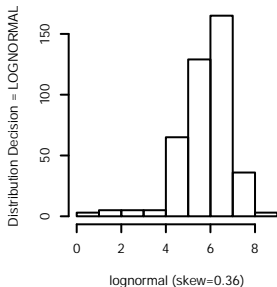

M5\_93097

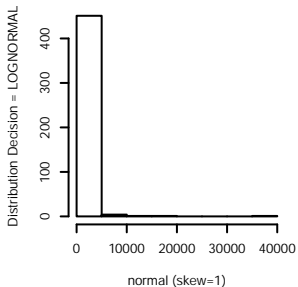

M5\_93097

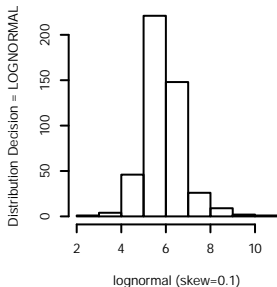

M5\_66053

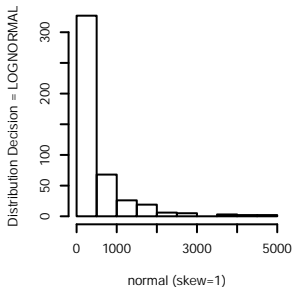

M5\_66053

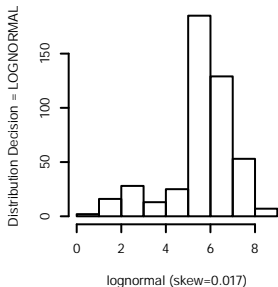

M5\_39995

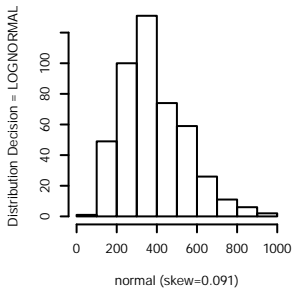

M5\_39995

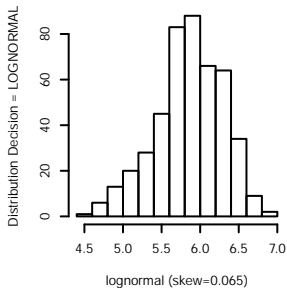

M5\_23993

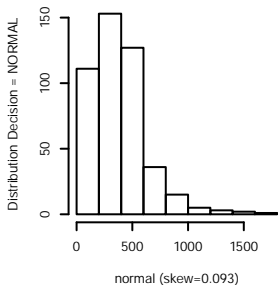

M5\_23993

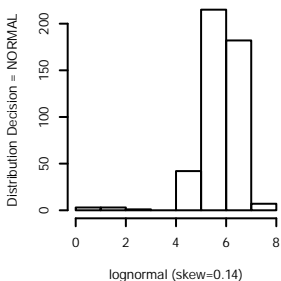

M5\_23618

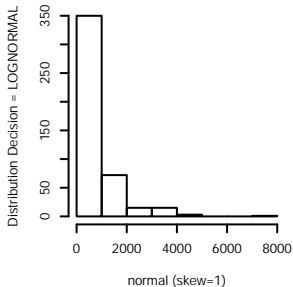

M5\_23618

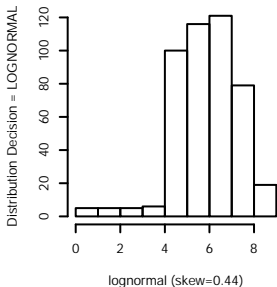

M5\_41310

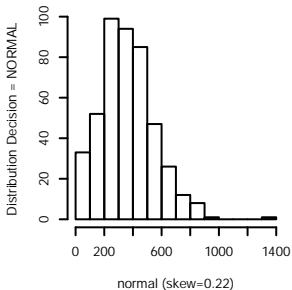

M5\_41310

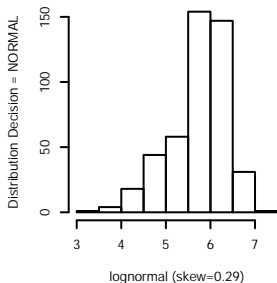

M5\_62786

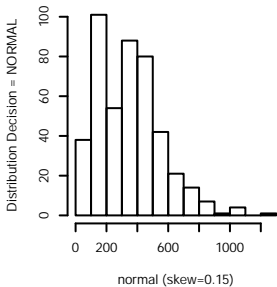

M5\_62786

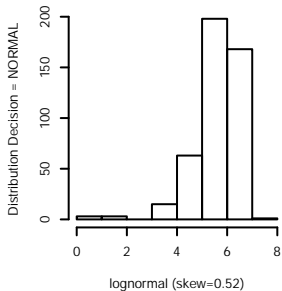

M5\_12022

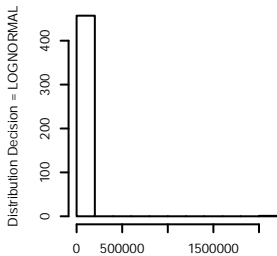

M5\_12022

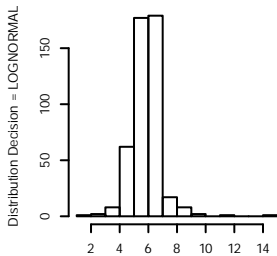

M5\_99211

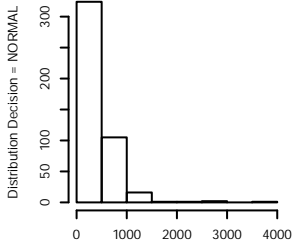

M5\_99211

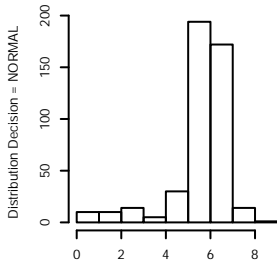

M5\_41881

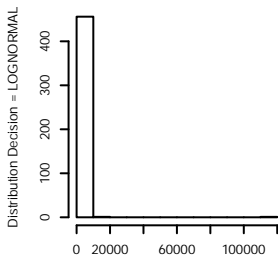

M5\_41881

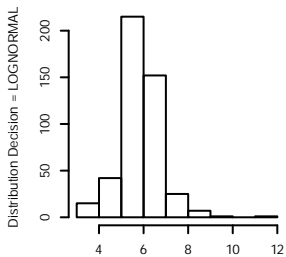

M5\_40432

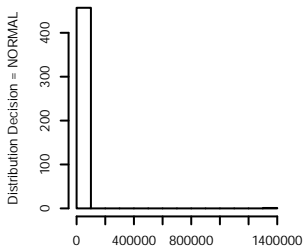

M5\_40432

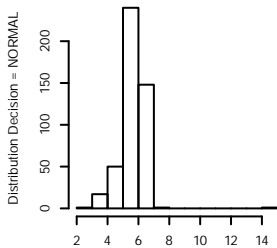

M5\_13193

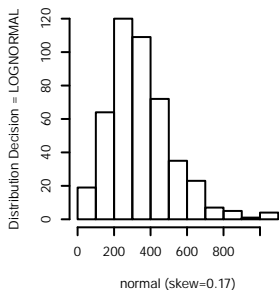

M5\_13193

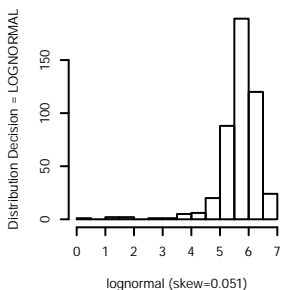

M5\_95003

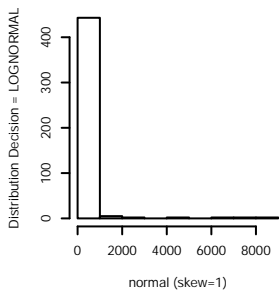

M5\_95003

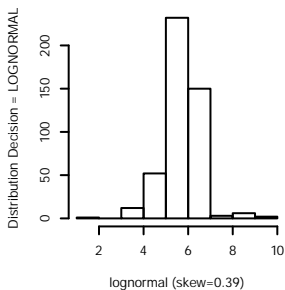

M5\_01862

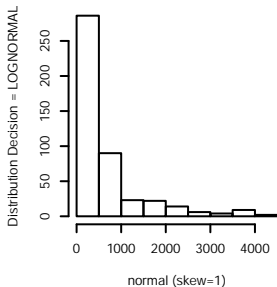

M5\_01862

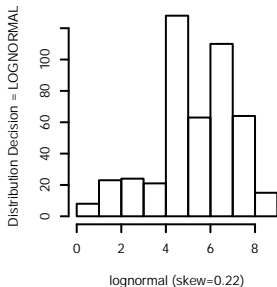

M5\_19779

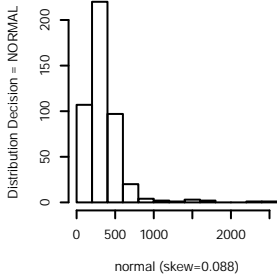

M5\_19779

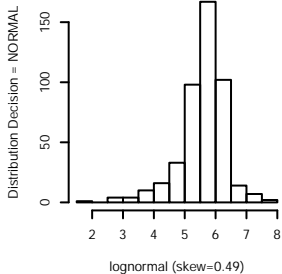



M5\_08611

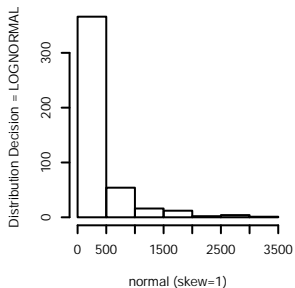

M5\_08611

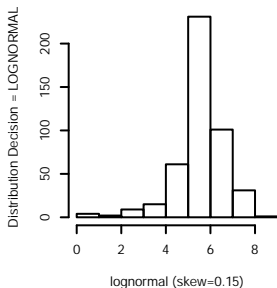

M5\_27387

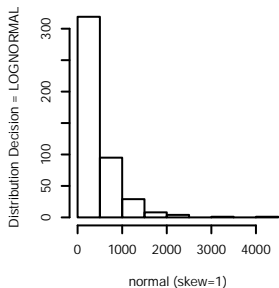

M5\_27387

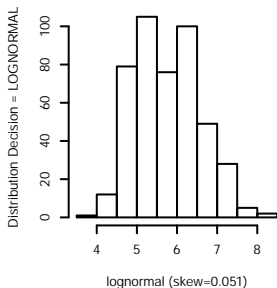

M5\_41572

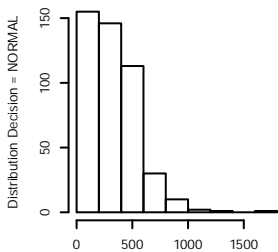

normal (skew=0.1)

M5\_41572

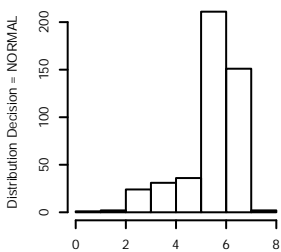

lognormal (skew=0.91)

M5\_09708

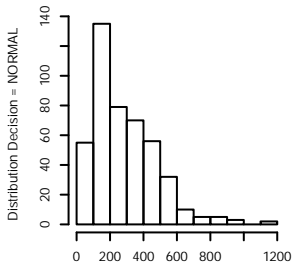

normal (skew=0.17)

M5\_09708

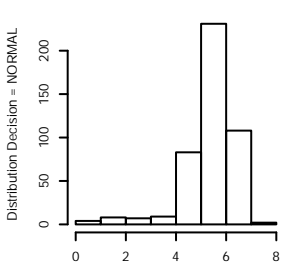

lognormal (skew=0.3)

M5\_25539

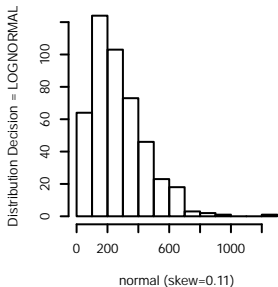

M5\_25539

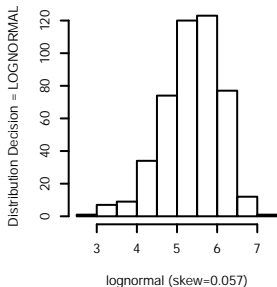

M5\_39490

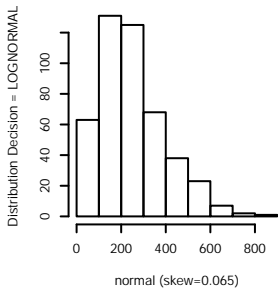

M5\_39490

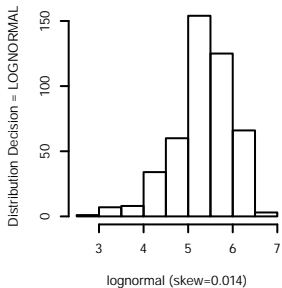

M5\_39485

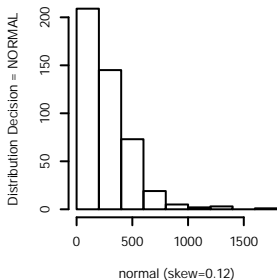

M5\_39485

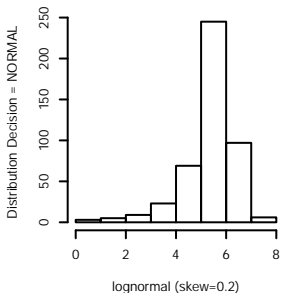

M5\_81131

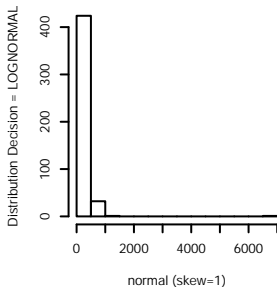

M5\_81131

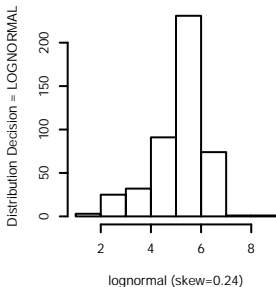

M5\_56938

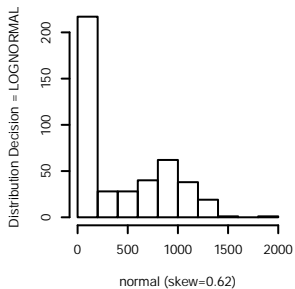

M5\_56938

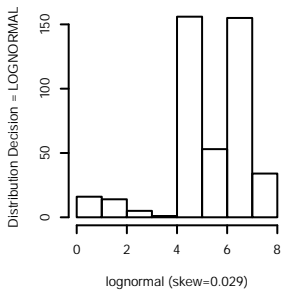

Supplement: PSP4-4-669-s004.pdf [file PSP4-4-669-s004.pdf]
